# Supplementary material
Source: publisher figshare collection journal article supplement (https://acs.figshare.com/ndownloader/files/3856621)
Supplement: Supplementary file 1 [file 3856621]

data_2BARCL2

#--------------------------------- 
# [IrCp*PO(OEt)2NC8H9][BArCl4]
#--------------------------------- 

_audit_creation_date        "2014-09-20"
_audit_creation_method CRYSTALS_ver_14.43

_oxford_structure_analysis_title  'HCJ_024 At 14: 3 on 20/ 9'
_chemical_name_systematic         '[IrCp*PO(OEt)2NC8H9][BArCl4]'
_chemical_melting_point           .


_refine_special_details 
; 

The structure was refined anisotropically.

All H atoms were found on the Fourier map and refined before RIDE
restraints were added.


;


_cell_length_a                    13.34630(10)
_cell_length_b                    20.8617(2)
_cell_length_c                    17.8625(2)
_cell_angle_alpha                 90
_cell_angle_beta                  94.8267(4)
_cell_angle_gamma                 90
_cell_volume                      4955.76(8)
 
_symmetry_cell_setting            'monoclinic' 
_symmetry_space_group_name_H-M    'P 21/n ' 
_symmetry_space_group_name_Hall   '-P 2yn' 
loop_
 _symmetry_equiv_pos_as_xyz
 'x,y,z'
 '-x,-y,-z'
 'x+1/2,-y+1/2,z+1/2'
 '-x+1/2,y+1/2,-z+1/2'

loop_
_atom_type_symbol
_atom_type_scat_dispersion_real
_atom_type_scat_dispersion_imag
_atom_type_scat_Cromer_Mann_a1
_atom_type_scat_Cromer_Mann_b1
_atom_type_scat_Cromer_Mann_a2
_atom_type_scat_Cromer_Mann_b2
_atom_type_scat_Cromer_Mann_a3
_atom_type_scat_Cromer_Mann_b3
_atom_type_scat_Cromer_Mann_a4
_atom_type_scat_Cromer_Mann_b4
_atom_type_scat_Cromer_Mann_c
_atom_type_scat_source  
 Ir     -1.4442   7.9887  27.3049   1.5928  16.7296   8.8655  15.6115   0.4179
   5.8338  45.0011  11.4722 'International Tables Vol C 4.2.6.8 and 6.1.1.4'
 P       0.1023   0.0942   6.4345   1.9067   4.1791  27.1570   1.7800   0.5260
   1.4908  68.1645   1.1149 'International Tables Vol C 4.2.6.8 and 6.1.1.4'
 N       0.0061   0.0033  12.2126   0.0057   3.1322   9.8933   2.0125  28.9975
   1.1663   0.5826 -11.5290 'International Tables Vol C 4.2.6.8 and 6.1.1.4'
 O       0.0106   0.0060   3.0485  13.2771   2.2868   5.7011   1.5463   0.3239
   0.8670  32.9089   0.2508 'International Tables Vol C 4.2.6.8 and 6.1.1.4'
 C       0.0033   0.0016   2.3100  20.8439   1.0200  10.2075   1.5886   0.5687
   0.8650  51.6512   0.2156 'International Tables Vol C 4.2.6.8 and 6.1.1.4'
 B       0.0013   0.0007   2.0545  23.2185   1.3326   1.0210   1.0979  60.3498
   0.7068   0.1403  -0.1932 'International Tables Vol C 4.2.6.8 and 6.1.1.4'
 Cl      0.1484   0.1585  11.4604   0.0104   7.1964   1.1662   6.2556  18.5194
   1.6455  47.7784  -9.5574 'International Tables Vol C 4.2.6.8 and 6.1.1.4'
 H       0.0000   0.0000   0.4930  10.5109   0.3229  26.1257   0.1402   3.1424
   0.0408  57.7998   0.0030 'International Tables Vol C 4.2.6.8 and 6.1.1.4'
 
 
_cell_formula_units_Z                    4

# Given Formula = C46 H46 B1 Cl8 Ir1 N1 O3 P1 
# Dc =      1.58 Fooo =   2344.00 Mu =     31.98 M =   1178.50
# Found Formula = C46 H46 B1 Cl8 Ir1 N1 O3 P1 
# Dc =      1.58 FOOO =   2344.00 Mu =     31.98 M =   1178.50

_chemical_formula_sum             'C46 H46 B1 Cl8 Ir1 N1 O3 P1'
_chemical_formula_moiety          'C24 H12 B1 Cl8, Ir1 N1 O3 P1 C22 H34'
_chemical_compound_source                ?
_chemical_formula_weight           1178.50
 
 
_cell_measurement_reflns_used        11528
_cell_measurement_theta_min              5
_cell_measurement_theta_max             27
_cell_measurement_temperature          150
 
_exptl_crystal_description        'block' 
_exptl_crystal_colour             'red' 
_exptl_crystal_size_min           0.040 
_exptl_crystal_size_mid           0.140 
_exptl_crystal_size_max           0.160 
 
_exptl_crystal_density_diffrn     1.579 
_exptl_crystal_density_meas       ? 
_exptl_crystal_density_method     'not measured' 
# Non-dispersive F(000): 
_exptl_crystal_F_000              2344 
_exptl_absorpt_coefficient_mu     3.198 
 
# Sheldrick geometric approximatio 0.64 0.88 
_exptl_absorpt_correction_type    multi-scan 
_exptl_absorpt_process_details    'DENZO/SCALEPACK (Otwinowski & Minor, 1997)' 
_exptl_absorpt_correction_T_min   0.9134 
_exptl_absorpt_correction_T_max   1 
# For a Kappa CCD, set Tmin to 1.0 and 
# Tmax to the ratio of max:min frame scales in scale_all.log 
_diffrn_measurement_device_type   'Nonius KappaCCD' 
_diffrn_measurement_device        'Area' 
_diffrn_radiation_monochromator   'graphite' 
_diffrn_radiation_type            'Mo K\a'
_diffrn_radiation_wavelength           0.71073
_diffrn_measurement_method        \w 
 
# If a reference occurs more than once, delete the author 
# and date from subsequent references. 
_computing_data_collection        'COLLECT (Nonius, 2001).' 
_computing_cell_refinement        'DENZO/SCALEPACK (Otwinowski & Minor, 1997)' 
_computing_data_reduction         'DENZO/SCALEPACK (Otwinowski & Minor, 1997)' 
_computing_structure_solution     'Superflip (Palatinus & Chapuis, 2007)' 
_computing_structure_refinement   'CRYSTALS (Betteridge et al., 2003)' 
_computing_publication_material   'CRYSTALS (Betteridge et al., 2003)' 
_computing_molecular_graphics     'CAMERON (Watkin et al., 1996)' 
 
_diffrn_standards_interval_time   . 
_diffrn_standards_interval_count  . 
_diffrn_standards_number          0 
_diffrn_standards_decay_%         ? 
 
_diffrn_ambient_temperature        150
_diffrn_reflns_number             73828 
_reflns_number_total              11286 
_diffrn_reflns_av_R_equivalents   0.040 
# Number of reflections without Friedels Law is 20646 
# Number of reflections with Friedels Law is 11286 
# Theoretical number of reflections is about 11378 
 
 
_diffrn_reflns_theta_min          5.121 
_diffrn_reflns_theta_max          27.494 
_diffrn_measured_fraction_theta_max 0.992 
 
_diffrn_reflns_theta_full         26.944 
_diffrn_measured_fraction_theta_full 0.993 
 
 
_diffrn_reflns_limit_h_min        -17 
_diffrn_reflns_limit_h_max        17 
_diffrn_reflns_limit_k_min        -27 
_diffrn_reflns_limit_k_max        23 
_diffrn_reflns_limit_l_min        -23 
_diffrn_reflns_limit_l_max        23 
_reflns_limit_h_min               -17 
_reflns_limit_h_max               17 
_reflns_limit_k_min               0 
_reflns_limit_k_max               27 
_reflns_limit_l_min               0 
_reflns_limit_l_max               23 
 
_oxford_diffrn_Wilson_B_factor    2.27 
_oxford_diffrn_Wilson_scale       162.63 
 
_atom_sites_solution_primary      Other  #heavy,direct,difmap,geom
# _atom_sites_solution_secondary  difmap
_atom_sites_solution_hydrogens    difmap
 
_refine_diff_density_min          -1.64 
_refine_diff_density_max          2.74 
 
 
# The current dictionary definitions do not cover the 
# situation where the reflections used for refinement were 
# selected by a user-defined sigma threshold 
 
 
# The values actually used during refinement 
_oxford_reflns_threshold_expression_ref     I>-3.0\s(I)
_refine_ls_number_reflns          11286 
_refine_ls_number_restraints      0 
_refine_ls_number_parameters      550 
_oxford_refine_ls_R_factor_ref    0.0642 
_refine_ls_wR_factor_ref          0.0762 
_refine_ls_goodness_of_fit_ref    0.9155 
_refine_ls_shift/su_max           0.0032991 
_refine_ls_shift/su_mean          0.0000410 
 
 
# The values computed with all filters except I/sigma 
_oxford_reflns_number_all         11286 
_refine_ls_R_factor_all           0.0642 
_refine_ls_wR_factor_all          0.0762 
 
# The values computed with a 2 sigma cutoff - a la SHELX 
_reflns_threshold_expression      I>2.0\s(I)
_reflns_number_gt                 8100 
_refine_ls_R_factor_gt            0.0355 
_refine_ls_wR_factor_gt           0.0689 
 
# choose from: rm (reference molecule of known chirality), 
# ad (anomolous dispersion - Flack), rmad (rm and ad), 
# syn (from synthesis), unk (unknown) or . (not applicable). 
_chemical_absolute_configuration  '.' 
 
 
_refine_ls_structure_factor_coef  Fsqd 
_refine_ls_matrix_type            full
_refine_ls_hydrogen_treatment     constr         #undef, noref, refall,
                                                 # refxyz, refU, constr or mixed
_refine_ls_weighting_scheme       calc 
_refine_ls_weighting_details 
;
 Method= Modified Sheldrick 
 w=1/[\s^2^(F^2^) + ( 0.04P)^2^ + 2.30P] 
 ,where P=(max(Fo^2^,0) + 2Fc^2^)/3 
;
# Insert your own references if required - in alphabetical order 
_publ_section_references 
; 
Betteridge, P.W., Carruthers, J.R., Cooper, R.I., 
Prout, K. & Watkin, D.J. (2003). J. Appl. Cryst. 36, 1487. 
 
Nonius (2001). COLLECT. Nonius BV, Delft, The Netherlands. 
 
Otwinowski, Z. & Minor, W. (1997). Methods in Enzymology, Vol. 276, 
edited by C. W. Carter Jr & R. M. Sweet, pp. 307--326. 
New York: Academic Press. 
 
Palatinus, L. & Chapuis, G. (2007). J. Appl. Cryst. 40, 786-790. 
 
Watkin, D.J., Prout, C.K. & Pearce, L.J. (1996). CAMERON, Chemical 
Crystallography Laboratory, Oxford, UK. 
; 

# Uequiv = arithmetic mean of Ui i.e. Ueqiv = (U1+U2+U3)/3

# Replace last . with number of unfound hydrogen atoms attached to an atom.

# ..._refinement_flags_... 
# . no refinement constraints           S special position constraint on site
# G rigid group refinement of site      R riding atom
# D distance or angle restraint on site T thermal displacement constraints
# U Uiso or Uij restraint (rigid bond)  P partial occupancy constraint


loop_
_atom_site_label
_atom_site_type_symbol
_atom_site_fract_x
_atom_site_fract_y
_atom_site_fract_z
_atom_site_U_iso_or_equiv
_atom_site_occupancy
_atom_site_adp_type
_atom_site_refinement_flags_posn
_atom_site_refinement_flags_adp
_atom_site_refinement_flags_occupancy
_atom_site_disorder_assembly
_atom_site_disorder_group
_atom_site_attached_hydrogens
Cl1 Cl 0.86314(8) 0.50146(5) 0.51066(7) 0.0509 1.0000 Uani . . . . . . 
Cl2 Cl 0.94884(8) 0.25510(6) 0.58362(6) 0.0475 1.0000 Uani . . . . . . 
Cl3 Cl 0.83738(8) 0.47098(5) 0.14237(6) 0.0474 1.0000 Uani . . . . . . 
Cl4 Cl 0.94991(7) 0.22286(5) 0.14996(6) 0.0424 1.0000 Uani . . . . . . 
Cl5 Cl 0.55847(8) 0.11937(5) 0.50237(6) 0.0510 1.0000 Uani . . . . . . 
Cl6 Cl 0.57974(8) 0.09441(5) 0.20448(6) 0.0477 1.0000 Uani . . . . . . 
Cl7 Cl 0.39433(9) 0.42867(6) 0.46927(8) 0.0640 1.0000 Uani . . . . . . 
Cl8 Cl 0.39982(8) 0.42689(6) 0.16873(7) 0.0534 1.0000 Uani . . . . . . 
C1 C 0.2217(3) 0.77134(17) 0.1817(2) 0.0318 1.0000 Uani . . . . . . 
C2 C 0.3084(2) 0.80915(16) 0.2100(2) 0.0290 1.0000 Uani . . . . . . 
C3 C 0.3604(2) 0.82937(15) 0.14782(19) 0.0213 1.0000 Uani . . . . . . 
C4 C 0.3088(3) 0.80529(18) 0.0811(2) 0.0321 1.0000 Uani . . . . . . 
C5 C 0.2227(3) 0.76879(17) 0.1019(2) 0.0334 1.0000 Uani . . . . . . 
C6 C 0.1445(3) 0.7419(2) 0.2265(3) 0.0460 1.0000 Uani . . . . . . 
C7 C 0.3347(3) 0.8245(2) 0.2901(2) 0.0416 1.0000 Uani . . . . . . 
C8 C 0.4552(3) 0.86947(18) 0.1511(2) 0.0377 1.0000 Uani . . . . . . 
C9 C 0.3339(3) 0.8163(2) 0.0022(2) 0.0458 1.0000 Uani . . . . . . 
C10 C 0.1461(3) 0.7363(2) 0.0494(3) 0.0472 1.0000 Uani . . . . . . 
C11 C 0.2804(2) 0.58681(16) 0.1876(2) 0.0289 1.0000 Uani . . . . . . 
C12 C 0.2600(3) 0.57753(18) 0.2626(2) 0.0362 1.0000 Uani . . . . . . 
C13 C 0.1830(3) 0.5355(2) 0.2764(3) 0.0477 1.0000 Uani . . . . . . 
C14 C 0.1304(3) 0.50350(19) 0.2189(3) 0.0515 1.0000 Uani . . . . . . 
C15 C 0.1504(3) 0.5131(2) 0.1459(3) 0.0490 1.0000 Uani . . . . . . 
C16 C 0.2270(3) 0.55542(18) 0.1292(2) 0.0374 1.0000 Uani . . . . . . 
C17 C 0.3180(3) 0.6121(2) 0.3265(2) 0.0476 1.0000 Uani . . . . . . 
C18 C 0.2499(3) 0.5654(2) 0.0490(3) 0.0526 1.0000 Uani . . . . . . 
C19 C 0.5379(3) 0.5982(2) 0.0288(2) 0.0417 1.0000 Uani . . . . . . 
C20 C 0.6504(3) 0.6006(2) 0.0327(3) 0.0520 1.0000 Uani . . . . . . 
C21 C 0.6271(3) 0.5670(2) 0.2473(3) 0.0458 1.0000 Uani . . . . . . 
C22 C 0.6484(3) 0.5479(2) 0.3268(3) 0.0498 1.0000 Uani . . . . . . 
C23 C 0.7683(2) 0.33442(17) 0.4172(2) 0.0288 1.0000 Uani . . . . . . 
C24 C 0.7820(3) 0.39925(18) 0.4344(2) 0.0319 1.0000 Uani . . . . . . 
C25 C 0.8473(3) 0.41929(18) 0.4938(2) 0.0357 1.0000 Uani . . . . . . 
C26 C 0.9002(3) 0.3762(2) 0.5410(2) 0.0379 1.0000 Uani . . . . . . 
C27 C 0.8865(3) 0.31195(19) 0.5245(2) 0.0347 1.0000 Uani . . . . . . 
C28 C 0.8238(3) 0.29094(18) 0.4636(2) 0.0309 1.0000 Uani . . . . . . 
C29 C 0.7649(2) 0.32368(17) 0.2724(2) 0.0260 1.0000 Uani . . . . . . 
C30 C 0.7726(3) 0.38452(17) 0.2392(2) 0.0292 1.0000 Uani . . . . . . 
C31 C 0.8313(3) 0.39430(17) 0.1800(2) 0.0283 1.0000 Uani . . . . . . 
C32 C 0.8855(3) 0.34523(19) 0.1505(2) 0.0342 1.0000 Uani . . . . . . 
C33 C 0.8813(3) 0.28646(18) 0.1843(2) 0.0304 1.0000 Uani . . . . . . 
C34 C 0.8240(2) 0.27548(17) 0.2445(2) 0.0277 1.0000 Uani . . . . . . 
C35 C 0.6538(2) 0.23937(17) 0.3470(2) 0.0282 1.0000 Uani . . . . . . 
C36 C 0.6273(3) 0.21293(17) 0.4147(2) 0.0321 1.0000 Uani . . . . . . 
C37 C 0.5860(3) 0.15215(18) 0.4159(2) 0.0347 1.0000 Uani . . . . . . 
C38 C 0.5678(3) 0.11507(19) 0.3526(2) 0.0371 1.0000 Uani . . . . . . 
C39 C 0.5941(2) 0.14110(18) 0.2858(2) 0.0321 1.0000 Uani . . . . . . 
C40 C 0.6349(2) 0.20175(17) 0.2823(2) 0.0289 1.0000 Uani . . . . . . 
C41 C 0.5926(2) 0.35689(17) 0.3342(2) 0.0291 1.0000 Uani . . . . . . 
C42 C 0.5440(3) 0.37527(18) 0.3967(2) 0.0347 1.0000 Uani . . . . . . 
C43 C 0.4530(3) 0.40777(19) 0.3893(3) 0.0417 1.0000 Uani . . . . . . 
C44 C 0.4071(3) 0.42441(18) 0.3198(3) 0.0399 1.0000 Uani . . . . . . 
C45 C 0.4548(3) 0.40653(18) 0.2578(2) 0.0362 1.0000 Uani . . . . . . 
C46 C 0.5447(2) 0.37293(17) 0.2634(2) 0.0319 1.0000 Uani . . . . . . 
Ir1 Ir 0.356690(9) 0.725731(6) 0.152627(8) 0.0260 1.0000 Uani . . . . . . 
P1 P 0.47624(6) 0.62139(4) 0.16429(6) 0.0277 1.0000 Uani . . . . . . 
O1 O 0.50699(16) 0.69032(11) 0.14992(14) 0.0308 1.0000 Uani . . . . . . 
N1 N 0.35755(19) 0.63165(14) 0.17080(17) 0.0289 1.0000 Uani . . . . . . 
O3 O 0.52232(17) 0.58947(12) 0.23754(14) 0.0328 1.0000 Uani . . . . . . 
O2 O 0.50738(18) 0.57510(12) 0.10185(15) 0.0349 1.0000 Uani . . . . . . 
B1 B 0.6957(3) 0.31277(19) 0.3426(2) 0.0272 1.0000 Uani . . . . . . 
H61 H 0.1252 0.6995 0.2084 0.0711 1.0000 Uiso R . . . . . 
H62 H 0.0853 0.7682 0.2242 0.0714 1.0000 Uiso R . . . . . 
H63 H 0.1722 0.7381 0.2781 0.0710 1.0000 Uiso R . . . . . 
H73 H 0.4055 0.8342 0.3004 0.0629 1.0000 Uiso R . . . . . 
H72 H 0.2970 0.8607 0.3045 0.0634 1.0000 Uiso R . . . . . 
H71 H 0.3187 0.7885 0.3217 0.0633 1.0000 Uiso R . . . . . 
H83 H 0.4976 0.8563 0.1128 0.0592 1.0000 Uiso R . . . . . 
H82 H 0.4414 0.9146 0.1451 0.0589 1.0000 Uiso R . . . . . 
H81 H 0.4934 0.8633 0.1990 0.0590 1.0000 Uiso R . . . . . 
H91 H 0.3242 0.7783 -0.0278 0.0701 1.0000 Uiso R . . . . . 
H92 H 0.2912 0.8501 -0.0206 0.0705 1.0000 Uiso R . . . . . 
H93 H 0.4029 0.8288 0.0018 0.0702 1.0000 Uiso R . . . . . 
H103 H 0.1738 0.7236 0.0033 0.0730 1.0000 Uiso R . . . . . 
H102 H 0.0915 0.7647 0.0365 0.0732 1.0000 Uiso R . . . . . 
H101 H 0.1198 0.6984 0.0727 0.0728 1.0000 Uiso R . . . . . 
H131 H 0.1670 0.5290 0.3283 0.0599 1.0000 Uiso R . . . . . 
H141 H 0.0776 0.4746 0.2297 0.0633 1.0000 Uiso R . . . . . 
H151 H 0.1122 0.4916 0.1053 0.0591 1.0000 Uiso R . . . . . 
H173 H 0.2813 0.6115 0.3706 0.0722 1.0000 Uiso R . . . . . 
H172 H 0.3285 0.6566 0.3132 0.0721 1.0000 Uiso R . . . . . 
H171 H 0.3843 0.5925 0.3390 0.0723 1.0000 Uiso R . . . . . 
H181 H 0.1979 0.5471 0.0151 0.0791 1.0000 Uiso R . . . . . 
H182 H 0.2555 0.6106 0.0383 0.0792 1.0000 Uiso R . . . . . 
H183 H 0.3148 0.5462 0.0399 0.0793 1.0000 Uiso R . . . . . 
H191 H 0.5076 0.6407 0.0169 0.0533 1.0000 Uiso R . . . . . 
H192 H 0.5107 0.5676 -0.0104 0.0533 1.0000 Uiso R . . . . . 
H203 H 0.6715 0.6140 -0.0159 0.0780 1.0000 Uiso R . . . . . 
H202 H 0.6762 0.6311 0.0705 0.0778 1.0000 Uiso R . . . . . 
H201 H 0.6786 0.5580 0.0446 0.0782 1.0000 Uiso R . . . . . 
H211 H 0.6722 0.6013 0.2327 0.0565 1.0000 Uiso R . . . . . 
H212 H 0.6343 0.5297 0.2136 0.0569 1.0000 Uiso R . . . . . 
H223 H 0.7169 0.5333 0.3358 0.0759 1.0000 Uiso R . . . . . 
H222 H 0.6377 0.5835 0.3595 0.0756 1.0000 Uiso R . . . . . 
H221 H 0.6045 0.5129 0.3387 0.0762 1.0000 Uiso R . . . . . 
H241 H 0.7455 0.4307 0.4035 0.0404 1.0000 Uiso R . . . . . 
H261 H 0.9429 0.3903 0.5833 0.0474 1.0000 Uiso R . . . . . 
H281 H 0.8193 0.2456 0.4536 0.0383 1.0000 Uiso R . . . . . 
H301 H 0.7373 0.4198 0.2585 0.0359 1.0000 Uiso R . . . . . 
H321 H 0.9233 0.3521 0.1081 0.0420 1.0000 Uiso R . . . . . 
H341 H 0.8248 0.2339 0.2665 0.0347 1.0000 Uiso R . . . . . 
H361 H 0.6369 0.2369 0.4600 0.0398 1.0000 Uiso R . . . . . 
H381 H 0.5382 0.0734 0.3539 0.0452 1.0000 Uiso R . . . . . 
H401 H 0.6510 0.2180 0.2357 0.0351 1.0000 Uiso R . . . . . 
H421 H 0.5748 0.3652 0.4468 0.0442 1.0000 Uiso R . . . . . 
H441 H 0.3461 0.4470 0.3158 0.0495 1.0000 Uiso R . . . . . 
H461 H 0.5734 0.3604 0.2175 0.0399 1.0000 Uiso R . . . . . 
loop_
_atom_site_aniso_label
_atom_site_aniso_U_11
_atom_site_aniso_U_22
_atom_site_aniso_U_33
_atom_site_aniso_U_23
_atom_site_aniso_U_13
_atom_site_aniso_U_12
Cl1 0.0498(6) 0.0354(6) 0.0663(8) -0.0158(5) -0.0025(5) 0.0004(5) 
Cl2 0.0499(6) 0.0539(6) 0.0371(6) 0.0084(5) -0.0050(5) 0.0126(5) 
Cl3 0.0667(7) 0.0313(5) 0.0455(7) 0.0101(5) 0.0116(5) -0.0064(5) 
Cl4 0.0456(5) 0.0399(6) 0.0436(6) -0.0008(5) 0.0157(5) 0.0088(4) 
Cl5 0.0569(6) 0.0451(6) 0.0550(7) 0.0175(5) 0.0279(5) 0.0046(5) 
Cl6 0.0469(6) 0.0441(6) 0.0503(7) -0.0085(5) -0.0069(5) -0.0070(5) 
Cl7 0.0502(6) 0.0726(8) 0.0735(9) -0.0074(7) 0.0312(6) 0.0123(6) 
Cl8 0.0407(5) 0.0541(7) 0.0624(8) 0.0142(6) -0.0132(5) 0.0068(5) 
C1 0.0244(17) 0.0252(19) 0.047(2) 0.0050(18) 0.0110(16) 0.0070(15) 
C2 0.0282(18) 0.0236(19) 0.036(2) -0.0025(16) 0.0079(16) 0.0081(14) 
C3 0.0165(15) 0.0184(17) 0.0286(19) 0.0011(15) -0.0001(13) 0.0054(13) 
C4 0.0276(18) 0.030(2) 0.039(2) 0.0071(17) 0.0032(16) 0.0056(15) 
C5 0.0237(17) 0.031(2) 0.045(2) 0.0044(18) 0.0006(16) 0.0067(15) 
C6 0.038(2) 0.037(2) 0.065(3) 0.005(2) 0.017(2) 0.0031(18) 
C7 0.048(2) 0.034(2) 0.043(3) -0.0057(19) 0.0056(19) 0.0078(19) 
C8 0.034(2) 0.029(2) 0.050(3) -0.0007(19) 0.0029(18) -0.0029(16) 
C9 0.049(2) 0.049(3) 0.039(3) 0.006(2) 0.006(2) 0.003(2) 
C10 0.034(2) 0.047(3) 0.058(3) 0.000(2) -0.007(2) 0.0000(18) 
C11 0.0233(17) 0.0166(17) 0.047(2) 0.0041(16) 0.0037(16) 0.0011(14) 
C12 0.0300(19) 0.028(2) 0.052(3) 0.0048(19) 0.0098(18) 0.0083(16) 
C13 0.032(2) 0.038(2) 0.075(3) 0.020(2) 0.016(2) 0.0079(18) 
C14 0.032(2) 0.024(2) 0.099(4) 0.013(2) 0.007(2) 0.0010(17) 
C15 0.032(2) 0.031(2) 0.082(4) -0.008(2) -0.009(2) 0.0020(17) 
C16 0.0308(19) 0.024(2) 0.056(3) -0.0019(19) -0.0010(19) 0.0056(16) 
C17 0.046(2) 0.059(3) 0.039(3) 0.001(2) 0.008(2) 0.010(2) 
C18 0.054(3) 0.051(3) 0.050(3) -0.018(2) -0.013(2) -0.001(2) 
C19 0.052(2) 0.046(3) 0.029(2) 0.0031(19) 0.0118(19) 0.002(2) 
C20 0.050(3) 0.050(3) 0.059(3) 0.000(2) 0.022(2) 0.000(2) 
C21 0.029(2) 0.051(3) 0.058(3) 0.015(2) 0.0051(19) 0.0108(18) 
C22 0.042(2) 0.049(3) 0.057(3) 0.016(2) -0.005(2) 0.008(2) 
C23 0.0235(17) 0.033(2) 0.031(2) 0.0000(17) 0.0081(15) 0.0018(15) 
C24 0.0297(18) 0.029(2) 0.038(2) 0.0005(17) 0.0069(17) 0.0047(15) 
C25 0.035(2) 0.031(2) 0.042(2) -0.0058(18) 0.0065(18) 0.0036(16) 
C26 0.034(2) 0.048(3) 0.032(2) -0.0068(19) 0.0036(17) 0.0050(18) 
C27 0.0324(19) 0.042(2) 0.030(2) 0.0042(18) 0.0064(17) 0.0077(17) 
C28 0.0298(18) 0.031(2) 0.033(2) 0.0002(16) 0.0047(16) 0.0018(15) 
C29 0.0214(16) 0.0285(19) 0.028(2) 0.0005(16) -0.0022(14) -0.0005(14) 
C30 0.0302(18) 0.028(2) 0.030(2) -0.0003(16) 0.0027(16) -0.0014(15) 
C31 0.0340(19) 0.0254(19) 0.025(2) 0.0056(16) -0.0030(16) -0.0038(15) 
C32 0.036(2) 0.039(2) 0.028(2) 0.0013(17) 0.0057(17) -0.0050(17) 
C33 0.0245(17) 0.036(2) 0.030(2) -0.0024(17) 0.0023(15) 0.0021(15) 
C34 0.0228(16) 0.0262(19) 0.033(2) 0.0043(16) -0.0022(14) -0.0009(15) 
C35 0.0205(17) 0.031(2) 0.033(2) 0.0028(17) 0.0021(15) 0.0037(14) 
C36 0.0254(17) 0.034(2) 0.038(2) 0.0034(17) 0.0088(16) 0.0042(15) 
C37 0.0240(18) 0.034(2) 0.048(3) 0.0092(19) 0.0141(17) 0.0052(15) 
C38 0.0255(18) 0.031(2) 0.055(3) 0.002(2) 0.0043(18) -0.0006(16) 
C39 0.0254(18) 0.031(2) 0.039(2) -0.0005(18) 0.0011(16) 0.0013(15) 
C40 0.0228(17) 0.033(2) 0.031(2) 0.0040(17) 0.0033(15) 0.0024(15) 
C41 0.0237(17) 0.0232(19) 0.041(2) 0.0019(17) 0.0048(16) -0.0007(14) 
C42 0.0308(19) 0.034(2) 0.040(2) 0.0016(18) 0.0086(17) 0.0011(16) 
C43 0.032(2) 0.034(2) 0.062(3) -0.002(2) 0.020(2) 0.0005(17) 
C44 0.0241(18) 0.030(2) 0.066(3) 0.008(2) 0.004(2) 0.0048(16) 
C45 0.0272(19) 0.027(2) 0.053(3) 0.0056(19) -0.0035(18) -0.0002(15) 
C46 0.0303(18) 0.0244(19) 0.041(2) 0.0011(17) 0.0021(17) -0.0024(15) 
Ir1 0.02292(7) 0.02197(8) 0.03326(9) 0.00056(7) 0.00404(5) 0.00082(6) 
P1 0.0261(4) 0.0243(5) 0.0332(6) 0.0007(4) 0.0055(4) 0.0021(4) 
O1 0.0244(12) 0.0248(13) 0.0438(16) 0.0013(12) 0.0061(11) 0.0019(10) 
N1 0.0271(15) 0.0251(16) 0.0345(19) 0.0002(13) 0.0024(13) 0.0025(12) 
O3 0.0278(12) 0.0357(15) 0.0349(15) 0.0062(12) 0.0027(11) 0.0070(11) 
O2 0.0422(14) 0.0279(14) 0.0364(16) -0.0004(12) 0.0133(12) 0.0030(11) 
B1 0.026(2) 0.027(2) 0.029(2) 0.0018(18) 0.0024(17) 0.0004(17) 

_refine_ls_extinction_method 
    'None'
_oxford_refine_ls_scale 0.079039(10) 
loop_
 _geom_bond_atom_site_label_1
 _geom_bond_site_symmetry_1
 _geom_bond_atom_site_label_2
 _geom_bond_site_symmetry_2
 _geom_bond_distance
 _geom_bond_publ_flag
Cl1 . C25 . 1.750(4)    yes
Cl2 . C27 . 1.751(4)    yes
Cl3 . C31 . 1.740(4)    yes
Cl4 . C33 . 1.753(4)    yes
Cl5 . C37 . 1.756(4)    yes
Cl6 . C39 . 1.746(4)    yes
Cl7 . C43 . 1.741(4)    yes
Cl8 . C45 . 1.747(4)    yes
C1 . C2 . 1.455(5)    yes
C1 . C5 . 1.428(6)    yes
C1 . C6 . 1.489(5)    yes
C1 . Ir1 . 2.140(3)    yes
C2 . C3 . 1.423(5)    yes
C2 . C7 . 1.480(5)    yes
C2 . Ir1 . 2.146(3)    yes
C3 . C4 . 1.418(5)    yes
C3 . C8 . 1.514(5)    yes
C3 . Ir1 . 2.164(3)    yes
C4 . C5 . 1.453(5)    yes
C4 . C9 . 1.494(5)    yes
C4 . Ir1 . 2.159(4)    yes
C5 . C10 . 1.490(5)    yes
C5 . Ir1 . 2.134(3)    yes
C6 . H61 . 0.970    no
C6 . H62 . 0.960    no
C6 . H63 . 0.968    no
C7 . H73 . 0.969    no
C7 . H72 . 0.954    no
C7 . H71 . 0.974    no
C8 . H83 . 0.963    no
C8 . H82 . 0.965    no
C8 . H81 . 0.967    no
C9 . H91 . 0.959    no
C9 . H92 . 0.973    no
C9 . H93 . 0.959    no
C10 . H103 . 0.967    no
C10 . H102 . 0.952    no
C10 . H101 . 0.974    no
C11 . C12 . 1.402(5)    yes
C11 . C16 . 1.379(5)    yes
C11 . N1 . 1.441(4)    yes
C12 . C13 . 1.388(5)    yes
C12 . C17 . 1.507(6)    yes
C13 . C14 . 1.370(7)    yes
C13 . H131 . 0.978    no
C14 . C15 . 1.367(7)    yes
C14 . H141 . 0.960    no
C15 . C16 . 1.402(6)    yes
C15 . H151 . 0.962    no
C16 . C18 . 1.504(6)    yes
C17 . H173 . 0.962    no
C17 . H172 . 0.973    no
C17 . H171 . 0.983    no
C18 . H181 . 0.961    no
C18 . H182 . 0.967    no
C18 . H183 . 0.980    no
C19 . C20 . 1.498(5)    yes
C19 . O2 . 1.480(4)    yes
C19 . H191 . 0.990    no
C19 . H192 . 0.993    no
C20 . H203 . 0.977    no
C20 . H202 . 0.969    no
C20 . H201 . 0.980    no
C21 . C22 . 1.479(6)    yes
C21 . O3 . 1.471(4)    yes
C21 . H211 . 0.984    no
C21 . H212 . 0.995    no
C22 . H223 . 0.965    no
C22 . H222 . 0.962    no
C22 . H221 . 0.970    no
C23 . C24 . 1.395(5)    yes
C23 . C28 . 1.398(5)    yes
C23 . B1 . 1.644(5)    yes
C24 . C25 . 1.380(5)    yes
C24 . H241 . 0.962    no
C25 . C26 . 1.384(5)    yes
C26 . C27 . 1.382(5)    yes
C26 . H261 . 0.954    no
C27 . C28 . 1.387(5)    yes
C28 . H281 . 0.963    no
C29 . C30 . 1.408(5)    yes
C29 . C34 . 1.396(5)    yes
C29 . B1 . 1.634(5)    yes
C30 . C31 . 1.384(5)    yes
C30 . H301 . 0.953    no
C31 . C32 . 1.383(5)    yes
C32 . C33 . 1.370(5)    yes
C32 . H321 . 0.955    no
C33 . C34 . 1.390(5)    yes
C34 . H341 . 0.951    no
C35 . C36 . 1.402(5)    yes
C35 . C40 . 1.402(5)    yes
C35 . B1 . 1.634(5)    yes
C36 . C37 . 1.383(5)    yes
C36 . H361 . 0.951    no
C37 . C38 . 1.375(5)    yes
C38 . C39 . 1.383(5)    yes
C38 . H381 . 0.956    no
C39 . C40 . 1.381(5)    yes
C40 . H401 . 0.941    no
C41 . C42 . 1.392(5)    yes
C41 . C46 . 1.409(5)    yes
C41 . B1 . 1.652(5)    yes
C42 . C43 . 1.388(5)    yes
C42 . H421 . 0.975    no
C43 . C44 . 1.381(6)    yes
C44 . C45 . 1.376(6)    yes
C44 . H441 . 0.938    no
C45 . C46 . 1.385(5)    yes
C46 . H461 . 0.971    no
Ir1 . P1 . 2.6966(9)    yes
Ir1 . O1 . 2.142(2)    yes
Ir1 . N1 . 1.989(3)    yes
P1 . O1 . 1.523(2)    yes
P1 . N1 . 1.612(3)    yes
P1 . O3 . 1.549(3)    yes
P1 . O2 . 1.558(3)    yes
loop_
 _geom_angle_atom_site_label_1
 _geom_angle_site_symmetry_1
 _geom_angle_atom_site_label_2
 _geom_angle_site_symmetry_2
 _geom_angle_atom_site_label_3
 _geom_angle_site_symmetry_3
 _geom_angle
 _geom_angle_publ_flag
C2 . C1 . C5 . 107.1(3)    yes
C2 . C1 . C6 . 127.1(4)    yes
C5 . C1 . C6 . 125.8(4)    yes
C2 . C1 . Ir1 . 70.41(18)    yes
C5 . C1 . Ir1 . 70.27(19)    yes
C6 . C1 . Ir1 . 125.6(3)    yes
C1 . C2 . C3 . 108.4(3)    yes
C1 . C2 . C7 . 124.8(3)    yes
C3 . C2 . C7 . 126.8(3)    yes
C1 . C2 . Ir1 . 69.91(19)    yes
C3 . C2 . Ir1 . 71.42(18)    yes
C7 . C2 . Ir1 . 125.5(3)    yes
C2 . C3 . C4 . 108.5(3)    yes
C2 . C3 . C8 . 126.5(3)    yes
C4 . C3 . C8 . 125.0(3)    yes
C2 . C3 . Ir1 . 70.04(19)    yes
C4 . C3 . Ir1 . 70.6(2)    yes
C8 . C3 . Ir1 . 124.9(2)    yes
C3 . C4 . C5 . 108.0(3)    yes
C3 . C4 . C9 . 127.4(3)    yes
C5 . C4 . C9 . 124.5(4)    yes
C3 . C4 . Ir1 . 71.1(2)    yes
C5 . C4 . Ir1 . 69.3(2)    yes
C9 . C4 . Ir1 . 126.7(3)    yes
C4 . C5 . C1 . 108.0(3)    yes
C4 . C5 . C10 . 126.3(4)    yes
C1 . C5 . C10 . 125.6(3)    yes
C4 . C5 . Ir1 . 71.1(2)    yes
C1 . C5 . Ir1 . 70.7(2)    yes
C10 . C5 . Ir1 . 125.6(3)    yes
C1 . C6 . H61 . 111.9    no
C1 . C6 . H62 . 110.2    no
H61 . C6 . H62 . 108.3    no
C1 . C6 . H63 . 108.5    no
H61 . C6 . H63 . 108.2    no
H62 . C6 . H63 . 109.6    no
C2 . C7 . H73 . 112.1    no
C2 . C7 . H72 . 110.1    no
H73 . C7 . H72 . 108.2    no
C2 . C7 . H71 . 110.3    no
H73 . C7 . H71 . 108.0    no
H72 . C7 . H71 . 108.1    no
C3 . C8 . H83 . 110.7    no
C3 . C8 . H82 . 112.6    no
H83 . C8 . H82 . 108.6    no
C3 . C8 . H81 . 109.7    no
H83 . C8 . H81 . 107.0    no
H82 . C8 . H81 . 108.0    no
C4 . C9 . H91 . 111.6    no
C4 . C9 . H92 . 109.7    no
H91 . C9 . H92 . 108.6    no
C4 . C9 . H93 . 109.9    no
H91 . C9 . H93 . 107.8    no
H92 . C9 . H93 . 109.2    no
C5 . C10 . H103 . 111.7    no
C5 . C10 . H102 . 109.9    no
H103 . C10 . H102 . 107.7    no
C5 . C10 . H101 . 110.7    no
H103 . C10 . H101 . 108.6    no
H102 . C10 . H101 . 108.2    no
C12 . C11 . C16 . 121.8(3)    yes
C12 . C11 . N1 . 119.2(3)    yes
C16 . C11 . N1 . 118.9(3)    yes
C11 . C12 . C13 . 117.6(4)    yes
C11 . C12 . C17 . 121.9(3)    yes
C13 . C12 . C17 . 120.5(4)    yes
C12 . C13 . C14 . 121.0(4)    yes
C12 . C13 . H131 . 118.8    no
C14 . C13 . H131 . 120.3    no
C13 . C14 . C15 . 121.0(4)    yes
C13 . C14 . H141 . 119.6    no
C15 . C14 . H141 . 119.3    no
C14 . C15 . C16 . 120.0(4)    yes
C14 . C15 . H151 . 121.2    no
C16 . C15 . H151 . 118.8    no
C15 . C16 . C11 . 118.5(4)    yes
C15 . C16 . C18 . 120.0(4)    yes
C11 . C16 . C18 . 121.5(3)    yes
C12 . C17 . H173 . 110.5    no
C12 . C17 . H172 . 110.3    no
H173 . C17 . H172 . 107.8    no
C12 . C17 . H171 . 111.7    no
H173 . C17 . H171 . 108.6    no
H172 . C17 . H171 . 107.8    no
C16 . C18 . H181 . 110.5    no
C16 . C18 . H182 . 110.5    no
H181 . C18 . H182 . 109.1    no
C16 . C18 . H183 . 110.8    no
H181 . C18 . H183 . 109.5    no
H182 . C18 . H183 . 106.4    no
C20 . C19 . O2 . 108.6(3)    yes
C20 . C19 . H191 . 111.7    no
O2 . C19 . H191 . 110.0    no
C20 . C19 . H192 . 111.1    no
O2 . C19 . H192 . 107.5    no
H191 . C19 . H192 . 107.8    no
C19 . C20 . H203 . 109.3    no
C19 . C20 . H202 . 110.6    no
H203 . C20 . H202 . 108.5    no
C19 . C20 . H201 . 110.2    no
H203 . C20 . H201 . 108.5    no
H202 . C20 . H201 . 109.6    no
C22 . C21 . O3 . 107.7(3)    yes
C22 . C21 . H211 . 112.2    no
O3 . C21 . H211 . 109.5    no
C22 . C21 . H212 . 110.5    no
O3 . C21 . H212 . 108.5    no
H211 . C21 . H212 . 108.3    no
C21 . C22 . H223 . 110.4    no
C21 . C22 . H222 . 110.5    no
H223 . C22 . H222 . 109.2    no
C21 . C22 . H221 . 110.0    no
H223 . C22 . H221 . 107.8    no
H222 . C22 . H221 . 109.0    no
C24 . C23 . C28 . 116.5(3)    yes
C24 . C23 . B1 . 120.1(3)    yes
C28 . C23 . B1 . 123.3(3)    yes
C23 . C24 . C25 . 121.7(3)    yes
C23 . C24 . H241 . 119.0    no
C25 . C24 . H241 . 119.4    no
Cl1 . C25 . C24 . 119.2(3)    yes
Cl1 . C25 . C26 . 118.8(3)    yes
C24 . C25 . C26 . 121.9(4)    yes
C25 . C26 . C27 . 116.6(4)    yes
C25 . C26 . H261 . 121.5    no
C27 . C26 . H261 . 121.8    no
Cl2 . C27 . C26 . 118.8(3)    yes
Cl2 . C27 . C28 . 118.9(3)    yes
C26 . C27 . C28 . 122.3(4)    yes
C23 . C28 . C27 . 121.0(3)    yes
C23 . C28 . H281 . 120.4    no
C27 . C28 . H281 . 118.7    no
C30 . C29 . C34 . 115.8(3)    yes
C30 . C29 . B1 . 121.0(3)    yes
C34 . C29 . B1 . 123.1(3)    yes
C29 . C30 . C31 . 121.4(3)    yes
C29 . C30 . H301 . 119.2    no
C31 . C30 . H301 . 119.4    no
Cl3 . C31 . C30 . 118.6(3)    yes
Cl3 . C31 . C32 . 119.4(3)    yes
C30 . C31 . C32 . 122.0(3)    yes
C31 . C32 . C33 . 116.9(3)    yes
C31 . C32 . H321 . 121.3    no
C33 . C32 . H321 . 121.9    no
Cl4 . C33 . C32 . 118.7(3)    yes
Cl4 . C33 . C34 . 118.9(3)    yes
C32 . C33 . C34 . 122.3(3)    yes
C29 . C34 . C33 . 121.4(3)    yes
C29 . C34 . H341 . 119.7    no
C33 . C34 . H341 . 118.8    no
C36 . C35 . C40 . 116.7(3)    yes
C36 . C35 . B1 . 121.5(3)    yes
C40 . C35 . B1 . 121.6(3)    yes
C35 . C36 . C37 . 120.3(4)    yes
C35 . C36 . H361 . 120.2    no
C37 . C36 . H361 . 119.6    no
Cl5 . C37 . C36 . 118.9(3)    yes
Cl5 . C37 . C38 . 117.9(3)    yes
C36 . C37 . C38 . 123.1(4)    yes
C37 . C38 . C39 . 116.6(3)    yes
C37 . C38 . H381 . 122.4    no
C39 . C38 . H381 . 120.9    no
Cl6 . C39 . C38 . 118.7(3)    yes
Cl6 . C39 . C40 . 119.3(3)    yes
C38 . C39 . C40 . 121.9(4)    yes
C35 . C40 . C39 . 121.3(3)    yes
C35 . C40 . H401 . 119.3    no
C39 . C40 . H401 . 119.4    no
C42 . C41 . C46 . 116.6(3)    yes
C42 . C41 . B1 . 121.4(3)    yes
C46 . C41 . B1 . 121.7(3)    yes
C41 . C42 . C43 . 121.4(4)    yes
C41 . C42 . H421 . 119.2    no
C43 . C42 . H421 . 119.4    no
Cl7 . C43 . C42 . 119.6(3)    yes
Cl7 . C43 . C44 . 118.6(3)    yes
C42 . C43 . C44 . 121.9(4)    yes
C43 . C44 . C45 . 117.1(3)    yes
C43 . C44 . H441 . 120.7    no
C45 . C44 . H441 . 122.2    no
Cl8 . C45 . C44 . 118.7(3)    yes
Cl8 . C45 . C46 . 119.0(3)    yes
C44 . C45 . C46 . 122.4(4)    yes
C41 . C46 . C45 . 120.7(4)    yes
C41 . C46 . H461 . 120.9    no
C45 . C46 . H461 . 118.4    no
C3 . Ir1 . C4 . 38.29(13)    yes
C3 . Ir1 . C2 . 38.54(12)    yes
C4 . Ir1 . C2 . 64.74(14)    yes
C3 . Ir1 . C1 . 65.67(12)    yes
C4 . Ir1 . C1 . 65.68(14)    yes
C2 . Ir1 . C1 . 39.69(13)    yes
C3 . Ir1 . C5 . 65.41(13)    yes
C4 . Ir1 . C5 . 39.55(13)    yes
C2 . Ir1 . C5 . 65.59(14)    yes
C1 . Ir1 . C5 . 39.04(15)    yes
C3 . Ir1 . P1 . 142.56(8)    yes
C4 . Ir1 . P1 . 144.13(10)    yes
C2 . Ir1 . P1 . 144.81(10)    yes
C1 . Ir1 . P1 . 147.67(10)    yes
C5 . Ir1 . P1 . 147.34(11)    yes
C3 . Ir1 . O1 . 108.60(10)    yes
C4 . Ir1 . O1 . 118.90(11)    yes
C2 . Ir1 . O1 . 127.59(11)    yes
C1 . Ir1 . O1 . 165.47(13)    yes
C5 . Ir1 . O1 . 152.69(13)    yes
C3 . Ir1 . N1 . 172.83(12)    yes
C4 . Ir1 . N1 . 148.50(13)    yes
C2 . Ir1 . N1 . 136.05(13)    yes
C1 . Ir1 . N1 . 113.11(12)    yes
C5 . Ir1 . N1 . 118.53(12)    yes
P1 . Ir1 . O1 . 34.33(6)    yes
P1 . Ir1 . N1 . 36.46(8)    yes
O1 . Ir1 . N1 . 70.78(10)    yes
Ir1 . P1 . O1 . 52.48(9)    yes
Ir1 . P1 . N1 . 47.15(11)    yes
O1 . P1 . N1 . 99.62(14)    yes
Ir1 . P1 . O3 . 127.07(10)    yes
O1 . P1 . O3 . 117.06(15)    yes
N1 . P1 . O3 . 108.60(14)    yes
Ir1 . P1 . O2 . 129.55(11)    yes
O1 . P1 . O2 . 111.88(14)    yes
N1 . P1 . O2 . 117.18(15)    yes
O3 . P1 . O2 . 103.14(14)    yes
Ir1 . O1 . P1 . 93.19(11)    yes
C11 . N1 . Ir1 . 132.8(2)    yes
C11 . N1 . P1 . 130.7(2)    yes
Ir1 . N1 . P1 . 96.39(14)    yes
C21 . O3 . P1 . 122.9(2)    yes
C19 . O2 . P1 . 122.7(2)    yes
C41 . B1 . C23 . 110.5(3)    yes
C41 . B1 . C29 . 111.9(3)    yes
C23 . B1 . C29 . 104.6(3)    yes
C41 . B1 . C35 . 103.9(3)    yes
C23 . B1 . C35 . 113.5(3)    yes
C29 . B1 . C35 . 112.6(3)    yes


_iucr_refine_instructions_details_constraints
;
#
# Punched on 20/09/14 at 14:33:06
#
#LIST     12                                                                    
BLOCK SCALE X'S, U'S 
RIDE C   (   6,X'S) H   (  61,X'S) H   (  62,X'S) H   (  63,X'S) 
RIDE C   (   7,X'S) H   (  73,X'S) H   (  72,X'S) H   (  71,X'S) 
RIDE C   (   8,X'S) H   (  83,X'S) H   (  82,X'S) H   (  81,X'S) 
RIDE C   (   9,X'S) H   (  91,X'S) H   (  92,X'S) H   (  93,X'S) 
RIDE C   (  10,X'S) H   ( 103,X'S) H   ( 102,X'S) H   ( 101,X'S) 
RIDE C   (  13,X'S) H   ( 131,X'S) 
RIDE C   (  14,X'S) H   ( 141,X'S) 
RIDE C   (  15,X'S) H   ( 151,X'S) 
RIDE C   (  17,X'S) H   ( 173,X'S) H   ( 172,X'S) H   ( 171,X'S) 
RIDE C   (  18,X'S) H   ( 181,X'S) H   ( 182,X'S) H   ( 183,X'S) 
RIDE C   (  19,X'S) H   ( 191,X'S) H   ( 192,X'S) 
RIDE C   (  20,X'S) H   ( 203,X'S) H   ( 202,X'S) H   ( 201,X'S) 
RIDE C   (  21,X'S) H   ( 211,X'S) H   ( 212,X'S) 
RIDE C   (  22,X'S) H   ( 223,X'S) H   ( 222,X'S) H   ( 221,X'S) 
RIDE C   (  24,X'S) H   ( 241,X'S) 
RIDE C   (  26,X'S) H   ( 261,X'S) 
RIDE C   (  28,X'S) H   ( 281,X'S) 
RIDE C   (  30,X'S) H   ( 301,X'S) 
RIDE C   (  32,X'S) H   ( 321,X'S) 
RIDE C   (  34,X'S) H   ( 341,X'S) 
RIDE C   (  36,X'S) H   ( 361,X'S) 
RIDE C   (  38,X'S) H   ( 381,X'S) 
RIDE C   (  40,X'S) H   ( 401,X'S) 
RIDE C   (  42,X'S) H   ( 421,X'S) 
RIDE C   (  44,X'S) H   ( 441,X'S) 
RIDE C   (  46,X'S) H   ( 461,X'S) 
END                                                                             
;


_iucr_refine_instructions_details_restraints
;
#
# Punched on 20/09/14 at 14:33:06
#
#LIST     16                                                                    
NO 
REM   HREST   START (DO NOT REMOVE THIS LINE) 
REM   HREST   END (DO NOT REMOVE THIS LINE) 
END                                                                             
;

#===END

data_11BARF

#--------------------------------- 
# [Ir2Cp*2H3][BArF4] 
#--------------------------------- 

_oxford_structure_analysis_title  'HCJ_020b At 9:18 on 8/ 9'
_chemical_name_systematic         '[Ir2Cp*2H3][BArF4]'
_chemical_melting_point           '.'


_refine_special_details 
; 

The structure was refined anisotropically. Rotational disorder of one of
 the CF3 groups in the anion was treated by modelling the
fluorine atoms over two sites and restraining their geometry. 

The hydrogen atoms were found on the Fourier map and refined before adding
RIDE restraints. Hydrides bridging the two Ir centres, while implicated
by other spectroscopic techniques, could not be reliably located/refined.

;

_cell_length_a                    10.8290(2)
_cell_length_b                    12.6902(2)
_cell_length_c                    19.9820(4)
_cell_angle_alpha                 91.0343(7)
_cell_angle_beta                  97.3543(7)
_cell_angle_gamma                 98.1876(8)
_cell_volume                      2693.78(9)
 
_symmetry_cell_setting            'triclinic' 
_symmetry_space_group_name_H-M    'P -1 ' 
_symmetry_space_group_name_Hall   '-P 1' 
loop_
 _symmetry_equiv_pos_as_xyz
 'x,y,z'
 '-x,-y,-z'

loop_
_atom_type_symbol
_atom_type_scat_dispersion_real
_atom_type_scat_dispersion_imag
_atom_type_scat_Cromer_Mann_a1
_atom_type_scat_Cromer_Mann_b1
_atom_type_scat_Cromer_Mann_a2
_atom_type_scat_Cromer_Mann_b2
_atom_type_scat_Cromer_Mann_a3
_atom_type_scat_Cromer_Mann_b3
_atom_type_scat_Cromer_Mann_a4
_atom_type_scat_Cromer_Mann_b4
_atom_type_scat_Cromer_Mann_c
_atom_type_scat_source  
 Ir     -1.4442   7.9887  27.3049   1.5928  16.7296   8.8655  15.6115   0.4179
   5.8338  45.0011  11.4722 'International Tables Vol C 4.2.6.8 and 6.1.1.4'
 C       0.0033   0.0016   2.3100  20.8439   1.0200  10.2075   1.5886   0.5687
   0.8650  51.6512   0.2156 'International Tables Vol C 4.2.6.8 and 6.1.1.4'
 B       0.0013   0.0007   2.0545  23.2185   1.3326   1.0210   1.0979  60.3498
   0.7068   0.1403  -0.1932 'International Tables Vol C 4.2.6.8 and 6.1.1.4'
 F       0.0171   0.0103   3.5392  10.2825   2.6412   4.2944   1.5170   0.2615
   1.0243  26.1476   0.2776 'International Tables Vol C 4.2.6.8 and 6.1.1.4'
 H       0.0000   0.0000   0.4930  10.5109   0.3229  26.1257   0.1402   3.1424
   0.0408  57.7998   0.0030 'International Tables Vol C 4.2.6.8 and 6.1.1.4'
 
 
_cell_formula_units_Z                    2

# Given Formula = C42 H42 B1 F24 Ir1 
# Dc =      1.49 Fooo =   1458.00 Mu =     25.88 M =   1205.78
# Found Formula = C52 H42 B1 F24 Ir2 
# Dc =      1.87 FOOO =   1458.00 Mu =     50.54 M =   1518.11

_chemical_formula_sum             'C52 H42 B1 F24 Ir2'
_chemical_formula_moiety          'C32 H12 B F24, C20 H30 Ir2'
_chemical_compound_source                ?
_chemical_formula_weight           1518.11
 
 
_cell_measurement_reflns_used        11577
_cell_measurement_theta_min              5
_cell_measurement_theta_max             27
_cell_measurement_temperature          150
 
_exptl_crystal_description        'block' 
_exptl_crystal_colour             'yellow' 
_exptl_crystal_size_min           0.080 
_exptl_crystal_size_mid           0.080 
_exptl_crystal_size_max           0.100 
 
_exptl_crystal_density_diffrn     1.872 
_exptl_crystal_density_meas       ? 
_exptl_crystal_density_method     'not measured' 
# Non-dispersive F(000): 
_exptl_crystal_F_000              1458 
_exptl_absorpt_coefficient_mu     5.054 
 
# Sheldrick geometric approximatio 0.67 0.67 
_exptl_absorpt_correction_type    multi-scan 
_exptl_absorpt_process_details    'DENZO/SCALEPACK (Otwinowski & Minor, 1997)' 
_exptl_absorpt_correction_T_min   0.8607 
_exptl_absorpt_correction_T_max   1 
# For a Kappa CCD, set Tmin to 1.0 and 
# Tmax to the ratio of max:min frame scales in scale_all.log 
_diffrn_measurement_device_type   'Nonius KappaCCD' 
_diffrn_measurement_device        'Area' 
_diffrn_radiation_monochromator   'graphite' 
_diffrn_radiation_type            'Mo K\a'
_diffrn_radiation_wavelength           0.71073
_diffrn_measurement_method        \w 
 
# If a reference occurs more than once, delete the author 
# and date from subsequent references. 
_computing_data_collection        'COLLECT (Nonius, 2001).' 
_computing_cell_refinement        'DENZO/SCALEPACK (Otwinowski & Minor, 1997)' 
_computing_data_reduction         'DENZO/SCALEPACK (Otwinowski & Minor, 1997)' 
_computing_structure_solution     'Superflip (Palatinus & Chapuis, 2007)' 
_computing_structure_refinement   'CRYSTALS (Betteridge et al., 2003)' 
_computing_publication_material   'CRYSTALS (Betteridge et al., 2003)' 
_computing_molecular_graphics     'CAMERON (Watkin et al., 1996)' 
 
_diffrn_standards_interval_time   . 
_diffrn_standards_interval_count  . 
_diffrn_standards_number          0 
_diffrn_standards_decay_%         ? 
 
_diffrn_ambient_temperature        150
_diffrn_reflns_number             46294 
_reflns_number_total              12286 
_diffrn_reflns_av_R_equivalents   0.046 
# Number of reflections without Friedels Law is 21293 
# Number of reflections with Friedels Law is 12286 
# Theoretical number of reflections is about 12402 
 
 
_diffrn_reflns_theta_min          5.148 
_diffrn_reflns_theta_max          27.520 
_diffrn_measured_fraction_theta_max 0.990 
 
_diffrn_reflns_theta_full         26.970 
_diffrn_measured_fraction_theta_full 0.993 
 
 
_diffrn_reflns_limit_h_min        -14 
_diffrn_reflns_limit_h_max        14 
_diffrn_reflns_limit_k_min        -16 
_diffrn_reflns_limit_k_max        16 
_diffrn_reflns_limit_l_min        -25 
_diffrn_reflns_limit_l_max        25 
_reflns_limit_h_min               -14 
_reflns_limit_h_max               13 
_reflns_limit_k_min               -16 
_reflns_limit_k_max               16 
_reflns_limit_l_min               0 
_reflns_limit_l_max               25 
 
_oxford_diffrn_Wilson_B_factor    1.97 
_oxford_diffrn_Wilson_scale       86.26 
 
_atom_sites_solution_primary      Other  #heavy,direct,difmap,geom
# _atom_sites_solution_secondary  difmap
_atom_sites_solution_hydrogens    difmap
 
_refine_diff_density_min          -4.30 
_refine_diff_density_max          4.01 
 
 
# The current dictionary definitions do not cover the 
# situation where the reflections used for refinement were 
# selected by a user-defined sigma threshold 
 
 
# The values actually used during refinement 
_oxford_reflns_threshold_expression_ref     I>-3.0\s(I)
_refine_ls_number_reflns          12286 
_refine_ls_number_restraints      228 
_refine_ls_number_parameters      740 
_oxford_refine_ls_R_factor_ref    0.0778 
_refine_ls_wR_factor_ref          0.0944 
_refine_ls_goodness_of_fit_ref    0.9233 
_refine_ls_shift/su_max           0.0165210 
_refine_ls_shift/su_mean          0.0005373 
 
 
# The values computed with all filters except I/sigma 
_oxford_reflns_number_all         12286 
_refine_ls_R_factor_all           0.0778 
_refine_ls_wR_factor_all          0.0944 
 
# The values computed with a 2 sigma cutoff - a la SHELX 
_reflns_threshold_expression      I>2.0\s(I)
_reflns_number_gt                 8556 
_refine_ls_R_factor_gt            0.0433 
_refine_ls_wR_factor_gt           0.0840 
 
# choose from: rm (reference molecule of known chirality), 
# ad (anomolous dispersion - Flack), rmad (rm and ad), 
# syn (from synthesis), unk (unknown) or . (not applicable). 
_chemical_absolute_configuration  '.' 
 
 
_refine_ls_structure_factor_coef  Fsqd 
_refine_ls_matrix_type            full
_refine_ls_hydrogen_treatment     constr         #undef, noref, refall,
                                                 # refxyz, refU, constr or mixed
_refine_ls_weighting_scheme       calc 
_refine_ls_weighting_details 
;
 Method= Modified Sheldrick 
 w=1/[\s^2^(F^2^) + ( 0.04P)^2^ + 7.73P] 
 ,where P=(max(Fo^2^,0) + 2Fc^2^)/3 
;
# Insert your own references if required - in alphabetical order 
_publ_section_references 
; 
Betteridge, P.W., Carruthers, J.R., Cooper, R.I., 
Prout, K. & Watkin, D.J. (2003). J. Appl. Cryst. 36, 1487. 
 
Nonius (2001). COLLECT. Nonius BV, Delft, The Netherlands. 
 
Otwinowski, Z. & Minor, W. (1997). Methods in Enzymology, Vol. 276, 
edited by C. W. Carter Jr & R. M. Sweet, pp. 307--326. 
New York: Academic Press. 
 
Palatinus, L. & Chapuis, G. (2007). J. Appl. Cryst. 40, 786-790. 
 
Watkin, D.J., Prout, C.K. & Pearce, L.J. (1996). CAMERON, Chemical 
Crystallography Laboratory, Oxford, UK. 
; 

# Uequiv = arithmetic mean of Ui i.e. Ueqiv = (U1+U2+U3)/3

# Replace last . with number of unfound hydrogen atoms attached to an atom.

# ..._refinement_flags_... 
# . no refinement constraints           S special position constraint on site
# G rigid group refinement of site      R riding atom
# D distance or angle restraint on site T thermal displacement constraints
# U Uiso or Uij restraint (rigid bond)  P partial occupancy constraint


loop_
_atom_site_label
_atom_site_type_symbol
_atom_site_fract_x
_atom_site_fract_y
_atom_site_fract_z
_atom_site_U_iso_or_equiv
_atom_site_occupancy
_atom_site_adp_type
_atom_site_refinement_flags_posn
_atom_site_refinement_flags_adp
_atom_site_refinement_flags_occupancy
_atom_site_disorder_assembly
_atom_site_disorder_group
_atom_site_attached_hydrogens
F1 F 1.2104(4) 0.5795(3) 0.1495(2) 0.0513 1.0000 Uani . . . . . . 
F2 F 1.2869(4) 0.6225(4) 0.2505(2) 0.0654 1.0000 Uani . . . . . . 
F3 F 1.3421(4) 0.4899(4) 0.2021(3) 0.0759 1.0000 Uani . . . . . . 
F4 F 1.1023(5) 0.1820(3) 0.3544(3) 0.0736 1.0000 Uani . . . . . . 
F5 F 1.1293(6) 0.1443(4) 0.2535(4) 0.1051 1.0000 Uani . . . . . . 
F6 F 0.9448(4) 0.1264(3) 0.2821(2) 0.0450 1.0000 Uani . . . . . . 
F7 F 0.6592(4) 0.5429(4) -0.0047(2) 0.0607 1.0000 Uani . . . . . . 
F8 F 0.8043(4) 0.4463(3) 0.0016(2) 0.0518 1.0000 Uani . . . . . . 
F9 F 0.6190(5) 0.3831(4) -0.0449(2) 0.0810 1.0000 Uani . . . . . . 
F10 F 0.3678(4) 0.2078(3) 0.1999(3) 0.0681 1.0000 Uani . . . . . . 
F11 F 0.4775(4) 0.1075(3) 0.1545(2) 0.0536 1.0000 Uani . . . . . . 
F12 F 0.3425(4) 0.1808(3) 0.0922(2) 0.0619 1.0000 Uani . . . . . . 
F13 F 0.9480(4) 0.3534(4) 0.5025(2) 0.0707 1.0000 Uani . . . . . . 
F14 F 0.8776(5) 0.4773(5) 0.5547(2) 0.0784 1.0000 Uani . . . . . . 
F15 F 0.7864(5) 0.3179(5) 0.5540(3) 0.0940 1.0000 Uani . . . . . . 
F16 F 0.3800(4) 0.3954(4) 0.4616(2) 0.0537 1.0000 Uani . . . . . . 
F17 F 0.3573(4) 0.3173(3) 0.3640(2) 0.0557 1.0000 Uani . . . . . . 
F18 F 0.3602(4) 0.4860(3) 0.3719(2) 0.0534 1.0000 Uani . . . . . . 
F19 F 0.6415(4) 0.9320(3) 0.1721(3) 0.0721 1.0000 Uani . . . . . . 
F20 F 0.6677(6) 0.8191(5) 0.0973(3) 0.0988 1.0000 Uani . . . . . . 
F21 F 0.5220(4) 0.7846(4) 0.1578(3) 0.0706 1.0000 Uani . . . . . . 
C1 C 0.6368(6) 0.0328(5) 0.3647(3) 0.0351 1.0000 Uani . . . . . . 
C2 C 0.7356(6) 0.0075(5) 0.4135(3) 0.0377 1.0000 Uani . . . . . . 
C3 C 0.7096(6) -0.1037(6) 0.4271(3) 0.0406 1.0000 Uani . . . . . . 
C4 C 0.5952(6) -0.1464(5) 0.3854(3) 0.0380 1.0000 Uani . . . . . . 
C5 C 0.5487(6) -0.0620(5) 0.3476(3) 0.0337 1.0000 Uani . . . . . . 
C6 C 0.6282(8) 0.1388(6) 0.3336(4) 0.0504 1.0000 Uani . . . . . . 
C7 C 0.8475(7) 0.0843(7) 0.4452(4) 0.0629 1.0000 Uani . . . . . . 
C8 C 0.7896(8) -0.1645(7) 0.4738(5) 0.0674 1.0000 Uani . . . . . . 
C9 C 0.5359(9) -0.2622(6) 0.3802(4) 0.0651 1.0000 Uani . . . . . . 
C10 C 0.4327(7) -0.0715(7) 0.2975(4) 0.0566 1.0000 Uani . . . . . . 
C11 C 0.8485(6) 0.1874(4) 0.0478(3) 0.0260 1.0000 Uani . . . . . . 
C12 C 0.9589(6) 0.2475(4) 0.0261(3) 0.0287 1.0000 Uani . . . . . . 
C13 C 0.9473(5) 0.2377(4) -0.0460(3) 0.0251 1.0000 Uani . . . . . . 
C14 C 0.8297(5) 0.1711(4) -0.0693(3) 0.0268 1.0000 Uani . . . . . . 
C15 C 0.7687(5) 0.1415(4) -0.0122(3) 0.0266 1.0000 Uani . . . . . . 
C16 C 0.8223(7) 0.1787(5) 0.1185(3) 0.0385 1.0000 Uani . . . . . . 
C17 C 1.0644(6) 0.3132(5) 0.0708(3) 0.0395 1.0000 Uani . . . . . . 
C18 C 1.0387(6) 0.2895(5) -0.0898(3) 0.0374 1.0000 Uani . . . . . . 
C19 C 0.7767(6) 0.1436(5) -0.1420(3) 0.0369 1.0000 Uani . . . . . . 
C20 C 0.6413(6) 0.0764(5) -0.0125(3) 0.0363 1.0000 Uani . . . . . . 
C21 C 0.9210(5) 0.4480(4) 0.2603(3) 0.0252 1.0000 Uani . . . . . . 
C22 C 1.0260(6) 0.5081(4) 0.2381(3) 0.0263 1.0000 Uani . . . . . . 
C23 C 1.1360(5) 0.4675(5) 0.2333(3) 0.0267 1.0000 Uani . . . . . . 
C24 C 1.1494(5) 0.3633(5) 0.2494(3) 0.0273 1.0000 Uani . . . . . . 
C25 C 1.0457(5) 0.3008(4) 0.2711(3) 0.0261 1.0000 Uani . . . . . . 
C26 C 0.9363(5) 0.3426(4) 0.2760(3) 0.0266 1.0000 Uani . . . . . . 
C27 C 1.2437(6) 0.5386(5) 0.2090(4) 0.0388 1.0000 Uani . . . . . . 
C28 C 1.0565(6) 0.1894(5) 0.2898(4) 0.0391 1.0000 Uani . . . . . . 
C29 C 0.6939(5) 0.4278(4) 0.1967(3) 0.0233 1.0000 Uani . . . . . . 
C30 C 0.7182(5) 0.4566(4) 0.1318(3) 0.0247 1.0000 Uani . . . . . . 
C31 C 0.6492(6) 0.4070(4) 0.0737(3) 0.0275 1.0000 Uani . . . . . . 
C32 C 0.5519(6) 0.3241(4) 0.0769(3) 0.0285 1.0000 Uani . . . . . . 
C33 C 0.5276(5) 0.2921(4) 0.1406(3) 0.0250 1.0000 Uani . . . . . . 
C34 C 0.5977(5) 0.3411(4) 0.1991(3) 0.0260 1.0000 Uani . . . . . . 
C35 C 0.6819(7) 0.4438(5) 0.0065(3) 0.0387 1.0000 Uani . . . . . . 
C36 C 0.4279(6) 0.1990(5) 0.1467(3) 0.0331 1.0000 Uani . . . . . . 
C37 C 0.7298(5) 0.4562(4) 0.3339(3) 0.0243 1.0000 Uani . . . . . . 
C38 C 0.8071(6) 0.4349(5) 0.3930(3) 0.0318 1.0000 Uani . . . . . . 
C39 C 0.7588(6) 0.4071(5) 0.4520(3) 0.0315 1.0000 Uani . . . . . . 
C40 C 0.6294(6) 0.3973(5) 0.4561(3) 0.0318 1.0000 Uani . . . . . . 
C41 C 0.5528(6) 0.4205(5) 0.3996(3) 0.0289 1.0000 Uani . . . . . . 
C42 C 0.6020(6) 0.4510(4) 0.3404(3) 0.0277 1.0000 Uani . . . . . . 
C43 C 0.8430(7) 0.3893(7) 0.5151(4) 0.0526 1.0000 Uani . . . . . . 
C44 C 0.4143(6) 0.4055(5) 0.3996(3) 0.0370 1.0000 Uani . . . . . . 
C45 C 0.7950(5) 0.6182(4) 0.2574(3) 0.0253 1.0000 Uani . . . . . . 
C46 C 0.8943(6) 0.6841(4) 0.2969(3) 0.0294 1.0000 Uani . . . . . . 
C47 C 0.9108(4) 0.7953(4) 0.2902(2) 0.0348 1.0000 Uani D . . . . . 
C48 C 0.8297(6) 0.8436(5) 0.2471(3) 0.0351 1.0000 Uani . . . . . . 
C49 C 0.7290(6) 0.7801(5) 0.2102(3) 0.0308 1.0000 Uani . . . . . . 
C50 C 0.7121(6) 0.6692(5) 0.2151(3) 0.0303 1.0000 Uani . . . . . . 
C51 C 0.6412(7) 0.8288(6) 0.1600(4) 0.0475 1.0000 Uani . . . . . . 
C52 C 1.0221(3) 0.8631(3) 0.32842(18) 0.0553 1.0000 Uani D . . . . . 
Ir1 Ir 0.94768(2) 0.079745(17) -0.004597(11) 0.0220 1.0000 Uani . . . . . . 
Ir2 Ir 0.55844(2) -0.022679(19) 0.454279(12) 0.0312 1.0000 Uani . . . . . . 
B1 B 0.7836(6) 0.4879(5) 0.2628(3) 0.0242 1.0000 Uani . . . . . . 
F231 F 1.0946(6) 0.8084(4) 0.3679(3) 0.1126 0.757(8) Uani D . P 1 1 . 
F230 F 1.1301(6) 0.8266(8) 0.3234(7) 0.0551 0.243(8) Uani D . P 1 2 . 
F241 F 0.9910(5) 0.9375(4) 0.3688(3) 0.0680 0.757(8) Uani D . P 1 1 . 
F240 F 1.0156(9) 0.8712(10) 0.3937(3) 0.0648 0.243(8) Uani D . P 1 2 . 
F220 F 1.0382(9) 0.9612(6) 0.3082(5) 0.0764 0.243(8) Uani D . P 1 2 . 
F221 F 1.0962(5) 0.9152(5) 0.2892(2) 0.0608 0.757(8) Uani D . P 1 1 . 
H61 H 0.5411 0.1481 0.3242 0.0759 1.0000 Uiso R . . . . . 
H63 H 0.6735 0.1953 0.3637 0.0760 1.0000 Uiso R . . . . . 
H62 H 0.6646 0.1392 0.2920 0.0756 1.0000 Uiso R . . . . . 
H71 H 0.8769 0.0583 0.4881 0.0938 1.0000 Uiso R . . . . . 
H73 H 0.8233 0.1530 0.4507 0.0940 1.0000 Uiso R . . . . . 
H72 H 0.9113 0.0871 0.4159 0.0937 1.0000 Uiso R . . . . . 
H81 H 0.7371 -0.2167 0.4960 0.1010 1.0000 Uiso R . . . . . 
H83 H 0.8409 -0.1165 0.5073 0.1009 1.0000 Uiso R . . . . . 
H82 H 0.8435 -0.2006 0.4491 0.1008 1.0000 Uiso R . . . . . 
H91 H 0.4459 -0.2664 0.3764 0.0980 1.0000 Uiso R . . . . . 
H93 H 0.5650 -0.2966 0.4203 0.0981 1.0000 Uiso R . . . . . 
H92 H 0.5595 -0.2959 0.3411 0.0980 1.0000 Uiso R . . . . . 
H101 H 0.3776 -0.1348 0.3057 0.0848 1.0000 Uiso R . . . . . 
H102 H 0.3897 -0.0108 0.3021 0.0848 1.0000 Uiso R . . . . . 
H103 H 0.4534 -0.0754 0.2523 0.0849 1.0000 Uiso R . . . . . 
H161 H 0.7576 0.1200 0.1216 0.0577 1.0000 Uiso R . . . . . 
H162 H 0.8961 0.1684 0.1471 0.0578 1.0000 Uiso R . . . . . 
H163 H 0.7949 0.2432 0.1326 0.0582 1.0000 Uiso R . . . . . 
H171 H 1.1403 0.3181 0.0502 0.0589 1.0000 Uiso R . . . . . 
H172 H 1.0760 0.2801 0.1132 0.0589 1.0000 Uiso R . . . . . 
H173 H 1.0427 0.3826 0.0776 0.0594 1.0000 Uiso R . . . . . 
H181 H 1.0345 0.2501 -0.1314 0.0559 1.0000 Uiso R . . . . . 
H182 H 1.1234 0.2961 -0.0671 0.0558 1.0000 Uiso R . . . . . 
H183 H 1.0204 0.3598 -0.1001 0.0558 1.0000 Uiso R . . . . . 
H192 H 0.7211 0.0772 -0.1444 0.0552 1.0000 Uiso R . . . . . 
H191 H 0.8431 0.1389 -0.1688 0.0552 1.0000 Uiso R . . . . . 
H193 H 0.7296 0.1988 -0.1587 0.0550 1.0000 Uiso R . . . . . 
H201 H 0.6259 0.0242 -0.0490 0.0539 1.0000 Uiso R . . . . . 
H203 H 0.6345 0.0404 0.0289 0.0539 1.0000 Uiso R . . . . . 
H202 H 0.5766 0.1213 -0.0183 0.0540 1.0000 Uiso R . . . . . 
H221 H 1.0211 0.5776 0.2258 0.0321 1.0000 Uiso R . . . . . 
H241 H 1.2236 0.3371 0.2463 0.0333 1.0000 Uiso R . . . . . 
H261 H 0.8688 0.2986 0.2900 0.0317 1.0000 Uiso R . . . . . 
H301 H 0.7840 0.5111 0.1271 0.0299 1.0000 Uiso R . . . . . 
H321 H 0.5048 0.2917 0.0378 0.0341 1.0000 Uiso R . . . . . 
H341 H 0.5794 0.3163 0.2404 0.0307 1.0000 Uiso R . . . . . 
H381 H 0.8938 0.4393 0.3920 0.0378 1.0000 Uiso R . . . . . 
H401 H 0.5968 0.3757 0.4948 0.0377 1.0000 Uiso R . . . . . 
H421 H 0.5479 0.4696 0.3038 0.0331 1.0000 Uiso R . . . . . 
H461 H 0.9509 0.6540 0.3269 0.0350 1.0000 Uiso R . . . . . 
H481 H 0.8428 0.9176 0.2425 0.0419 1.0000 Uiso R . . . . . 
H501 H 0.6432 0.6285 0.1889 0.0357 1.0000 Uiso R . . . . . 
loop_
_atom_site_aniso_label
_atom_site_aniso_U_11
_atom_site_aniso_U_22
_atom_site_aniso_U_33
_atom_site_aniso_U_23
_atom_site_aniso_U_13
_atom_site_aniso_U_12
F1 0.041(2) 0.069(3) 0.045(2) 0.029(2) 0.0129(19) 0.003(2) 
F2 0.062(3) 0.060(3) 0.064(3) 0.000(2) 0.009(2) -0.030(2) 
F3 0.038(2) 0.061(3) 0.142(5) 0.046(3) 0.045(3) 0.018(2) 
F4 0.071(3) 0.048(3) 0.087(4) 0.037(2) -0.031(3) -0.011(2) 
F5 0.121(5) 0.041(3) 0.188(6) 0.045(3) 0.111(5) 0.043(3) 
F6 0.049(2) 0.0269(19) 0.055(3) 0.0091(17) -0.003(2) -0.0026(18) 
F7 0.070(3) 0.069(3) 0.054(3) 0.039(2) 0.021(2) 0.031(2) 
F8 0.053(3) 0.068(3) 0.041(2) 0.017(2) 0.023(2) 0.013(2) 
F9 0.100(4) 0.099(4) 0.026(2) -0.005(2) 0.009(2) -0.044(3) 
F10 0.058(3) 0.058(3) 0.088(4) -0.021(2) 0.048(3) -0.026(2) 
F11 0.051(3) 0.029(2) 0.078(3) 0.004(2) 0.005(2) -0.0042(19) 
F12 0.043(2) 0.054(3) 0.075(3) 0.012(2) -0.020(2) -0.016(2) 
F13 0.051(3) 0.112(4) 0.054(3) 0.027(3) -0.002(2) 0.034(3) 
F14 0.062(3) 0.118(4) 0.045(3) -0.016(3) -0.019(2) 0.004(3) 
F15 0.063(3) 0.145(5) 0.067(3) 0.075(3) -0.006(3) -0.004(3) 
F16 0.040(2) 0.086(3) 0.036(2) 0.009(2) 0.0159(19) 0.004(2) 
F17 0.033(2) 0.066(3) 0.061(3) -0.011(2) 0.002(2) -0.010(2) 
F18 0.038(2) 0.067(3) 0.060(3) 0.021(2) 0.014(2) 0.017(2) 
F19 0.062(3) 0.035(2) 0.120(4) 0.022(2) -0.006(3) 0.023(2) 
F20 0.118(5) 0.152(5) 0.050(3) 0.039(3) 0.013(3) 0.095(4) 
F21 0.042(3) 0.056(3) 0.110(4) 0.023(3) -0.016(3) 0.015(2) 
C1 0.037(4) 0.044(4) 0.025(3) 0.002(3) 0.013(3) -0.002(3) 
C2 0.032(4) 0.050(4) 0.030(4) 0.006(3) 0.012(3) -0.004(3) 
C3 0.036(4) 0.052(4) 0.038(4) 0.011(3) 0.018(3) 0.007(3) 
C4 0.040(4) 0.043(4) 0.032(4) -0.004(3) 0.018(3) 0.000(3) 
C5 0.039(4) 0.039(4) 0.020(3) -0.003(3) 0.010(3) -0.007(3) 
C6 0.057(5) 0.052(4) 0.043(4) 0.017(3) 0.012(4) 0.004(4) 
C7 0.046(5) 0.085(6) 0.049(5) 0.005(4) 0.008(4) -0.021(4) 
C8 0.052(5) 0.090(7) 0.069(6) 0.038(5) 0.019(4) 0.026(5) 
C9 0.090(7) 0.040(4) 0.067(6) -0.003(4) 0.031(5) -0.002(4) 
C10 0.048(5) 0.084(6) 0.033(4) -0.007(4) 0.000(3) -0.003(4) 
C11 0.029(3) 0.019(3) 0.035(3) 0.000(2) 0.011(3) 0.013(2) 
C12 0.033(3) 0.016(3) 0.037(4) 0.000(2) 0.001(3) 0.004(2) 
C13 0.025(3) 0.017(3) 0.034(3) 0.008(2) 0.003(3) 0.010(2) 
C14 0.027(3) 0.020(3) 0.035(3) 0.004(2) 0.003(3) 0.009(2) 
C15 0.018(3) 0.021(3) 0.041(4) 0.000(3) 0.002(3) 0.006(2) 
C16 0.045(4) 0.031(3) 0.044(4) 0.005(3) 0.014(3) 0.015(3) 
C17 0.040(4) 0.030(3) 0.044(4) -0.003(3) -0.004(3) -0.001(3) 
C18 0.034(4) 0.040(4) 0.039(4) 0.018(3) 0.005(3) 0.005(3) 
C19 0.044(4) 0.035(4) 0.029(4) 0.003(3) -0.007(3) 0.005(3) 
C20 0.031(3) 0.031(3) 0.047(4) 0.000(3) 0.007(3) 0.002(3) 
C21 0.028(3) 0.023(3) 0.024(3) 0.001(2) 0.004(2) 0.001(2) 
C22 0.033(3) 0.023(3) 0.023(3) 0.003(2) 0.003(3) 0.000(3) 
C23 0.025(3) 0.029(3) 0.025(3) 0.003(2) 0.002(2) 0.001(3) 
C24 0.022(3) 0.033(3) 0.028(3) 0.005(3) -0.002(2) 0.008(3) 
C25 0.028(3) 0.024(3) 0.027(3) 0.003(2) 0.006(3) 0.004(3) 
C26 0.026(3) 0.022(3) 0.030(3) 0.007(2) 0.000(3) -0.001(2) 
C27 0.033(4) 0.037(4) 0.048(4) 0.008(3) 0.010(3) 0.007(3) 
C28 0.032(4) 0.036(4) 0.053(5) 0.013(3) 0.015(3) 0.009(3) 
C29 0.022(3) 0.020(3) 0.029(3) 0.004(2) 0.006(2) 0.003(2) 
C30 0.025(3) 0.020(3) 0.029(3) 0.002(2) 0.004(3) 0.003(2) 
C31 0.032(3) 0.026(3) 0.025(3) 0.002(2) 0.006(3) 0.006(3) 
C32 0.028(3) 0.024(3) 0.032(3) -0.008(3) -0.001(3) 0.005(3) 
C33 0.021(3) 0.021(3) 0.035(3) 0.002(2) 0.009(3) 0.005(2) 
C34 0.027(3) 0.024(3) 0.029(3) 0.004(2) 0.006(3) 0.008(2) 
C35 0.046(4) 0.041(4) 0.028(4) 0.006(3) 0.007(3) -0.001(3) 
C36 0.027(3) 0.024(3) 0.047(4) -0.005(3) 0.006(3) 0.001(3) 
C37 0.030(3) 0.015(3) 0.026(3) 0.002(2) 0.001(3) -0.002(2) 
C38 0.031(3) 0.031(3) 0.032(3) 0.007(3) 0.001(3) 0.000(3) 
C39 0.035(4) 0.033(3) 0.027(3) 0.006(3) 0.001(3) 0.005(3) 
C40 0.032(3) 0.037(4) 0.024(3) 0.005(3) 0.004(3) 0.000(3) 
C41 0.031(3) 0.030(3) 0.025(3) -0.001(2) 0.007(3) -0.001(3) 
C42 0.032(3) 0.020(3) 0.029(3) 0.000(2) -0.001(3) -0.001(3) 
C43 0.036(4) 0.081(6) 0.036(4) 0.015(4) -0.003(3) -0.001(4) 
C44 0.030(3) 0.048(4) 0.034(4) 0.005(3) 0.007(3) 0.002(3) 
C45 0.030(3) 0.026(3) 0.020(3) 0.001(2) 0.004(2) 0.001(3) 
C46 0.036(3) 0.027(3) 0.024(3) 0.004(2) 0.001(3) 0.005(3) 
C47 0.039(3) 0.024(3) 0.039(3) 0.006(2) 0.004(3) -0.001(3) 
C48 0.046(4) 0.020(3) 0.041(4) 0.004(3) 0.011(3) 0.007(3) 
C49 0.033(3) 0.027(3) 0.038(4) 0.007(3) 0.014(3) 0.016(3) 
C50 0.029(3) 0.031(3) 0.030(3) 0.005(3) 0.005(3) 0.004(3) 
C51 0.047(5) 0.038(4) 0.062(5) 0.014(4) 0.007(4) 0.021(3) 
C52 0.058(3) 0.039(3) 0.060(3) 0.004(2) -0.008(3) -0.009(3) 
Ir1 0.02169(12) 0.02024(12) 0.02425(13) 0.00097(9) 0.00259(9) 0.00360(9) 
Ir2 0.02983(14) 0.03787(15) 0.02404(14) 0.00183(11) 0.00476(11) -0.00287(11) 
B1 0.025(3) 0.023(3) 0.025(4) 0.007(3) 0.004(3) 0.002(3) 
F231 0.110(5) 0.044(4) 0.146(6) 0.032(4) -0.090(5) -0.024(4) 
F230 0.050(6) 0.061(7) 0.046(7) 0.007(6) 0.009(6) -0.027(6) 
F241 0.085(4) 0.055(4) 0.058(4) -0.024(3) 0.018(3) -0.017(3) 
F240 0.065(8) 0.063(8) 0.056(6) -0.001(7) -0.009(7) -0.011(7) 
F220 0.084(8) 0.040(6) 0.089(8) 0.015(7) -0.019(8) -0.019(7) 
F221 0.039(3) 0.074(4) 0.064(4) -0.005(3) 0.015(3) -0.017(3) 

_refine_ls_extinction_method 
    'None'
_oxford_refine_ls_scale 0.083226(13) 
loop_
 _geom_bond_atom_site_label_1
 _geom_bond_site_symmetry_1
 _geom_bond_atom_site_label_2
 _geom_bond_site_symmetry_2
 _geom_bond_distance
 _geom_bond_publ_flag
F1 . C27 . 1.335(7)    yes
F2 . C27 . 1.329(8)    yes
F3 . C27 . 1.325(8)    yes
F4 . C28 . 1.333(8)    yes
F5 . C28 . 1.317(8)    yes
F6 . C28 . 1.341(7)    yes
F7 . C35 . 1.334(8)    yes
F8 . C35 . 1.337(8)    yes
F9 . C35 . 1.326(8)    yes
F10 . C36 . 1.326(8)    yes
F11 . C36 . 1.350(7)    yes
F12 . C36 . 1.330(7)    yes
F13 . C43 . 1.335(9)    yes
F14 . C43 . 1.337(9)    yes
F15 . C43 . 1.338(8)    yes
F16 . C44 . 1.342(7)    yes
F17 . C44 . 1.342(7)    yes
F18 . C44 . 1.342(8)    yes
F19 . C51 . 1.326(8)    yes
F20 . C51 . 1.328(9)    yes
F21 . C51 . 1.328(8)    yes
C1 . C2 . 1.428(9)    yes
C1 . C5 . 1.431(8)    yes
C1 . C6 . 1.502(9)    yes
C1 . Ir2 . 2.164(6)    yes
C2 . C3 . 1.437(9)    yes
C2 . C7 . 1.505(9)    yes
C2 . Ir2 . 2.166(6)    yes
C3 . C4 . 1.432(9)    yes
C3 . C8 . 1.491(10)    yes
C3 . Ir2 . 2.173(7)    yes
C4 . C5 . 1.433(9)    yes
C4 . C9 . 1.514(9)    yes
C4 . Ir2 . 2.181(6)    yes
C5 . C10 . 1.493(9)    yes
C5 . Ir2 . 2.166(6)    yes
C6 . H61 . 0.963    no
C6 . H63 . 0.962    no
C6 . H62 . 0.964    no
C7 . H71 . 0.957    no
C7 . H73 . 0.955    no
C7 . H72 . 0.957    no
C8 . H81 . 0.964    no
C8 . H83 . 0.960    no
C8 . H82 . 0.969    no
C9 . H91 . 0.961    no
C9 . H93 . 0.958    no
C9 . H92 . 0.964    no
C10 . H101 . 0.960    no
C10 . H102 . 0.964    no
C10 . H103 . 0.961    no
C11 . C12 . 1.443(8)    yes
C11 . C15 . 1.445(8)    yes
C11 . C16 . 1.479(9)    yes
C11 . Ir1 . 2.184(6)    yes
C12 . C13 . 1.433(8)    yes
C12 . C17 . 1.497(8)    yes
C12 . Ir1 . 2.187(5)    yes
C13 . C14 . 1.443(8)    yes
C13 . C18 . 1.494(8)    yes
C13 . Ir1 . 2.183(5)    yes
C14 . C15 . 1.421(8)    yes
C14 . C19 . 1.507(8)    yes
C14 . Ir1 . 2.169(6)    yes
C15 . C20 . 1.503(8)    yes
C15 . Ir1 . 2.181(6)    yes
C16 . H161 . 0.956    no
C16 . H162 . 0.947    no
C16 . H163 . 0.959    no
C17 . H171 . 0.961    no
C17 . H172 . 0.953    no
C17 . H173 . 0.955    no
C18 . H181 . 0.956    no
C18 . H182 . 0.961    no
C18 . H183 . 0.961    no
C19 . H192 . 0.960    no
C19 . H191 . 0.957    no
C19 . H193 . 0.964    no
C20 . H201 . 0.959    no
C20 . H203 . 0.958    no
C20 . H202 . 0.961    no
C21 . C22 . 1.403(8)    yes
C21 . C26 . 1.406(8)    yes
C21 . B1 . 1.645(9)    yes
C22 . C23 . 1.377(8)    yes
C22 . H221 . 0.926    no
C23 . C24 . 1.390(8)    yes
C23 . C27 . 1.507(8)    yes
C24 . C25 . 1.400(8)    yes
C24 . H241 . 0.921    no
C25 . C26 . 1.379(8)    yes
C25 . C28 . 1.486(8)    yes
C26 . H261 . 0.931    no
C29 . C30 . 1.400(8)    yes
C29 . C34 . 1.409(7)    yes
C29 . B1 . 1.642(9)    yes
C30 . C31 . 1.386(8)    yes
C30 . H301 . 0.935    no
C31 . C32 . 1.388(8)    yes
C31 . C35 . 1.496(8)    yes
C32 . C33 . 1.388(8)    yes
C32 . H321 . 0.932    no
C33 . C34 . 1.394(8)    yes
C33 . C36 . 1.501(8)    yes
C34 . H341 . 0.923    no
C37 . C38 . 1.411(8)    yes
C37 . C42 . 1.399(8)    yes
C37 . B1 . 1.638(8)    yes
C38 . C39 . 1.381(8)    yes
C38 . H381 . 0.936    no
C39 . C40 . 1.403(9)    yes
C39 . C43 . 1.498(9)    yes
C40 . C41 . 1.374(8)    yes
C40 . H401 . 0.922    no
C41 . C42 . 1.397(8)    yes
C41 . C44 . 1.485(9)    yes
C42 . H421 . 0.932    no
C45 . C46 . 1.407(8)    yes
C45 . C50 . 1.389(8)    yes
C45 . B1 . 1.647(8)    yes
C46 . C47 . 1.408(7)    yes
C46 . H461 . 0.929    no
C47 . C48 . 1.366(8)    yes
C47 . C52 . 1.490(4)    yes
C48 . C49 . 1.381(9)    yes
C48 . H481 . 0.938    no
C49 . C50 . 1.401(8)    yes
C49 . C51 . 1.495(9)    yes
C50 . H501 . 0.937    no
C52 . F231 . 1.318(5)    yes
C52 . F241 . 1.338(4)    yes
C52 . F221 . 1.314(4)    yes
C52 . F230 . 1.332(6)    yes
C52 . F240 . 1.318(6)    yes
C52 . F220 . 1.312(6)    yes
Ir1 . Ir1 2_755 2.4551(4)    yes
Ir2 . Ir2 2_656 2.4564(5)    yes
loop_
 _geom_angle_atom_site_label_1
 _geom_angle_site_symmetry_1
 _geom_angle_atom_site_label_2
 _geom_angle_site_symmetry_2
 _geom_angle_atom_site_label_3
 _geom_angle_site_symmetry_3
 _geom_angle
 _geom_angle_publ_flag
C2 . C1 . C5 . 108.3(6)    yes
C2 . C1 . C6 . 126.5(6)    yes
C5 . C1 . C6 . 125.1(6)    yes
C2 . C1 . Ir2 . 70.8(3)    yes
C5 . C1 . Ir2 . 70.8(3)    yes
C6 . C1 . Ir2 . 126.3(5)    yes
C1 . C2 . C3 . 108.3(6)    yes
C1 . C2 . C7 . 125.8(6)    yes
C3 . C2 . C7 . 125.9(7)    yes
C1 . C2 . Ir2 . 70.7(3)    yes
C3 . C2 . Ir2 . 70.9(3)    yes
C7 . C2 . Ir2 . 124.2(5)    yes
C2 . C3 . C4 . 107.2(6)    yes
C2 . C3 . C8 . 126.4(7)    yes
C4 . C3 . C8 . 126.3(7)    yes
C2 . C3 . Ir2 . 70.4(4)    yes
C4 . C3 . Ir2 . 71.1(4)    yes
C8 . C3 . Ir2 . 125.5(5)    yes
C3 . C4 . C5 . 108.7(6)    yes
C3 . C4 . C9 . 125.5(7)    yes
C5 . C4 . C9 . 125.7(7)    yes
C3 . C4 . Ir2 . 70.5(4)    yes
C5 . C4 . Ir2 . 70.2(4)    yes
C9 . C4 . Ir2 . 127.0(5)    yes
C4 . C5 . C1 . 107.4(6)    yes
C4 . C5 . C10 . 126.6(6)    yes
C1 . C5 . C10 . 125.9(6)    yes
C4 . C5 . Ir2 . 71.3(3)    yes
C1 . C5 . Ir2 . 70.6(3)    yes
C10 . C5 . Ir2 . 125.2(5)    yes
C1 . C6 . H61 . 109.2    no
C1 . C6 . H63 . 110.3    no
H61 . C6 . H63 . 110.0    no
C1 . C6 . H62 . 108.2    no
H61 . C6 . H62 . 109.5    no
H63 . C6 . H62 . 109.6    no
C2 . C7 . H71 . 108.2    no
C2 . C7 . H73 . 109.5    no
H71 . C7 . H73 . 110.3    no
C2 . C7 . H72 . 108.0    no
H71 . C7 . H72 . 110.3    no
H73 . C7 . H72 . 110.4    no
C3 . C8 . H81 . 110.0    no
C3 . C8 . H83 . 109.7    no
H81 . C8 . H83 . 108.9    no
C3 . C8 . H82 . 110.5    no
H81 . C8 . H82 . 108.8    no
H83 . C8 . H82 . 109.0    no
C4 . C9 . H91 . 109.3    no
C4 . C9 . H93 . 109.0    no
H91 . C9 . H93 . 109.0    no
C4 . C9 . H92 . 109.0    no
H91 . C9 . H92 . 110.3    no
H93 . C9 . H92 . 110.1    no
C5 . C10 . H101 . 108.9    no
C5 . C10 . H102 . 110.3    no
H101 . C10 . H102 . 108.8    no
C5 . C10 . H103 . 110.6    no
H101 . C10 . H103 . 109.5    no
H102 . C10 . H103 . 108.8    no
C12 . C11 . C15 . 107.2(5)    yes
C12 . C11 . C16 . 125.4(6)    yes
C15 . C11 . C16 . 127.4(5)    yes
C12 . C11 . Ir1 . 70.8(3)    yes
C15 . C11 . Ir1 . 70.5(3)    yes
C16 . C11 . Ir1 . 125.4(4)    yes
C11 . C12 . C13 . 108.3(5)    yes
C11 . C12 . C17 . 126.0(6)    yes
C13 . C12 . C17 . 125.6(5)    yes
C11 . C12 . Ir1 . 70.6(3)    yes
C13 . C12 . Ir1 . 70.7(3)    yes
C17 . C12 . Ir1 . 126.7(4)    yes
C12 . C13 . C14 . 107.8(5)    yes
C12 . C13 . C18 . 126.4(5)    yes
C14 . C13 . C18 . 125.8(5)    yes
C12 . C13 . Ir1 . 71.0(3)    yes
C14 . C13 . Ir1 . 70.1(3)    yes
C18 . C13 . Ir1 . 125.6(4)    yes
C13 . C14 . C15 . 108.2(5)    yes
C13 . C14 . C19 . 125.9(5)    yes
C15 . C14 . C19 . 125.8(5)    yes
C13 . C14 . Ir1 . 71.2(3)    yes
C15 . C14 . Ir1 . 71.4(3)    yes
C19 . C14 . Ir1 . 126.1(4)    yes
C11 . C15 . C14 . 108.5(5)    yes
C11 . C15 . C20 . 124.6(5)    yes
C14 . C15 . C20 . 126.9(5)    yes
C11 . C15 . Ir1 . 70.8(3)    yes
C14 . C15 . Ir1 . 70.5(3)    yes
C20 . C15 . Ir1 . 125.9(4)    yes
C11 . C16 . H161 . 109.6    no
C11 . C16 . H162 . 110.1    no
H161 . C16 . H162 . 109.5    no
C11 . C16 . H163 . 109.1    no
H161 . C16 . H163 . 109.4    no
H162 . C16 . H163 . 109.1    no
C12 . C17 . H171 . 109.8    no
C12 . C17 . H172 . 108.8    no
H171 . C17 . H172 . 109.8    no
C12 . C17 . H173 . 108.8    no
H171 . C17 . H173 . 110.1    no
H172 . C17 . H173 . 109.5    no
C13 . C18 . H181 . 111.8    no
C13 . C18 . H182 . 110.8    no
H181 . C18 . H182 . 108.4    no
C13 . C18 . H183 . 109.7    no
H181 . C18 . H183 . 108.0    no
H182 . C18 . H183 . 108.1    no
C14 . C19 . H192 . 109.1    no
C14 . C19 . H191 . 110.5    no
H192 . C19 . H191 . 110.5    no
C14 . C19 . H193 . 108.5    no
H192 . C19 . H193 . 109.0    no
H191 . C19 . H193 . 109.2    no
C15 . C20 . H201 . 109.9    no
C15 . C20 . H203 . 111.8    no
H201 . C20 . H203 . 108.5    no
C15 . C20 . H202 . 110.4    no
H201 . C20 . H202 . 108.3    no
H203 . C20 . H202 . 107.8    no
C22 . C21 . C26 . 114.7(5)    yes
C22 . C21 . B1 . 125.3(5)    yes
C26 . C21 . B1 . 119.7(5)    yes
C21 . C22 . C23 . 122.4(5)    yes
C21 . C22 . H221 . 118.9    no
C23 . C22 . H221 . 118.7    no
C22 . C23 . C24 . 121.9(5)    yes
C22 . C23 . C27 . 118.5(5)    yes
C24 . C23 . C27 . 119.6(6)    yes
C23 . C24 . C25 . 117.0(5)    yes
C23 . C24 . H241 . 121.2    no
C25 . C24 . H241 . 121.8    no
C24 . C25 . C26 . 120.5(5)    yes
C24 . C25 . C28 . 118.8(5)    yes
C26 . C25 . C28 . 120.7(5)    yes
C21 . C26 . C25 . 123.4(5)    yes
C21 . C26 . H261 . 118.3    no
C25 . C26 . H261 . 118.3    no
C23 . C27 . F1 . 112.3(5)    yes
C23 . C27 . F2 . 112.6(6)    yes
F1 . C27 . F2 . 104.9(5)    yes
C23 . C27 . F3 . 113.7(5)    yes
F1 . C27 . F3 . 106.7(6)    yes
F2 . C27 . F3 . 106.1(6)    yes
C25 . C28 . F6 . 112.5(5)    yes
C25 . C28 . F4 . 112.7(6)    yes
F6 . C28 . F4 . 104.7(5)    yes
C25 . C28 . F5 . 112.7(5)    yes
F6 . C28 . F5 . 106.6(6)    yes
F4 . C28 . F5 . 107.0(6)    yes
C30 . C29 . C34 . 115.3(5)    yes
C30 . C29 . B1 . 119.5(5)    yes
C34 . C29 . B1 . 125.0(5)    yes
C29 . C30 . C31 . 122.8(5)    yes
C29 . C30 . H301 . 119.2    no
C31 . C30 . H301 . 118.0    no
C30 . C31 . C32 . 121.2(5)    yes
C30 . C31 . C35 . 118.9(5)    yes
C32 . C31 . C35 . 120.0(5)    yes
C31 . C32 . C33 . 117.4(5)    yes
C31 . C32 . H321 . 121.0    no
C33 . C32 . H321 . 121.7    no
C32 . C33 . C34 . 121.5(5)    yes
C32 . C33 . C36 . 119.4(5)    yes
C34 . C33 . C36 . 119.0(5)    yes
C29 . C34 . C33 . 121.8(5)    yes
C29 . C34 . H341 . 119.6    no
C33 . C34 . H341 . 118.6    no
C31 . C35 . F8 . 112.4(6)    yes
C31 . C35 . F7 . 112.2(6)    yes
F8 . C35 . F7 . 105.0(5)    yes
C31 . C35 . F9 . 113.2(5)    yes
F8 . C35 . F9 . 106.8(6)    yes
F7 . C35 . F9 . 106.7(6)    yes
C33 . C36 . F11 . 111.5(5)    yes
C33 . C36 . F12 . 113.2(5)    yes
F11 . C36 . F12 . 104.9(5)    yes
C33 . C36 . F10 . 113.3(5)    yes
F11 . C36 . F10 . 105.2(5)    yes
F12 . C36 . F10 . 108.1(5)    yes
C38 . C37 . C42 . 115.0(5)    yes
C38 . C37 . B1 . 123.5(5)    yes
C42 . C37 . B1 . 121.5(5)    yes
C37 . C38 . C39 . 122.2(6)    yes
C37 . C38 . H381 . 118.8    no
C39 . C38 . H381 . 119.0    no
C38 . C39 . C40 . 121.5(6)    yes
C38 . C39 . C43 . 121.4(6)    yes
C40 . C39 . C43 . 117.1(6)    yes
C39 . C40 . C41 . 117.2(5)    yes
C39 . C40 . H401 . 121.5    no
C41 . C40 . H401 . 121.3    no
C40 . C41 . C42 . 121.2(6)    yes
C40 . C41 . C44 . 119.6(5)    yes
C42 . C41 . C44 . 119.0(5)    yes
C37 . C42 . C41 . 122.7(6)    yes
C37 . C42 . H421 . 118.4    no
C41 . C42 . H421 . 118.9    no
C39 . C43 . F15 . 112.2(6)    yes
C39 . C43 . F14 . 112.9(7)    yes
F15 . C43 . F14 . 104.9(7)    yes
C39 . C43 . F13 . 112.8(6)    yes
F15 . C43 . F13 . 106.4(7)    yes
F14 . C43 . F13 . 107.2(6)    yes
C41 . C44 . F17 . 111.9(6)    yes
C41 . C44 . F16 . 113.2(5)    yes
F17 . C44 . F16 . 105.9(5)    yes
C41 . C44 . F18 . 112.9(5)    yes
F17 . C44 . F18 . 105.7(5)    yes
F16 . C44 . F18 . 106.6(6)    yes
C46 . C45 . C50 . 116.5(5)    yes
C46 . C45 . B1 . 119.5(5)    yes
C50 . C45 . B1 . 123.9(5)    yes
C45 . C46 . C47 . 120.7(5)    yes
C45 . C46 . H461 . 119.8    no
C47 . C46 . H461 . 119.5    no
C46 . C47 . C48 . 121.7(5)    yes
C46 . C47 . C52 . 120.0(4)    yes
C48 . C47 . C52 . 118.2(4)    yes
C47 . C48 . C49 . 118.1(5)    yes
C47 . C48 . H481 . 120.9    no
C49 . C48 . H481 . 121.1    no
C48 . C49 . C50 . 121.1(6)    yes
C48 . C49 . C51 . 120.0(6)    yes
C50 . C49 . C51 . 118.8(6)    yes
C49 . C50 . C45 . 121.8(6)    yes
C49 . C50 . H501 . 118.9    no
C45 . C50 . H501 . 119.4    no
C49 . C51 . F20 . 112.5(6)    yes
C49 . C51 . F21 . 113.2(6)    yes
F20 . C51 . F21 . 105.3(7)    yes
C49 . C51 . F19 . 113.6(6)    yes
F20 . C51 . F19 . 106.3(6)    yes
F21 . C51 . F19 . 105.3(6)    yes
C47 . C52 . F231 . 113.23(5)    yes
C47 . C52 . F241 . 113.17(5)    yes
F231 . C52 . F241 . 105.51(5)    yes
C47 . C52 . F221 . 113.21(5)    yes
F231 . C52 . F221 . 105.56(5)    yes
F241 . C52 . F221 . 105.41(5)    yes
C47 . C52 . F230 . 113.14(5)    yes
C47 . C52 . F240 . 113.22(5)    yes
F230 . C52 . F240 . 105.48(5)    yes
C47 . C52 . F220 . 113.23(5)    yes
F230 . C52 . F220 . 105.50(5)    yes
F240 . C52 . F220 . 105.53(5)    yes
C15 . Ir1 . C13 . 64.2(2)    yes
C15 . Ir1 . C11 . 38.7(2)    yes
C13 . Ir1 . C11 . 64.5(2)    yes
C15 . Ir1 . C12 . 64.3(2)    yes
C13 . Ir1 . C12 . 38.3(2)    yes
C11 . Ir1 . C12 . 38.6(2)    yes
C15 . Ir1 . C14 . 38.1(2)    yes
C13 . Ir1 . C14 . 38.7(2)    yes
C11 . Ir1 . C14 . 64.6(2)    yes
C12 . Ir1 . C14 . 64.5(2)    yes
C15 . Ir1 . Ir1 2_755 145.95(14)    yes
C13 . Ir1 . Ir1 2_755 146.23(15)    yes
C11 . Ir1 . Ir1 2_755 145.36(15)    yes
C12 . Ir1 . Ir1 2_755 145.84(16)    yes
C14 . Ir1 . Ir1 2_755 146.14(16)    yes
C4 . Ir2 . C3 . 38.4(3)    yes
C4 . Ir2 . C5 . 38.5(2)    yes
C3 . Ir2 . C5 . 64.9(3)    yes
C4 . Ir2 . C2 . 64.2(2)    yes
C3 . Ir2 . C2 . 38.7(2)    yes
C5 . Ir2 . C2 . 64.7(2)    yes
C4 . Ir2 . C1 . 64.2(2)    yes
C3 . Ir2 . C1 . 64.7(3)    yes
C5 . Ir2 . C1 . 38.6(2)    yes
C2 . Ir2 . C1 . 38.5(2)    yes
C4 . Ir2 . Ir2 2_656 146.89(16)    yes
C3 . Ir2 . Ir2 2_656 145.70(18)    yes
C5 . Ir2 . Ir2 2_656 146.02(18)    yes
C2 . Ir2 . Ir2 2_656 145.20(18)    yes
C1 . Ir2 . Ir2 2_656 145.40(18)    yes
C45 . B1 . C21 . 110.9(5)    yes
C45 . B1 . C29 . 110.6(5)    yes
C21 . B1 . C29 . 104.3(5)    yes
C45 . B1 . C37 . 107.7(5)    yes
C21 . B1 . C37 . 110.7(5)    yes
C29 . B1 . C37 . 112.6(5)    yes


_iucr_refine_instructions_details_constraints
;
#
# Punched on 25/02/15 at 10:16:26
#
#LIST     12                                                                    
BLOCK SCALE X'S, U'S 
EQUIV PART(1001,OCC) PART(1002,OCC) 
WEIGHT -1 PART(1002,OCC) 
RIDE C   (   6,X'S) H   (  61,X'S) H   (  63,X'S) H   (  62,X'S) 
RIDE C   (   7,X'S) H   (  71,X'S) H   (  73,X'S) H   (  72,X'S) 
RIDE C   (   8,X'S) H   (  81,X'S) H   (  83,X'S) H   (  82,X'S) 
RIDE C   (   9,X'S) H   (  91,X'S) H   (  93,X'S) H   (  92,X'S) 
RIDE C   (  10,X'S) H   ( 101,X'S) H   ( 102,X'S) H   ( 103,X'S) 
RIDE C   (  16,X'S) H   ( 161,X'S) H   ( 162,X'S) H   ( 163,X'S) 
RIDE C   (  17,X'S) H   ( 171,X'S) H   ( 172,X'S) H   ( 173,X'S) 
RIDE C   (  18,X'S) H   ( 181,X'S) H   ( 182,X'S) H   ( 183,X'S) 
RIDE C   (  19,X'S) H   ( 192,X'S) H   ( 191,X'S) H   ( 193,X'S) 
RIDE C   (  20,X'S) H   ( 201,X'S) H   ( 203,X'S) H   ( 202,X'S) 
RIDE C   (  22,X'S) H   ( 221,X'S) 
RIDE C   (  24,X'S) H   ( 241,X'S) 
RIDE C   (  26,X'S) H   ( 261,X'S) 
RIDE C   (  30,X'S) H   ( 301,X'S) 
RIDE C   (  32,X'S) H   ( 321,X'S) 
RIDE C   (  34,X'S) H   ( 341,X'S) 
RIDE C   (  38,X'S) H   ( 381,X'S) 
RIDE C   (  40,X'S) H   ( 401,X'S) 
RIDE C   (  42,X'S) H   ( 421,X'S) 
RIDE C   (  46,X'S) H   ( 461,X'S) 
RIDE C   (  48,X'S) H   ( 481,X'S) 
RIDE C   (  50,X'S) H   ( 501,X'S) 
END                                                                             
;


_iucr_refine_instructions_details_restraints
;
#
# Punched on 25/02/15 at 10:16:26
#
#LIST     16                                                                    
NO 
REM   HREST   START (DO NOT REMOVE THIS LINE) 
SAME C(47) C(52) F(220) F(230) F(240) AND 
CONT C(47) C(52) F(230) F(240) F(220) AND 
CONT C(47) C(52) F(240) F(220) F(230) AND 
CONT C(47) C(52) F(221) F(231) F(241) AND 
CONT C(47) C(52) F(231) F(241) F(221) AND 
CONT C(47) C(52) F(241) F(221) F(231) 
DELU 0.015 C(47) C(52) F(220) F(230) F(240) AND 
CONT C(47) C(52) F(230) F(240) F(220) AND 
CONT C(47) C(52) F(240) F(220) F(230) AND 
CONT C(47) C(52) F(221) F(231) F(241) AND 
CONT C(47) C(52) F(231) F(241) F(221) AND 
CONT C(47) C(52) F(241) F(221) F(231) 
SIMU 0.015 C(47) C(52) F(220) F(230) F(240) AND 
CONT C(47) C(52) F(230) F(240) F(220) AND 
CONT C(47) C(52) F(240) F(220) F(230) AND 
CONT C(47) C(52) F(221) F(231) F(241) AND 
CONT C(47) C(52) F(231) F(241) F(221) AND 
CONT C(47) C(52) F(241) F(221) F(231) 
REM   HREST   END (DO NOT REMOVE THIS LINE) 
END                                                                             
;

#===END

data_9BARF
_audit_creation_date              2015-05-27
_audit_creation_method
;
Olex2 1.2
(compiled 2015.01.26 svn.r3150 for OlexSys, GUI svn.r4998)
;
_publ_contact_author_address      ?
_publ_contact_author_email        ?
_publ_contact_author_name         ''
_publ_contact_author_phone        ?
_publ_section_references
;
Burla, M.C., Caliandro, R., Camalli, M., Carrozzini, B., Cascarano, G.L.,
 De Caro, L., Giacovazzo, C., Polidori, G., Siliqi, D., Spagna, R.
 (2007). J. Appl. Cryst. 40, 609-613.

Dolomanov, O.V., Bourhis, L.J., Gildea, R.J, Howard, J.A.K. & Puschmann, H.
 (2009), J. Appl. Cryst. 42, 339-341.

Sheldrick, G.M. (2008). Acta Cryst. A64, 112-122.
;
_chemical_name_common             ?
_chemical_name_systematic         ?
_chemical_formula_moiety          'C34 H44 Ir N O3 P Si, C32 H12 B F24'
_chemical_formula_sum             'C66 H56 B F24 Ir N O3 P Si'
_chemical_formula_weight          1629.18
_chemical_melting_point           ?
loop_
  _atom_type_symbol
  _atom_type_description
  _atom_type_scat_dispersion_real
  _atom_type_scat_dispersion_imag
  _atom_type_scat_source
 'C' 'C' 0.0033 0.0016 'International Tables Vol C Tables 4.2.6.8 and 6.1.1.4'
 'H' 'H' 0.0000 0.0000 'International Tables Vol C Tables 4.2.6.8 and 6.1.1.4'
 'B' 'B' 0.0013 0.0007 'International Tables Vol C Tables 4.2.6.8 and 6.1.1.4'
 'F' 'F' 0.0171 0.0103 'International Tables Vol C Tables 4.2.6.8 and 6.1.1.4'
 'Ir' 'Ir' -1.4442 7.9887
 'International Tables Vol C Tables 4.2.6.8 and 6.1.1.4'
 'N' 'N' 0.0061 0.0033 'International Tables Vol C Tables 4.2.6.8 and 6.1.1.4'
 'O' 'O' 0.0106 0.0060 'International Tables Vol C Tables 4.2.6.8 and 6.1.1.4'
 'P' 'P' 0.1023 0.0942 'International Tables Vol C Tables 4.2.6.8 and 6.1.1.4'
 'Si' 'Si' 0.0817 0.0704 'International Tables Vol C Tables 4.2.6.8 and 6.1.1.4'

_shelx_space_group_comment
;
The symmetry employed for this shelxl refinement is uniquely defined
by the following loop, which should always be used as a source of
symmetry information in preference to the above space-group names.
They are only intended as comments.
;
_space_group_crystal_system       'triclinic'
_space_group_IT_number            2
_space_group_name_H-M_alt         'P -1'
_space_group_name_Hall            '-P 1'
loop_
  _space_group_symop_operation_xyz
 'x, y, z'
 '-x, -y, -z'

_cell_length_a                    12.3952(19)
_cell_length_b                    15.021(2)
_cell_length_c                    18.869(3)
_cell_angle_alpha                 71.324(3)
_cell_angle_beta                  80.182(3)
_cell_angle_gamma                 84.966(3)
_cell_volume                      3277.3(9)
_cell_formula_units_Z             2
_cell_measurement_reflns_used     9329
_cell_measurement_temperature     90.0
_cell_measurement_theta_max       30.56
_cell_measurement_theta_min       2.31
_shelx_estimated_absorpt_T_max    ?
_shelx_estimated_absorpt_T_min    ?
_exptl_absorpt_coefficient_mu     2.195
_exptl_absorpt_correction_T_max   0.7356
_exptl_absorpt_correction_T_min   0.5930
_exptl_absorpt_correction_type    multi-scan
_exptl_absorpt_process_details
;
SADABS-2014/5 (Bruker,2014/5) was used for absorption correction.
wR2(int) was 0.0563 before and 0.0363 after correction.
The Ratio of minimum to maximum transmission is 0.8062.
The \l/2 correction factor is 0.00150.
;
_exptl_absorpt_special_details    ?
_exptl_crystal_colour             'clear green'
_exptl_crystal_colour_lustre      clear
_exptl_crystal_colour_primary     green
_exptl_crystal_density_diffrn     1.651
_exptl_crystal_density_meas       ?
_exptl_crystal_density_method     ?
_exptl_crystal_description        plate
_exptl_crystal_F_000              1620
_exptl_crystal_preparation        ?
_exptl_crystal_size_max           0.42
_exptl_crystal_size_mid           0.23
_exptl_crystal_size_min           0.14
_exptl_transmission_factor_max    ?
_exptl_transmission_factor_min    ?
_diffrn_reflns_av_R_equivalents   0.0272
_diffrn_reflns_av_unetI/netI      0.0263
_diffrn_reflns_Laue_measured_fraction_full 0.996
_diffrn_reflns_Laue_measured_fraction_max 0.992
_diffrn_reflns_limit_h_max        17
_diffrn_reflns_limit_h_min        -17
_diffrn_reflns_limit_k_max        19
_diffrn_reflns_limit_k_min        -21
_diffrn_reflns_limit_l_max        26
_diffrn_reflns_limit_l_min        -26
_diffrn_reflns_number             75509
_diffrn_reflns_point_group_measured_fraction_full 0.996
_diffrn_reflns_point_group_measured_fraction_max 0.992
_diffrn_reflns_theta_full         26.000
_diffrn_reflns_theta_max          30.623
_diffrn_reflns_theta_min          1.432
_diffrn_ambient_temperature       90.0
_diffrn_detector                  'Bruker APEX2 area detector'
_diffrn_detector_area_resol_mean  7.9
_diffrn_detector_type             'Bruker-Nonius APEXII CCD area detector'
_diffrn_measured_fraction_theta_full 0.996
_diffrn_measured_fraction_theta_max 0.992
_diffrn_measurement_device
'Bruker-Nonius APEXII CCD area detector and D8 diffractometer'
_diffrn_measurement_device_type   'Bruker APEX-II CCD'
_diffrn_measurement_method        '\w and \f scans'
_diffrn_radiation_monochromator   'TRIUMPH curved-crystal'
_diffrn_radiation_probe           X-ray
_diffrn_radiation_type            MoK\a
_diffrn_radiation_wavelength      0.71073
_diffrn_source                    'sealed X-ray tube'
_diffrn_standards_number          0
_reflns_Friedel_coverage          0.000
_reflns_Friedel_fraction_full     .
_reflns_Friedel_fraction_max      .
_reflns_number_gt                 18372
_reflns_number_total              20042
_reflns_special_details
;
 Reflections were merged by SHELXL according to the crystal
 class for the calculation of statistics and refinement.
 
 _reflns_Friedel_fraction is defined as the number of unique
 Friedel pairs measured divided by the number that would be
 possible theoretically, ignoring centric projections and
 systematic absences.
;
_reflns_threshold_expression      'I > 2\s(I)'
_computing_cell_refinement        'SAINT v8.34A (Bruker, 2013)'
_computing_data_collection        ?
_computing_data_reduction         'SAINT v8.34A (Bruker, 2013)'
_computing_molecular_graphics     'Olex2 (Dolomanov et al., 2009)'
_computing_publication_material   'Olex2 (Dolomanov et al., 2009)'
_computing_structure_refinement   'XL (Sheldrick, 2008)'
_computing_structure_solution     'SIR2004 (Burla et al., 2007)'
_refine_diff_density_max          4.001
_refine_diff_density_min          -1.340
_refine_diff_density_rms          0.142
_refine_ls_extinction_coef        .
_refine_ls_extinction_method      none
_refine_ls_goodness_of_fit_ref    1.103
_refine_ls_hydrogen_treatment     constr
_refine_ls_matrix_type            full
_refine_ls_number_parameters      904
_refine_ls_number_reflns          20042
_refine_ls_number_restraints      927
_refine_ls_R_factor_all           0.0438
_refine_ls_R_factor_gt            0.0380
_refine_ls_restrained_S_all       1.102
_refine_ls_shift/su_max           0.006
_refine_ls_shift/su_mean          0.000
_refine_ls_structure_factor_coef  Fsqd
_refine_ls_weighting_details
'w=1/[\s^2^(Fo^2^)+(0.0377P)^2^+12.0255P] where P=(Fo^2^+2Fc^2^)/3'
_refine_ls_weighting_scheme       calc
_refine_ls_wR_factor_gt           0.0927
_refine_ls_wR_factor_ref          0.0966
_refine_special_details           ?
_olex2_refinement_description
;
1. Fixed Uiso
 At 1.2 times of:
  All C(H) groups, All C(H,H) groups
 At 1.5 times of:
  All C(H,H,H) groups
2. Restrained distances
 F10-F11 \\sim F11-F12 \\sim F12-F10 \\sim F10A-F11A \\sim F11A-F12A \\sim
F12A-F10A
 with sigma of 0.01
 C45-F10 \\sim C45-F11 \\sim C45-F12 \\sim C45-F10A \\sim C45-F11A \\sim
C45-F12A
 with sigma of 0.005
3. Uiso/Uaniso restraints and constraints
Uanis(F10) = Uanis(F10A)
Uanis(F11) = Uanis(F11A)
Uanis(F12) = Uanis(F12A)
4. Rigid body (RIGU) restrains
 All non-hydrogen atoms
 with sigma for 1-2 distances of 0.004 and sigma for 1-3 distances of 0.004
5. Others
 Sof(F12A)=1-FVAR(1)
 Sof(F12)=FVAR(1)
 Sof(F10A)=1-FVAR(2)
 Sof(F10)=FVAR(2)
 Sof(F11A)=1-FVAR(3)
 Sof(F11)=FVAR(3)
6.a Secondary CH2 refined with riding coordinates:
 C9(H9A,H9B), C11(H11A,H11B)
6.b Aromatic/amide H refined with riding coordinates:
 C3(H3), C4(H4), C5(H5), C24(H24), C25(H25), C26(H26), C27(H27), C28(H28),
 C30(H30), C31(H31), C32(H32), C33(H33), C34(H34), C36(H36), C38(H38), C40(H40),
  C44(H44), C46(H46), C48(H48), C52(H52), C54(H54), C56(H56), C60(H60),
 C62(H62), C64(H64)
6.c Idealised Me refined as rotating group:
 C7(H7A,H7B,H7C), C8(H8A,H8B,H8C), C10(H10A,H10B,H10C), C12(H12A,H12B,H12C),
 C18(H18A,H18B,H18C), C19(H19A,H19B,H19C), C20(H20A,H20B,H20C), C21(H21A,H21B,
 H21C), C22(H22A,H22B,H22C)
;
_atom_sites_solution_hydrogens    geom
_atom_sites_solution_primary      direct
_atom_sites_solution_secondary    ?
loop_
  _atom_site_label
  _atom_site_type_symbol
  _atom_site_fract_x
  _atom_site_fract_y
  _atom_site_fract_z
  _atom_site_U_iso_or_equiv
  _atom_site_adp_type
  _atom_site_occupancy
  _atom_site_site_symmetry_order
  _atom_site_calc_flag
  _atom_site_refinement_flags_posn
  _atom_site_refinement_flags_adp
  _atom_site_refinement_flags_occupancy
  _atom_site_disorder_assembly
  _atom_site_disorder_group
 Ir1 Ir 0.44008(2) 1.04898(2) 0.25566(2) 0.01230(3) Uani 1 1 d . U . . .
 P1 P 0.66530(6) 0.99178(5) 0.16957(4) 0.01266(13) Uani 1 1 d . U . . .
 Si1 Si 0.44010(6) 0.97485(6) 0.16369(5) 0.01355(14) Uani 1 1 d . U . . .
 O1 O 0.58039(17) 0.96845(16) 0.12860(12) 0.0158(4) Uani 1 1 d . U . . .
 O2 O 0.72866(17) 0.89936(15) 0.20913(13) 0.0163(4) Uani 1 1 d . U . . .
 O3 O 0.75597(17) 1.05316(16) 0.11333(13) 0.0180(4) Uani 1 1 d . U . . .
 N1 N 0.6022(2) 1.04892(17) 0.22573(14) 0.0131(4) Uani 1 1 d . U . . .
 C1 C 0.6660(2) 1.1031(2) 0.25252(18) 0.0159(5) Uani 1 1 d . U . . .
 C2 C 0.6791(3) 1.1999(2) 0.2105(2) 0.0225(6) Uani 1 1 d . U . . .
 C3 C 0.7358(3) 1.2537(3) 0.2389(3) 0.0332(8) Uani 1 1 d . U . . .
 H3 H 0.7442 1.3172 0.2127 0.040 Uiso 1 1 calc R . . . .
 C4 C 0.7800(3) 1.2147(3) 0.3052(3) 0.0378(9) Uani 1 1 d . U . . .
 H4 H 0.8174 1.2521 0.3231 0.045 Uiso 1 1 calc R . . . .
 C5 C 0.7688(3) 1.1201(3) 0.3449(2) 0.0317(8) Uani 1 1 d . U . . .
 H5 H 0.8001 1.0942 0.3888 0.038 Uiso 1 1 calc R . . . .
 C6 C 0.7105(3) 1.0628(3) 0.31963(19) 0.0217(6) Uani 1 1 d . U . . .
 C7 C 0.6980(3) 0.9606(3) 0.36400(19) 0.0258(7) Uani 1 1 d . U . . .
 H7A H 0.6248 0.9430 0.3657 0.039 Uiso 1 1 calc GR . . . .
 H7B H 0.7121 0.9501 0.4146 0.039 Uiso 1 1 calc GR . . . .
 H7C H 0.7493 0.9233 0.3401 0.039 Uiso 1 1 calc GR . . . .
 C8 C 0.6337(3) 1.2440(2) 0.1376(2) 0.0273(7) Uani 1 1 d . U . . .
 H8A H 0.6797 1.2260 0.0977 0.041 Uiso 1 1 calc GR . . . .
 H8B H 0.6315 1.3112 0.1255 0.041 Uiso 1 1 calc GR . . . .
 H8C H 0.5610 1.2229 0.1431 0.041 Uiso 1 1 calc GR . . . .
 C9 C 0.6709(3) 0.8125(2) 0.2489(2) 0.0211(6) Uani 1 1 d . U . . .
 H9A H 0.6342 0.7944 0.2145 0.025 Uiso 1 1 calc R . . . .
 H9B H 0.6164 0.8213 0.2898 0.025 Uiso 1 1 calc R . . . .
 C10 C 0.7556(3) 0.7370(2) 0.2803(2) 0.0299(8) Uani 1 1 d . U . . .
 H10A H 0.8070 0.7268 0.2392 0.045 Uiso 1 1 calc GR . . . .
 H10B H 0.7195 0.6796 0.3089 0.045 Uiso 1 1 calc GR . . . .
 H10C H 0.7936 0.7570 0.3125 0.045 Uiso 1 1 calc GR . . . .
 C11 C 0.8744(2) 1.0308(3) 0.10532(19) 0.0216(6) Uani 1 1 d . U . . .
 H11A H 0.9098 1.0716 0.0575 0.026 Uiso 1 1 calc R . . . .
 H11B H 0.8871 0.9664 0.1047 0.026 Uiso 1 1 calc R . . . .
 C12 C 0.9244(3) 1.0428(3) 0.1689(2) 0.0239(6) Uani 1 1 d . U . . .
 H12A H 1.0027 1.0363 0.1582 0.036 Uiso 1 1 calc GR . . . .
 H12B H 0.8981 0.9956 0.2153 0.036 Uiso 1 1 calc GR . . . .
 H12C H 0.9044 1.1040 0.1736 0.036 Uiso 1 1 calc GR . . . .
 C13 C 0.3636(3) 1.1709(2) 0.29689(17) 0.0162(5) Uani 1 1 d . U . . .
 C14 C 0.3849(3) 1.0965(2) 0.36087(17) 0.0179(5) Uani 1 1 d . U . . .
 C15 C 0.3294(3) 1.0145(2) 0.36174(17) 0.0180(5) Uani 1 1 d . U . . .
 C16 C 0.2655(2) 1.0427(2) 0.29986(19) 0.0180(5) Uani 1 1 d . U . . .
 C17 C 0.2925(2) 1.1370(2) 0.25695(17) 0.0165(5) Uani 1 1 d . U . . .
 C18 C 0.2446(3) 1.1979(2) 0.1892(2) 0.0241(7) Uani 1 1 d . U . . .
 H18A H 0.3010 1.2344 0.1530 0.036 Uiso 1 1 calc GR . . . .
 H18B H 0.1885 1.2393 0.2044 0.036 Uiso 1 1 calc GR . . . .
 H18C H 0.2134 1.1591 0.1668 0.036 Uiso 1 1 calc GR . . . .
 C19 C 0.4025(3) 1.2689(2) 0.2723(2) 0.0237(6) Uani 1 1 d . U . . .
 H19A H 0.4670 1.2697 0.2939 0.036 Uiso 1 1 calc GR . . . .
 H19B H 0.3461 1.3089 0.2890 0.036 Uiso 1 1 calc GR . . . .
 H19C H 0.4193 1.2912 0.2181 0.036 Uiso 1 1 calc GR . . . .
 C20 C 0.4537(3) 1.0989(3) 0.4178(2) 0.0278(7) Uani 1 1 d . U . . .
 H20A H 0.4913 1.0391 0.4351 0.042 Uiso 1 1 calc GR . . . .
 H20B H 0.4078 1.1121 0.4600 0.042 Uiso 1 1 calc GR . . . .
 H20C H 0.5063 1.1471 0.3950 0.042 Uiso 1 1 calc GR . . . .
 C21 C 0.3270(3) 0.9216(2) 0.4214(2) 0.0302(8) Uani 1 1 d . U . . .
 H21A H 0.2965 0.8765 0.4048 0.045 Uiso 1 1 calc GR . . . .
 H21B H 0.2828 0.9269 0.4670 0.045 Uiso 1 1 calc GR . . . .
 H21C H 0.4002 0.9013 0.4311 0.045 Uiso 1 1 calc GR . . . .
 C22 C 0.1835(3) 0.9850(3) 0.2851(2) 0.0287(7) Uani 1 1 d . U . . .
 H22A H 0.1740 1.0087 0.2328 0.043 Uiso 1 1 calc GR . . . .
 H22B H 0.1146 0.9889 0.3164 0.043 Uiso 1 1 calc GR . . . .
 H22C H 0.2096 0.9206 0.2968 0.043 Uiso 1 1 calc GR . . . .
 C23 C 0.3793(2) 1.0535(2) 0.08056(18) 0.0168(5) Uani 1 1 d . U . . .
 C24 C 0.4281(3) 1.1375(2) 0.03604(19) 0.0216(6) Uani 1 1 d . U . . .
 H24 H 0.4972 1.1495 0.0432 0.026 Uiso 1 1 calc R . . . .
 C25 C 0.3755(3) 1.2039(3) -0.01904(19) 0.0249(7) Uani 1 1 d . U . . .
 H25 H 0.4099 1.2590 -0.0487 0.030 Uiso 1 1 calc R . . . .
 C26 C 0.2711(3) 1.1872(3) -0.0294(2) 0.0250(7) Uani 1 1 d . U . . .
 H26 H 0.2350 1.2316 -0.0653 0.030 Uiso 1 1 calc R . . . .
 C27 C 0.2217(3) 1.1039(3) 0.0143(2) 0.0231(6) Uani 1 1 d . U . . .
 H27 H 0.1524 1.0922 0.0074 0.028 Uiso 1 1 calc R . . . .
 C28 C 0.2752(3) 1.0375(2) 0.06851(19) 0.0200(6) Uani 1 1 d . U . . .
 H28 H 0.2413 0.9817 0.0971 0.024 Uiso 1 1 calc R . . . .
 C29 C 0.3950(2) 0.8515(2) 0.19011(18) 0.0170(5) Uani 1 1 d . U . . .
 C30 C 0.3768(3) 0.8122(2) 0.1352(2) 0.0208(6) Uani 1 1 d . U . . .
 H30 H 0.3817 0.8497 0.0849 0.025 Uiso 1 1 calc R . . . .
 C31 C 0.3514(3) 0.7183(3) 0.1545(2) 0.0255(7) Uani 1 1 d . U . . .
 H31 H 0.3402 0.6935 0.1172 0.031 Uiso 1 1 calc R . . . .
 C32 C 0.3426(3) 0.6615(2) 0.2294(2) 0.0261(7) Uani 1 1 d . U . . .
 H32 H 0.3258 0.5986 0.2423 0.031 Uiso 1 1 calc R . . . .
 C33 C 0.3591(3) 0.6989(2) 0.2852(2) 0.0250(7) Uani 1 1 d . U . . .
 H33 H 0.3526 0.6612 0.3355 0.030 Uiso 1 1 calc R . . . .
 C34 C 0.3852(3) 0.7926(2) 0.26550(19) 0.0208(6) Uani 1 1 d . U . . .
 H34 H 0.3964 0.8170 0.3031 0.025 Uiso 1 1 calc R . . . .
 F1 F 0.41920(17) 0.57655(18) 0.51025(13) 0.0320(5) Uani 1 1 d . U . . .
 F2 F 0.2610(2) 0.6122(3) 0.47890(15) 0.0704(11) Uani 1 1 d . U . . .
 F3 F 0.3452(4) 0.7085(2) 0.5108(2) 0.0920(16) Uani 1 1 d . U . . .
 F4 F 0.4601(2) 0.5010(2) 0.78318(16) 0.0427(6) Uani 1 1 d . U . . .
 F5 F 0.3821(2) 0.37169(19) 0.81096(18) 0.0494(7) Uani 1 1 d . U . . .
 F6 F 0.3164(2) 0.4734(3) 0.86579(16) 0.0668(11) Uani 1 1 d . U . . .
 F7 F 0.10663(19) 0.6360(2) 0.94338(16) 0.0414(6) Uani 1 1 d . U . . .
 F8 F -0.0328(2) 0.63312(18) 1.02800(12) 0.0355(5) Uani 1 1 d . U . . .
 F9 F -0.0089(2) 0.75254(16) 0.92901(15) 0.0379(6) Uani 1 1 d . U . . .
 F10 F -0.3975(4) 0.5737(6) 0.9814(5) 0.0498(15) Uani 0.474(9) 1 d D U P A 1
 F11 F -0.4071(4) 0.5274(7) 0.8862(4) 0.0419(17) Uani 0.542(14) 1 d D U P A 1
 F12 F -0.3485(5) 0.4329(4) 0.9838(4) 0.0520(15) Uani 0.447(9) 1 d D U P A 1
 F13 F -0.3704(2) 0.5600(2) 0.59014(16) 0.0455(7) Uani 1 1 d . U . . .
 F14 F -0.3841(3) 0.7019(2) 0.5183(3) 0.0993(18) Uani 1 1 d . U . . .
 F15 F -0.2757(3) 0.6052(3) 0.48218(19) 0.0705(11) Uani 1 1 d . U . . .
 F16 F 0.02307(17) 0.18961(14) 0.92145(12) 0.0260(4) Uani 1 1 d . U . . .
 F17 F -0.14926(19) 0.22082(16) 0.94257(12) 0.0304(5) Uani 1 1 d . U . . .
 F18 F -0.09039(18) 0.10835(13) 0.89634(12) 0.0260(4) Uani 1 1 d . U . . .
 F19 F -0.12738(19) 0.23403(17) 0.60760(13) 0.0294(5) Uani 1 1 d . U . . .
 F20 F 0.0428(2) 0.19804(17) 0.61504(13) 0.0340(5) Uani 1 1 d . U . . .
 F21 F -0.0069(2) 0.33592(15) 0.54736(12) 0.0284(4) Uani 1 1 d . U . . .
 F22 F 0.02728(19) 0.87769(15) 0.50334(13) 0.0314(5) Uani 1 1 d . U . . .
 F23 F -0.1379(2) 0.93562(15) 0.51251(16) 0.0398(6) Uani 1 1 d . U . . .
 F24 F -0.0479(2) 0.90334(14) 0.60581(13) 0.0299(5) Uani 1 1 d . U . . .
 C35 C 0.1087(2) 0.54557(19) 0.70334(15) 0.0112(5) Uani 1 1 d . U . . .
 C36 C 0.1605(2) 0.5812(2) 0.62801(16) 0.0143(5) Uani 1 1 d . U . . .
 H36 H 0.1178 0.6074 0.5899 0.017 Uiso 1 1 calc R . . . .
 C37 C 0.2743(2) 0.5785(2) 0.60897(18) 0.0193(6) Uani 1 1 d . U . . .
 C38 C 0.3417(3) 0.5424(2) 0.66422(19) 0.0211(6) Uani 1 1 d . U . . .
 H38 H 0.4176 0.5425 0.6516 0.025 Uiso 1 1 calc R . . . .
 C39 C 0.2919(2) 0.5063(2) 0.73891(18) 0.0170(5) Uani 1 1 d . U . . .
 C40 C 0.1783(2) 0.5067(2) 0.75755(16) 0.0138(5) Uani 1 1 d . U . . .
 H40 H 0.1476 0.4803 0.8078 0.017 Uiso 1 1 calc R . . . .
 C41 C 0.3256(3) 0.6195(3) 0.5278(2) 0.0355(9) Uani 1 1 d . U . . .
 C42 C 0.3621(3) 0.4639(3) 0.7997(2) 0.0257(7) Uani 1 1 d . U . . .
 C43 C -0.0739(2) 0.56085(18) 0.80553(15) 0.0109(5) Uani 1 1 d . U . . .
 C44 C -0.1830(2) 0.5381(2) 0.83824(16) 0.0128(5) Uani 1 1 d . U . . .
 H44 H -0.2246 0.5123 0.8136 0.015 Uiso 1 1 calc R . . . .
 C45 C -0.2306(2) 0.55265(19) 0.90593(15) 0.0143(5) Uani 1 1 d D U . . .
 C46 C -0.1718(2) 0.5904(2) 0.94522(16) 0.0149(5) Uani 1 1 d . U . . .
 H46 H -0.2031 0.5989 0.9912 0.018 Uiso 1 1 calc R . . . .
 C47 C -0.0650(2) 0.61506(19) 0.91366(16) 0.0131(5) Uani 1 1 d . U . . .
 C48 C -0.0174(2) 0.60168(19) 0.84477(16) 0.0123(5) Uani 1 1 d . U . . .
 H48 H 0.0538 0.6205 0.8245 0.015 Uiso 1 1 calc R . . . .
 C49 C -0.0002(3) 0.6589(2) 0.95321(18) 0.0195(6) Uani 1 1 d . U . . .
 C50 C -0.3468(3) 0.5253(3) 0.93913(19) 0.0219(6) Uani 1 1 d . U . . .
 C51 C -0.0882(2) 0.61264(19) 0.66094(15) 0.0109(5) Uani 1 1 d . U . . .
 C52 C -0.0596(2) 0.70749(19) 0.63479(16) 0.0124(5) Uani 1 1 d . U . . .
 H52 H -0.0052 0.7257 0.6551 0.015 Uiso 1 1 calc R . . . .
 C53 C -0.1098(2) 0.7752(2) 0.57951(16) 0.0133(5) Uani 1 1 d . U . . .
 C54 C -0.1935(2) 0.7515(2) 0.54894(17) 0.0158(5) Uani 1 1 d . U . . .
 H54 H -0.2270 0.7964 0.5118 0.019 Uiso 1 1 calc R . . . .
 C55 C -0.2252(2) 0.6591(2) 0.57553(17) 0.0159(5) Uani 1 1 d . U . . .
 C56 C -0.1733(2) 0.5908(2) 0.62991(16) 0.0137(5) Uani 1 1 d . U . . .
 H56 H -0.1960 0.5292 0.6459 0.016 Uiso 1 1 calc R . . . .
 C57 C -0.3142(3) 0.6317(3) 0.5421(2) 0.0288(7) Uani 1 1 d . U . . .
 C58 C -0.0676(3) 0.8725(2) 0.55028(18) 0.0182(5) Uani 1 1 d . U . . .
 C59 C -0.0443(2) 0.42833(19) 0.73590(16) 0.0112(5) Uani 1 1 d . U . . .
 C60 C -0.0576(2) 0.35938(19) 0.80675(16) 0.0125(5) Uani 1 1 d . U . . .
 H60 H -0.0626 0.3776 0.8499 0.015 Uiso 1 1 calc R . . . .
 C61 C -0.0636(2) 0.2643(2) 0.81487(16) 0.0132(5) Uani 1 1 d . U . . .
 C62 C -0.0581(2) 0.2337(2) 0.75227(17) 0.0149(5) Uani 1 1 d . U . . .
 H62 H -0.0641 0.1705 0.7577 0.018 Uiso 1 1 calc R . . . .
 C63 C -0.0431(2) 0.3010(2) 0.68088(17) 0.0140(5) Uani 1 1 d . U . . .
 C64 C -0.0355(2) 0.3957(2) 0.67266(16) 0.0136(5) Uani 1 1 d . U . . .
 H64 H -0.0243 0.4387 0.6243 0.016 Uiso 1 1 calc R . . . .
 C65 C -0.0715(2) 0.1965(2) 0.89299(18) 0.0168(5) Uani 1 1 d . U . . .
 C66 C -0.0337(3) 0.2682(2) 0.61267(18) 0.0190(6) Uani 1 1 d . U . . .
 B1 B -0.0250(2) 0.5383(2) 0.72613(18) 0.0109(5) Uani 1 1 d . U . . .
 F12A F -0.3569(4) 0.4668(5) 1.0079(3) 0.0520(15) Uani 0.553(9) 1 d D U P A 2
 F10A F -0.4088(3) 0.6047(5) 0.9464(5) 0.0498(15) Uani 0.526(9) 1 d D U P A 2
 F11A F -0.3961(5) 0.4928(7) 0.8971(5) 0.0419(17) Uani 0.458(14) 1 d D U P A 2

loop_
  _atom_site_aniso_label
  _atom_site_aniso_U_11
  _atom_site_aniso_U_22
  _atom_site_aniso_U_33
  _atom_site_aniso_U_23
  _atom_site_aniso_U_13
  _atom_site_aniso_U_12
 Ir1 0.01201(5) 0.01155(5) 0.01268(5) -0.00301(4) -0.00243(3) 0.00138(3)
 P1 0.0101(3) 0.0139(3) 0.0138(3) -0.0036(3) -0.0030(2) 0.0004(2)
 Si1 0.0110(3) 0.0151(3) 0.0155(4) -0.0055(3) -0.0035(3) 0.0004(3)
 O1 0.0121(9) 0.0219(10) 0.0162(10) -0.0096(8) -0.0030(7) 0.0007(7)
 O2 0.0143(9) 0.0148(9) 0.0185(10) -0.0026(8) -0.0043(8) 0.0006(7)
 O3 0.0118(9) 0.0197(10) 0.0191(10) -0.0023(8) -0.0003(8) -0.0008(8)
 N1 0.0121(10) 0.0128(10) 0.0144(11) -0.0031(8) -0.0047(8) -0.0002(8)
 C1 0.0137(12) 0.0161(12) 0.0192(13) -0.0077(10) -0.0020(10) -0.0006(9)
 C2 0.0175(13) 0.0183(14) 0.0312(16) -0.0086(12) 0.0004(12) -0.0026(11)
 C3 0.0258(17) 0.0261(17) 0.053(2) -0.0212(16) 0.0003(16) -0.0077(13)
 C4 0.0264(18) 0.044(2) 0.057(3) -0.0335(19) -0.0062(17) -0.0078(16)
 C5 0.0218(16) 0.050(2) 0.0340(19) -0.0247(17) -0.0086(14) -0.0024(15)
 C6 0.0162(13) 0.0313(16) 0.0203(14) -0.0118(12) -0.0033(11) 0.0006(11)
 C7 0.0265(16) 0.0329(17) 0.0171(14) -0.0052(13) -0.0088(12) 0.0053(13)
 C8 0.0284(17) 0.0164(14) 0.0292(17) 0.0013(12) 0.0007(13) -0.0017(12)
 C9 0.0135(13) 0.0211(14) 0.0280(16) -0.0065(12) -0.0022(11) -0.0026(10)
 C10 0.0254(17) 0.0166(14) 0.044(2) -0.0017(14) -0.0111(15) 0.0021(12)
 C11 0.0116(12) 0.0285(16) 0.0214(15) -0.0049(12) 0.0011(10) -0.0009(11)
 C12 0.0162(14) 0.0268(16) 0.0285(17) -0.0075(13) -0.0037(12) -0.0037(12)
 C13 0.0191(13) 0.0136(12) 0.0141(12) -0.0047(10) 0.0013(10) 0.0028(10)
 C14 0.0201(13) 0.0178(13) 0.0148(12) -0.0055(10) -0.0014(10) 0.0033(10)
 C15 0.0214(14) 0.0171(13) 0.0120(12) -0.0024(10) 0.0011(10) 0.0031(10)
 C16 0.0128(12) 0.0168(13) 0.0238(14) -0.0080(11) 0.0007(10) 0.0021(10)
 C17 0.0162(12) 0.0167(12) 0.0161(13) -0.0059(10) -0.0019(10) 0.0045(10)
 C18 0.0268(16) 0.0229(15) 0.0247(16) -0.0091(12) -0.0123(13) 0.0116(12)
 C19 0.0299(17) 0.0161(13) 0.0232(16) -0.0064(12) 0.0016(13) 0.0000(12)
 C20 0.0306(17) 0.0349(19) 0.0210(15) -0.0137(14) -0.0093(13) 0.0120(14)
 C21 0.042(2) 0.0186(15) 0.0201(15) 0.0007(12) 0.0072(14) 0.0026(14)
 C22 0.0175(14) 0.0287(17) 0.044(2) -0.0199(16) 0.0023(14) -0.0052(12)
 C23 0.0136(12) 0.0208(13) 0.0176(13) -0.0076(11) -0.0039(10) 0.0011(10)
 C24 0.0166(13) 0.0281(16) 0.0184(14) -0.0042(12) -0.0028(11) -0.0032(11)
 C25 0.0260(16) 0.0257(16) 0.0184(14) -0.0006(12) -0.0036(12) -0.0008(12)
 C26 0.0252(15) 0.0287(16) 0.0194(15) -0.0053(12) -0.0069(12) 0.0068(12)
 C27 0.0180(14) 0.0312(16) 0.0228(15) -0.0091(13) -0.0110(12) 0.0026(12)
 C28 0.0154(13) 0.0235(14) 0.0227(15) -0.0075(12) -0.0065(11) 0.0003(11)
 C29 0.0135(12) 0.0166(12) 0.0210(14) -0.0071(11) -0.0007(10) -0.0004(10)
 C30 0.0169(13) 0.0224(14) 0.0261(15) -0.0113(12) -0.0049(11) 0.0012(11)
 C31 0.0187(14) 0.0243(15) 0.0397(19) -0.0176(14) -0.0072(13) 0.0012(12)
 C32 0.0178(14) 0.0193(14) 0.0417(19) -0.0120(13) -0.0007(13) -0.0019(11)
 C33 0.0210(15) 0.0205(15) 0.0291(17) -0.0054(12) 0.0036(12) -0.0016(12)
 C34 0.0193(14) 0.0199(14) 0.0229(15) -0.0080(11) -0.0005(11) 0.0007(11)
 F1 0.0179(9) 0.0461(13) 0.0253(11) -0.0070(10) 0.0058(8) 0.0019(9)
 F2 0.0262(13) 0.141(3) 0.0182(12) 0.0044(15) 0.0011(9) 0.0138(16)
 F3 0.128(3) 0.0257(14) 0.071(2) 0.0123(14) 0.066(2) 0.0032(16)
 F4 0.0244(11) 0.0516(15) 0.0523(16) -0.0074(13) -0.0220(11) -0.0041(10)
 F5 0.0509(16) 0.0314(13) 0.0605(18) 0.0051(12) -0.0364(14) 0.0071(11)
 F6 0.0359(14) 0.140(3) 0.0271(13) -0.0322(17) -0.0174(11) 0.0342(17)
 F7 0.0211(10) 0.0689(18) 0.0534(16) -0.0418(14) -0.0157(10) 0.0031(11)
 F8 0.0497(14) 0.0459(14) 0.0165(10) -0.0124(9) -0.0068(9) -0.0181(11)
 F9 0.0608(16) 0.0189(10) 0.0416(14) -0.0096(9) -0.0247(12) -0.0080(10)
 F10 0.0217(15) 0.061(3) 0.069(4) -0.035(3) 0.017(2) -0.0080(17)
 F11 0.0191(14) 0.078(5) 0.029(2) -0.017(3) 0.0035(11) -0.020(2)
 F12 0.0304(16) 0.068(3) 0.036(2) 0.017(2) 0.0016(18) -0.022(2)
 F13 0.0273(12) 0.0656(18) 0.0448(15) -0.0098(13) -0.0110(11) -0.0246(12)
 F14 0.090(3) 0.0463(18) 0.195(5) -0.037(2) -0.121(3) 0.0174(17)
 F15 0.074(2) 0.111(3) 0.0471(17) -0.0444(19) -0.0021(15) -0.051(2)
 F16 0.0266(10) 0.0215(9) 0.0295(11) 0.0002(8) -0.0183(8) -0.0018(8)
 F17 0.0340(11) 0.0299(11) 0.0162(9) 0.0030(8) 0.0018(8) 0.0077(9)
 F18 0.0351(11) 0.0135(8) 0.0277(10) 0.0015(7) -0.0114(9) -0.0087(8)
 F19 0.0300(11) 0.0366(12) 0.0286(11) -0.0178(9) -0.0040(9) -0.0093(9)
 F20 0.0420(13) 0.0358(12) 0.0326(12) -0.0246(10) -0.0120(10) 0.0206(10)
 F21 0.0416(12) 0.0269(10) 0.0174(9) -0.0105(8) 0.0031(8) -0.0051(9)
 F22 0.0346(12) 0.0234(10) 0.0328(12) -0.0099(9) 0.0128(9) -0.0132(9)
 F23 0.0394(13) 0.0149(9) 0.0579(16) 0.0072(10) -0.0253(12) 0.0008(9)
 F24 0.0489(14) 0.0166(9) 0.0270(11) -0.0099(8) -0.0045(9) -0.0071(9)
 C35 0.0114(11) 0.0096(11) 0.0122(11) -0.0032(9) -0.0013(9) -0.0001(8)
 C36 0.0123(11) 0.0144(12) 0.0131(12) -0.0009(10) -0.0008(9) 0.0012(9)
 C37 0.0139(12) 0.0183(13) 0.0180(13) 0.0015(11) 0.0032(10) 0.0012(10)
 C38 0.0120(12) 0.0221(14) 0.0234(14) -0.0012(12) 0.0003(10) 0.0014(10)
 C39 0.0129(12) 0.0163(13) 0.0209(13) -0.0042(11) -0.0049(10) 0.0026(10)
 C40 0.0125(11) 0.0141(12) 0.0137(12) -0.0033(10) -0.0017(9) 0.0012(9)
 C41 0.0229(16) 0.040(2) 0.0234(16) 0.0094(14) 0.0082(13) 0.0107(14)
 C42 0.0163(14) 0.0338(17) 0.0252(16) -0.0061(13) -0.0072(11) 0.0046(12)
 C43 0.0119(11) 0.0081(10) 0.0119(11) -0.0021(9) -0.0015(9) -0.0003(8)
 C44 0.0119(11) 0.0138(12) 0.0129(12) -0.0045(10) -0.0010(9) -0.0011(9)
 C45 0.0118(11) 0.0165(12) 0.0125(12) -0.0029(10) 0.0010(9) -0.0009(9)
 C46 0.0169(12) 0.0160(12) 0.0112(12) -0.0046(10) -0.0008(9) 0.0007(10)
 C47 0.0160(12) 0.0114(11) 0.0129(12) -0.0043(9) -0.0046(9) 0.0005(9)
 C48 0.0123(11) 0.0109(11) 0.0139(12) -0.0042(9) -0.0017(9) -0.0009(9)
 C49 0.0231(14) 0.0211(14) 0.0176(13) -0.0089(11) -0.0058(11) -0.0025(11)
 C50 0.0149(13) 0.0319(16) 0.0172(13) -0.0065(12) 0.0035(10) -0.0068(11)
 C51 0.0093(10) 0.0120(11) 0.0106(11) -0.0037(9) 0.0012(8) -0.0007(8)
 C52 0.0104(11) 0.0116(11) 0.0150(12) -0.0037(9) -0.0026(9) -0.0002(9)
 C53 0.0128(11) 0.0119(11) 0.0141(12) -0.0037(9) -0.0008(9) 0.0010(9)
 C54 0.0155(12) 0.0179(13) 0.0131(12) -0.0035(10) -0.0039(10) 0.0029(10)
 C55 0.0116(11) 0.0202(13) 0.0177(13) -0.0072(11) -0.0043(10) -0.0003(10)
 C56 0.0120(11) 0.0141(12) 0.0155(12) -0.0054(10) -0.0009(9) -0.0023(9)
 C57 0.0272(16) 0.0289(17) 0.0343(18) -0.0076(14) -0.0175(14) -0.0047(13)
 C58 0.0211(14) 0.0122(12) 0.0199(14) -0.0029(10) -0.0037(11) 0.0001(10)
 C59 0.0095(11) 0.0113(11) 0.0126(11) -0.0039(9) -0.0004(9) -0.0010(8)
 C60 0.0109(11) 0.0131(11) 0.0139(12) -0.0043(9) -0.0026(9) -0.0005(9)
 C61 0.0111(11) 0.0119(11) 0.0159(12) -0.0025(9) -0.0035(9) -0.0001(9)
 C62 0.0134(12) 0.0121(12) 0.0202(13) -0.0069(10) -0.0022(10) -0.0002(9)
 C63 0.0124(12) 0.0147(12) 0.0163(12) -0.0075(10) -0.0010(9) 0.0006(9)
 C64 0.0145(12) 0.0140(12) 0.0123(12) -0.0051(9) -0.0002(9) -0.0006(9)
 C65 0.0166(12) 0.0140(12) 0.0191(13) -0.0019(10) -0.0072(10) -0.0006(10)
 C66 0.0214(14) 0.0186(13) 0.0195(13) -0.0108(11) -0.0013(11) 0.0016(11)
 B1 0.0096(12) 0.0106(12) 0.0130(12) -0.0045(10) -0.0004(9) -0.0020(9)
 F12A 0.0304(16) 0.068(3) 0.036(2) 0.017(2) 0.0016(18) -0.022(2)
 F10A 0.0217(15) 0.061(3) 0.069(4) -0.035(3) 0.017(2) -0.0080(17)
 F11A 0.0191(14) 0.078(5) 0.029(2) -0.017(3) 0.0035(11) -0.020(2)

_geom_special_details
;
 All esds (except the esd in the dihedral angle between two l.s. planes)
 are estimated using the full covariance matrix.  The cell esds are taken
 into account individually in the estimation of esds in distances, angles
 and torsion angles; correlations between esds in cell parameters are only
 used when they are defined by crystal symmetry.  An approximate (isotropic)
 treatment of cell esds is used for estimating esds involving l.s. planes.
;
loop_
  _geom_bond_atom_site_label_1
  _geom_bond_atom_site_label_2
  _geom_bond_distance
  _geom_bond_site_symmetry_2
  _geom_bond_publ_flag
 Ir1 Si1 2.3428(9) . ?
 Ir1 N1 1.992(2) . ?
 Ir1 C13 2.284(3) . ?
 Ir1 C14 2.297(3) . ?
 Ir1 C15 2.164(3) . ?
 Ir1 C16 2.182(3) . ?
 Ir1 C17 2.162(3) . ?
 P1 O1 1.531(2) . ?
 P1 O2 1.564(2) . ?
 P1 O3 1.545(2) . ?
 P1 N1 1.629(3) . ?
 Si1 O1 1.758(2) . ?
 Si1 C23 1.867(3) . ?
 Si1 C29 1.868(3) . ?
 O2 C9 1.459(4) . ?
 O3 C11 1.470(4) . ?
 N1 C1 1.434(4) . ?
 C1 C2 1.424(4) . ?
 C1 C6 1.401(4) . ?
 C2 C3 1.392(5) . ?
 C2 C8 1.504(5) . ?
 C3 H3 0.9300 . ?
 C3 C4 1.384(7) . ?
 C4 H4 0.9300 . ?
 C4 C5 1.384(7) . ?
 C5 H5 0.9300 . ?
 C5 C6 1.408(5) . ?
 C6 C7 1.502(5) . ?
 C7 H7A 0.9600 . ?
 C7 H7B 0.9600 . ?
 C7 H7C 0.9600 . ?
 C8 H8A 0.9600 . ?
 C8 H8B 0.9600 . ?
 C8 H8C 0.9600 . ?
 C9 H9A 0.9700 . ?
 C9 H9B 0.9700 . ?
 C9 C10 1.520(5) . ?
 C10 H10A 0.9600 . ?
 C10 H10B 0.9600 . ?
 C10 H10C 0.9600 . ?
 C11 H11A 0.9700 . ?
 C11 H11B 0.9700 . ?
 C11 C12 1.505(5) . ?
 C12 H12A 0.9600 . ?
 C12 H12B 0.9600 . ?
 C12 H12C 0.9600 . ?
 C13 C14 1.403(4) . ?
 C13 C17 1.468(4) . ?
 C13 C19 1.492(4) . ?
 C14 C15 1.456(5) . ?
 C14 C20 1.493(5) . ?
 C15 C16 1.453(4) . ?
 C15 C21 1.486(4) . ?
 C16 C17 1.424(4) . ?
 C16 C22 1.506(5) . ?
 C17 C18 1.496(4) . ?
 C18 H18A 0.9600 . ?
 C18 H18B 0.9600 . ?
 C18 H18C 0.9600 . ?
 C19 H19A 0.9600 . ?
 C19 H19B 0.9600 . ?
 C19 H19C 0.9600 . ?
 C20 H20A 0.9600 . ?
 C20 H20B 0.9600 . ?
 C20 H20C 0.9600 . ?
 C21 H21A 0.9600 . ?
 C21 H21B 0.9600 . ?
 C21 H21C 0.9600 . ?
 C22 H22A 0.9600 . ?
 C22 H22B 0.9600 . ?
 C22 H22C 0.9600 . ?
 C23 C24 1.395(5) . ?
 C23 C28 1.401(4) . ?
 C24 H24 0.9300 . ?
 C24 C25 1.398(5) . ?
 C25 H25 0.9300 . ?
 C25 C26 1.397(5) . ?
 C26 H26 0.9300 . ?
 C26 C27 1.387(5) . ?
 C27 H27 0.9300 . ?
 C27 C28 1.394(4) . ?
 C28 H28 0.9300 . ?
 C29 C30 1.403(4) . ?
 C29 C34 1.405(5) . ?
 C30 H30 0.9300 . ?
 C30 C31 1.389(5) . ?
 C31 H31 0.9300 . ?
 C31 C32 1.389(6) . ?
 C32 H32 0.9300 . ?
 C32 C33 1.391(5) . ?
 C33 H33 0.9300 . ?
 C33 C34 1.389(5) . ?
 C34 H34 0.9300 . ?
 F1 C41 1.321(4) . ?
 F2 C41 1.355(6) . ?
 F3 C41 1.305(6) . ?
 F4 C42 1.327(4) . ?
 F5 C42 1.339(5) . ?
 F6 C42 1.325(5) . ?
 F7 C49 1.335(4) . ?
 F8 C49 1.337(4) . ?
 F9 C49 1.333(4) . ?
 F10 C50 1.296(6) . ?
 F11 C50 1.336(6) . ?
 F12 C50 1.373(6) . ?
 F13 C57 1.325(5) . ?
 F14 C57 1.316(5) . ?
 F15 C57 1.317(5) . ?
 F16 C65 1.353(3) . ?
 F17 C65 1.337(4) . ?
 F18 C65 1.345(4) . ?
 F19 C66 1.340(4) . ?
 F20 C66 1.349(4) . ?
 F21 C66 1.334(4) . ?
 F22 C58 1.338(4) . ?
 F23 C58 1.342(4) . ?
 F24 C58 1.338(4) . ?
 C35 C36 1.408(4) . ?
 C35 C40 1.401(4) . ?
 C35 B1 1.644(4) . ?
 C36 H36 0.9300 . ?
 C36 C37 1.395(4) . ?
 C37 C38 1.391(5) . ?
 C37 C41 1.504(5) . ?
 C38 H38 0.9300 . ?
 C38 C39 1.391(4) . ?
 C39 C40 1.392(4) . ?
 C39 C42 1.501(4) . ?
 C40 H40 0.9300 . ?
 C43 C44 1.410(4) . ?
 C43 C48 1.399(4) . ?
 C43 B1 1.645(4) . ?
 C44 H44 0.9300 . ?
 C44 C45 1.388(4) . ?
 C45 C46 1.389(4) . ?
 C45 C50 1.506(4) . ?
 C46 H46 0.9300 . ?
 C46 C47 1.386(4) . ?
 C47 C48 1.401(4) . ?
 C47 C49 1.499(4) . ?
 C48 H48 0.9300 . ?
 C50 F12A 1.305(5) . ?
 C50 F10A 1.393(6) . ?
 C50 F11A 1.306(6) . ?
 C51 C52 1.406(4) . ?
 C51 C56 1.400(4) . ?
 C51 B1 1.634(4) . ?
 C52 H52 0.9300 . ?
 C52 C53 1.393(4) . ?
 C53 C54 1.390(4) . ?
 C53 C58 1.495(4) . ?
 C54 H54 0.9300 . ?
 C54 C55 1.384(4) . ?
 C55 C56 1.398(4) . ?
 C55 C57 1.506(4) . ?
 C56 H56 0.9300 . ?
 C59 C60 1.398(4) . ?
 C59 C64 1.413(4) . ?
 C59 B1 1.636(4) . ?
 C60 H60 0.9300 . ?
 C60 C61 1.394(4) . ?
 C61 C62 1.388(4) . ?
 C61 C65 1.492(4) . ?
 C62 H62 0.9300 . ?
 C62 C63 1.395(4) . ?
 C63 C64 1.391(4) . ?
 C63 C66 1.502(4) . ?
 C64 H64 0.9300 . ?

loop_
  _geom_angle_atom_site_label_1
  _geom_angle_atom_site_label_2
  _geom_angle_atom_site_label_3
  _geom_angle
  _geom_angle_site_symmetry_1
  _geom_angle_site_symmetry_3
  _geom_angle_publ_flag
 N1 Ir1 Si1 85.17(7) . . ?
 N1 Ir1 C13 116.03(11) . . ?
 N1 Ir1 C14 112.55(11) . . ?
 N1 Ir1 C15 135.37(11) . . ?
 N1 Ir1 C16 174.39(11) . . ?
 N1 Ir1 C17 144.61(11) . . ?
 C13 Ir1 Si1 143.70(8) . . ?
 C13 Ir1 C14 35.68(10) . . ?
 C14 Ir1 Si1 160.55(9) . . ?
 C15 Ir1 Si1 123.30(9) . . ?
 C15 Ir1 C13 62.63(11) . . ?
 C15 Ir1 C14 37.96(12) . . ?
 C15 Ir1 C16 39.05(12) . . ?
 C16 Ir1 Si1 98.29(9) . . ?
 C16 Ir1 C13 63.37(11) . . ?
 C16 Ir1 C14 63.43(12) . . ?
 C17 Ir1 Si1 107.67(9) . . ?
 C17 Ir1 C13 38.45(11) . . ?
 C17 Ir1 C14 62.76(11) . . ?
 C17 Ir1 C15 64.53(11) . . ?
 C17 Ir1 C16 38.27(11) . . ?
 O1 P1 O2 109.28(12) . . ?
 O1 P1 O3 111.63(13) . . ?
 O1 P1 N1 107.98(12) . . ?
 O2 P1 N1 115.18(13) . . ?
 O3 P1 O2 103.64(12) . . ?
 O3 P1 N1 109.15(13) . . ?
 O1 Si1 Ir1 102.07(8) . . ?
 O1 Si1 C23 103.78(12) . . ?
 O1 Si1 C29 104.33(12) . . ?
 C23 Si1 Ir1 111.56(10) . . ?
 C23 Si1 C29 111.53(14) . . ?
 C29 Si1 Ir1 121.25(11) . . ?
 P1 O1 Si1 119.90(13) . . ?
 C9 O2 P1 120.84(19) . . ?
 C11 O3 P1 126.8(2) . . ?
 P1 N1 Ir1 122.37(14) . . ?
 C1 N1 Ir1 119.25(19) . . ?
 C1 N1 P1 118.4(2) . . ?
 C2 C1 N1 118.0(3) . . ?
 C6 C1 N1 120.9(3) . . ?
 C6 C1 C2 121.1(3) . . ?
 C1 C2 C8 121.8(3) . . ?
 C3 C2 C1 117.9(3) . . ?
 C3 C2 C8 120.3(3) . . ?
 C2 C3 H3 119.2 . . ?
 C4 C3 C2 121.6(4) . . ?
 C4 C3 H3 119.2 . . ?
 C3 C4 H4 119.9 . . ?
 C3 C4 C5 120.1(4) . . ?
 C5 C4 H4 119.9 . . ?
 C4 C5 H5 119.6 . . ?
 C4 C5 C6 120.8(4) . . ?
 C6 C5 H5 119.6 . . ?
 C1 C6 C5 118.5(3) . . ?
 C1 C6 C7 121.5(3) . . ?
 C5 C6 C7 120.0(3) . . ?
 C6 C7 H7A 109.5 . . ?
 C6 C7 H7B 109.5 . . ?
 C6 C7 H7C 109.5 . . ?
 H7A C7 H7B 109.5 . . ?
 H7A C7 H7C 109.5 . . ?
 H7B C7 H7C 109.5 . . ?
 C2 C8 H8A 109.5 . . ?
 C2 C8 H8B 109.5 . . ?
 C2 C8 H8C 109.5 . . ?
 H8A C8 H8B 109.5 . . ?
 H8A C8 H8C 109.5 . . ?
 H8B C8 H8C 109.5 . . ?
 O2 C9 H9A 110.2 . . ?
 O2 C9 H9B 110.2 . . ?
 O2 C9 C10 107.5(3) . . ?
 H9A C9 H9B 108.5 . . ?
 C10 C9 H9A 110.2 . . ?
 C10 C9 H9B 110.2 . . ?
 C9 C10 H10A 109.5 . . ?
 C9 C10 H10B 109.5 . . ?
 C9 C10 H10C 109.5 . . ?
 H10A C10 H10B 109.5 . . ?
 H10A C10 H10C 109.5 . . ?
 H10B C10 H10C 109.5 . . ?
 O3 C11 H11A 109.3 . . ?
 O3 C11 H11B 109.3 . . ?
 O3 C11 C12 111.7(3) . . ?
 H11A C11 H11B 107.9 . . ?
 C12 C11 H11A 109.3 . . ?
 C12 C11 H11B 109.3 . . ?
 C11 C12 H12A 109.5 . . ?
 C11 C12 H12B 109.5 . . ?
 C11 C12 H12C 109.5 . . ?
 H12A C12 H12B 109.5 . . ?
 H12A C12 H12C 109.5 . . ?
 H12B C12 H12C 109.5 . . ?
 C14 C13 Ir1 72.68(17) . . ?
 C14 C13 C17 108.1(3) . . ?
 C14 C13 C19 127.7(3) . . ?
 C17 C13 Ir1 66.30(15) . . ?
 C17 C13 C19 124.2(3) . . ?
 C19 C13 Ir1 127.3(2) . . ?
 C13 C14 Ir1 71.64(17) . . ?
 C13 C14 C15 108.0(3) . . ?
 C13 C14 C20 126.7(3) . . ?
 C15 C14 Ir1 66.06(16) . . ?
 C15 C14 C20 125.3(3) . . ?
 C20 C14 Ir1 126.9(2) . . ?
 C14 C15 Ir1 75.98(18) . . ?
 C14 C15 C21 125.6(3) . . ?
 C16 C15 Ir1 71.14(17) . . ?
 C16 C15 C14 108.2(3) . . ?
 C16 C15 C21 125.7(3) . . ?
 C21 C15 Ir1 124.7(2) . . ?
 C15 C16 Ir1 69.81(17) . . ?
 C15 C16 C22 126.8(3) . . ?
 C17 C16 Ir1 70.12(17) . . ?
 C17 C16 C15 106.8(3) . . ?
 C17 C16 C22 126.4(3) . . ?
 C22 C16 Ir1 126.5(2) . . ?
 C13 C17 Ir1 75.26(16) . . ?
 C13 C17 C18 124.1(3) . . ?
 C16 C17 Ir1 71.61(17) . . ?
 C16 C17 C13 108.5(3) . . ?
 C16 C17 C18 126.8(3) . . ?
 C18 C17 Ir1 126.2(2) . . ?
 C17 C18 H18A 109.5 . . ?
 C17 C18 H18B 109.5 . . ?
 C17 C18 H18C 109.5 . . ?
 H18A C18 H18B 109.5 . . ?
 H18A C18 H18C 109.5 . . ?
 H18B C18 H18C 109.5 . . ?
 C13 C19 H19A 109.5 . . ?
 C13 C19 H19B 109.5 . . ?
 C13 C19 H19C 109.5 . . ?
 H19A C19 H19B 109.5 . . ?
 H19A C19 H19C 109.5 . . ?
 H19B C19 H19C 109.5 . . ?
 C14 C20 H20A 109.5 . . ?
 C14 C20 H20B 109.5 . . ?
 C14 C20 H20C 109.5 . . ?
 H20A C20 H20B 109.5 . . ?
 H20A C20 H20C 109.5 . . ?
 H20B C20 H20C 109.5 . . ?
 C15 C21 H21A 109.5 . . ?
 C15 C21 H21B 109.5 . . ?
 C15 C21 H21C 109.5 . . ?
 H21A C21 H21B 109.5 . . ?
 H21A C21 H21C 109.5 . . ?
 H21B C21 H21C 109.5 . . ?
 C16 C22 H22A 109.5 . . ?
 C16 C22 H22B 109.5 . . ?
 C16 C22 H22C 109.5 . . ?
 H22A C22 H22B 109.5 . . ?
 H22A C22 H22C 109.5 . . ?
 H22B C22 H22C 109.5 . . ?
 C24 C23 Si1 120.6(2) . . ?
 C24 C23 C28 117.9(3) . . ?
 C28 C23 Si1 120.7(2) . . ?
 C23 C24 H24 119.3 . . ?
 C23 C24 C25 121.4(3) . . ?
 C25 C24 H24 119.3 . . ?
 C24 C25 H25 120.1 . . ?
 C26 C25 C24 119.8(3) . . ?
 C26 C25 H25 120.1 . . ?
 C25 C26 H26 120.3 . . ?
 C27 C26 C25 119.4(3) . . ?
 C27 C26 H26 120.3 . . ?
 C26 C27 H27 119.8 . . ?
 C26 C27 C28 120.4(3) . . ?
 C28 C27 H27 119.8 . . ?
 C23 C28 H28 119.5 . . ?
 C27 C28 C23 121.0(3) . . ?
 C27 C28 H28 119.5 . . ?
 C30 C29 Si1 121.5(2) . . ?
 C30 C29 C34 117.5(3) . . ?
 C34 C29 Si1 120.9(2) . . ?
 C29 C30 H30 119.4 . . ?
 C31 C30 C29 121.2(3) . . ?
 C31 C30 H30 119.4 . . ?
 C30 C31 H31 119.9 . . ?
 C30 C31 C32 120.2(3) . . ?
 C32 C31 H31 119.9 . . ?
 C31 C32 H32 120.1 . . ?
 C31 C32 C33 119.8(3) . . ?
 C33 C32 H32 120.1 . . ?
 C32 C33 H33 120.1 . . ?
 C34 C33 C32 119.8(3) . . ?
 C34 C33 H33 120.1 . . ?
 C29 C34 H34 119.2 . . ?
 C33 C34 C29 121.5(3) . . ?
 C33 C34 H34 119.2 . . ?
 C36 C35 B1 122.6(2) . . ?
 C40 C35 C36 115.9(2) . . ?
 C40 C35 B1 121.2(2) . . ?
 C35 C36 H36 119.1 . . ?
 C37 C36 C35 121.8(3) . . ?
 C37 C36 H36 119.1 . . ?
 C36 C37 C41 119.6(3) . . ?
 C38 C37 C36 121.2(3) . . ?
 C38 C37 C41 119.1(3) . . ?
 C37 C38 H38 121.1 . . ?
 C39 C38 C37 117.8(3) . . ?
 C39 C38 H38 121.1 . . ?
 C38 C39 C40 120.9(3) . . ?
 C38 C39 C42 119.2(3) . . ?
 C40 C39 C42 119.8(3) . . ?
 C35 C40 H40 118.8 . . ?
 C39 C40 C35 122.4(3) . . ?
 C39 C40 H40 118.8 . . ?
 F1 C41 F2 104.7(4) . . ?
 F1 C41 C37 113.3(3) . . ?
 F2 C41 C37 112.1(3) . . ?
 F3 C41 F1 107.0(4) . . ?
 F3 C41 F2 107.1(4) . . ?
 F3 C41 C37 112.2(4) . . ?
 F4 C42 F5 105.2(3) . . ?
 F4 C42 C39 113.0(3) . . ?
 F5 C42 C39 112.0(3) . . ?
 F6 C42 F4 106.9(3) . . ?
 F6 C42 F5 106.7(4) . . ?
 F6 C42 C39 112.5(3) . . ?
 C44 C43 B1 118.3(2) . . ?
 C48 C43 C44 115.6(2) . . ?
 C48 C43 B1 126.1(2) . . ?
 C43 C44 H44 118.8 . . ?
 C45 C44 C43 122.4(3) . . ?
 C45 C44 H44 118.8 . . ?
 C44 C45 C46 121.0(3) . . ?
 C44 C45 C50 120.2(3) . . ?
 C46 C45 C50 118.7(3) . . ?
 C45 C46 H46 121.1 . . ?
 C47 C46 C45 117.8(3) . . ?
 C47 C46 H46 121.1 . . ?
 C46 C47 C48 121.2(3) . . ?
 C46 C47 C49 119.3(3) . . ?
 C48 C47 C49 119.5(3) . . ?
 C43 C48 C47 121.9(3) . . ?
 C43 C48 H48 119.0 . . ?
 C47 C48 H48 119.0 . . ?
 F7 C49 F8 106.2(3) . . ?
 F7 C49 C47 112.7(3) . . ?
 F8 C49 C47 112.6(3) . . ?
 F9 C49 F7 106.6(3) . . ?
 F9 C49 F8 106.1(3) . . ?
 F9 C49 C47 112.2(3) . . ?
 F10 C50 F11 109.3(5) . . ?
 F10 C50 F12 106.3(4) . . ?
 F10 C50 C45 114.7(4) . . ?
 F11 C50 F12 103.6(5) . . ?
 F11 C50 C45 112.3(3) . . ?
 F12 C50 C45 110.0(4) . . ?
 F12A C50 C45 113.7(3) . . ?
 F12A C50 F10A 104.1(4) . . ?
 F12A C50 F11A 109.5(5) . . ?
 F10A C50 C45 109.1(3) . . ?
 F11A C50 C45 114.1(4) . . ?
 F11A C50 F10A 105.5(5) . . ?
 C52 C51 B1 118.9(2) . . ?
 C56 C51 C52 115.8(2) . . ?
 C56 C51 B1 125.2(2) . . ?
 C51 C52 H52 118.8 . . ?
 C53 C52 C51 122.4(3) . . ?
 C53 C52 H52 118.8 . . ?
 C52 C53 C58 118.7(3) . . ?
 C54 C53 C52 120.8(3) . . ?
 C54 C53 C58 120.5(3) . . ?
 C53 C54 H54 121.1 . . ?
 C55 C54 C53 117.8(3) . . ?
 C55 C54 H54 121.1 . . ?
 C54 C55 C56 121.4(3) . . ?
 C54 C55 C57 118.7(3) . . ?
 C56 C55 C57 119.9(3) . . ?
 C51 C56 H56 119.1 . . ?
 C55 C56 C51 121.8(3) . . ?
 C55 C56 H56 119.1 . . ?
 F13 C57 C55 112.8(3) . . ?
 F14 C57 F13 108.1(4) . . ?
 F14 C57 F15 104.8(4) . . ?
 F14 C57 C55 112.5(3) . . ?
 F15 C57 F13 105.5(3) . . ?
 F15 C57 C55 112.6(3) . . ?
 F22 C58 F23 107.0(3) . . ?
 F22 C58 F24 105.8(3) . . ?
 F22 C58 C53 112.2(2) . . ?
 F23 C58 C53 112.7(3) . . ?
 F24 C58 F23 106.4(3) . . ?
 F24 C58 C53 112.3(3) . . ?
 C60 C59 C64 115.9(2) . . ?
 C60 C59 B1 122.1(2) . . ?
 C64 C59 B1 121.6(2) . . ?
 C59 C60 H60 118.9 . . ?
 C61 C60 C59 122.3(3) . . ?
 C61 C60 H60 118.9 . . ?
 C60 C61 C65 117.5(3) . . ?
 C62 C61 C60 121.1(3) . . ?
 C62 C61 C65 121.3(3) . . ?
 C61 C62 H62 121.1 . . ?
 C61 C62 C63 117.7(3) . . ?
 C63 C62 H62 121.1 . . ?
 C62 C63 C66 118.1(3) . . ?
 C64 C63 C62 121.2(3) . . ?
 C64 C63 C66 120.6(3) . . ?
 C59 C64 H64 119.1 . . ?
 C63 C64 C59 121.7(3) . . ?
 C63 C64 H64 119.1 . . ?
 F16 C65 C61 111.5(2) . . ?
 F17 C65 F16 105.7(3) . . ?
 F17 C65 F18 107.2(3) . . ?
 F17 C65 C61 113.4(2) . . ?
 F18 C65 F16 105.2(2) . . ?
 F18 C65 C61 113.2(3) . . ?
 F19 C66 F20 106.0(3) . . ?
 F19 C66 C63 112.3(3) . . ?
 F20 C66 C63 111.5(3) . . ?
 F21 C66 F19 106.2(3) . . ?
 F21 C66 F20 106.9(3) . . ?
 F21 C66 C63 113.5(3) . . ?
 C35 B1 C43 113.9(2) . . ?
 C51 B1 C35 111.4(2) . . ?
 C51 B1 C43 106.0(2) . . ?
 C51 B1 C59 113.2(2) . . ?
 C59 B1 C35 102.8(2) . . ?
 C59 B1 C43 109.8(2) . . ?

loop_
  _geom_torsion_atom_site_label_1
  _geom_torsion_atom_site_label_2
  _geom_torsion_atom_site_label_3
  _geom_torsion_atom_site_label_4
  _geom_torsion
  _geom_torsion_site_symmetry_1
  _geom_torsion_site_symmetry_2
  _geom_torsion_site_symmetry_3
  _geom_torsion_site_symmetry_4
  _geom_torsion_publ_flag
 Ir1 Si1 O1 P1 10.46(16) . . . . ?
 Ir1 Si1 C23 C24 62.7(3) . . . . ?
 Ir1 Si1 C23 C28 -107.0(3) . . . . ?
 Ir1 Si1 C29 C30 168.9(2) . . . . ?
 Ir1 Si1 C29 C34 -15.4(3) . . . . ?
 Ir1 N1 C1 C2 -85.5(3) . . . . ?
 Ir1 N1 C1 C6 92.1(3) . . . . ?
 Ir1 C13 C14 C15 -56.1(2) . . . . ?
 Ir1 C13 C14 C20 122.8(3) . . . . ?
 Ir1 C13 C17 C16 64.4(2) . . . . ?
 Ir1 C13 C17 C18 -124.1(3) . . . . ?
 Ir1 C14 C15 C16 -64.3(2) . . . . ?
 Ir1 C14 C15 C21 122.9(3) . . . . ?
 Ir1 C15 C16 C17 -60.7(2) . . . . ?
 Ir1 C15 C16 C22 121.2(3) . . . . ?
 Ir1 C16 C17 C13 -66.8(2) . . . . ?
 Ir1 C16 C17 C18 122.0(3) . . . . ?
 P1 O2 C9 C10 179.8(2) . . . . ?
 P1 O3 C11 C12 -75.0(4) . . . . ?
 P1 N1 C1 C2 92.7(3) . . . . ?
 P1 N1 C1 C6 -89.7(3) . . . . ?
 Si1 C23 C24 C25 -170.1(3) . . . . ?
 Si1 C23 C28 C27 169.3(3) . . . . ?
 Si1 C29 C30 C31 175.1(2) . . . . ?
 Si1 C29 C34 C33 -175.5(3) . . . . ?
 O1 P1 O2 C9 -41.9(3) . . . . ?
 O1 P1 O3 C11 -122.2(3) . . . . ?
 O1 P1 N1 Ir1 16.99(19) . . . . ?
 O1 P1 N1 C1 -161.2(2) . . . . ?
 O1 Si1 C23 C24 -46.4(3) . . . . ?
 O1 Si1 C23 C28 143.8(3) . . . . ?
 O1 Si1 C29 C30 -77.1(3) . . . . ?
 O1 Si1 C29 C34 98.7(3) . . . . ?
 O2 P1 O1 Si1 109.14(16) . . . . ?
 O2 P1 O3 C11 -4.7(3) . . . . ?
 O2 P1 N1 Ir1 -105.44(16) . . . . ?
 O2 P1 N1 C1 76.4(2) . . . . ?
 O3 P1 O1 Si1 -136.81(15) . . . . ?
 O3 P1 O2 C9 -161.0(2) . . . . ?
 O3 P1 N1 Ir1 138.52(15) . . . . ?
 O3 P1 N1 C1 -39.6(2) . . . . ?
 N1 P1 O1 Si1 -16.84(19) . . . . ?
 N1 P1 O2 C9 79.8(3) . . . . ?
 N1 P1 O3 C11 118.5(3) . . . . ?
 N1 C1 C2 C3 176.5(3) . . . . ?
 N1 C1 C2 C8 -3.6(5) . . . . ?
 N1 C1 C6 C5 -177.5(3) . . . . ?
 N1 C1 C6 C7 3.1(5) . . . . ?
 C1 C2 C3 C4 1.0(6) . . . . ?
 C2 C1 C6 C5 0.0(5) . . . . ?
 C2 C1 C6 C7 -179.4(3) . . . . ?
 C2 C3 C4 C5 0.2(6) . . . . ?
 C3 C4 C5 C6 -1.4(6) . . . . ?
 C4 C5 C6 C1 1.3(5) . . . . ?
 C4 C5 C6 C7 -179.3(4) . . . . ?
 C6 C1 C2 C3 -1.1(5) . . . . ?
 C6 C1 C2 C8 178.8(3) . . . . ?
 C8 C2 C3 C4 -178.9(4) . . . . ?
 C13 C14 C15 Ir1 59.6(2) . . . . ?
 C13 C14 C15 C16 -4.8(3) . . . . ?
 C13 C14 C15 C21 -177.5(3) . . . . ?
 C14 C13 C17 Ir1 -61.0(2) . . . . ?
 C14 C13 C17 C16 3.5(3) . . . . ?
 C14 C13 C17 C18 175.0(3) . . . . ?
 C14 C15 C16 Ir1 67.5(2) . . . . ?
 C14 C15 C16 C17 6.8(3) . . . . ?
 C14 C15 C16 C22 -171.3(3) . . . . ?
 C15 C16 C17 Ir1 60.5(2) . . . . ?
 C15 C16 C17 C13 -6.3(3) . . . . ?
 C15 C16 C17 C18 -177.5(3) . . . . ?
 C17 C13 C14 Ir1 57.0(2) . . . . ?
 C17 C13 C14 C15 0.9(3) . . . . ?
 C17 C13 C14 C20 179.8(3) . . . . ?
 C19 C13 C14 Ir1 -124.2(3) . . . . ?
 C19 C13 C14 C15 179.7(3) . . . . ?
 C19 C13 C14 C20 -1.4(5) . . . . ?
 C19 C13 C17 Ir1 120.2(3) . . . . ?
 C19 C13 C17 C16 -175.4(3) . . . . ?
 C19 C13 C17 C18 -3.9(5) . . . . ?
 C20 C14 C15 Ir1 -119.4(3) . . . . ?
 C20 C14 C15 C16 176.3(3) . . . . ?
 C20 C14 C15 C21 3.5(5) . . . . ?
 C21 C15 C16 Ir1 -119.7(3) . . . . ?
 C21 C15 C16 C17 179.6(3) . . . . ?
 C21 C15 C16 C22 1.4(5) . . . . ?
 C22 C16 C17 Ir1 -121.3(3) . . . . ?
 C22 C16 C17 C13 171.9(3) . . . . ?
 C22 C16 C17 C18 0.6(5) . . . . ?
 C23 Si1 O1 P1 126.52(17) . . . . ?
 C23 Si1 C29 C30 34.3(3) . . . . ?
 C23 Si1 C29 C34 -149.9(2) . . . . ?
 C23 C24 C25 C26 1.0(5) . . . . ?
 C24 C23 C28 C27 -0.7(5) . . . . ?
 C24 C25 C26 C27 -1.2(5) . . . . ?
 C25 C26 C27 C28 0.4(5) . . . . ?
 C26 C27 C28 C23 0.5(5) . . . . ?
 C28 C23 C24 C25 -0.1(5) . . . . ?
 C29 Si1 O1 P1 -116.56(17) . . . . ?
 C29 Si1 C23 C24 -158.2(3) . . . . ?
 C29 Si1 C23 C28 32.1(3) . . . . ?
 C29 C30 C31 C32 0.6(5) . . . . ?
 C30 C29 C34 C33 0.4(5) . . . . ?
 C30 C31 C32 C33 0.2(5) . . . . ?
 C31 C32 C33 C34 -0.6(5) . . . . ?
 C32 C33 C34 C29 0.3(5) . . . . ?
 C34 C29 C30 C31 -0.9(5) . . . . ?
 C35 C36 C37 C38 -1.8(5) . . . . ?
 C35 C36 C37 C41 -178.6(3) . . . . ?
 C36 C35 C40 C39 2.3(4) . . . . ?
 C36 C35 B1 C43 -143.2(3) . . . . ?
 C36 C35 B1 C51 -23.3(4) . . . . ?
 C36 C35 B1 C59 98.2(3) . . . . ?
 C36 C37 C38 C39 2.1(5) . . . . ?
 C36 C37 C41 F1 -149.3(4) . . . . ?
 C36 C37 C41 F2 -31.1(5) . . . . ?
 C36 C37 C41 F3 89.4(5) . . . . ?
 C37 C38 C39 C40 -0.3(5) . . . . ?
 C37 C38 C39 C42 177.9(3) . . . . ?
 C38 C37 C41 F1 33.8(6) . . . . ?
 C38 C37 C41 F2 152.0(4) . . . . ?
 C38 C37 C41 F3 -87.5(5) . . . . ?
 C38 C39 C40 C35 -2.0(5) . . . . ?
 C38 C39 C42 F4 28.7(5) . . . . ?
 C38 C39 C42 F5 -89.9(4) . . . . ?
 C38 C39 C42 F6 149.9(4) . . . . ?
 C40 C35 C36 C37 -0.4(4) . . . . ?
 C40 C35 B1 C43 44.0(3) . . . . ?
 C40 C35 B1 C51 163.8(2) . . . . ?
 C40 C35 B1 C59 -74.7(3) . . . . ?
 C40 C39 C42 F4 -153.1(3) . . . . ?
 C40 C39 C42 F5 88.4(4) . . . . ?
 C40 C39 C42 F6 -31.9(5) . . . . ?
 C41 C37 C38 C39 179.0(3) . . . . ?
 C42 C39 C40 C35 179.8(3) . . . . ?
 C43 C44 C45 C46 -0.4(4) . . . . ?
 C43 C44 C45 C50 -178.8(3) . . . . ?
 C44 C43 C48 C47 2.7(4) . . . . ?
 C44 C43 B1 C35 -167.2(2) . . . . ?
 C44 C43 B1 C51 70.0(3) . . . . ?
 C44 C43 B1 C59 -52.6(3) . . . . ?
 C44 C45 C46 C47 1.5(4) . . . . ?
 C44 C45 C50 F10 -152.9(5) . . . . ?
 C44 C45 C50 F11 -27.3(6) . . . . ?
 C44 C45 C50 F12 87.4(5) . . . . ?
 C44 C45 C50 F12A 123.4(5) . . . . ?
 C44 C45 C50 F10A -120.9(5) . . . . ?
 C44 C45 C50 F11A -3.2(7) . . . . ?
 C45 C46 C47 C48 -0.5(4) . . . . ?
 C45 C46 C47 C49 178.0(3) . . . . ?
 C46 C45 C50 F10 28.6(6) . . . . ?
 C46 C45 C50 F11 154.2(5) . . . . ?
 C46 C45 C50 F12 -91.1(5) . . . . ?
 C46 C45 C50 F12A -55.1(6) . . . . ?
 C46 C45 C50 F10A 60.6(5) . . . . ?
 C46 C45 C50 F11A 178.3(6) . . . . ?
 C46 C47 C48 C43 -1.6(4) . . . . ?
 C46 C47 C49 F7 147.6(3) . . . . ?
 C46 C47 C49 F8 27.5(4) . . . . ?
 C46 C47 C49 F9 -92.1(3) . . . . ?
 C48 C43 C44 C45 -1.7(4) . . . . ?
 C48 C43 B1 C35 13.1(4) . . . . ?
 C48 C43 B1 C51 -109.7(3) . . . . ?
 C48 C43 B1 C59 127.7(3) . . . . ?
 C48 C47 C49 F7 -33.8(4) . . . . ?
 C48 C47 C49 F8 -153.9(3) . . . . ?
 C48 C47 C49 F9 86.5(4) . . . . ?
 C49 C47 C48 C43 179.8(3) . . . . ?
 C50 C45 C46 C47 180.0(3) . . . . ?
 C51 C52 C53 C54 1.6(4) . . . . ?
 C51 C52 C53 C58 -174.7(3) . . . . ?
 C52 C51 C56 C55 0.9(4) . . . . ?
 C52 C51 B1 C35 -50.6(3) . . . . ?
 C52 C51 B1 C43 73.7(3) . . . . ?
 C52 C51 B1 C59 -165.9(2) . . . . ?
 C52 C53 C54 C55 0.4(4) . . . . ?
 C52 C53 C58 F22 74.8(4) . . . . ?
 C52 C53 C58 F23 -164.3(3) . . . . ?
 C52 C53 C58 F24 -44.1(4) . . . . ?
 C53 C54 C55 C56 -1.7(4) . . . . ?
 C53 C54 C55 C57 -178.9(3) . . . . ?
 C54 C53 C58 F22 -101.5(3) . . . . ?
 C54 C53 C58 F23 19.3(4) . . . . ?
 C54 C53 C58 F24 139.5(3) . . . . ?
 C54 C55 C56 C51 1.0(4) . . . . ?
 C54 C55 C57 F13 -151.8(3) . . . . ?
 C54 C55 C57 F14 -29.3(5) . . . . ?
 C54 C55 C57 F15 88.9(4) . . . . ?
 C56 C51 C52 C53 -2.2(4) . . . . ?
 C56 C51 B1 C35 132.0(3) . . . . ?
 C56 C51 B1 C43 -103.6(3) . . . . ?
 C56 C51 B1 C59 16.8(4) . . . . ?
 C56 C55 C57 F13 30.9(5) . . . . ?
 C56 C55 C57 F14 153.4(4) . . . . ?
 C56 C55 C57 F15 -88.4(4) . . . . ?
 C57 C55 C56 C51 178.2(3) . . . . ?
 C58 C53 C54 C55 176.7(3) . . . . ?
 C59 C60 C61 C62 -0.9(4) . . . . ?
 C59 C60 C61 C65 176.6(3) . . . . ?
 C60 C59 C64 C63 1.9(4) . . . . ?
 C60 C59 B1 C35 98.0(3) . . . . ?
 C60 C59 B1 C43 -23.5(3) . . . . ?
 C60 C59 B1 C51 -141.8(3) . . . . ?
 C60 C61 C62 C63 1.8(4) . . . . ?
 C60 C61 C65 F16 -69.3(3) . . . . ?
 C60 C61 C65 F17 49.9(4) . . . . ?
 C60 C61 C65 F18 172.3(3) . . . . ?
 C61 C62 C63 C64 -0.8(4) . . . . ?
 C61 C62 C63 C66 178.2(3) . . . . ?
 C62 C61 C65 F16 108.2(3) . . . . ?
 C62 C61 C65 F17 -132.6(3) . . . . ?
 C62 C61 C65 F18 -10.2(4) . . . . ?
 C62 C63 C64 C59 -1.1(4) . . . . ?
 C62 C63 C66 F19 67.0(4) . . . . ?
 C62 C63 C66 F20 -51.8(4) . . . . ?
 C62 C63 C66 F21 -172.6(3) . . . . ?
 C64 C59 C60 C61 -1.0(4) . . . . ?
 C64 C59 B1 C35 -74.4(3) . . . . ?
 C64 C59 B1 C43 164.1(2) . . . . ?
 C64 C59 B1 C51 45.9(3) . . . . ?
 C64 C63 C66 F19 -114.0(3) . . . . ?
 C64 C63 C66 F20 127.3(3) . . . . ?
 C64 C63 C66 F21 6.4(4) . . . . ?
 C65 C61 C62 C63 -175.6(3) . . . . ?
 C66 C63 C64 C59 179.9(3) . . . . ?
 B1 C35 C36 C37 -173.6(3) . . . . ?
 B1 C35 C40 C39 175.6(3) . . . . ?
 B1 C43 C44 C45 178.6(2) . . . . ?
 B1 C43 C48 C47 -177.6(3) . . . . ?
 B1 C51 C52 C53 -179.8(2) . . . . ?
 B1 C51 C56 C55 178.4(3) . . . . ?
 B1 C59 C60 C61 -173.8(2) . . . . ?
 B1 C59 C64 C63 174.8(3) . . . . ?

_shelx_SHELXL_version_number      '2014/7'
_iucr_refine_instructions_details
;

    mo_jl142_0m_a.res created by SHELXL-2014/7

TITL mo_jl142_0m_a.res in P-1
REM Old TITL mo_jl142_0m in P1
REM SHELXT solution in P-1
REM R1 0.086, Rweak 0.011, Alpha 0.047, Orientation as input
REM Formula found by SHELXT: C62 B2 N4 O4 F23 P2 Ir
CELL 0.71073 12.3952 15.0207 18.8687 71.324 80.182 84.966
ZERR 2 0.0019 0.0022 0.0028 0.003 0.003 0.003
LATT 1
SFAC C H B F Ir N O P Si
UNIT 132 112 2 48 2 2 6 2 2
SADI 0.01 F10 F11 F11 F12 F12 F10 F10A F11A F11A F12A F12A F10A
SADI 0.005 C45 F10 C45 F11 C45 F12 C45 F10A C45 F11A C45 F12A
RIGU
EADP F10 F10A
EADP F11 F11A
EADP F12 F12A
 
L.S. 10
PLAN  20
TEMP 23
BOND $H
LIST 4
MORE -1
CONF
fmap 2
acta 52
REM <olex2.extras>
REM <HklSrc "%.\\mo_jl142_0m_a.hkl">
REM </olex2.extras>
 
WGHT    0.037700   12.025500
FVAR       0.25863   0.44668   0.47431   0.54189
IR1   5    0.440080    1.048978    0.255659    11.00000    0.01201    0.01155 =
         0.01268   -0.00301   -0.00243    0.00138
P1    8    0.665296    0.991781    0.169566    11.00000    0.01006    0.01394 =
         0.01376   -0.00363   -0.00300    0.00045
SI1   9    0.440098    0.974845    0.163687    11.00000    0.01098    0.01510 =
         0.01548   -0.00549   -0.00346    0.00043
O1    7    0.580387    0.968454    0.128598    11.00000    0.01206    0.02190 =
         0.01617   -0.00961   -0.00297    0.00072
O2    7    0.728657    0.899359    0.209128    11.00000    0.01430    0.01476 =
         0.01849   -0.00259   -0.00432    0.00059
O3    7    0.755968    1.053163    0.113326    11.00000    0.01180    0.01972 =
         0.01907   -0.00228   -0.00027   -0.00079
N1    6    0.602151    1.048916    0.225732    11.00000    0.01205    0.01284 =
         0.01441   -0.00309   -0.00472   -0.00024
C1    1    0.665963    1.103113    0.252517    11.00000    0.01369    0.01611 =
         0.01921   -0.00767   -0.00203   -0.00057
C2    1    0.679083    1.199930    0.210510    11.00000    0.01747    0.01827 =
         0.03120   -0.00864    0.00045   -0.00258
C3    1    0.735802    1.253658    0.238895    11.00000    0.02576    0.02612 =
         0.05301   -0.02122    0.00027   -0.00770
AFIX  43
H3    2    0.744174    1.317248    0.212709    11.00000   -1.20000
AFIX   0
C4    1    0.780042    1.214698    0.305168    11.00000    0.02636    0.04413 =
         0.05697   -0.03352   -0.00621   -0.00778
AFIX  43
H4    2    0.817408    1.252120    0.323055    11.00000   -1.20000
AFIX   0
C5    1    0.768768    1.120139    0.344866    11.00000    0.02178    0.04962 =
         0.03398   -0.02473   -0.00855   -0.00237
AFIX  43
H5    2    0.800107    1.094191    0.388751    11.00000   -1.20000
AFIX   0
C6    1    0.710452    1.062770    0.319632    11.00000    0.01616    0.03129 =
         0.02028   -0.01176   -0.00325    0.00064
C7    1    0.698045    0.960584    0.363996    11.00000    0.02653    0.03289 =
         0.01713   -0.00525   -0.00880    0.00529
AFIX 137
H7A   2    0.624812    0.943004    0.365677    11.00000   -1.50000
H7B   2    0.712125    0.950121    0.414566    11.00000   -1.50000
H7C   2    0.749266    0.923301    0.340105    11.00000   -1.50000
AFIX   0
C8    1    0.633697    1.243972    0.137631    11.00000    0.02842    0.01638 =
         0.02922    0.00133    0.00069   -0.00166
AFIX 137
H8A   2    0.679653    1.226004    0.097711    11.00000   -1.50000
H8B   2    0.631508    1.311178    0.125525    11.00000   -1.50000
H8C   2    0.560955    1.222852    0.143129    11.00000   -1.50000
AFIX   0
C9    1    0.670912    0.812548    0.248942    11.00000    0.01349    0.02113 =
         0.02795   -0.00649   -0.00223   -0.00257
AFIX  23
H9A   2    0.634200    0.794376    0.214476    11.00000   -1.20000
H9B   2    0.616358    0.821338    0.289805    11.00000   -1.20000
AFIX   0
C10   1    0.755555    0.737031    0.280254    11.00000    0.02542    0.01663 =
         0.04379   -0.00172   -0.01113    0.00215
AFIX 137
H10A  2    0.807004    0.726770    0.239187    11.00000   -1.50000
H10B  2    0.719548    0.679615    0.308864    11.00000   -1.50000
H10C  2    0.793579    0.757006    0.312491    11.00000   -1.50000
AFIX   0
C11   1    0.874410    1.030775    0.105323    11.00000    0.01163    0.02854 =
         0.02136   -0.00490    0.00112   -0.00089
AFIX  23
H11A  2    0.909809    1.071591    0.057484    11.00000   -1.20000
H11B  2    0.887145    0.966368    0.104694    11.00000   -1.20000
AFIX   0
C12   1    0.924428    1.042766    0.168853    11.00000    0.01618    0.02681 =
         0.02847   -0.00746   -0.00369   -0.00371
AFIX 137
H12A  2    1.002744    1.036293    0.158197    11.00000   -1.50000
H12B  2    0.898093    0.995623    0.215299    11.00000   -1.50000
H12C  2    0.904352    1.104030    0.173586    11.00000   -1.50000
AFIX   0
C13   1    0.363607    1.170911    0.296887    11.00000    0.01906    0.01361 =
         0.01410   -0.00470    0.00133    0.00281
C14   1    0.384873    1.096461    0.360869    11.00000    0.02007    0.01784 =
         0.01479   -0.00550   -0.00141    0.00334
C15   1    0.329358    1.014522    0.361738    11.00000    0.02138    0.01706 =
         0.01196   -0.00240    0.00113    0.00309
C16   1    0.265450    1.042747    0.299858    11.00000    0.01283    0.01677 =
         0.02384   -0.00796    0.00066    0.00205
C17   1    0.292511    1.136974    0.256953    11.00000    0.01616    0.01675 =
         0.01614   -0.00588   -0.00191    0.00449
C18   1    0.244557    1.197910    0.189232    11.00000    0.02679    0.02293 =
         0.02467   -0.00910   -0.01228    0.01163
AFIX 137
H18A  2    0.301013    1.234426    0.153025    11.00000   -1.50000
H18B  2    0.188501    1.239268    0.204449    11.00000   -1.50000
H18C  2    0.213388    1.159135    0.166767    11.00000   -1.50000
AFIX   0
C19   1    0.402482    1.268906    0.272268    11.00000    0.02989    0.01607 =
         0.02321   -0.00638    0.00159    0.00004
AFIX 137
H19A  2    0.467012    1.269672    0.293858    11.00000   -1.50000
H19B  2    0.346140    1.308914    0.289028    11.00000   -1.50000
H19C  2    0.419314    1.291204    0.218071    11.00000   -1.50000
AFIX   0
C20   1    0.453719    1.098892    0.417829    11.00000    0.03062    0.03495 =
         0.02103   -0.01374   -0.00925    0.01202
AFIX 137
H20A  2    0.491329    1.039081    0.435130    11.00000   -1.50000
H20B  2    0.407806    1.112072    0.459955    11.00000   -1.50000
H20C  2    0.506300    1.147086    0.395037    11.00000   -1.50000
AFIX   0
C21   1    0.327006    0.921572    0.421444    11.00000    0.04190    0.01864 =
         0.02009    0.00067    0.00715    0.00264
AFIX 137
H21A  2    0.296468    0.876510    0.404804    11.00000   -1.50000
H21B  2    0.282812    0.926864    0.467027    11.00000   -1.50000
H21C  2    0.400217    0.901290    0.431076    11.00000   -1.50000
AFIX   0
C22   1    0.183488    0.984994    0.285123    11.00000    0.01754    0.02870 =
         0.04432   -0.01989    0.00234   -0.00519
AFIX 137
H22A  2    0.173975    1.008671    0.232829    11.00000   -1.50000
H22B  2    0.114613    0.988878    0.316376    11.00000   -1.50000
H22C  2    0.209623    0.920614    0.296770    11.00000   -1.50000
AFIX   0
C23   1    0.379270    1.053451    0.080559    11.00000    0.01356    0.02079 =
         0.01760   -0.00763   -0.00389    0.00106
C24   1    0.428139    1.137464    0.036043    11.00000    0.01657    0.02812 =
         0.01838   -0.00415   -0.00280   -0.00324
AFIX  43
H24   2    0.497161    1.149527    0.043168    11.00000   -1.20000
AFIX   0
C25   1    0.375518    1.203874   -0.019039    11.00000    0.02601    0.02569 =
         0.01840   -0.00055   -0.00356   -0.00082
AFIX  43
H25   2    0.409938    1.259006   -0.048714    11.00000   -1.20000
AFIX   0
C26   1    0.271099    1.187189   -0.029380    11.00000    0.02522    0.02867 =
         0.01944   -0.00529   -0.00693    0.00683
AFIX  43
H26   2    0.235021    1.231578   -0.065268    11.00000   -1.20000
AFIX   0
C27   1    0.221678    1.103874    0.014321    11.00000    0.01805    0.03116 =
         0.02280   -0.00914   -0.01100    0.00264
AFIX  43
H27   2    0.152355    1.092232    0.007428    11.00000   -1.20000
AFIX   0
C28   1    0.275197    1.037457    0.068510    11.00000    0.01536    0.02350 =
         0.02267   -0.00751   -0.00650    0.00032
AFIX  43
H28   2    0.241301    0.981664    0.097110    11.00000   -1.20000
AFIX   0
C29   1    0.395035    0.851463    0.190107    11.00000    0.01350    0.01656 =
         0.02097   -0.00709   -0.00071   -0.00036
C30   1    0.376766    0.812192    0.135155    11.00000    0.01686    0.02237 =
         0.02607   -0.01128   -0.00493    0.00116
AFIX  43
H30   2    0.381750    0.849686    0.084878    11.00000   -1.20000
AFIX   0
C31   1    0.351377    0.718343    0.154516    11.00000    0.01870    0.02426 =
         0.03974   -0.01758   -0.00718    0.00116
AFIX  43
H31   2    0.340194    0.693471    0.117215    11.00000   -1.20000
AFIX   0
C32   1    0.342634    0.661507    0.229418    11.00000    0.01780    0.01931 =
         0.04171   -0.01203   -0.00068   -0.00189
AFIX  43
H32   2    0.325827    0.598629    0.242252    11.00000   -1.20000
AFIX   0
C33   1    0.359081    0.698863    0.285194    11.00000    0.02100    0.02048 =
         0.02914   -0.00536    0.00358   -0.00165
AFIX  43
H33   2    0.352628    0.661209    0.335479    11.00000   -1.20000
AFIX   0
C34   1    0.385171    0.792596    0.265504    11.00000    0.01932    0.01995 =
         0.02286   -0.00804   -0.00053    0.00075
AFIX  43
H34   2    0.396374    0.816968    0.303086    11.00000   -1.20000
AFIX   0
 
F1    4    0.419203    0.576549    0.510254    11.00000    0.01791    0.04606 =
         0.02530   -0.00701    0.00576    0.00185
F2    4    0.261003    0.612241    0.478904    11.00000    0.02621    0.14087 =
         0.01821    0.00444    0.00108    0.01377
F3    4    0.345243    0.708477    0.510759    11.00000    0.12845    0.02574 =
         0.07097    0.01226    0.06634    0.00322
F4    4    0.460108    0.500986    0.783179    11.00000    0.02440    0.05155 =
         0.05226   -0.00743   -0.02200   -0.00409
F5    4    0.382108    0.371694    0.810965    11.00000    0.05091    0.03143 =
         0.06051    0.00508   -0.03638    0.00713
F6    4    0.316419    0.473351    0.865788    11.00000    0.03590    0.13966 =
         0.02707   -0.03223   -0.01743    0.03416
F7    4    0.106629    0.636035    0.943376    11.00000    0.02114    0.06889 =
         0.05336   -0.04180   -0.01567    0.00310
F8    4   -0.032826    0.633117    1.027998    11.00000    0.04969    0.04594 =
         0.01652   -0.01240   -0.00678   -0.01811
F9    4   -0.008945    0.752544    0.929013    11.00000    0.06080    0.01890 =
         0.04159   -0.00959   -0.02471   -0.00803
PART 1
F10   4   -0.397483    0.573656    0.981442    31.00000    0.02174    0.06117 =
         0.06926   -0.03451    0.01712   -0.00795
F11   4   -0.407065    0.527421    0.886221    41.00000    0.01911    0.07826 =
         0.02922   -0.01702    0.00350   -0.01979
F12   4   -0.348474    0.432908    0.983778    21.00000    0.03035    0.06767 =
         0.03559    0.01705    0.00159   -0.02226
PART 0
F13   4   -0.370400    0.560016    0.590145    11.00000    0.02733    0.06555 =
         0.04476   -0.00982   -0.01096   -0.02465
F14   4   -0.384089    0.701875    0.518303    11.00000    0.08989    0.04631 =
         0.19451   -0.03724   -0.12092    0.01738
F15   4   -0.275729    0.605210    0.482176    11.00000    0.07351    0.11142 =
         0.04709   -0.04442   -0.00208   -0.05073
F16   4    0.023073    0.189609    0.921449    11.00000    0.02656    0.02149 =
         0.02949    0.00016   -0.01830   -0.00178
F17   4   -0.149263    0.220821    0.942570    11.00000    0.03404    0.02994 =
         0.01621    0.00295    0.00183    0.00774
F18   4   -0.090385    0.108354    0.896344    11.00000    0.03509    0.01349 =
         0.02773    0.00147   -0.01142   -0.00870
F19   4   -0.127378    0.234034    0.607596    11.00000    0.03002    0.03663 =
         0.02861   -0.01779   -0.00402   -0.00933
F20   4    0.042759    0.198044    0.615039    11.00000    0.04202    0.03579 =
         0.03259   -0.02461   -0.01200    0.02064
F21   4   -0.006893    0.335919    0.547359    11.00000    0.04157    0.02686 =
         0.01744   -0.01053    0.00306   -0.00512
F22   4    0.027276    0.877685    0.503343    11.00000    0.03459    0.02338 =
         0.03279   -0.00992    0.01281   -0.01319
F23   4   -0.137879    0.935621    0.512513    11.00000    0.03945    0.01486 =
         0.05792    0.00721   -0.02527    0.00076
F24   4   -0.047891    0.903341    0.605810    11.00000    0.04886    0.01660 =
         0.02702   -0.00986   -0.00450   -0.00706
C35   1    0.108703    0.545575    0.703341    11.00000    0.01138    0.00963 =
         0.01216   -0.00319   -0.00129   -0.00010
C36   1    0.160527    0.581234    0.628012    11.00000    0.01231    0.01441 =
         0.01312   -0.00092   -0.00085    0.00117
AFIX  43
H36   2    0.117759    0.607354    0.589901    11.00000   -1.20000
AFIX   0
C37   1    0.274307    0.578462    0.608967    11.00000    0.01394    0.01833 =
         0.01802    0.00151    0.00315    0.00115
C38   1    0.341696    0.542437    0.664223    11.00000    0.01200    0.02210 =
         0.02342   -0.00125    0.00031    0.00139
AFIX  43
H38   2    0.417577    0.542492    0.651633    11.00000   -1.20000
AFIX   0
C39   1    0.291918    0.506330    0.738914    11.00000    0.01289    0.01631 =
         0.02092   -0.00422   -0.00492    0.00264
C40   1    0.178345    0.506744    0.757553    11.00000    0.01249    0.01409 =
         0.01375   -0.00335   -0.00174    0.00124
AFIX  43
H40   2    0.147563    0.480284    0.807820    11.00000   -1.20000
AFIX   0
C41   1    0.325611    0.619514    0.527784    11.00000    0.02293    0.03978 =
         0.02343    0.00943    0.00817    0.01074
C42   1    0.362093    0.463886    0.799672    11.00000    0.01625    0.03381 =
         0.02519   -0.00613   -0.00724    0.00460
C43   1   -0.073892    0.560853    0.805528    11.00000    0.01186    0.00811 =
         0.01188   -0.00210   -0.00150   -0.00033
C44   1   -0.183008    0.538056    0.838239    11.00000    0.01188    0.01379 =
         0.01289   -0.00454   -0.00103   -0.00114
AFIX  43
H44   2   -0.224615    0.512301    0.813555    11.00000   -1.20000
AFIX   0
C45   1   -0.230591    0.552649    0.905929    11.00000    0.01185    0.01649 =
         0.01246   -0.00288    0.00096   -0.00093
C46   1   -0.171802    0.590398    0.945215    11.00000    0.01694    0.01602 =
         0.01116   -0.00461   -0.00079    0.00067
AFIX  43
H46   2   -0.203055    0.598852    0.991154    11.00000   -1.20000
AFIX   0
C47   1   -0.064955    0.615059    0.913658    11.00000    0.01604    0.01138 =
         0.01292   -0.00427   -0.00462    0.00053
C48   1   -0.017385    0.601676    0.844767    11.00000    0.01233    0.01093 =
         0.01391   -0.00425   -0.00169   -0.00088
AFIX  43
H48   2    0.053846    0.620480    0.824522    11.00000   -1.20000
AFIX   0
C49   1   -0.000177    0.658913    0.953213    11.00000    0.02309    0.02114 =
         0.01760   -0.00886   -0.00581   -0.00247
C50   1   -0.346784    0.525290    0.939126    11.00000    0.01489    0.03189 =
         0.01717   -0.00655    0.00354   -0.00677
C51   1   -0.088153    0.612643    0.660944    11.00000    0.00925    0.01198 =
         0.01063   -0.00370    0.00120   -0.00067
C52   1   -0.059572    0.707488    0.634794    11.00000    0.01042    0.01159 =
         0.01501   -0.00370   -0.00256   -0.00022
AFIX  43
H52   2   -0.005159    0.725701    0.655133    11.00000   -1.20000
AFIX   0
C53   1   -0.109844    0.775154    0.579510    11.00000    0.01284    0.01190 =
         0.01408   -0.00367   -0.00081    0.00101
C54   1   -0.193485    0.751539    0.548935    11.00000    0.01547    0.01790 =
         0.01311   -0.00345   -0.00391    0.00292
AFIX  43
H54   2   -0.227019    0.796377    0.511819    11.00000   -1.20000
AFIX   0
C55   1   -0.225217    0.659137    0.575533    11.00000    0.01162    0.02018 =
         0.01769   -0.00721   -0.00426   -0.00025
C56   1   -0.173326    0.590838    0.629910    11.00000    0.01196    0.01410 =
         0.01551   -0.00540   -0.00095   -0.00225
AFIX  43
H56   2   -0.196021    0.529212    0.645907    11.00000   -1.20000
AFIX   0
C57   1   -0.314213    0.631681    0.542115    11.00000    0.02725    0.02886 =
         0.03425   -0.00758   -0.01748   -0.00467
C58   1   -0.067610    0.872465    0.550282    11.00000    0.02107    0.01216 =
         0.01991   -0.00285   -0.00367    0.00013
C59   1   -0.044266    0.428334    0.735903    11.00000    0.00955    0.01127 =
         0.01256   -0.00390   -0.00039   -0.00097
C60   1   -0.057565    0.359379    0.806749    11.00000    0.01094    0.01305 =
         0.01388   -0.00430   -0.00257   -0.00050
AFIX  43
H60   2   -0.062571    0.377570    0.849936    11.00000   -1.20000
AFIX   0
C61   1   -0.063580    0.264302    0.814870    11.00000    0.01107    0.01186 =
         0.01592   -0.00249   -0.00345   -0.00014
C62   1   -0.058065    0.233697    0.752270    11.00000    0.01339    0.01210 =
         0.02022   -0.00685   -0.00217   -0.00016
AFIX  43
H62   2   -0.064106    0.170491    0.757714    11.00000   -1.20000
AFIX   0
C63   1   -0.043147    0.301019    0.680885    11.00000    0.01242    0.01470 =
         0.01630   -0.00753   -0.00105    0.00064
C64   1   -0.035502    0.395738    0.672660    11.00000    0.01447    0.01399 =
         0.01230   -0.00510   -0.00017   -0.00063
AFIX  43
H64   2   -0.024329    0.438736    0.624269    11.00000   -1.20000
AFIX   0
C65   1   -0.071467    0.196516    0.892994    11.00000    0.01656    0.01396 =
         0.01912   -0.00186   -0.00717   -0.00057
C66   1   -0.033664    0.268241    0.612675    11.00000    0.02137    0.01856 =
         0.01948   -0.01076   -0.00128    0.00161
B1    3   -0.024976    0.538274    0.726132    11.00000    0.00956    0.01058 =
         0.01301   -0.00454   -0.00036   -0.00203
PART 2
F12A  4   -0.356869    0.466823    1.007867   -21.00000    0.03035    0.06767 =
         0.03559    0.01705    0.00159   -0.02226
F10A  4   -0.408832    0.604692    0.946355   -31.00000    0.02174    0.06117 =
         0.06926   -0.03451    0.01712   -0.00795
F11A  4   -0.396096    0.492776    0.897097   -41.00000    0.01911    0.07826 =
         0.02922   -0.01702    0.00350   -0.01979
HKLF 4
 
REM  mo_jl142_0m_a.res in P-1
REM R1 =  0.0380 for   18372 Fo > 4sig(Fo)  and  0.0438 for all   20042 data
REM    904 parameters refined using    927 restraints
 
END  
     
WGHT      0.0377     12.0255 

REM Highest difference peak  4.001,  deepest hole -1.340,  1-sigma level  0.142
Q1    1   0.4056  1.0228  0.2947  11.00000  0.05    4.00
Q2    1   0.3958  1.0162  0.2645  11.00000  0.05    2.11
Q3    1   0.4842  1.0572  0.2111  11.00000  0.05    2.10
Q4    1   0.2652  0.6717  0.4894  11.00000  0.05    1.67
Q5    1   0.4304  0.9106  0.3004  11.00000  0.05    1.67
Q6    1  -0.3782  0.5242  1.0083  11.00000  0.05    1.66
Q7    1   0.4518  1.1844  0.2055  11.00000  0.05    1.60
Q8    1  -0.3768  0.4466  0.9280  11.00000  0.05    1.48
Q9    1  -0.4188  0.5928  0.9132  11.00000  0.05    1.40
Q10   1   0.4938  1.0910  0.1604  11.00000  0.05    1.28
Q11   1   0.3187  1.0265  0.3220  11.00000  0.05    1.27
Q12   1   0.4026  1.0036  0.3476  11.00000  0.05    1.27
Q13   1   0.4007  1.0915  0.2625  11.00000  0.05    1.23
Q14   1   0.4726  1.1029  0.1661  11.00000  0.05    1.21
Q15   1   0.4931  1.0740  0.2555  11.00000  0.05    1.18
Q16   1  -0.4040  0.6045  0.9677  11.00000  0.05    1.17
Q17   1   0.6773  1.0695  0.0701  11.00000  0.05    1.15
Q18   1   0.6171  1.0908  0.2470  11.00000  0.05    1.05
Q19   1   0.2150  1.1058  0.3410  11.00000  0.05    1.05
Q20   1   0.4185  0.7859  0.3397  11.00000  0.05    1.02

REM The information below was added by Olex2.
REM
REM R1 = 0.0380 for 18372 Fo > 4sig(Fo) and 0.0438 for all 75509 data
REM n/a parameters refined using n/a restraints
REM Highest difference peak 4.00, deepest hole -1.34
REM Mean Shift 0, Max Shift -0.006.

REM +++ Tabular Listing of Refinement Information +++
REM R1_all = 0.0438
REM R1_gt = 0.0380
REM wR_ref = 0.0966
REM GOOF = 1.103
REM Shift_max = -0.006
REM Shift_mean = 0
REM Reflections_all = 75509
REM Reflections_gt = 18372
REM Parameters = n/a
REM Hole = -1.34
REM Peak = 4.00
REM Flack = n/a

;
_olex2_submission_special_instructions 'No special instructions were received'
loop_
  _refln_index_h
  _refln_index_k
  _refln_index_l
  _refln_F_squared_meas
  _refln_F_squared_sigma
 1 0 0 868.81 19
 1 0 0 860.11 19.1
 -2 0 0 495.85 11
 -2 0 0 489.35 11.2
 2 0 0 475.05 11.1
 -3 0 0 5429.66 118.89
 -3 0 0 5496.35 118.89
 3 0 0 5310.27 119.49
 -4 0 0 497.25 12.2
 -4 0 0 514.75 11.8
 4 0 0 509.35 12.1
 -5 0 0 886.91 20.8
 -5 0 0 879.31 20.4
 5 0 0 910.21 20.7
 -6 0 0 722.13 17.3
 -6 0 0 724.53 16.8
 6 0 0 710.83 17.2
 -7 0 0 463.45 11.6
 -7 0 0 473.85 12.3
 7 0 0 466.55 12.1
 -8 0 0 613.84 15.1
 -8 0 0 605.94 15.8
 8 0 0 635.64 15.7
 -9 0 0 422.16 12
 -9 0 0 403.86 11.1
 9 0 0 439.76 11.9
 -10 0 0 750.02 18.5
 -10 0 0 760.82 19.5
 10 0 0 753.62 19.3
 10 0 0 747.83 19.3
 -11 0 0 89.19 5.5
 -11 0 0 108.99 6.8
 11 0 0 90.99 6.5
 11 0 0 111.39 6.7
 -12 0 0 1.4 3.3
 -12 0 0 0.7 2.8
 12 0 0 -0.7 3.2
 12 0 0 -1.2 3.2
 -13 0 0 57.59 6
 -13 0 0 55.69 7.6
 13 0 0 62.49 7.6
 -14 0 0 22.6 4
 -14 0 0 31.3 4.9
 14 0 0 22.8 4.7
 -15 0 0 86.49 7.5
 -15 0 0 88.89 9.4
 15 0 0 89.99 9.3
 -16 0 0 181.28 11.4
 -16 0 0 160.78 9.4
 16 0 0 180.68 11.7
 -17 0 0 135.99 9.5
 -17 0 0 139.39 12
 17 0 0 142.69 12
 17 -1 0 266.07 14.1
 -17 1 0 263.57 11.7
 -17 1 0 274.27 14.2
 16 -1 0 262.87 13.3
 -16 1 0 260.47 13.3
 -16 1 0 259.87 11
 15 -1 0 102.19 9.7
 -15 1 0 95.49 9.8
 -15 1 0 86.49 7.7
 14 -1 0 264.67 11.7
 -14 1 0 263.97 10.1
 -14 1 0 262.97 11.9
 13 -1 0 44.5 7.2
 13 -1 0 37.4 6.9
 -13 1 0 40.9 5.9
 -13 1 0 41.5 7.6
 12 -1 0 7.3 3.5
 12 -1 0 10.2 3.6
 -12 1 0 9.2 3.1
 -12 1 0 10.8 3.6
 11 -1 0 42.6 5.8
 11 -1 0 35.3 5.7
 -11 1 0 38.7 4.8
 -11 1 0 41.4 5.9
 10 -1 0 346.97 10.6
 -10 1 0 345.97 10.9
 -10 1 0 323.47 9.7
 9 -1 0 625.14 15.9
 -9 1 0 585.94 15.1
 -9 1 0 598.04 16
 8 -1 0 471.95 12.7
 -8 1 0 478.35 12.2
 -8 1 0 490.15 13
 7 -1 0 1090.69 25.8
 -7 1 0 1096.49 26
 -7 1 0 1114.19 25.3
 6 -1 0 920.21 22
 -6 1 0 927.51 22.1
 -6 1 0 965.6 21.6
 5 -1 0 481.85 11.9
 5 -1 0 481.35 13
 -5 1 0 487.65 11.6
 -5 1 0 489.15 12.1
 4 -1 0 314.87 7.7
 4 -1 0 284.87 7.7
 -4 1 0 305.77 7.9
 -4 1 0 311.47 7.5
 3 -1 0 695.53 15.8
 3 -1 0 697.13 15.9
 -3 1 0 689.63 15.7
 -3 1 0 684.53 16
 2 -1 0 20.7 1.4
 2 -1 0 22.5 1.3
 -2 1 0 22.7 1.3
 -2 1 0 20.5 1.5
 1 -1 0 1865.11 43.5
 1 -1 0 1927.41 43.7
 1 -1 0 2028 43.5
 -1 1 0 1981.6 43.6
 -1 1 0 1996.1 43.4
 -1 1 0 2018.2 43.5
 -1 1 0 2017.3 43.6
 -1 1 0 1991.6 43.4
 0 -1 0 1017 26.3
 0 1 0 1266.27 26.3
 0 1 0 1226.28 26.2
 0 1 0 1287.47 26.4
 0 1 0 1132.79 26.3
 -1 -1 0 2635.14 68.09
 -1 -1 0 3035.5 68.49
 1 1 0 3268.97 67.89
 1 1 0 3261.47 67.99
 1 1 0 3207.08 67.79
 -2 -1 0 1059.29 23.4
 -2 -1 0 1054.69 23.6
 2 1 0 1060.89 23.5
 -3 -1 0 634.34 14.5
 -3 -1 0 631.04 14.2
 3 1 0 625.74 14.5
 -4 -1 0 981.2 22.6
 -4 -1 0 990.4 22.2
 4 1 0 991.5 22.5
 -5 -1 0 719.63 16.7
 -5 -1 0 703.13 16.3
 5 1 0 697.73 16.6
 -6 -1 0 864.51 19.6
 -6 -1 0 846.82 20.1
 6 1 0 838.52 20
 -7 -1 0 703.33 17.3
 -7 -1 0 721.33 16.8
 7 1 0 704.43 17.3
 -8 -1 0 1036.1 24.8
 -8 -1 0 1052.69 24
 8 1 0 1045.8 24.7
 8 1 0 1008.2 24.6
 -9 -1 0 1180.28 28.2
 -9 -1 0 1184.88 27.3
 9 1 0 1174.48 28
 9 1 0 1164.48 28
 -10 -1 0 449.36 12.7
 -10 -1 0 429.16 11.6
 10 1 0 434.16 12.6
 10 1 0 437.76 12.6
 -11 -1 0 47.7 5.9
 -11 -1 0 45.5 4.5
 11 1 0 40.4 5.5
 11 1 0 53.69 5.7
 -12 -1 0 78.79 5.6
 -12 -1 0 88.59 7.2
 12 1 0 85.39 6.9
 -13 -1 0 1 3.8
 -13 -1 0 -4.2 3
 13 1 0 -5.1 3.6
 -14 -1 0 6 3.6
 -14 -1 0 8.4 4.4
 14 1 0 6.2 4.2
 -15 -1 0 27.8 5.3
 -15 -1 0 30.2 4.4
 15 1 0 23.2 5.1
 -16 -1 0 212.28 10
 -16 -1 0 212.68 12.2
 16 1 0 210.08 12.2
 -17 -1 0 413.56 16.6
 -17 -1 0 399.06 14.2
 17 1 0 415.36 16.5
 17 -2 0 152.68 12.3
 -17 2 0 162.18 12.6
 -17 2 0 166.78 10.1
 16 -2 0 43.8 6.3
 -16 2 0 64.69 8.1
 -16 2 0 61.49 10.4
 15 -2 0 197.08 11.3
 -15 2 0 191.38 9.5
 -15 2 0 196.38 11.4
 14 -2 0 34.8 6.7
 14 -2 0 50.19 8.2
 -14 2 0 30.7 5.1
 -14 2 0 35.4 4.5
 13 -2 0 383.36 13.3
 13 -2 0 350.16 12.6
 13 -2 0 401.86 13.5
 -13 2 0 389.86 12.1
 -13 2 0 388.36 13.6
 12 -2 0 424.86 13.7
 12 -2 0 427.46 13.8
 -12 2 0 429.96 12.5
 -12 2 0 433.46 13.9
 11 -2 0 -2 3
 11 -2 0 1.3 3
 -11 2 0 4.4 3.2
 -11 2 0 -1.9 2.6
 10 -2 0 23.6 3.4
 -10 2 0 23.9 3.4
 -10 2 0 21.7 2.9
 9 -2 0 883.21 21.6
 -9 2 0 866.71 21.8
 -9 2 0 855.31 20.8
 8 -2 0 1055.29 24.9
 -8 2 0 1033 25.1
 -8 2 0 1032.8 24.3
 7 -2 0 1761.22 39.1
 7 -2 0 1693.33 39.2
 -7 2 0 1689.33 38.8
 -7 2 0 1707.53 39.4
 6 -2 0 1756.22 38.9
 6 -2 0 1704.03 39.1
 -6 2 0 1692.63 38.7
 -6 2 0 1734.33 39.3
 5 -2 0 473.55 11.6
 5 -2 0 474.25 11.8
 -5 2 0 476.05 11.9
 -5 2 0 480.35 11.5
 4 -2 0 237.98 6.5
 4 -2 0 239.38 6.3
 4 -2 0 243.18 6.4
 -4 2 0 239.78 6.6
 -4 2 0 242.48 6.2
 3 -2 0 63.89 2.6
 3 -2 0 61.49 2.6
 3 -2 0 64.89 2.4
 -3 2 0 60.19 2.8
 -3 2 0 64.99 2.5
 -3 2 0 65.19 2.4
 2 -2 0 333.27 8.2
 2 -2 0 341.67 8.2
 2 -2 0 340.07 8.1
 -2 2 0 348.57 8.3
 -2 2 0 332.47 8.2
 -2 2 0 343.67 8.1
 -2 2 0 334.97 8.1
 1 -2 0 3358.56 74.19
 1 -2 0 3421.66 74.19
 1 -2 0 3393.06 73.89
 1 -2 0 3376.66 73.99
 1 -2 0 3328.17 73.99
 1 -2 0 3360.86 74.29
 1 -2 0 3290.87 74.39
 -1 2 0 3267.57 74.29
 -1 2 0 3351.76 73.89
 -1 2 0 3471.25 73.99
 -1 2 0 3392.96 74.19
 0 -2 0 3307.67 72.89
 0 -2 0 3201.78 72.79
 0 -2 0 3291.77 72.69
 0 -2 0 3336.17 72.99
 0 -2 0 3270.27 72.39
 0 -2 0 3366.06 72.69
 0 2 0 3356.76 72.69
 0 2 0 3175.38 72.49
 0 2 0 3362.06 72.89
 -1 -2 0 5647.93 125.19
 -1 -2 0 5518.85 126.19
 -1 -2 0 6000.7 125.39
 -1 -2 0 5796.32 126.39
 1 2 0 5588.74 125.19
 1 2 0 5498.55 124.99
 1 2 0 5777.92 125.29
 -2 -2 0 480.95 10.8
 -2 -2 0 471.85 10.9
 -2 -2 0 477.75 11.2
 -2 -2 0 472.35 11.1
 2 2 0 481.55 10.9
 -3 -2 0 1489.05 33.2
 -3 -2 0 1522.05 33.4
 3 2 0 1507.15 33.4
 3 2 0 1469.35 33.4
 -4 -2 0 8.8 1.1
 -4 -2 0 10.7 1.9
 4 2 0 8 1.2
 4 2 0 7 1.2
 -5 -2 0 506.85 11.9
 -5 -2 0 508.25 12.3
 5 2 0 491.65 12.2
 5 2 0 511.85 12.2
 -6 -2 0 31.6 2.3
 -6 -2 0 35.7 2.9
 6 2 0 32.3 2.9
 6 2 0 27.5 2.9
 -7 -2 0 304.77 8
 -7 -2 0 309.67 8.6
 7 2 0 299.17 8.6
 7 2 0 305.27 8.5
 -8 -2 0 1197.38 27
 -8 -2 0 1189.98 27.7
 8 2 0 1153.18 27.6
 8 2 0 1159.48 27.6
 -9 -2 0 349.77 10.3
 -9 -2 0 355.66 9.4
 9 2 0 341.07 10.1
 9 2 0 340.47 10.2
 -10 -2 0 572.14 14.6
 -10 -2 0 584.84 15.6
 10 2 0 569.04 15.4
 10 2 0 585.24 15.4
 -11 -2 0 596.64 15.4
 -11 -2 0 617.34 16.6
 11 2 0 595.34 16.5
 -12 -2 0 215.28 7.8
 -12 -2 0 214.18 9.3
 12 2 0 215.08 9.2
 -13 -2 0 55.09 5.6
 -13 -2 0 64.59 7.3
 13 2 0 59.19 7.2
 -14 -2 0 21.3 3.9
 -14 -2 0 24.6 4.7
 14 2 0 18.6 4.5
 -15 -2 0 25.1 5.1
 -15 -2 0 20.9 4.2
 15 2 0 24.4 5.1
 -16 -2 0 51.39 9.6
 -16 -2 0 68.29 7.7
 16 2 0 58.69 9.8
 -17 -2 0 54.29 8.4
 -17 -2 0 81.49 12.3
 17 2 0 78.39 10.9
 17 -3 0 20.6 6.1
 -17 3 0 22.7 5.4
 -17 3 0 16.2 6.1
 16 -3 0 185.88 12
 -16 3 0 198.18 12.4
 -16 3 0 188.68 10.2
 15 -3 0 63.79 9.1
 -15 3 0 51.79 7.6
 -15 3 0 62.09 9.8
 14 -3 0 341.27 13.1
 14 -3 0 349.07 15
 14 -3 0 364.76 13.4
 -14 3 0 360.46 13.8
 -14 3 0 326.27 11.9
 13 -3 0 598.84 17.6
 13 -3 0 593.34 17.5
 13 -3 0 568.04 16.8
 -13 3 0 599.94 17.9
 -13 3 0 578.14 16.3
 12 -3 0 181.38 9.1
 12 -3 0 197.28 9.3
 12 -3 0 177.98 8.3
 -12 3 0 199.28 9.6
 -12 3 0 177.18 8
 11 -3 0 45.6 6.3
 11 -3 0 66.99 5.5
 -11 3 0 52.39 6.5
 -11 3 0 50.59 5.2
 10 -3 0 119.59 6
 10 -3 0 116.39 6.6
 -10 3 0 110.69 5.6
 -10 3 0 112.99 6.9
 9 -3 0 365.66 10.8
 9 -3 0 350.76 10.5
 -9 3 0 357.66 10.1
 -9 3 0 357.16 11
 8 -3 0 205.98 6.7
 8 -3 0 205.28 6.9
 8 -3 0 204.68 7.3
 -8 3 0 209.38 6.7
 -8 3 0 213.78 7.6
 7 -3 0 1027.7 24.2
 7 -3 0 1024.6 24
 7 -3 0 1024.7 24.3
 -7 3 0 1025.2 24.5
 -7 3 0 1018.1 23.8
 6 -3 0 654.33 16.2
 6 -3 0 661.73 16.1
 6 -3 0 681.83 15.9
 -6 3 0 647.84 15.8
 -6 3 0 668.03 16.4
 5 -3 0 333.87 8.5
 5 -3 0 327.97 8.7
 5 -3 0 333.57 8.8
 -5 3 0 335.87 9
 -5 3 0 330.37 8.5
 4 -3 0 505.15 12.4
 4 -3 0 504.55 12.4
 4 -3 0 526.45 12.3
 -4 3 0 516.05 12.2
 -4 3 0 513.55 12.6
 -4 3 0 531.05 12.4
 3 -3 0 1090.59 25.1
 3 -3 0 1127.39 25
 3 -3 0 1092.09 25.1
 -3 3 0 1085.49 24.9
 -3 3 0 1148.69 25
 -3 3 0 1110.89 25.2
 -3 3 0 1112.49 25.3
 2 -3 0 20.8 1.6
 2 -3 0 17.8 1.8
 2 -3 0 21.4 1.8
 2 -3 0 20.4 1.8
 2 -3 0 22.1 1.9
 -2 3 0 21.3 1.7
 -2 3 0 21.6 1.9
 -2 3 0 19.1 1.9
 1 -3 0 193.38 4.8
 1 -3 0 185.98 5.1
 1 -3 0 190.88 5.2
 1 -3 0 197.08 4.7
 1 -3 0 201.48 5
 1 -3 0 193.88 5.2
 -1 3 0 191.08 4.9
 -1 3 0 193.58 5
 0 -3 0 583.34 12.9
 0 -3 0 552.84 13.1
 0 -3 0 573.94 12.9
 0 -3 0 569.54 12.9
 0 -3 0 543.35 13.1
 0 -3 0 566.84 12.7
 0 3 0 574.64 12.8
 0 3 0 586.84 12.9
 0 3 0 558.44 12.8
 -1 -3 0 1994.8 43.3
 -1 -3 0 1996.7 43.1
 -1 -3 0 1905.21 43.4
 -1 -3 0 2029.5 43.3
 -1 -3 0 1941.51 43.4
 1 3 0 1856.41 43.2
 1 3 0 1977.2 43.1
 -2 -3 0 1803.02 40.5
 -2 -3 0 1856.81 40.5
 -2 -3 0 1814.32 40.9
 -2 -3 0 1816.92 40.8
 -2 -3 0 1871.71 40.7
 2 3 0 1811.72 40.5
 2 3 0 1872.91 40.6
 -3 -3 0 1048.3 24.2
 -3 -3 0 1075.99 24.3
 -3 -3 0 1082.19 23.9
 -3 -3 0 1064.79 23.8
 3 3 0 1048.1 23.9
 -4 -3 0 775.62 17.5
 -4 -3 0 779.92 18.2
 -4 -3 0 772.82 17.8
 4 3 0 767.12 17.8
 -5 -3 0 162.08 4.9
 -5 -3 0 163.68 4.5
 5 3 0 153.28 4.9
 -6 -3 0 2.2 1.5
 -6 -3 0 3 1.2
 6 3 0 1.9 1.5
 6 3 0 2.2 1.5
 -7 -3 0 73.89 3.3
 -7 -3 0 72.29 4
 7 3 0 64.39 3.9
 7 3 0 68.49 4
 -8 -3 0 466.35 11.4
 -8 -3 0 453.85 12.1
 8 3 0 445.86 12.1
 -9 -3 0 485.95 12.4
 -9 -3 0 498.45 13.3
 9 3 0 486.25 13.2
 -10 -3 0 213.98 8
 -10 -3 0 211.28 6.9
 10 3 0 207.28 7.9
 -11 -3 0 329.67 10.6
 -11 -3 0 316.97 9.5
 11 3 0 316.67 10.7
 -12 -3 0 35.5 4.8
 -12 -3 0 39.4 6.3
 12 3 0 29 4
 -13 -3 0 159.98 7.1
 -13 -3 0 156.28 8.8
 13 3 0 148.39 8.7
 -14 -3 0 31.6 4.8
 -14 -3 0 40.1 6
 14 3 0 30.6 4.9
 -15 -3 0 -6.4 4.4
 -15 -3 0 3.5 3.8
 15 3 0 -6.5 4.4
 -16 -3 0 14.9 6
 -16 -3 0 19.9 4.4
 16 3 0 18.5 5.5
 -17 -3 0 135.49 9.2
 -17 -3 0 136.19 11.7
 17 3 0 146.69 11.8
 17 -4 0 13.5 6
 16 -4 0 149.09 11.4
 -16 4 0 159.88 12.2
 -16 4 0 147.19 9.7
 15 -4 0 72.79 9.7
 -15 4 0 76.89 7.9
 -15 4 0 65.99 10
 14 -4 0 105.29 9.3
 14 -4 0 106.29 9
 -14 4 0 120.79 7.9
 -14 4 0 104.19 9.5
 13 -4 0 531.75 16.7
 13 -4 0 559.74 16.9
 13 -4 0 509.45 15.8
 -13 4 0 549.45 15.5
 -13 4 0 552.44 17.1
 12 -4 0 83.99 7.5
 12 -4 0 68.89 7.4
 12 -4 0 77.79 6.3
 -12 4 0 91.79 6.4
 -12 4 0 77.79 7.7
 11 -4 0 109.29 7.3
 11 -4 0 122.69 6.5
 -11 4 0 117.89 6.3
 -11 4 0 108.99 7.6
 10 -4 0 2.9 2.8
 10 -4 0 2.2 2.4
 -10 4 0 5.5 3
 -10 4 0 3.8 2.6
 9 -4 0 46.7 4.9
 9 -4 0 45.5 4.3
 -9 4 0 43 5.2
 -9 4 0 37.8 4.3
 8 -4 0 56.99 4.7
 8 -4 0 55.99 3.8
 8 -4 0 55.59 4.1
 -8 4 0 53.59 4.1
 -8 4 0 52.09 4.8
 7 -4 0 155.38 5.6
 7 -4 0 152.08 5.9
 7 -4 0 157.68 5.4
 -7 4 0 148.59 5.4
 -7 4 0 147.99 6.1
 6 -4 0 593.94 14.7
 6 -4 0 609.84 14.9
 6 -4 0 604.74 14.6
 -6 4 0 594.44 15.1
 -6 4 0 583.74 14.5
 5 -4 0 847.82 20
 5 -4 0 833.62 20
 5 -4 0 856.31 19.8
 -5 4 0 850.41 20.2
 -5 4 0 837.72 19.8
 -5 4 0 874.21 19.9
 4 -4 0 3101.29 68.19
 4 -4 0 3087.89 68.49
 4 -4 0 3003.1 68.29
 -4 4 0 3088.09 68.49
 -4 4 0 3149.28 68.29
 -4 4 0 3044.7 68.19
 3 -4 0 317.47 8.2
 3 -4 0 317.57 7.8
 3 -4 0 310.07 8
 -3 4 0 316.47 7.9
 -3 4 0 326.27 8.3
 -3 4 0 318.17 8.1
 2 -4 0 740.33 16.9
 2 -4 0 714.63 16.8
 2 -4 0 736.03 16.6
 2 -4 0 682.13 16.6
 2 -4 0 718.83 16.1
 2 -4 0 716.53 16.5
 -2 4 0 733.83 16.7
 -2 4 0 714.23 16.4
 -2 4 0 712.83 16.5
 1 -4 0 767.12 17.9
 1 -4 0 749.73 17.7
 1 -4 0 773.42 17.4
 1 -4 0 764.22 17.8
 1 -4 0 778.82 17.5
 1 -4 0 768.22 17.3
 -1 4 0 759.82 17.4
 -1 4 0 789.42 17.5
 0 -4 0 590.94 14.3
 0 -4 0 622.64 14.1
 0 -4 0 616.64 13.8
 0 -4 0 619.84 14.1
 0 -4 0 611.54 14
 0 -4 0 590.34 14.3
 0 4 0 628.44 13.9
 0 4 0 635.94 14
 0 4 0 602.74 13.8
 -1 -4 0 1444.56 32.5
 -1 -4 0 1455.35 32.2
 -1 -4 0 1472.55 32.5
 -1 -4 0 1405.66 32.7
 -1 -4 0 1434.56 32.7
 1 4 0 1498.15 32.5
 1 4 0 1475.75 32.4
 1 4 0 1473.85 32.3
 -2 -4 0 289.57 7.3
 -2 -4 0 276.77 6.8
 -2 -4 0 269.77 7.1
 -2 -4 0 278.57 7
 2 4 0 281.57 6.7
 2 4 0 274.37 6.7
 -3 -4 0 1818.12 40.3
 -3 -4 0 1810.92 40
 -3 -4 0 1779.42 39.9
 -3 -4 0 1798.02 40.4
 -3 -4 0 1804.12 40.5
 3 4 0 1783.82 40
 -4 -4 0 544.05 13.1
 -4 -4 0 544.25 12.8
 -4 -4 0 537.05 12.6
 -4 -4 0 539.25 13.3
 4 4 0 553.64 12.8
 -5 -4 0 303.27 7.8
 -5 -4 0 291.87 7.4
 -5 -4 0 298.47 8.4
 5 4 0 298.77 7.8
 -6 -4 0 1198.48 27.3
 -6 -4 0 1226.38 28.3
 -6 -4 0 1218.38 27.7
 6 4 0 1182.68 27.7
 -7 -4 0 -2.1 1.4
 -7 -4 0 -0.5 1.6
 7 4 0 0.2 1.7
 -8 -4 0 158.48 5.2
 -8 -4 0 164.18 6
 8 4 0 155.48 6
 -9 -4 0 465.25 12.5
 -9 -4 0 465.35 11.6
 9 4 0 431.66 12.4
 -10 -4 0 535.65 14.4
 -10 -4 0 527.85 13.4
 10 4 0 515.45 14.4
 -11 -4 0 362.56 10.5
 -11 -4 0 373.26 11.6
 11 4 0 373.86 11.6
 -12 -4 0 134.09 7.7
 -12 -4 0 130.49 6.3
 12 4 0 142.19 7.9
 -13 -4 0 173.28 7.4
 -13 -4 0 177.68 9.1
 13 4 0 171.88 9.1
 -14 -4 0 40.3 5.9
 -14 -4 0 22.6 4.6
 14 4 0 26.6 4.9
 -15 -4 0 43.8 6.6
 -15 -4 0 52.99 9.1
 -15 -4 0 35.7 6.2
 15 4 0 40.5 5.7
 -16 -4 0 6.3 5.6
 -16 -4 0 5.6 4
 16 4 0 8.6 5.2
 -17 -4 0 2 4.4
 -17 -4 0 -6 6
 17 4 0 5.9 5.7
 16 -5 0 45.9 6.6
 -16 5 0 57.49 10.9
 -16 5 0 48.2 5.9
 15 -5 0 57.19 9.4
 -15 5 0 69.19 10.2
 -15 5 0 72.69 8.1
 14 -5 0 85.29 8.7
 14 -5 0 83.99 9
 -14 5 0 69.89 9.4
 -14 5 0 74.59 7.6
 13 -5 0 153.08 9.5
 13 -5 0 154.08 9.2
 13 -5 0 167.48 9.7
 -13 5 0 168.88 9.9
 -13 5 0 157.68 8.1
 12 -5 0 523.65 15.8
 12 -5 0 508.45 15
 12 -5 0 526.55 15.8
 -12 5 0 523.75 14.8
 -12 5 0 510.95 16.1
 11 -5 0 200.78 8
 11 -5 0 176.28 8.8
 -11 5 0 192.48 7.7
 -11 5 0 189.78 9.3
 10 -5 0 70.19 6.2
 10 -5 0 74.99 5.3
 -10 5 0 77.59 6.5
 -10 5 0 73.39 5.2
 9 -5 0 29.4 4.8
 9 -5 0 26.6 4.1
 -9 5 0 24 2.9
 -9 5 0 29.2 5.1
 8 -5 0 55.09 4.2
 8 -5 0 57.39 4.7
 8 -5 0 53.69 3.8
 -8 5 0 51.49 5
 -8 5 0 50.39 4.2
 7 -5 0 323.07 9.3
 7 -5 0 324.27 8.8
 7 -5 0 312.77 9
 -7 5 0 300.27 9.5
 -7 5 0 307.27 8.8
 6 -5 0 337.77 8.9
 6 -5 0 330.87 9.2
 6 -5 0 322.57 9.1
 -6 5 0 320.77 9.5
 -6 5 0 323.47 8.9
 -6 5 0 350.96 9.1
 5 -5 0 465.45 12
 5 -5 0 471.45 11.7
 5 -5 0 463.95 12
 -5 5 0 461.55 12.2
 -5 5 0 510.65 12.6
 -5 5 0 481.95 11.8
 4 -5 0 1349.27 31.5
 4 -5 0 1391.16 31.8
 4 -5 0 1389.36 31.4
 -4 5 0 1409.86 31.5
 -4 5 0 1409.66 32
 -4 5 0 1388.66 31.8
 3 -5 0 497.15 12
 3 -5 0 518.75 12.6
 3 -5 0 506.35 11.7
 3 -5 0 539.35 13.2
 3 -5 0 494.25 12.4
 3 -5 0 515.35 12.8
 3 -5 0 500.45 12.3
 -3 5 0 501.55 12.1
 -3 5 0 522.55 12.6
 -3 5 0 512.15 12.4
 2 -5 0 596.84 14
 2 -5 0 586.64 14.3
 2 -5 0 598.94 14.4
 2 -5 0 590.44 13.6
 2 -5 0 598.04 13.9
 2 -5 0 581.34 14.2
 -2 5 0 604.44 14.1
 -2 5 0 592.74 14
 -2 5 0 604.74 13.8
 1 -5 0 415.76 9.6
 1 -5 0 404.26 10.3
 1 -5 0 393.16 10.1
 1 -5 0 406.46 9.8
 1 -5 0 421.76 9.9
 1 -5 0 401.56 10.3
 1 -5 0 404.96 9.6
 -1 5 0 404.46 9.7
 -1 5 0 417.86 9.8
 0 -5 0 393.16 9.4
 0 -5 0 384.16 9.5
 0 -5 0 401.76 9.1
 0 -5 0 374.16 9.8
 0 -5 0 402.16 9.5
 0 -5 0 383.66 9.8
 0 5 0 402.36 9.4
 0 5 0 394.66 9.2
 0 5 0 400.06 9.2
 -1 -5 0 10.2 1.4
 -1 -5 0 11 2
 -1 -5 0 10.8 1.2
 -1 -5 0 8.4 1.4
 -1 -5 0 11 1.6
 1 5 0 10.1 1.3
 1 5 0 10.1 1.5
 1 5 0 7 1.1
 -2 -5 0 415.26 10.5
 -2 -5 0 424.06 10.3
 -2 -5 0 421.56 9.8
 -2 -5 0 418.96 10.5
 2 5 0 418.16 9.8
 2 5 0 428.76 9.9
 -3 -5 0 657.43 15
 -3 -5 0 658.93 15.4
 -3 -5 0 627.24 15.4
 -3 -5 0 652.83 15.6
 3 5 0 641.34 14.9
 -4 -5 0 706.63 17.3
 -4 -5 0 738.33 16.9
 -4 -5 0 753.52 17.3
 -4 -5 0 711.53 16.8
 -4 -5 0 740.03 17.6
 4 5 0 723.23 16.9
 -5 -5 0 434.46 10.6
 -5 -5 0 394.36 9.7
 -5 -5 0 402.06 10
 -5 -5 0 396.16 10.5
 -5 -5 0 391.96 10.7
 5 5 0 393.56 10
 -6 -5 0 221.38 6.3
 -6 -5 0 210.08 5.9
 -6 -5 0 208.88 7.2
 6 5 0 212.88 6.4
 -7 -5 0 3.7 1.7
 -7 -5 0 3.4 1.5
 -7 -5 0 4.9 2.4
 7 5 0 4.4 1.9
 -8 -5 0 2.9 2.5
 -8 -5 0 0.7 1.6
 -8 -5 0 3.1 1.9
 8 5 0 -0.4 1.9
 -9 -5 0 46.6 4.5
 -9 -5 0 50.49 5.5
 -9 -5 0 42.8 3.6
 9 5 0 41.9 4.6
 -10 -5 0 148.99 5.7
 -10 -5 0 132.49 7.6
 -10 -5 0 141.79 6.6
 10 5 0 142.69 6.8
 -11 -5 0 96.49 5.3
 -11 -5 0 113.29 6.5
 -11 -5 0 99.29 7.3
 11 5 0 98.59 6.6
 -12 -5 0 164.98 6.7
 -12 -5 0 146.59 8.8
 -12 -5 0 158.08 8.1
 12 5 0 158.58 8.2
 -13 -5 0 60.79 7.6
 -13 -5 0 56.09 5.5
 -13 -5 0 55.39 7
 13 5 0 47.9 7.1
 -14 -5 0 191.68 8.2
 -14 -5 0 194.18 10.8
 14 5 0 185.08 10.2
 -15 -5 0 68.39 9.5
 -15 -5 0 66.89 6.8
 15 5 0 73.49 9.1
 -16 -5 0 1.1 4
 -16 -5 0 2.1 5.7
 16 5 0 11.6 5.3
 -17 -5 0 31 7
 -17 -5 0 50.29 7.8
 17 5 0 33.7 6.5
 16 -6 0 -3.6 5.3
 -16 6 0 2.2 5.7
 -16 6 0 6.7 5
 15 -6 0 0.9 5
 -15 6 0 3.5 4.5
 -15 6 0 -0.3 5.1
 14 -6 0 44.9 5.8
 14 -6 0 50.39 8.5
 -14 6 0 51.49 6.3
 -14 6 0 51.39 7.2
 13 -6 0 85.29 8.5
 13 -6 0 81.79 8.2
 -13 6 0 86.19 7.4
 -13 6 0 78.69 8.8
 12 -6 0 575.84 16.9
 12 -6 0 557.84 16.1
 -12 6 0 561.44 17.3
 -12 6 0 556.44 15.7
 11 -6 0 194.68 9.2
 11 -6 0 196.28 8.3
 -11 6 0 211.48 8.3
 -11 6 0 190.48 9.4
 10 -6 0 385.96 11.6
 10 -6 0 392.46 12.2
 -10 6 0 379.16 11.3
 -10 6 0 378.26 12.5
 9 -6 0 36.7 5.1
 9 -6 0 24.1 4.4
 -9 6 0 31.1 4.3
 -9 6 0 39.2 5.5
 8 -6 0 1.5 1.7
 8 -6 0 -0.6 2
 8 -6 0 0.5 2.4
 -8 6 0 -1.5 2.1
 -8 6 0 1 2.5
 7 -6 0 49.4 3.6
 7 -6 0 50.99 4
 7 -6 0 49.7 4.5
 -7 6 0 46.4 3.8
 -7 6 0 42 3.8
 -7 6 0 46.3 4.7
 6 -6 0 9 2
 6 -6 0 6.2 1.6
 6 -6 0 6 2.1
 -6 6 0 7.7 2.2
 -6 6 0 6.9 1.9
 5 -6 0 304.47 8.3
 5 -6 0 296.17 8.9
 5 -6 0 293.77 8.4
 5 -6 0 294.77 7.9
 -5 6 0 297.27 8.6
 -5 6 0 294.37 8.1
 4 -6 0 185.98 4.9
 4 -6 0 190.28 6.4
 4 -6 0 186.08 6
 4 -6 0 179.08 5.3
 4 -6 0 178.18 5.7
 -4 6 0 179.48 5.9
 -4 6 0 193.88 6.1
 -4 6 0 189.18 5.5
 3 -6 0 1696.43 38.1
 3 -6 0 1649.83 37
 3 -6 0 1590.74 37.7
 3 -6 0 1713.33 37.7
 3 -6 0 1645.54 37.4
 3 -6 0 1626.24 37.9
 -3 6 0 1647.34 37.6
 -3 6 0 1712.53 37.8
 -3 6 0 1674.43 37.4
 2 -6 0 803.02 18.3
 2 -6 0 774.82 17.9
 2 -6 0 800.02 18.9
 2 -6 0 759.02 18.5
 2 -6 0 793.12 18.1
 2 -6 0 784.52 18.8
 -2 6 0 804.22 18.4
 -2 6 0 775.42 18.2
 1 -6 0 4.2 1.1
 1 -6 0 5.1 1.2
 1 -6 0 4.1 1.6
 1 -6 0 4.3 1.6
 1 -6 0 5.2 1.6
 1 -6 0 6.9 1.5
 1 -6 0 3.9 1.2
 -1 6 0 8.3 1.3
 -1 6 0 5.8 1.1
 0 -6 0 700.83 17.2
 0 -6 0 702.63 16.9
 0 -6 0 734.83 16.9
 0 -6 0 743.93 16.5
 0 -6 0 746.73 17
 0 -6 0 703.13 17.3
 0 6 0 757.92 16.8
 0 6 0 731.83 16.7
 -1 -6 0 491.05 12.4
 -1 -6 0 510.25 12.1
 -1 -6 0 511.15 11.5
 -1 -6 0 491.45 12.4
 -1 -6 0 518.85 12.1
 1 6 0 536.35 11.9
 1 6 0 477.05 11.8
 1 6 0 494.75 12
 -2 -6 0 585.34 14.6
 -2 -6 0 579.14 14.5
 -2 -6 0 603.34 13.6
 -2 -6 0 592.54 14.2
 2 6 0 610.44 13.9
 2 6 0 614.84 13.9
 -3 -6 0 171.68 5.3
 -3 -6 0 153.88 4.6
 -3 -6 0 166.08 5.6
 -3 -6 0 161.08 5.3
 3 6 0 165.88 4.6
 -4 -6 0 135.69 4.8
 -4 -6 0 119.49 4.8
 -4 -6 0 128.79 4.2
 -4 -6 0 125.59 5.1
 4 6 0 124.39 4.1
 -5 -6 0 488.75 12.8
 -5 -6 0 477.95 11.8
 -5 -6 0 492.15 12.5
 -5 -6 0 491.25 11.9
 -5 -6 0 488.55 12.5
 5 6 0 488.85 11.9
 -6 -6 0 946.71 21.9
 -6 -6 0 964.7 22.1
 -6 -6 0 939.01 23
 -6 -6 0 952.3 22.8
 -6 -6 0 949.9 22.7
 6 6 0 944.01 22.2
 -7 -6 0 590.94 14.8
 -7 -6 0 585.34 14.4
 -7 -6 0 637.04 15.5
 -7 -6 0 591.44 15.8
 7 6 0 603.54 15
 -9 -6 0 48 5.7
 -9 -6 0 32.5 4.4
 -9 -6 0 46.6 3.8
 9 6 0 44.2 4.7
 -10 -6 0 84.29 6.6
 -10 -6 0 81.99 4.8
 -10 -6 0 76.89 5.6
 10 6 0 76.29 5.8
 -11 -6 0 94.99 5.3
 -11 -6 0 92.49 6.4
 -11 -6 0 90.69 7.2
 11 6 0 88.89 6.5
 -12 -6 0 365.16 12.9
 -12 -6 0 375.66 12.1
 -12 -6 0 366.06 10.8
 12 6 0 375.36 12.3
 -13 -6 0 93.39 8.3
 -13 -6 0 91.99 6.1
 13 6 0 72.49 7.6
 -14 -6 0 152.88 10
 -14 -6 0 149.09 7.6
 14 6 0 147.29 9.6
 -15 -6 0 67.89 10.1
 -15 -6 0 68.19 9.8
 -15 -6 0 72.09 7
 15 6 0 75.59 9.3
 -16 -6 0 34.5 4.8
 -16 -6 0 35.1 7.4
 -16 -6 0 40.7 6.9
 16 6 0 29.6 5.9
 16 -7 0 31.7 6.3
 -16 7 0 39.1 7
 -16 7 0 43.3 5.9
 15 -7 0 -5 4.9
 -15 7 0 -0.4 5.3
 -15 7 0 -5.5 4.4
 14 -7 0 22.6 5.2
 14 -7 0 20.1 5.2
 -14 7 0 27.4 5.7
 -14 7 0 28.1 4.8
 13 -7 0 224.68 11.2
 13 -7 0 232.68 11
 -13 7 0 233.08 10
 -13 7 0 249.68 11.7
 12 -7 0 393.76 13.4
 12 -7 0 443.36 14.1
 -12 7 0 398.26 14.3
 -12 7 0 412.16 12.8
 11 -7 0 354.36 11.6
 11 -7 0 371.36 12.4
 -11 7 0 362.46 11.4
 -11 7 0 357.96 12.8
 10 -7 0 336.47 10.6
 10 -7 0 321.27 11.2
 -10 7 0 308.37 11.5
 -10 7 0 329.37 10.3
 9 -7 0 77.89 6.1
 9 -7 0 91.09 5.6
 -9 7 0 76.79 6.4
 -9 7 0 91.09 5.6
 8 -7 0 4.2 2.6
 8 -7 0 9.5 2.5
 8 -7 0 8.9 2.1
 -8 7 0 7.1 2.4
 -8 7 0 6.7 2.8
 7 -7 0 2.9 1.7
 7 -7 0 1.1 2.3
 7 -7 0 7.9 2.3
 -7 7 0 3.8 2.4
 -7 7 0 6.8 2.2
 6 -7 0 32.3 4
 6 -7 0 33.9 4.6
 6 -7 0 40.4 2.3
 6 -7 0 44.2 3.9
 6 -7 0 29.4 3.2
 -6 7 0 38.1 3.6
 -6 7 0 32.4 4.2
 5 -7 0 344.87 10.2
 5 -7 0 348.47 9
 5 -7 0 335.07 9.4
 5 -7 0 335.87 9.7
 5 -7 0 349.07 8.3
 -5 7 0 342.57 9.7
 -5 7 0 350.76 9.3
 4 -7 0 214.38 7
 4 -7 0 223.08 6.6
 4 -7 0 219.08 5.7
 4 -7 0 223.58 7.4
 -4 7 0 229.88 6.9
 -4 7 0 220.68 6.8
 -4 7 0 209.68 6.4
 3 -7 0 656.83 16.6
 3 -7 0 685.93 16.9
 3 -7 0 659.23 16.4
 3 -7 0 681.63 16.2
 3 -7 0 671.23 16
 3 -7 0 672.83 15.5
 -3 7 0 676.33 16
 -3 7 0 688.13 16.4
 -3 7 0 668.33 16.2
 2 -7 0 728.53 17.8
 2 -7 0 738.63 18
 2 -7 0 731.63 18.1
 2 -7 0 746.93 17
 2 -7 0 734.63 17.1
 2 -7 0 734.73 17.3
 -2 7 0 733.13 17.3
 -2 7 0 747.73 17.4
 1 -7 0 286.87 8.4
 1 -7 0 317.57 8.6
 1 -7 0 280.47 7.5
 1 -7 0 335.97 8.1
 1 -7 0 315.97 7.8
 1 -7 0 282.07 7.7
 -1 7 0 304.57 7.8
 -1 7 0 309.37 7.7
 0 -7 0 625.94 14.8
 0 -7 0 603.64 15.2
 0 -7 0 647.74 15.3
 0 -7 0 693.23 15.5
 0 -7 0 691.03 16
 0 -7 0 650.23 15.8
 0 7 0 642.94 15.2
 0 7 0 633.24 15
 -1 -7 0 159.88 5.6
 -1 -7 0 168.08 4.4
 -1 -7 0 163.78 5.1
 -1 -7 0 161.78 5.2
 -1 -7 0 165.88 5.7
 1 7 0 163.78 4.9
 1 7 0 181.58 5.2
 1 7 0 162.78 4.7
 -2 -7 0 67.39 3.9
 -2 -7 0 73.99 3.8
 -2 -7 0 69.49 3.5
 -2 -7 0 76.49 2.6
 2 7 0 69.69 3.1
 2 7 0 77.79 3.4
 -3 -7 0 45.3 3.7
 -3 -7 0 37.8 3.2
 -3 -7 0 39.6 3.3
 -3 -7 0 39 2.2
 3 7 0 42.4 2.4
 -4 -7 0 31.2 2.6
 -4 -7 0 30 3.3
 -4 -7 0 27 3.7
 -4 -7 0 32.5 3.4
 4 7 0 33.2 2.4
 -5 -7 0 204.18 6.8
 -5 -7 0 206.58 6
 -5 -7 0 205.48 6.8
 -5 -7 0 199.88 7.1
 5 7 0 196.28 5.9
 -6 -7 0 519.25 13.7
 -6 -7 0 529.75 13.7
 -6 -7 0 523.95 14
 -6 -7 0 525.15 12.9
 6 7 0 511.95 12.9
 -7 -7 0 726.13 17.3
 -7 -7 0 727.03 17.5
 -7 -7 0 732.83 18.3
 -7 -7 0 724.13 18.7
 7 7 0 718.33 17.6
 -8 -7 0 83.89 6.1
 8 7 0 85.59 4.9
 -9 -7 0 158.38 7.8
 -9 -7 0 155.18 7.5
 -9 -7 0 142.29 5.8
 -9 -7 0 166.68 6.5
 9 7 0 171.28 6.9
 -10 -7 0 89.79 5.8
 -10 -7 0 104.79 7.3
 -10 -7 0 99.09 7.1
 -10 -7 0 93.79 5.2
 10 7 0 103.99 6.3
 -11 -7 0 84.89 5.3
 -11 -7 0 75.49 7.3
 -11 -7 0 67.49 8.5
 -11 -7 0 65.99 7.5
 11 7 0 73.69 6.5
 -12 -7 0 41.8 7.3
 -12 -7 0 29.6 3.5
 -12 -7 0 44.9 7.8
 12 7 0 33.7 4.3
 -13 -7 0 39 5.6
 -13 -7 0 32.1 5.9
 -13 -7 0 34.1 5.5
 13 7 0 30.5 4.6
 -14 -7 0 103.69 7.1
 -14 -7 0 101.49 9.9
 -14 -7 0 96.69 9.8
 14 7 0 108.09 8.9
 -15 -7 0 55.19 7.5
 -15 -7 0 62.99 9.9
 -15 -7 0 63.19 7.1
 15 7 0 50.49 9.1
 -16 -7 0 92.49 11.2
 -16 -7 0 104.19 11.4
 16 7 0 101.69 10.7
 15 -8 0 67.39 10.2
 15 -8 0 73.49 9.5
 -15 8 0 71.79 8.8
 -15 8 0 66.49 10.7
 14 -8 0 -1.9 4.7
 14 -8 0 1.7 4.7
 14 -8 0 3.9 5.1
 -14 8 0 7.9 5.3
 -14 8 0 6.6 4.5
 13 -8 0 13 4.8
 13 -8 0 25.2 5.3
 13 -8 0 16.6 4.8
 -13 8 0 21.2 4.4
 -13 8 0 15.8 5.1
 12 -8 0 146.09 9.1
 12 -8 0 146.29 9.5
 -12 8 0 157.38 8.3
 -12 8 0 135.19 9.4
 11 -8 0 341.37 11.6
 11 -8 0 358.16 12.3
 11 -8 0 340.77 12.5
 -11 8 0 348.17 12.7
 -11 8 0 330.47 11.3
 10 -8 0 430.96 13.1
 10 -8 0 420.76 12.6
 10 -8 0 424.06 13.7
 -10 8 0 383.56 12.2
 -10 8 0 385.06 13.3
 9 -8 0 354.76 11.4
 9 -8 0 355.96 11.1
 9 -8 0 370.26 12.1
 -9 8 0 344.17 10.7
 -9 8 0 356.06 11.9
 8 -8 0 17.9 3.1
 8 -8 0 21 3.9
 8 -8 0 13.4 3.4
 8 -8 0 27.8 4.6
 -8 8 0 29.5 4.5
 -8 8 0 17.9 3.2
 7 -8 0 74.39 5.3
 7 -8 0 85.39 4.4
 7 -8 0 71.49 5.1
 7 -8 0 84.79 6.1
 -7 8 0 81.89 4.7
 -7 8 0 66.79 5.4
 6 -8 0 8 1.4
 6 -8 0 9.1 2.4
 6 -8 0 7.2 2.7
 6 -8 0 5 2.3
 -6 8 0 6.1 2.2
 -6 8 0 8 2.5
 5 -8 0 52.79 4.3
 5 -8 0 54.19 3.9
 5 -8 0 55.89 2.7
 5 -8 0 48.5 4.7
 -5 8 0 51.39 4.3
 -5 8 0 49.2 3.7
 4 -8 0 88.99 3.3
 4 -8 0 85.99 5.1
 4 -8 0 85.89 4.7
 4 -8 0 94.19 5.1
 4 -8 0 80.69 4.5
 4 -8 0 86.19 4.1
 -4 8 0 88.29 4.5
 -4 8 0 88.89 4.4
 -4 8 0 87.29 4
 3 -8 0 418.66 10.7
 3 -8 0 412.76 11.5
 3 -8 0 412.86 10.1
 3 -8 0 410.26 10.5
 3 -8 0 402.06 11.3
 3 -8 0 404.86 11.1
 -3 8 0 413.46 10.7
 -3 8 0 427.96 10.9
 -3 8 0 412.26 10.5
 2 -8 0 404.06 11.1
 2 -8 0 420.16 11.4
 2 -8 0 416.16 10.3
 2 -8 0 415.96 10.2
 2 -8 0 420.46 11.5
 2 -8 0 412.36 10.5
 -2 8 0 409.66 10.5
 -2 8 0 419.36 10.6
 1 -8 0 1319.37 29.8
 1 -8 0 1253.77 29
 1 -8 0 1262.57 28.9
 1 -8 0 1318.47 28.5
 1 -8 0 1228.98 29.4
 1 -8 0 1246.98 28.7
 -1 8 0 1245.38 28.9
 -1 8 0 1242.38 28.7
 0 -8 0 256.87 7.3
 0 -8 0 241.98 7.6
 0 -8 0 267.27 6.5
 0 8 0 264.67 6.9
 0 8 0 254.17 6.7
 -1 -8 0 332.47 8.8
 -1 -8 0 330.57 9.4
 -1 -8 0 321.37 9.2
 1 8 0 335.17 8.5
 1 8 0 330.27 8.3
 -2 -8 0 5.2 2
 -2 -8 0 6.9 2.1
 -2 -8 0 4.7 1.9
 2 8 0 4.4 1.6
 2 8 0 3.7 1.3
 -3 -8 0 111.99 4.7
 -3 -8 0 109.09 4.9
 -3 -8 0 111.49 5
 3 8 0 108.09 3.9
 -4 -8 0 258.17 8.1
 -4 -8 0 272.27 8.4
 -4 -8 0 260.67 6.9
 -4 -8 0 263.87 7.9
 4 8 0 262.57 7.1
 -5 -8 0 228.88 7.8
 -5 -8 0 219.78 6.4
 -5 -8 0 225.38 7.5
 -5 -8 0 213.28 7.2
 5 8 0 217.68 6.4
 -6 -8 0 851.31 21.5
 -6 -8 0 875.51 20.5
 -6 -8 0 847.92 21.3
 -6 -8 0 897.61 21.2
 6 8 0 859.41 20.5
 -7 -8 0 294.37 8.6
 -7 -8 0 301.47 10
 -7 -8 0 295.97 9.5
 -7 -8 0 304.27 9.5
 7 8 0 312.77 8.8
 -8 -8 0 126.99 5.4
 -8 -8 0 126.59 5.6
 -8 -8 0 138.49 7.2
 -8 -8 0 128.19 6.6
 8 8 0 134.69 5.9
 -9 -8 0 7.6 2.8
 -9 -8 0 -2.2 3.6
 -9 -8 0 0.2 3.6
 -9 -8 0 3.7 2.4
 9 8 0 2.7 2.5
 -10 -8 0 66.79 6.8
 -10 -8 0 73.19 7.2
 -10 -8 0 70.39 5.1
 10 8 0 70.39 5.8
 -11 -8 0 15.7 4.8
 -11 -8 0 17 3.1
 -11 -8 0 13.5 4.6
 11 8 0 15.2 3.5
 -12 -8 0 17.8 4.9
 -12 -8 0 8.5 5.1
 -12 -8 0 12.8 3.3
 12 8 0 2.7 3.6
 -13 -8 0 26.6 3.9
 -13 -8 0 25.5 5.8
 -13 -8 0 31 5.6
 13 8 0 21.3 4.5
 -14 -8 0 155.08 8.1
 -14 -8 0 136.19 10.6
 -14 -8 0 154.48 11.3
 14 8 0 134.49 9.8
 -15 -8 0 165.38 11.8
 -15 -8 0 171.38 12.1
 15 8 0 155.78 10.8
 -16 -8 0 146.59 12.4
 -16 -8 0 134.49 12
 16 8 0 134.69 11.2
 15 -9 0 125.59 11.1
 15 -9 0 138.59 11.3
 -15 9 0 142.29 10
 -15 9 0 131.99 12.1
 14 -9 0 5.9 4.9
 14 -9 0 2.8 5.1
 14 -9 0 -4.3 4.8
 -14 9 0 6.3 4.6
 -14 9 0 -0.4 5.2
 13 -9 0 2.1 4.6
 13 -9 0 5.5 4.8
 13 -9 0 0.1 4.4
 -13 9 0 1.1 4.1
 -13 9 0 1.6 4.9
 12 -9 0 77.79 8.6
 12 -9 0 73.59 8.2
 12 -9 0 75.59 8.2
 -12 9 0 77.39 8.7
 -12 9 0 80.79 7.4
 11 -9 0 236.48 10.9
 11 -9 0 238.18 10.3
 11 -9 0 218.18 9.5
 -11 9 0 245.58 9.6
 -11 9 0 228.48 10.6
 10 -9 0 308.27 11.6
 10 -9 0 292.27 10.5
 10 -9 0 302.87 11
 -10 9 0 299.07 11.5
 -10 9 0 295.57 10.3
 9 -9 0 176.78 7.8
 9 -9 0 185.38 8.2
 9 -9 0 190.58 9.1
 -9 9 0 174.98 8.6
 -9 9 0 186.78 7.6
 8 -9 0 271.27 10
 8 -9 0 260.77 9.2
 8 -9 0 251.97 9.1
 -8 9 0 247.18 9.6
 -8 9 0 269.87 8.8
 7 -9 0 234.08 8.3
 7 -9 0 228.08 6.2
 7 -9 0 228.48 9.1
 7 -9 0 238.78 8.2
 -7 9 0 231.48 8.6
 -7 9 0 228.48 7.9
 6 -9 0 165.38 7.6
 6 -9 0 166.58 6.9
 6 -9 0 160.78 6.6
 6 -9 0 168.98 4.9
 -6 9 0 173.28 6.3
 -6 9 0 161.98 7
 5 -9 0 33.7 4.9
 5 -9 0 36.3 4.4
 5 -9 0 28 3.9
 5 -9 0 29.7 2.6
 -5 9 0 26.8 3.6
 -5 9 0 34.2 4
 -5 9 0 23.8 4.2
 4 -9 0 51.19 4.5
 4 -9 0 60.49 4.9
 4 -9 0 50.49 3.8
 4 -9 0 54.79 4.4
 4 -9 0 53.29 3.7
 4 -9 0 49 3
 -4 9 0 52.79 4.1
 -4 9 0 56.19 4.1
 -4 9 0 52.69 3.6
 3 -9 0 110.19 5.8
 3 -9 0 116.59 4.5
 3 -9 0 117.99 5.7
 3 -9 0 117.69 5.5
 3 -9 0 120.29 4.6
 3 -9 0 117.79 4.2
 -3 9 0 111.09 4.5
 -3 9 0 121.69 4.9
 -3 9 0 119.79 4.8
 2 -9 0 1266.57 28.9
 2 -9 0 1290.47 29.3
 2 -9 0 1264.67 30.3
 2 -9 0 1241.38 29.9
 2 -9 0 1270.07 29
 -2 9 0 1277.87 29.2
 -2 9 0 1291.57 29.4
 1 -9 0 1484.05 34.1
 1 -9 0 1505.95 34.4
 1 -9 0 1498.45 35.2
 1 -9 0 1478.65 34.9
 1 -9 0 1508.45 34.4
 1 -9 0 1524.15 33.8
 -1 9 0 1482.25 34
 -1 9 0 1541.45 34.3
 0 -9 0 405.56 11.4
 0 -9 0 412.36 9.8
 0 -9 0 396.66 10.5
 0 -9 0 390.56 11.1
 0 -9 0 421.36 10.8
 0 9 0 420.76 10.2
 0 9 0 418.46 10.3
 -1 -9 0 577.44 14.9
 -1 -9 0 549.05 14.7
 -1 -9 0 586.74 14.3
 1 9 0 569.14 13.7
 1 9 0 591.84 13.9
 -2 -9 0 11 2.5
 -2 -9 0 14 2.4
 -2 -9 0 14.9 2.4
 2 9 0 15.3 2.8
 2 9 0 12.6 2.3
 -3 -9 0 89.09 5
 -3 -9 0 96.49 4.7
 -3 -9 0 95.99 5.2
 3 9 0 93.69 4.3
 3 9 0 85.49 4
 -4 -9 0 7.3 2.6
 -4 -9 0 3.3 2.6
 -4 -9 0 2.9 1.3
 -4 -9 0 5.2 2.3
 4 9 0 5 1.5
 -5 -9 0 72.29 5.2
 -5 -9 0 76.89 5.4
 -5 -9 0 69.99 4.9
 -5 -9 0 66.69 3.5
 5 9 0 76.99 3.7
 -6 -9 0 581.44 15.6
 -6 -9 0 559.94 15.3
 -6 -9 0 595.24 15.1
 -6 -9 0 548.65 14.1
 6 9 0 567.44 14.2
 -7 -9 0 864.11 22.2
 -7 -9 0 862.81 22
 -7 -9 0 880.41 21.7
 7 9 0 860.41 20.8
 -8 -9 0 445.56 13.3
 -8 -9 0 462.35 13.7
 8 9 0 445.86 12.3
 -9 -9 0 3.6 4
 -9 -9 0 5.3 3.8
 9 9 0 8.9 2.7
 -10 -9 0 25.7 4.9
 -10 -9 0 25.1 3.4
 -10 -9 0 27.2 4.8
 10 9 0 38.6 5.6
 -11 -9 0 15.7 5
 -11 -9 0 18.1 4.9
 -11 -9 0 12.1 3.3
 11 9 0 12.1 3.4
 -12 -9 0 4 5.1
 -12 -9 0 4.7 4.8
 -12 -9 0 2.9 3.4
 12 9 0 3.4 3.7
 -13 -9 0 8.7 5.8
 -13 -9 0 2.7 5.1
 -13 -9 0 8.6 4
 13 9 0 9.9 4.2
 -14 -9 0 46.6 7.3
 -14 -9 0 42.2 6.8
 14 9 0 36.5 5.2
 -15 -9 0 73.29 11.2
 -15 -9 0 58.39 8.1
 15 9 0 49.4 9.2
 14 -10 0 146.09 11.1
 14 -10 0 179.18 10.8
 14 -10 0 161.18 11
 -14 10 0 156.28 12
 -14 10 0 156.38 10
 13 -10 0 10.6 5.4
 13 -10 0 7.5 4.7
 13 -10 0 4.4 4.7
 -13 10 0 5.7 5
 -13 10 0 3.8 4.3
 12 -10 0 20.7 4.7
 12 -10 0 13.5 5.2
 12 -10 0 11 4.6
 -12 10 0 23.4 5.1
 -12 10 0 20.1 4.4
 11 -10 0 84.39 8
 11 -10 0 99.39 8.7
 -11 10 0 99.59 7.3
 -11 10 0 93.59 8.6
 10 -10 0 82.89 7.8
 10 -10 0 54.89 6.9
 10 -10 0 71.09 6.6
 -10 10 0 71.89 6.3
 -10 10 0 67.69 7.6
 9 -10 0 603.34 17.6
 9 -10 0 602.74 16.7
 9 -10 0 591.74 16.6
 -9 10 0 580.14 16.1
 -9 10 0 587.84 17.1
 8 -10 0 69.79 6.9
 8 -10 0 56.19 5.7
 8 -10 0 65.19 5.8
 -8 10 0 65.39 5.5
 -8 10 0 51.49 6.2
 7 -10 0 478.05 13.8
 7 -10 0 481.75 13.4
 7 -10 0 480.45 14.6
 -7 10 0 485.05 13.9
 -7 10 0 474.95 13.2
 6 -10 0 234.08 6.6
 6 -10 0 252.97 9.6
 6 -10 0 254.67 8.9
 6 -10 0 225.38 8.2
 -6 10 0 244.08 8.7
 -6 10 0 243.38 8
 5 -10 0 92.79 3.9
 5 -10 0 92.69 5.9
 5 -10 0 81.19 5
 5 -10 0 97.99 6.3
 -5 10 0 86.99 4.9
 -5 10 0 93.59 5.5
 -5 10 0 93.19 5.4
 4 -10 0 -0.5 2.5
 4 -10 0 1 1.6
 4 -10 0 -1.5 2.4
 4 -10 0 0.9 1.8
 4 -10 0 5.8 2.8
 -4 10 0 0.9 2
 -4 10 0 -0.8 1.9
 -4 10 0 1.3 2.1
 3 -10 0 61.29 3.7
 3 -10 0 67.69 5.4
 3 -10 0 62.09 3.7
 3 -10 0 62.99 5
 3 -10 0 65.29 3.6
 -3 10 0 67.49 4.1
 -3 10 0 62.49 4.1
 -3 10 0 69.69 3.9
 2 -10 0 489.25 12.1
 2 -10 0 505.75 13.9
 2 -10 0 478.85 12.3
 2 -10 0 483.05 13.3
 2 -10 0 493.05 12.5
 -2 10 0 498.45 12.5
 -2 10 0 503.35 12.7
 -2 10 0 499.85 12.4
 1 -10 0 218.68 7.1
 1 -10 0 234.38 7
 1 -10 0 226.68 7.8
 1 -10 0 227.08 6.2
 1 -10 0 217.18 8
 1 -10 0 219.48 6.8
 -1 10 0 224.68 6.6
 -1 10 0 223.38 6.7
 0 -10 0 246.28 8.2
 0 -10 0 252.37 8.5
 0 -10 0 249.28 7.7
 0 10 0 257.47 7.2
 0 10 0 248.68 7
 -1 -10 0 610.64 16.4
 -1 -10 0 627.84 15.8
 -1 -10 0 604.94 16.2
 1 10 0 628.04 15.1
 1 10 0 687.33 16
 -2 -10 0 158.28 6.1
 -2 -10 0 171.18 6.7
 -2 -10 0 156.88 6.6
 2 10 0 153.68 5
 -3 -10 0 470.05 13
 -3 -10 0 474.75 13.1
 -3 -10 0 477.75 12.5
 3 10 0 453.55 11.8
 -4 -10 0 39.7 4.8
 -4 -10 0 48.1 5.1
 -4 -10 0 44.1 4.5
 4 10 0 47.4 3.5
 -5 -10 0 58.69 5.3
 -5 -10 0 66.19 5.7
 -5 -10 0 59.39 5.1
 5 10 0 59.59 3.9
 -6 -10 0 468.85 13.1
 -6 -10 0 459.05 13.6
 -6 -10 0 468.45 13.6
 6 10 0 453.85 12
 -7 -10 0 408.46 12.5
 -7 -10 0 399.66 12.7
 -7 -10 0 400.36 12.2
 7 10 0 387.56 11
 -8 -10 0 248.88 9.4
 -8 -10 0 238.48 9.9
 -8 -10 0 245.78 9.7
 8 10 0 243.18 8.2
 -9 -10 0 163.78 8.8
 -9 -10 0 152.68 8.3
 9 10 0 161.38 7.1
 -10 -10 0 161.58 9
 -10 -10 0 144.29 9.3
 10 10 0 157.88 7.6
 -11 -10 0 56.49 8.5
 -11 -10 0 53.89 8.2
 11 10 0 65.29 6.9
 -12 -10 0 38 6.3
 -12 -10 0 35.6 6
 12 10 0 40.4 7.2
 -13 -10 0 7.9 5.6
 -13 -10 0 2.3 6.1
 13 10 0 1.5 4.1
 -14 -10 0 87.09 10.7
 -14 -10 0 65.89 10.7
 14 10 0 74.29 9.2
 -15 -10 0 122.89 12.1
 -15 -10 0 118.99 12.3
 15 10 0 106.59 10.4
 14 -11 0 256.17 13.8
 -14 11 0 261.67 11.8
 -14 11 0 270.37 13.8
 13 -11 0 39.5 6.6
 -13 11 0 34.6 5.2
 -13 11 0 26.4 5.9
 12 -11 0 9 5.4
 -12 11 0 -2.6 4
 -12 11 0 1.2 4.5
 11 -11 0 60.39 9
 11 -11 0 48.6 6.8
 -11 11 0 50.09 8.2
 -11 11 0 60.99 7
 10 -11 0 22.9 4.4
 10 -11 0 26.8 4.2
 10 -11 0 31.2 5.3
 -10 11 0 26.5 4.6
 -10 11 0 32.7 4.2
 9 -11 0 66.99 6.7
 9 -11 0 86.49 8.3
 9 -11 0 68.69 6.5
 -9 11 0 75.39 7.4
 -9 11 0 79.99 6.2
 8 -11 0 526.65 14.9
 8 -11 0 537.05 16.4
 8 -11 0 525.35 15.4
 -8 11 0 526.75 15.5
 -8 11 0 525.55 14.7
 7 -11 0 973.6 24.5
 7 -11 0 1026.1 26.1
 7 -11 0 996.5 25.3
 -7 11 0 998.3 25.1
 -7 11 0 1000.7 24.5
 6 -11 0 573.74 16.2
 6 -11 0 570.44 15.2
 6 -11 0 592.04 16.9
 6 -11 0 579.44 15.6
 -6 11 0 583.74 15.9
 -6 11 0 587.24 15.3
 5 -11 0 87.29 6.4
 5 -11 0 92.09 4.1
 5 -11 0 88.59 5.3
 5 -11 0 93.59 6.8
 -5 11 0 92.39 5.8
 -5 11 0 99.69 5.3
 4 -11 0 88.39 4.2
 4 -11 0 94.39 6
 4 -11 0 91.49 4.8
 4 -11 0 93.59 6.6
 -4 11 0 105.39 5
 -4 11 0 95.29 5.3
 3 -11 0 328.07 10.7
 3 -11 0 352.16 11.3
 3 -11 0 338.67 9.3
 3 -11 0 337.87 9.2
 -3 11 0 341.87 9.7
 -3 11 0 354.56 9.6
 2 -11 0 297.37 8.2
 2 -11 0 315.57 10.4
 2 -11 0 305.97 8.6
 2 -11 0 297.97 8.8
 2 -11 0 297.07 9.9
 -2 11 0 310.97 8.7
 -2 11 0 315.27 8.6
 1 -11 0 510.95 14
 1 -11 0 509.35 12.3
 1 -11 0 498.95 13
 1 -11 0 499.95 13
 1 -11 0 538.45 14.5
 -1 11 0 502.95 12.8
 0 -11 0 362.56 11.1
 0 -11 0 332.67 10.6
 0 -11 0 363.56 10.2
 0 11 0 359.46 9.3
 -1 -11 0 361.66 11.4
 -1 -11 0 399.36 10.9
 -1 -11 0 390.86 11.7
 1 11 0 392.16 9.9
 -2 -11 0 163.38 6.4
 -2 -11 0 163.88 7.1
 -2 -11 0 158.78 7
 2 11 0 156.28 5.3
 -3 -11 0 774.92 18.7
 -3 -11 0 769.72 19.4
 -3 -11 0 749.73 19.3
 3 11 0 692.43 17.7
 -4 -11 0 276.67 9.8
 -4 -11 0 287.37 9.3
 -4 -11 0 295.27 9.8
 4 11 0 275.57 8.3
 -5 -11 0 37 5.3
 -5 -11 0 43.1 5.8
 -5 -11 0 32 5.1
 5 11 0 41.7 4
 -6 -11 0 130.09 7.6
 -6 -11 0 129.79 7
 -6 -11 0 129.09 7.3
 6 11 0 134.79 5.7
 -7 -11 0 716.93 19.4
 -7 -11 0 716.63 18.9
 -7 -11 0 700.63 19.2
 7 11 0 699.63 17.7
 -8 -11 0 110.29 7.5
 -8 -11 0 120.49 7.6
 -8 -11 0 113.49 8.1
 8 11 0 109.99 6.1
 -9 -11 0 124.59 8.8
 -9 -11 0 138.79 8.4
 9 11 0 130.79 6.8
 -10 -11 0 170.58 10.1
 -10 -11 0 164.48 9.5
 10 11 0 175.28 8.1
 -11 -11 0 105.59 9.3
 -11 -11 0 105.79 9.7
 11 11 0 118.29 7.7
 -12 -11 0 69.99 10.3
 -12 -11 0 77.39 9.5
 12 11 0 77.09 7.9
 -13 -11 0 37.9 7
 -13 -11 0 35.6 7.1
 13 11 0 30.3 5.1
 -14 -11 0 5.5 6.4
 -14 -11 0 4.1 7
 14 11 0 0 4.7
 -15 -11 0 67.39 11.4
 -15 -11 0 37.5 7.7
 15 11 0 38.8 6
 13 -12 0 117.39 11.3
 -13 12 0 105.19 11
 -13 12 0 98.19 9
 12 -12 0 41.5 6.6
 -12 12 0 34.7 5.7
 -12 12 0 34.2 5
 11 -12 0 8.2 5.3
 -11 12 0 5.2 4.4
 -11 12 0 4 4.1
 10 -12 0 53.29 8.5
 -10 12 0 46.8 5
 -10 12 0 44.9 7.8
 9 -12 0 26.3 5.2
 9 -12 0 27.7 4.4
 -9 12 0 40.2 7
 -9 12 0 34.1 4.2
 8 -12 0 284.77 10.8
 8 -12 0 297.47 11.9
 -8 12 0 294.57 10.1
 -8 12 0 284.67 10.9
 7 -12 0 245.88 10.1
 7 -12 0 261.67 11
 -7 12 0 252.27 9.7
 -7 12 0 254.27 9.1
 6 -12 0 1045.4 26.5
 6 -12 0 997.7 25.7
 -6 12 0 987.3 24.6
 -6 12 0 1000.1 25.2
 5 -12 0 98.19 4.7
 5 -12 0 115.19 7.7
 -5 12 0 110.19 5.7
 -5 12 0 105.79 6.3
 4 -12 0 282.67 10.1
 4 -12 0 282.37 8.3
 4 -12 0 302.57 10.8
 -4 12 0 287.77 9.3
 -4 12 0 294.57 8.9
 3 -12 0 225.68 9.2
 3 -12 0 206.68 8.6
 3 -12 0 204.88 6.9
 -3 12 0 211.88 7.3
 -3 12 0 219.78 7.2
 2 -12 0 193.78 8.4
 2 -12 0 193.38 8.1
 -2 12 0 189.78 6.5
 -2 12 0 189.38 6.7
 1 -12 0 278.57 10
 1 -12 0 266.67 9.4
 -1 12 0 277.77 8.1
 0 -12 0 681.23 18.4
 0 -12 0 655.63 17.9
 0 -12 0 699.53 17.4
 0 12 0 693.03 16.5
 -1 -12 0 275.47 9
 -1 -12 0 272.57 9.7
 -1 -12 0 279.27 9.9
 1 12 0 279.57 7.8
 -2 -12 0 321.07 10.7
 -2 -12 0 340.37 10
 -2 -12 0 331.47 10.9
 2 12 0 317.57 8.8
 -3 -12 0 429.46 12.1
 -3 -12 0 448.76 13.1
 -3 -12 0 430.36 12.9
 3 12 0 406.36 11
 -4 -12 0 99.19 6
 -4 -12 0 96.59 6.9
 -4 -12 0 97.69 6.9
 4 12 0 84.29 4.6
 -5 -12 0 37.5 6.3
 -5 -12 0 46.1 5.9
 -5 -12 0 36.6 5.6
 5 12 0 44.1 4.5
 -6 -12 0 55.69 6.9
 -6 -12 0 54.79 6.7
 -6 -12 0 44.8 6.1
 6 12 0 52.89 4.9
 -7 -12 0 15.8 4.4
 -7 -12 0 18.5 4.5
 -7 -12 0 14.2 4
 7 12 0 6.7 2.7
 -8 -12 0 120.49 8.5
 -8 -12 0 136.29 8.3
 -8 -12 0 146.09 9.6
 8 12 0 129.29 6.7
 -9 -12 0 315.47 12.8
 -9 -12 0 326.87 12.3
 9 12 0 332.77 10.6
 -10 -12 0 183.68 10.3
 -10 -12 0 172.08 11.1
 10 12 0 180.98 8.4
 -11 -12 0 163.48 11.3
 -11 -12 0 120.69 10
 11 12 0 137.59 8.2
 -12 -12 0 342.07 14.7
 -12 -12 0 346.47 14.7
 12 12 0 331.47 12.4
 -13 -12 0 62.19 10.7
 -13 -12 0 45.9 7.9
 13 12 0 53.89 8.5
 -14 -12 0 14.3 7.5
 -14 -12 0 7.7 6.8
 14 12 0 1 4.8
 13 -13 0 179.88 13
 -13 13 0 190.88 12.7
 -13 13 0 199.48 10.8
 12 -13 0 70.99 10.7
 -12 13 0 55.39 9.6
 -12 13 0 70.99 8.4
 11 -13 0 6 5.6
 -11 13 0 4.2 4.2
 -11 13 0 1.9 4.6
 10 -13 0 13.4 5.5
 -10 13 0 14.3 4.6
 -10 13 0 16.7 4.3
 9 -13 0 10 4.2
 9 -13 0 6.6 5
 -9 13 0 7.1 4
 -9 13 0 -0.4 3.5
 8 -13 0 144.39 9.8
 8 -13 0 141.29 8.8
 -8 13 0 150.08 7.8
 -8 13 0 149.69 8.6
 7 -13 0 363.96 12.7
 7 -13 0 385.06 13.8
 -7 13 0 359.96 11.5
 -7 13 0 356.16 12.2
 6 -13 0 867.61 23.6
 -6 13 0 846.72 22.1
 -6 13 0 855.41 21.6
 5 -13 0 594.44 17.9
 -5 13 0 602.94 16.3
 -5 13 0 595.84 15.8
 4 -13 0 39.9 6.9
 4 -13 0 37.9 6.1
 -4 13 0 40 4.6
 -4 13 0 38.3 5.1
 3 -13 0 132.49 8.2
 3 -13 0 125.39 7.6
 -3 13 0 133.19 6
 -3 13 0 125.09 6.1
 2 -13 0 7.1 3.6
 2 -13 0 11.7 3.7
 -2 13 0 16.1 2.6
 -2 13 0 12.2 2.4
 1 -13 0 92.59 7.2
 1 -13 0 109.49 7.1
 -1 13 0 93.29 5
 0 -13 0 453.75 12.9
 0 -13 0 457.45 14.1
 0 -13 0 452.65 13.7
 0 13 0 448.86 11.8
 -1 -13 0 177.38 8.2
 -1 -13 0 177.48 8.3
 -1 -13 0 158.18 7.2
 1 13 0 172.28 5.9
 -2 -13 0 399.96 11.9
 -2 -13 0 401.66 12.7
 -2 -13 0 400.56 12.9
 2 13 0 395.06 10.5
 -3 -13 0 451.95 12.8
 -3 -13 0 454.75 13.9
 -3 -13 0 431.16 13.6
 3 13 0 427.36 11.4
 -4 -13 0 640.34 18
 -4 -13 0 662.83 17.3
 -4 -13 0 683.33 18.3
 4 13 0 597.94 15.8
 -5 -13 0 68.99 6.7
 -5 -13 0 65.29 7.3
 -5 -13 0 76.79 7.3
 5 13 0 73.49 4.9
 -6 -13 0 2.9 3.7
 -6 -13 0 2.3 4.3
 -6 -13 0 -1.9 4.1
 6 13 0 4.1 2.6
 -7 -13 0 103.39 7.7
 -7 -13 0 96.69 8.5
 -7 -13 0 122.09 8.3
 7 13 0 89.89 6.3
 -8 -13 0 120.49 8.5
 -8 -13 0 119.59 9.3
 -8 -13 0 128.89 8.7
 8 13 0 113.19 6.9
 -9 -13 0 94.99 8.6
 -9 -13 0 97.89 8.8
 -9 -13 0 98.19 10
 9 13 0 97.69 7
 -10 -13 0 145.49 10.1
 -10 -13 0 132.89 10.6
 10 13 0 131.19 8
 -11 -13 0 236.28 12.3
 -11 -13 0 229.28 12.7
 11 13 0 231.68 10.1
 -12 -13 0 112.79 11.8
 -12 -13 0 141.59 11.8
 12 13 0 113.29 8.9
 -13 -13 0 261.97 14.5
 -13 -13 0 243.38 14.7
 13 13 0 226.58 11.5
 12 -14 0 167.78 12.5
 -12 14 0 163.58 11.7
 -12 14 0 178.98 10.3
 11 -14 0 19.1 6.3
 -11 14 0 10 5
 -11 14 0 11.9 4.6
 10 -14 0 31.1 6.3
 -10 14 0 21.5 4.9
 -10 14 0 46 7.3
 9 -14 0 36.6 6.3
 -9 14 0 35.6 4.7
 -9 14 0 35 5
 8 -14 0 14.8 5.4
 -8 14 0 20.1 4.2
 -8 14 0 20.1 4
 7 -14 0 227.98 11.4
 -7 14 0 208.78 9.5
 -7 14 0 208.28 8.8
 6 -14 0 587.84 18.1
 -6 14 0 556.94 16.1
 -6 14 0 541.25 15.5
 5 -14 0 394.36 14.2
 -5 14 0 382.36 12.2
 -5 14 0 401.16 11.8
 4 -14 0 253.77 11.4
 4 -14 0 273.57 10.7
 -4 14 0 263.77 9
 -4 14 0 276.57 9.5
 3 -14 0 182.18 9
 3 -14 0 179.78 9.5
 -3 14 0 173.18 7.2
 -3 14 0 174.18 7
 2 -14 0 2 3.8
 2 -14 0 0.5 3.8
 -2 14 0 0.7 2.3
 -2 14 0 2.5 2.4
 1 -14 0 9.2 4
 1 -14 0 8.5 3.9
 -1 14 0 5.7 2.3
 -1 14 0 5.2 2.3
 0 -14 0 164.58 9
 0 -14 0 159.58 8.4
 0 -14 0 151.38 7.4
 0 14 0 162.68 6.1
 -1 -14 0 81.69 7.4
 -1 -14 0 81.09 6.4
 -1 -14 0 78.69 6.7
 1 14 0 79.59 4.5
 -2 -14 0 301.37 11.3
 -2 -14 0 304.67 11.6
 -2 -14 0 315.27 10.5
 2 14 0 316.87 8.9
 -3 -14 0 279.37 9.9
 -3 -14 0 281.17 11.3
 -3 -14 0 271.27 10.7
 3 14 0 272.97 8.2
 -4 -14 0 804.22 21.4
 -4 -14 0 772.82 20.1
 -4 -14 0 750.92 20.9
 4 14 0 746.03 18.7
 -5 -14 0 67.29 6.8
 -5 -14 0 66.19 7.3
 -5 -14 0 85.89 8.1
 5 14 0 68.79 4.9
 -6 -14 0 75.89 7.4
 -6 -14 0 77.79 7.9
 -6 -14 0 71.59 8.3
 6 14 0 80.69 5.6
 -7 -14 0 44.3 7.8
 -7 -14 0 19.9 5.3
 -7 -14 0 33.5 5.5
 -8 -14 0 21.2 5.6
 -8 -14 0 14.3 5.4
 8 14 0 11.9 3.5
 -9 -14 0 82.39 9.1
 -9 -14 0 94.49 9.6
 -9 -14 0 106.59 10.6
 9 14 0 89.49 7.4
 -10 -14 0 149.99 11.3
 -10 -14 0 125.49 10.3
 10 14 0 131.99 8.5
 -11 -14 0 314.97 14.6
 -11 -14 0 311.07 14.8
 11 14 0 326.07 12.1
 -12 -14 0 184.68 13.5
 -12 -14 0 158.88 12.4
 12 14 0 180.88 10.3
 -13 -14 0 100.99 12.7
 -13 -14 0 95.19 13
 13 14 0 80.39 9.5
 11 -15 0 92.29 11.3
 -11 15 0 60.79 9.7
 -11 15 0 63.79 8.5
 10 -15 0 53.29 10.6
 9 -15 0 17.4 6.2
 -9 15 0 11.6 4.5
 -9 15 0 8.4 4.1
 8 -15 0 0.5 5.4
 -8 15 0 -0.1 4
 -8 15 0 4.1 3.7
 7 -15 0 134.69 11
 -7 15 0 125.79 7.7
 -7 15 0 127.09 8.3
 6 -15 0 388.06 14.8
 -6 15 0 377.76 12.1
 -6 15 0 370.66 12.6
 5 -15 0 279.27 12.7
 -5 15 0 290.27 10.4
 -5 15 0 281.27 9.9
 4 -15 0 513.95 16.7
 4 -15 0 477.75 15.8
 -4 15 0 507.25 14.1
 -4 15 0 513.85 14.4
 3 -15 0 131.39 8.8
 3 -15 0 129.89 9.3
 -3 15 0 127.79 6.7
 -3 15 0 117.39 6.2
 2 -15 0 76.49 7.8
 2 -15 0 72.89 8.1
 -2 15 0 73.89 5.4
 -2 15 0 68.89 5.2
 1 -15 0 44.3 7.3
 -1 15 0 43 4.7
 -1 15 0 38.5 4.6
 0 -15 0 14.7 4.4
 0 -15 0 12.5 4.3
 0 15 0 9.3 2.4
 -1 -15 0 165.38 8.3
 -1 -15 0 171.08 9.3
 -1 -15 0 175.68 9.9
 1 15 0 171.28 6.3
 -2 -15 0 204.78 8.8
 -2 -15 0 218.68 10.4
 -2 -15 0 207.88 10.1
 2 15 0 209.78 7
 -3 -15 0 372.06 12.3
 -3 -15 0 371.16 13.2
 -3 -15 0 377.76 13.5
 3 15 0 370.96 10.3
 -4 -15 0 253.47 10.2
 -4 -15 0 271.27 11.5
 -4 -15 0 290.47 11.8
 4 15 0 257.97 8.2
 -5 -15 0 397.86 13.3
 -5 -15 0 396.76 14.1
 -5 -15 0 405.26 14.3
 5 15 0 383.36 11.1
 -6 -15 0 21.6 5.3
 -6 -15 0 22.9 5.5
 -6 -15 0 21.1 5.1
 6 15 0 27.3 4.8
 -7 -15 0 90.29 9.5
 -7 -15 0 98.49 9.6
 -7 -15 0 72.89 8.3
 7 15 0 70.19 6.3
 -8 -15 0 29.9 6.2
 -8 -15 0 19.7 5.5
 -8 -15 0 28.4 6.3
 8 15 0 42.9 6.8
 -9 -15 0 12 5.6
 -9 -15 0 12 6.3
 -9 -15 0 13.7 6.2
 9 15 0 7.7 3.9
 -10 -15 0 67.09 10.8
 -10 -15 0 54.69 7.8
 10 15 0 58.99 8.1
 -11 -15 0 116.99 11.3
 -11 -15 0 107.09 12
 11 15 0 111.39 9.2
 -12 -15 0 306.17 15.5
 -12 -15 0 285.07 14.7
 12 15 0 292.67 12.7
 10 -16 0 68.49 11.9
 -10 16 0 69.99 8.6
 -10 16 0 80.99 9.5
 9 -16 0 23.3 6.7
 -9 16 0 23.7 4.9
 -9 16 0 25.6 4.7
 8 -16 0 9.8 6.1
 -8 16 0 4.8 4.2
 -8 16 0 0 3.8
 7 -16 0 59.29 10.3
 -7 16 0 60.59 7
 -7 16 0 61.29 7.7
 6 -16 0 165.28 11.4
 -6 16 0 147.29 8.5
 -6 16 0 142.09 8
 5 -16 0 282.77 13.5
 -5 16 0 265.47 10.4
 -5 16 0 271.87 10
 4 -16 0 375.36 14
 4 -16 0 381.26 14.9
 -4 16 0 362.96 11.9
 -4 16 0 360.26 11.5
 3 -16 0 109.39 9.2
 3 -16 0 122.69 10
 -3 16 0 116.49 6.5
 -3 16 0 119.89 6.8
 2 -16 0 196.58 11.4
 2 -16 0 197.18 10.4
 -2 16 0 186.18 7.7
 -2 16 0 180.78 7.6
 1 -16 0 14.7 4.9
 1 -16 0 18.7 5.1
 -1 16 0 11.9 2.9
 -1 16 0 10.2 2.7
 0 -16 0 14.4 4.8
 0 -16 0 10.1 4.8
 0 16 0 15.7 2.9
 0 16 0 14.6 2.7
 -1 -16 0 6.4 4.3
 -1 -16 0 2.6 4.5
 -1 -16 0 5.3 4.7
 1 16 0 3.8 2.4
 -2 -16 0 123.79 9.5
 -2 -16 0 123.29 9.1
 -2 -16 0 109.49 7.7
 2 16 0 123.59 5.6
 -3 -16 0 242.58 11.5
 -3 -16 0 218.98 11.2
 -3 -16 0 222.18 9.7
 3 16 0 234.08 7.6
 -4 -16 0 239.88 11.6
 -4 -16 0 234.08 10.5
 -4 -16 0 269.67 12.4
 4 16 0 239.08 8
 -5 -16 0 128.69 10.3
 -5 -16 0 127.59 8.9
 -5 -16 0 119.29 9.9
 5 16 0 121.59 6
 -6 -16 0 190.78 10.9
 -6 -16 0 196.68 11.3
 -6 -16 0 187.08 10.3
 6 16 0 170.48 7.3
 -7 -16 0 39 6.3
 -7 -16 0 39 6.3
 -7 -16 0 35.6 6.6
 7 16 0 43.3 5.6
 -8 -16 0 12.7 6.4
 -8 -16 0 14.3 6.4
 -8 -16 0 26.5 6.1
 8 16 0 19.4 3.6
 -9 -16 0 13.7 6.7
 -9 -16 0 7.2 6.4
 -9 -16 0 1.6 5.5
 9 16 0 2.3 3.7
 -10 -16 0 25 7.5
 -10 -16 0 12.2 7.2
 10 16 0 11.3 4.5
 -11 -16 0 43 8.2
 -11 -16 0 53.19 8.4
 11 16 0 33.4 5.4
 9 -17 0 72.79 12.4
 -9 17 0 76.39 8.2
 -9 17 0 70.59 9.1
 8 -17 0 34.7 7.3
 -8 17 0 25.8 5.1
 -8 17 0 25.3 4.7
 7 -17 0 -1 6
 -7 17 0 -2.7 3.8
 -7 17 0 -4 3.8
 6 -17 0 148.69 12.3
 -6 17 0 144.89 8.8
 -6 17 0 138.39 8.3
 5 -17 0 201.78 12.6
 -5 17 0 198.48 9.1
 -5 17 0 209.98 9.5
 4 -17 0 211.28 11.6
 4 -17 0 216.58 12.6
 -4 17 0 205.98 9.1
 -4 17 0 215.48 8.9
 3 -17 0 167.58 12.1
 3 -17 0 156.28 10.5
 -3 17 0 159.88 7.9
 -3 17 0 159.98 7.6
 2 -17 0 133.79 10.6
 2 -17 0 123.99 10.1
 -2 17 0 120.39 6.9
 -2 17 0 117.59 6.7
 1 -17 0 80.39 9.7
 1 -17 0 84.99 9.3
 -1 17 0 64.09 5.8
 -1 17 0 88.09 5.8
 0 -17 0 64.19 8.9
 0 -17 0 63.59 9.3
 0 17 0 63.09 5.4
 0 17 0 64.89 5.5
 -1 -17 0 0 5
 -1 -17 0 8.1 5.2
 -1 -17 0 -2.8 4.5
 1 17 0 4.1 2.5
 -2 -17 0 15.4 5.1
 -2 -17 0 13.8 5.6
 -2 -17 0 20.9 5.6
 2 17 0 16.8 2.7
 -3 -17 0 71.09 9.2
 -3 -17 0 69.19 9.6
 -3 -17 0 63.19 7.9
 3 17 0 71.19 5.1
 -4 -17 0 326.87 14
 -4 -17 0 302.97 12.2
 -4 -17 0 312.47 13.5
 4 17 0 298.17 12.3
 -5 -17 0 368.56 15
 -5 -17 0 344.07 13.3
 -5 -17 0 355.86 14.6
 -6 -17 0 35 6.7
 -6 -17 0 39.6 6.5
 -6 -17 0 36.4 6.4
 -7 -17 0 52.59 7.2
 -7 -17 0 46.2 7.2
 -7 -17 0 48.6 7.1
 -8 -17 0 6.7 6.6
 -8 -17 0 4.2 5.7
 -8 -17 0 1.7 6.4
 -9 -17 0 11.1 7.2
 -9 -17 0 29.7 7.5
 -9 -17 0 17.4 6.3
 -10 -17 0 38.6 8.1
 -10 -17 0 39.1 8
 7 -18 0 23.4 7.3
 -7 18 0 21.1 4.6
 -7 18 0 13.3 4.6
 6 -18 0 2.1 6.5
 -6 18 0 -3.3 3.8
 -6 18 0 2.6 3.9
 5 -18 0 123.59 12.6
 -5 18 0 119.59 8.1
 -5 18 0 119.99 8.3
 4 -18 0 81.49 11.4
 4 -18 0 83.09 10.3
 -4 18 0 76.59 7.2
 -4 18 0 86.39 7.4
 3 -18 0 149.19 12.5
 3 -18 0 159.18 11.2
 -3 18 0 156.98 7.9
 -3 18 0 159.48 8.2
 2 -18 0 228.48 13.2
 2 -18 0 235.58 12.4
 -2 18 0 214.48 8.9
 -2 18 0 209.08 8.7
 1 -18 0 106.89 11
 1 -18 0 82.49 10
 -1 18 0 105.99 6.5
 -1 18 0 90.39 6.4
 0 -18 0 99.19 10.2
 0 -18 0 102.79 10.6
 0 18 0 87.69 6
 0 18 0 91.89 6.2
 -1 -18 0 25.7 6.3
 -1 -18 0 29.5 6.4
 1 18 0 20.9 4.7
 -2 -18 0 -1.3 5
 -2 -18 0 4.4 5.8
 -2 -18 0 7.2 5.7
 -3 -18 0 1.7 5.4
 -3 -18 0 11 5.8
 -3 -18 0 1.8 5.9
 -4 -18 0 83.69 8.7
 -4 -18 0 99.69 10.6
 -4 -18 0 91.09 10.7
 -5 -18 0 117.49 9.5
 -5 -18 0 126.99 11.5
 -5 -18 0 122.79 11.4
 -6 -18 0 220.48 13.4
 -6 -18 0 175.88 11.4
 -6 -18 0 199.88 12.9
 -7 -18 0 32.4 6.9
 -7 -18 0 21.7 6.9
 -7 -18 0 14.3 7
 -8 -18 0 34.9 7.8
 -8 -18 0 24.9 7.1
 -8 -18 0 32.4 7.1
 5 -19 0 29.2 7.6
 -5 19 0 25.4 4.6
 -5 19 0 21.7 4.4
 4 -19 0 67.79 12.5
 -4 19 0 75.79 7.4
 -4 19 0 63.89 7.4
 3 -19 0 28.7 7.5
 3 -19 0 28.6 6.9
 -3 19 0 33.2 4.3
 -3 19 0 30.9 4.3
 2 -19 0 59.09 11.2
 2 -19 0 70.59 11.4
 -2 19 0 53.09 6.6
 -2 19 0 60.19 6.6
 1 -19 0 265.97 14.3
 1 -19 0 259.47 13.5
 -1 19 0 223.58 11.2
 0 -19 0 105.79 11.7
 0 -19 0 122.79 11.9
 -1 -19 0 102.89 11
 -1 -19 0 84.69 11.6
 -2 -19 0 6.9 6.5
 -2 -19 0 17.4 6.6
 -3 -19 0 21.5 6.7
 -3 -19 0 22.8 6.2
 -3 -19 0 13.2 6.8
 -4 -19 0 73.79 9.6
 -4 -19 0 107.09 11.8
 -4 -19 0 104.69 11.5
 -5 -19 0 121.39 10.5
 -5 -19 0 147.19 13.1
 -5 -19 0 131.79 12.3
 -6 -19 0 114.49 12.1
 -6 -19 0 122.89 12.5
 -6 -19 0 99.19 10.7
 2 -20 0 22.8 7.6
 2 -20 0 31.8 7.5
 1 -20 0 127.19 13.6
 1 -20 0 130.99 12.3
 0 -20 0 311.07 16.7
 0 -20 0 319.67 15.4
 -1 -20 0 117.49 12.8
 -1 -20 0 114.09 12.1
 -2 -20 0 85.09 12.8
 -2 -20 0 69.69 12.2
 -3 -20 0 9.7 7.1
 -3 -20 0 0.5 5.9
 -3 -20 0 1.3 6.8
 -2 -20 1 45.3 8.2
 -2 -20 1 37.2 8
 -1 -20 1 25.6 7.6
 -1 -20 1 14.7 7.2
 0 -20 1 2.8 7.2
 0 -20 1 6.1 7
 1 -20 1 -0.5 7
 -6 -19 1 111.39 12.5
 -6 -19 1 109.99 12.1
 -6 -19 1 59.69 10.2
 -5 -19 1 19.2 6.9
 -5 -19 1 14.4 6.3
 -5 -19 1 10 7.2
 -4 -19 1 260.17 12.5
 -4 -19 1 287.67 15
 -4 -19 1 285.17 15
 -3 -19 1 189.28 11.2
 -3 -19 1 192.88 13.2
 -3 -19 1 197.98 13.2
 -2 -19 1 103.79 12.3
 -2 -19 1 83.29 11.1
 -1 -19 1 76.29 12
 -1 -19 1 51.99 7.7
 0 -19 1 61.59 11.3
 0 -19 1 34.8 7.3
 -1 19 -1 25.7 3.8
 -1 19 -1 22.7 4
 1 -19 1 22.2 7
 1 -19 1 22 6.9
 -2 19 -1 3.7 3.5
 -2 19 -1 -2.1 3.2
 2 -19 1 2.1 6.4
 2 -19 1 -0.6 6.5
 -3 19 -1 55.09 6.8
 -3 19 -1 51.99 7.2
 3 -19 1 36.2 7.8
 3 -19 1 44.1 7.4
 -4 19 -1 122.39 8.4
 -4 19 -1 122.09 8.5
 4 -19 1 145.29 12.6
 4 -19 1 119.19 13
 -5 19 -1 141.59 9
 -5 19 -1 129.19 9
 5 -19 1 160.28 14.2
 -8 -18 1 38.4 8.1
 -8 -18 1 35.1 7.3
 -8 -18 1 31.9 7.3
 -7 -18 1 62.89 10.1
 -7 -18 1 68.09 11.8
 -7 -18 1 67.59 11.7
 -6 -18 1 2.7 6.1
 -6 -18 1 4.3 6
 -6 -18 1 -1.9 6.5
 -5 -18 1 23 6.9
 -5 -18 1 28.7 6.6
 -5 -18 1 28.9 6.3
 -4 -18 1 78.59 10.8
 -4 -18 1 81.09 10.8
 -4 -18 1 74.49 9
 -3 -18 1 139.89 12
 -3 -18 1 136.69 9.6
 -3 -18 1 139.09 11.2
 2 18 -1 184.28 9.1
 -2 -18 1 173.98 10.1
 -2 -18 1 171.28 11.9
 -2 -18 1 182.18 12.2
 1 18 -1 158.48 7.4
 -1 -18 1 173.68 12.7
 -1 -18 1 161.98 11.4
 0 18 -1 162.38 7.5
 0 18 -1 149.59 7.4
 0 -18 1 162.38 12.4
 0 -18 1 169.58 11.4
 -1 18 -1 92.59 6.6
 -1 18 -1 89.29 6.6
 1 -18 1 94.39 10.9
 1 -18 1 99.79 10.4
 -2 18 -1 18.1 3.7
 -2 18 -1 19.1 3.6
 2 -18 1 26.6 6.5
 2 -18 1 17.1 6.5
 -3 18 -1 56.69 6.5
 -3 18 -1 62.29 6.8
 3 -18 1 57.79 9.9
 3 -18 1 49.1 7.5
 -4 18 -1 108.89 8.1
 -4 18 -1 109.79 7.7
 4 -18 1 127.39 11.6
 4 -18 1 98.69 11.7
 -5 18 -1 97.89 7.9
 -5 18 -1 87.49 8.1
 5 -18 1 100.39 12.1
 -6 18 -1 128.89 8.7
 -6 18 -1 120.09 8.8
 6 -18 1 132.39 12.8
 -7 18 -1 92.99 9
 -7 18 -1 96.99 8.5
 7 -18 1 101.99 12.5
 -9 -17 1 150.68 12.2
 -9 -17 1 145.49 13.1
 -9 -17 1 143.19 12.7
 -8 -17 1 121.19 11.1
 -8 -17 1 141.29 12.2
 -8 -17 1 122.19 12.1
 -7 -17 1 20 6.9
 -7 -17 1 20 6.5
 -7 -17 1 14.8 6.1
 6 17 -1 24.5 4.3
 -6 -17 1 27.6 6.3
 -6 -17 1 27.4 6.7
 -6 -17 1 24.2 6.2
 5 17 -1 5.4 2.9
 -5 -17 1 4.5 5.5
 -5 -17 1 5.7 5.5
 -5 -17 1 9.3 6.1
 4 17 -1 36.7 5
 -4 -17 1 33.9 6.3
 -4 -17 1 31.9 5.7
 -4 -17 1 40.7 6.5
 3 17 -1 88.59 5.6
 -3 -17 1 89.89 10.4
 -3 -17 1 85.29 10
 -3 -17 1 72.29 8.1
 2 17 -1 212.18 7.8
 -2 -17 1 209.18 12
 -2 -17 1 195.28 9.9
 -2 -17 1 209.38 11.5
 1 17 -1 149.09 6.9
 -1 -17 1 156.58 11.5
 -1 -17 1 157.28 8.8
 -1 -17 1 154.78 10.5
 0 17 -1 470.15 13.3
 0 17 -1 465.45 13.3
 0 -17 1 457.55 16.2
 0 -17 1 477.95 17.1
 -1 17 -1 113.09 6.6
 -1 17 -1 98.29 6.4
 1 -17 1 110.49 9.8
 1 -17 1 111.39 10.5
 -2 17 -1 169.48 7.8
 -2 17 -1 166.08 7.9
 2 -17 1 175.08 10.9
 2 -17 1 180.58 11.7
 -3 17 -1 -5 3
 -3 17 -1 -1.6 3.1
 3 -17 1 3.9 5.4
 3 -17 1 4.3 5.5
 -4 17 -1 100.19 7.1
 -4 17 -1 90.69 7.5
 4 -17 1 96.09 10.9
 4 -17 1 100.79 10.1
 -5 17 -1 124.99 8
 -5 17 -1 122.89 8.2
 5 -17 1 138.39 12.5
 -6 17 -1 185.78 9.5
 -6 17 -1 191.38 9.8
 6 -17 1 207.38 13.1
 -7 17 -1 179.38 10
 -7 17 -1 171.68 9.3
 7 -17 1 176.68 12.8
 -8 17 -1 168.28 10.4
 -8 17 -1 156.18 9.5
 8 -17 1 165.68 13.6
 10 16 -1 92.89 9.3
 -10 -16 1 89.59 11
 -10 -16 1 75.19 11.9
 9 16 -1 161.48 9.4
 -9 -16 1 173.98 12.6
 -9 -16 1 160.08 11.9
 -9 -16 1 178.48 12.8
 8 16 -1 226.88 9.7
 -8 -16 1 221.08 13
 -8 -16 1 222.38 13.1
 -8 -16 1 223.08 12.1
 7 16 -1 243.88 9.4
 -7 -16 1 279.07 13.4
 -7 -16 1 267.77 13.5
 -7 -16 1 249.78 12.1
 6 16 -1 8.6 3.1
 -6 -16 1 18.2 6
 -6 -16 1 12 5.4
 -6 -16 1 13 5.3
 5 16 -1 7.5 2.8
 -5 -16 1 7 5.1
 -5 -16 1 15.8 5.7
 -5 -16 1 15.1 5.2
 4 16 -1 4.3 2.6
 -4 -16 1 10.1 5
 -4 -16 1 5.9 5.1
 -4 -16 1 9.3 5
 3 16 -1 97.39 5.6
 -3 -16 1 108.99 9.5
 -3 -16 1 92.99 7.8
 -3 -16 1 99.19 9.3
 2 16 -1 66.29 5.1
 -2 -16 1 57.09 7.2
 -2 -16 1 64.79 8.9
 -2 -16 1 64.89 8.5
 1 16 -1 205.28 7.5
 -1 -16 1 181.38 9
 -1 -16 1 219.18 11.5
 -1 -16 1 203.68 10.8
 0 16 -1 325.97 10.2
 0 -16 1 325.87 13.5
 0 -16 1 331.17 12.9
 -1 16 -1 600.94 16
 -1 16 -1 605.14 15.9
 1 -16 1 598.94 19.1
 1 -16 1 589.94 18.3
 -2 16 -1 123.59 6.6
 -2 16 -1 127.89 6.8
 2 -16 1 125.49 10
 2 -16 1 136.59 10
 -3 16 -1 62.19 6.2
 -3 16 -1 62.49 5.9
 3 -16 1 66.19 8.6
 3 -16 1 78.49 9.6
 -4 16 -1 20.7 3.7
 -4 16 -1 22.4 3.7
 4 -16 1 26.6 5.5
 4 -16 1 25.7 5.9
 -5 16 -1 123.69 8
 -5 16 -1 108.99 7.2
 5 -16 1 121.69 10.7
 -6 16 -1 115.99 8.2
 -6 16 -1 107.59 7.6
 6 -16 1 112.49 10.9
 -7 16 -1 163.88 9.5
 -7 16 -1 169.18 8.9
 7 -16 1 176.58 12
 -8 16 -1 228.28 10.4
 -8 16 -1 232.18 11.1
 8 -16 1 248.18 14.2
 -9 16 -1 108.09 8.5
 -9 16 -1 92.99 9.5
 9 -16 1 108.59 12.5
 -10 16 -1 185.98 11.3
 -10 16 -1 173.08 10
 10 -16 1 174.58 13.6
 11 15 -1 9 4.8
 -11 -15 1 4.5 7
 -11 -15 1 4.2 7
 10 15 -1 120.89 9.4
 -10 -15 1 132.39 11.6
 -10 -15 1 128.39 12
 9 15 -1 215.78 10.4
 -9 -15 1 216.78 11.6
 -9 -15 1 199.08 12.8
 -9 -15 1 200.78 11.9
 8 15 -1 336.77 11.7
 -8 -15 1 305.97 13
 -8 -15 1 330.47 14.5
 -8 -15 1 356.76 14.4
 7 15 -1 178.98 8.2
 -7 -15 1 183.58 10
 -7 -15 1 172.98 11.2
 -7 -15 1 184.98 11.3
 6 15 -1 221.38 8.4
 -6 -15 1 236.28 11.7
 -6 -15 1 222.28 10.5
 -6 -15 1 213.68 11.9
 5 15 -1 19.5 3
 -5 -15 1 23.3 5
 -5 -15 1 26.7 5.4
 -5 -15 1 26.6 5.2
 4 15 -1 12.9 2.6
 -4 -15 1 8.5 4.5
 -4 -15 1 18.9 4.8
 -4 -15 1 10.2 4.8
 3 15 -1 30 4.4
 -3 -15 1 14.1 4.7
 -3 -15 1 19.5 4.7
 -3 -15 1 20.7 4.5
 2 15 -1 131.09 5.9
 -2 -15 1 126.39 9
 -2 -15 1 130.09 8.9
 -2 -15 1 119.39 7.6
 1 15 -1 149.79 6.2
 -1 -15 1 146.69 9.3
 -1 -15 1 135.89 8.8
 -1 -15 1 129.29 7.7
 0 15 -1 526.45 14.1
 0 -15 1 537.25 17.2
 0 -15 1 529.15 16.3
 -1 15 -1 252.57 8.6
 1 -15 1 261.07 11
 1 -15 1 254.07 11.5
 -2 15 -1 305.97 9.8
 -2 15 -1 310.37 10
 2 -15 1 319.97 12.1
 2 -15 1 311.67 12.7
 -3 15 -1 131.89 6.7
 -3 15 -1 131.29 6.9
 3 -15 1 138.79 9.7
 3 -15 1 137.09 9.1
 -4 15 -1 -0.1 2.8
 -4 15 -1 -3.2 2.8
 4 -15 1 -1.9 4.3
 4 -15 1 4.6 4.7
 -5 15 -1 15.2 3.5
 -5 15 -1 24.2 3.8
 5 -15 1 18.5 5.5
 -6 15 -1 164.88 8.1
 -6 15 -1 170.98 8.7
 6 -15 1 162.68 11
 -7 15 -1 127.19 8.4
 -7 15 -1 116.49 7.9
 7 -15 1 138.29 10.9
 -8 15 -1 75.89 8.1
 -8 15 -1 72.99 7.4
 8 -15 1 75.29 10.5
 -9 15 -1 282.57 11.3
 -9 15 -1 284.27 12.5
 9 -15 1 304.97 14.5
 -10 15 -1 213.68 10.3
 -10 15 -1 205.48 11.5
 10 -15 1 209.98 13.9
 -11 15 -1 143.59 10.9
 -11 15 -1 143.09 9.8
 11 -15 1 163.68 13.3
 12 14 -1 3.5 4.7
 -12 -14 1 17.4 7.7
 -12 -14 1 13.3 7.4
 11 14 -1 10.9 4.5
 -11 -14 1 9.8 6.8
 -11 -14 1 20.1 7.2
 10 14 -1 31.8 4.6
 -10 -14 1 46 7.2
 -10 -14 1 41.6 7.1
 9 14 -1 52.69 7.5
 -9 -14 1 74.19 10.1
 -9 -14 1 63.59 9.4
 -9 -14 1 55.89 9.2
 8 14 -1 396.56 12.8
 -8 -14 1 377.76 14.8
 -8 -14 1 366.36 14
 -8 -14 1 404.46 14.8
 7 14 -1 617.04 16.8
 -7 -14 1 602.64 17.8
 -7 -14 1 589.44 18.8
 -7 -14 1 619.34 18.8
 6 14 -1 290.27 9.9
 -6 -14 1 297.67 12.4
 -6 -14 1 319.27 12.2
 -6 -14 1 306.67 11.3
 5 14 -1 187.38 7.4
 -5 -14 1 223.88 9.4
 -5 -14 1 210.88 10.1
 -5 -14 1 193.98 10.2
 4 14 -1 38.1 4.5
 -4 -14 1 55.89 6.6
 -4 -14 1 53.29 7.6
 -4 -14 1 55.19 7.4
 3 14 -1 29.4 4.2
 -3 -14 1 47.7 7.1
 -3 -14 1 35.3 6.9
 -3 -14 1 38.8 6.1
 2 14 -1 87.79 5
 -2 -14 1 93.19 7.6
 -2 -14 1 99.79 6.7
 -2 -14 1 110.09 7.9
 1 14 -1 258.37 8.2
 -1 -14 1 261.07 9.4
 -1 -14 1 258.17 10.5
 -1 -14 1 269.37 10.9
 0 14 -1 656.83 16.4
 0 -14 1 642.64 17.2
 0 -14 1 635.04 18.3
 0 -14 1 661.83 18.9
 -1 14 -1 500.15 13.4
 1 -14 1 510.15 15.8
 1 -14 1 492.55 15.2
 -2 14 -1 99.89 5.6
 -2 14 -1 111.69 5.9
 2 -14 1 116.79 8.5
 2 -14 1 116.39 7.9
 -3 14 -1 164.98 6.9
 -3 14 -1 171.58 7.3
 3 -14 1 169.48 9
 3 -14 1 165.98 9.5
 -4 14 -1 91.39 6.3
 -4 14 -1 87.49 5.8
 4 -14 1 87.29 8.5
 4 -14 1 109.39 7.9
 -5 14 -1 -0.2 2.8
 -5 14 -1 0.1 3
 5 -14 1 3.8 4.5
 -6 14 -1 55.09 6
 -6 14 -1 56.09 6.6
 6 -14 1 65.69 8.8
 -7 14 -1 161.18 8.7
 -7 14 -1 163.58 8.1
 7 -14 1 163.28 10.6
 -8 14 -1 88.89 8.1
 -8 14 -1 99.29 7.4
 8 -14 1 112.79 10.4
 -9 14 -1 189.38 9.2
 -9 14 -1 186.58 10.2
 9 -14 1 201.58 12.4
 -10 14 -1 198.48 11.1
 -10 14 -1 202.08 9.9
 10 -14 1 224.68 13.3
 -11 14 -1 205.38 10.4
 -11 14 -1 208.28 11.7
 11 -14 1 219.18 13.7
 -12 14 -1 35.5 6.2
 -12 14 -1 37 5.7
 12 -14 1 32.3 7
 13 13 -1 84.29 9.4
 -13 -13 1 114.99 12.5
 -13 -13 1 91.49 12.1
 12 13 -1 53.89 8.6
 -12 -13 1 49.2 8.1
 -12 -13 1 57.39 11.2
 11 13 -1 22.5 4.5
 -11 -13 1 33 6.9
 -11 -13 1 34.8 7.2
 10 13 -1 4.8 3.7
 -10 -13 1 8.3 5.8
 -10 -13 1 12.6 6.1
 9 13 -1 215.68 9.3
 -9 -13 1 222.18 10.9
 -9 -13 1 195.98 10.9
 -9 -13 1 223.08 12.3
 8 13 -1 310.77 10.7
 -8 -13 1 291.97 12.8
 -8 -13 1 306.97 12.4
 -8 -13 1 326.07 12.4
 7 13 -1 231.78 8.9
 -7 -13 1 230.48 10.9
 -7 -13 1 200.98 9.7
 -7 -13 1 225.38 10.6
 6 13 -1 589.84 16
 -6 -13 1 585.54 17.7
 -6 -13 1 606.34 17.7
 -6 -13 1 586.74 16.7
 5 13 -1 11.9 2.6
 -5 -13 1 18.3 4.1
 -5 -13 1 11.1 4.4
 -5 -13 1 15.2 4.1
 4 13 -1 89.99 5.1
 -4 -13 1 103.89 7.7
 -4 -13 1 110.59 7.6
 -4 -13 1 104.59 6.6
 3 13 -1 12.8 2.3
 -3 -13 1 19.6 3.8
 -3 -13 1 15.2 3.8
 -3 -13 1 12.1 3.9
 2 13 -1 2.1 2
 -2 -13 1 4.5 3.6
 -2 -13 1 2.1 3.3
 -2 -13 1 5.6 3.4
 1 13 -1 106.89 5.1
 -1 -13 1 128.89 7.6
 -1 -13 1 109.39 7
 -1 -13 1 114.19 6.4
 0 13 -1 455.05 12.2
 0 -13 1 469.25 14.4
 0 -13 1 462.25 13.9
 0 -13 1 451.85 12.9
 -1 13 -1 365.96 10.3
 1 -13 1 357.16 11.9
 1 -13 1 363.06 12.5
 -2 13 -1 321.37 9.6
 -2 13 -1 312.47 9.7
 2 -13 1 335.87 11.8
 2 -13 1 330.17 11.3
 -3 13 -1 336.97 10.1
 -3 13 -1 336.47 10.4
 3 -13 1 348.67 11.8
 3 -13 1 362.76 12.6
 -4 13 -1 92.89 6.1
 -4 13 -1 104.89 5.7
 4 -13 1 105.99 8
 4 -13 1 102.49 7.3
 -5 13 -1 152.78 6.8
 -5 13 -1 152.08 7.5
 5 -13 1 146.29 8.3
 5 -13 1 158.18 9.3
 -6 13 -1 21.3 3.6
 -6 13 -1 22.3 3.4
 6 -13 1 18.8 4.8
 -7 13 -1 88.89 6.5
 -7 13 -1 88.79 7.3
 7 -13 1 88.09 8.8
 -8 13 -1 79.89 6.9
 -8 13 -1 82.49 7.6
 8 -13 1 91.09 9.3
 -9 13 -1 295.27 11.8
 -9 13 -1 281.97 10.8
 9 -13 1 296.97 13.6
 -10 13 -1 231.28 11.3
 -10 13 -1 234.58 10.1
 10 -13 1 226.58 12.3
 -11 13 -1 327.57 13.9
 -11 13 -1 363.06 12.8
 11 -13 1 360.56 15.1
 -12 13 -1 71.39 9.9
 -12 13 -1 72.09 8.6
 12 -13 1 93.69 11.4
 14 12 -1 146.89 10.7
 -14 -12 1 158.78 12.7
 -14 -12 1 162.88 13.9
 13 12 -1 134.39 9.9
 -13 -12 1 127.19 12.1
 -13 -12 1 117.29 12.6
 12 12 -1 186.08 10.2
 -12 -12 1 209.48 13.2
 -12 -12 1 188.28 11.9
 11 12 -1 11.4 4
 -11 -12 1 7.1 6
 -11 -12 1 11.3 6.1
 10 12 -1 8.8 3.5
 -10 -12 1 4.9 5.4
 -10 -12 1 -0.3 5.4
 9 12 -1 37.8 6.1
 -9 -12 1 48 8.6
 -9 -12 1 45.7 7.8
 8 12 -1 96.19 6.6
 -8 -12 1 103.39 8.8
 -8 -12 1 112.79 8.4
 -8 -12 1 111.99 8.2
 7 12 -1 335.27 10.6
 -7 -12 1 330.67 12.6
 -7 -12 1 347.77 12.1
 -7 -12 1 355.46 11.9
 6 12 -1 725.23 18.5
 -6 -12 1 723.83 19.2
 -6 -12 1 713.33 20
 -6 -12 1 733.33 19.9
 5 12 -1 508.95 13.8
 -5 -12 1 520.45 15.2
 -5 -12 1 518.25 14.5
 -5 -12 1 515.55 15.2
 4 12 -1 245.38 8
 -4 -12 1 259.97 10
 -4 -12 1 264.67 9.8
 -4 -12 1 245.18 9
 3 12 -1 5.5 2
 -3 -12 1 10 3.3
 2 12 -1 11.2 2
 -2 -12 1 14.1 3.5
 -2 -12 1 14.3 3.3
 -2 -12 1 8.9 3.2
 1 12 -1 -1.6 1.7
 -1 -12 1 -2 3
 -1 -12 1 3.2 3.1
 -1 -12 1 2.2 2.9
 0 12 -1 526.55 13.3
 0 -12 1 508.95 13.9
 0 -12 1 506.95 14.7
 0 -12 1 546.85 15.3
 -1 12 -1 361.06 10.1
 1 -12 1 359.06 11.5
 1 -12 1 377.66 12.1
 -2 12 -1 249.08 8
 2 -12 1 254.07 9.4
 2 -12 1 262.57 10
 -3 12 -1 271.07 8.4
 -3 12 -1 275.87 8.7
 3 -12 1 274.87 9.8
 3 -12 1 275.27 10.5
 -4 12 -1 439.06 12.4
 -4 12 -1 435.96 12
 4 -12 1 438.96 13.3
 4 -12 1 435.56 14
 -5 12 -1 155.88 6.6
 -5 12 -1 148.29 7.2
 5 -12 1 163.58 8.8
 -6 12 -1 39.9 5.9
 -6 12 -1 38.1 5.1
 6 -12 1 59.19 7.8
 -7 12 -1 18.8 3.4
 -7 12 -1 21.6 3.8
 7 -12 1 21.5 4.7
 -8 12 -1 165.78 8.6
 -8 12 -1 150.78 7.6
 8 -12 1 150.18 9.7
 8 -12 1 153.38 8.2
 -9 12 -1 60.29 6.5
 -9 12 -1 68.49 7.5
 9 -12 1 57.19 7.2
 9 -12 1 64.89 9
 -10 12 -1 169.88 8.7
 -10 12 -1 177.48 9.9
 10 -12 1 154.58 10.7
 -11 12 -1 450.85 14.3
 -11 12 -1 428.96 15.5
 11 -12 1 440.36 16.5
 -12 12 -1 212.28 10.4
 -12 12 -1 218.08 11.9
 12 -12 1 212.98 12.8
 -13 12 -1 29.8 6.1
 -13 12 -1 30.5 5.4
 13 -12 1 32.4 6.8
 14 11 -1 62.09 9.3
 -14 -11 1 53.29 8.3
 -14 -11 1 79.39 11.3
 13 11 -1 76.09 8.9
 -13 -11 1 81.49 10.6
 -13 -11 1 76.79 10.8
 12 11 -1 247.78 10.9
 -12 -11 1 260.97 13.1
 -12 -11 1 264.67 12.5
 11 11 -1 43 6.9
 -11 -11 1 46.2 6.4
 -11 -11 1 38.2 6.2
 10 11 -1 126.69 7.4
 -10 -11 1 118.39 9.6
 -10 -11 1 107.69 8.9
 9 11 -1 23.7 3.6
 -9 -11 1 28.5 5.3
 -9 -11 1 29 5.3
 8 11 -1 58.19 5.6
 -8 -11 1 64.89 7.7
 -8 -11 1 61.69 7
 -8 -11 1 65.79 7
 7 11 -1 274.37 9.1
 -7 -11 1 294.77 11
 -7 -11 1 285.87 10.2
 -7 -11 1 281.07 10.6
 6 11 -1 243.48 8.1
 -6 -11 1 238.08 9.2
 -6 -11 1 242.38 9.4
 -6 -11 1 251.67 10
 5 11 -1 237.78 7.9
 -5 -11 1 240.98 9.2
 -5 -11 1 226.18 8.5
 -5 -11 1 234.88 9.4
 4 11 -1 362.96 10.4
 -4 -11 1 365.06 11.8
 -4 -11 1 387.76 11.7
 -4 -11 1 371.96 11
 3 11 -1 97.39 4.9
 -3 -11 1 135.79 6.8
 -3 -11 1 135.29 6.1
 -3 -11 1 128.69 6.8
 2 11 -1 249.58 7.6
 -2 -11 1 264.77 8.4
 -2 -11 1 261.87 9.2
 -2 -11 1 282.27 9.4
 1 11 -1 9.1 1.8
 -1 -11 1 11.6 2.9
 -1 -11 1 8 3
 -1 -11 1 8.2 2.8
 0 11 -1 49.5 3.6
 0 -11 1 50.89 4.3
 0 -11 1 50.99 5.3
 0 -11 1 51.39 5.4
 0 -11 1 38.7 3.8
 -1 11 -1 868.61 20.5
 1 -11 1 873.21 20.1
 1 -11 1 871.91 22
 1 -11 1 840.52 20.8
 1 -11 1 844.62 21.6
 -2 11 -1 649.34 16.2
 2 -11 1 641.04 17.2
 2 -11 1 662.23 17.7
 2 -11 1 650.63 15.8
 -3 11 -1 190.78 6.5
 -3 11 -1 190.48 6.8
 3 -11 1 186.48 7.7
 3 -11 1 191.08 8.4
 3 -11 1 193.38 6.5
 -4 11 -1 157.98 6.1
 -4 11 -1 151.18 6.5
 4 -11 1 162.28 7.3
 4 -11 1 152.48 6.1
 4 -11 1 160.28 7.8
 -5 11 -1 25.8 3.2
 -5 11 -1 26.7 4.2
 5 -11 1 22.6 2.9
 5 -11 1 33.3 6.1
 -6 11 -1 119.49 6.8
 -6 11 -1 119.99 6
 6 -11 1 123.69 6.2
 6 -11 1 115.29 6.9
 6 -11 1 116.79 7.8
 -7 11 -1 6.3 2.9
 -7 11 -1 9 3.2
 7 -11 1 6.6 3.3
 7 -11 1 1.1 3.9
 7 -11 1 1.6 2.9
 -8 11 -1 -4.5 3
 -8 11 -1 -3.3 2.9
 8 -11 1 -3.5 3
 8 -11 1 1.2 4
 8 -11 1 -4.3 3.1
 -9 11 -1 0 3.1
 -9 11 -1 -1.3 3.5
 9 -11 1 2.2 4.3
 9 -11 1 -2.2 3.2
 9 -11 1 -4.1 3.2
 -10 11 -1 373.06 12.1
 -10 11 -1 367.36 13.4
 10 -11 1 392.66 14.5
 10 -11 1 371.96 12.8
 -11 11 -1 319.97 11.6
 -11 11 -1 338.37 13
 11 -11 1 320.27 13.8
 11 -11 1 302.97 12.8
 -12 11 -1 411.36 15.2
 -12 11 -1 409.56 13.8
 12 -11 1 394.66 15.5
 -13 11 -1 92.09 8.6
 -13 11 -1 94.49 10.4
 13 -11 1 110.39 10.9
 -14 11 -1 23.4 5.3
 -14 11 -1 11.7 5.8
 14 -11 1 16.2 6.4
 15 10 -1 13.9 5.5
 -15 -10 1 18.7 7.3
 -15 -10 1 13.5 7.8
 14 10 -1 24.5 5.3
 -14 -10 1 25.9 7.2
 -14 -10 1 28.2 7.5
 13 10 -1 232.48 11
 -13 -10 1 217.28 12.5
 -13 -10 1 249.68 13.4
 12 10 -1 168.08 9.3
 -12 -10 1 176.18 11.4
 -12 -10 1 177.78 11.2
 11 10 -1 200.78 9.2
 -11 -10 1 211.08 11.2
 -11 -10 1 190.88 11
 10 10 -1 117.79 7.1
 -10 -10 1 108.89 9
 -10 -10 1 105.59 8.5
 9 10 -1 36.3 5.5
 -9 -10 1 42.8 7.2
 -9 -10 1 42.2 5.3
 8 10 -1 8 2.6
 -8 -10 1 6.3 3.9
 -8 -10 1 8.4 3.4
 -8 -10 1 7.3 4
 7 10 -1 236.88 8.1
 -7 -10 1 241.18 9.5
 -7 -10 1 258.37 9.3
 -7 -10 1 252.97 9.9
 6 10 -1 450.45 12.2
 -6 -10 1 459.85 13.4
 -6 -10 1 464.45 13.1
 -6 -10 1 454.65 13.7
 5 10 -1 501.95 12.9
 -5 -10 1 494.75 14.3
 -5 -10 1 500.25 14
 -5 -10 1 498.75 13.6
 4 10 -1 498.25 12.8
 -4 -10 1 491.95 13.7
 -4 -10 1 477.05 13.8
 -4 -10 1 486.05 13.2
 -4 -10 1 489.65 12.4
 3 10 -1 282.87 8.4
 -3 -10 1 311.77 9
 -3 -10 1 297.47 9.6
 -3 -10 1 309.77 9.7
 2 10 -1 110.89 4.6
 2 10 -1 122.49 4.9
 -2 -10 1 129.79 6.1
 -2 -10 1 124.39 4.1
 -2 -10 1 123.99 5.4
 -2 -10 1 123.99 6
 1 10 -1 85.19 3.9
 1 10 -1 88.29 4.1
 -1 -10 1 96.19 3.5
 -1 -10 1 88.09 5.4
 -1 -10 1 77.99 4.5
 -1 -10 1 79.29 5.2
 0 10 -1 21.7 2.9
 0 10 -1 19.8 2.9
 0 -10 1 24.9 3.5
 0 -10 1 26.9 4.3
 0 -10 1 21 2.7
 0 -10 1 23.2 4.5
 -1 10 -1 115.29 4.6
 -1 10 -1 118.09 4.7
 1 -10 1 111.59 4.3
 1 -10 1 109.79 4.9
 1 -10 1 110.09 5.7
 1 -10 1 114.99 6.1
 1 -10 1 116.09 5
 -2 10 -1 596.44 14.9
 -2 10 -1 590.24 14.7
 2 -10 1 598.54 14.4
 2 -10 1 601.04 16.1
 2 -10 1 583.54 15.5
 2 -10 1 581.74 14.9
 -3 10 -1 143.99 5.7
 -3 10 -1 138.79 5.3
 -3 10 -1 133.49 5.5
 3 -10 1 131.59 6.9
 3 -10 1 137.69 6.3
 3 -10 1 137.49 5.5
 3 -10 1 141.39 5.3
 -4 10 -1 496.75 13.4
 -4 10 -1 493.45 13.2
 -4 10 -1 503.85 12.8
 4 -10 1 503.05 14.3
 4 -10 1 492.25 13.6
 4 -10 1 497.95 12.8
 4 -10 1 478.05 12
 -5 10 -1 313.97 9.1
 -5 10 -1 314.27 9.8
 -5 10 -1 319.67 9.9
 5 -10 1 332.97 11
 5 -10 1 312.57 8.1
 5 -10 1 306.77 9.3
 5 -10 1 299.57 10
 -6 10 -1 295.07 9.9
 -6 10 -1 303.37 9.8
 -6 10 -1 295.87 9.1
 6 -10 1 296.87 10.8
 6 -10 1 289.57 9.3
 6 -10 1 291.27 9.8
 -7 10 -1 214.18 8.5
 -7 10 -1 207.18 7.7
 7 -10 1 214.98 8
 7 -10 1 210.48 9.4
 7 -10 1 202.08 8.3
 -8 10 -1 0.2 2.8
 -8 10 -1 -0.5 3
 8 -10 1 -0.3 3
 8 -10 1 4.1 3
 8 -10 1 -7.6 3.6
 -9 10 -1 10.7 3.7
 -9 10 -1 11.2 3.3
 9 -10 1 13.2 3.3
 9 -10 1 15.3 4.4
 9 -10 1 14.5 3.6
 -10 10 -1 158.98 9
 -10 10 -1 159.98 7.8
 10 -10 1 156.68 8.6
 10 -10 1 155.48 9.5
 10 -10 1 164.08 8.5
 -11 10 -1 201.18 9
 -11 10 -1 215.28 10.5
 11 -10 1 189.68 9.8
 11 -10 1 202.28 10.8
 -12 10 -1 206.38 9.8
 -12 10 -1 200.08 11.2
 12 -10 1 217.08 11.7
 12 -10 1 206.88 10.6
 -13 10 -1 135.49 8.7
 -13 10 -1 122.69 10.6
 13 -10 1 129.59 10.7
 13 -10 1 127.29 9.8
 13 -10 1 137.09 10
 -14 10 -1 89.49 8.9
 -14 10 -1 83.89 10.8
 14 -10 1 78.19 9.6
 14 -10 1 79.19 10.4
 14 -10 1 87.79 10.2
 15 9 -1 -2.4 4.9
 -15 -9 1 4 6.5
 -15 -9 1 9.4 7.1
 14 9 -1 7.3 4.7
 -14 -9 1 11.2 6.6
 -14 -9 1 6.6 6
 13 9 -1 55.29 8.1
 -13 -9 1 50.19 7
 -13 -9 1 64.79 9.7
 -13 -9 1 50.89 6.9
 12 9 -1 258.87 10.7
 -12 -9 1 253.97 9.7
 -12 -9 1 259.07 12.2
 -12 -9 1 257.07 11.8
 11 9 -1 401.16 12.8
 -11 -9 1 397.46 14.3
 -11 -9 1 401.06 13.9
 -11 -9 1 393.76 12
 10 9 -1 266.67 9.7
 -10 -9 1 271.27 11.3
 -10 -9 1 262.27 10.7
 9 9 -1 39.7 5.2
 -9 -9 1 37.7 6.9
 -9 -9 1 49.2 6.6
 8 9 -1 1.4 2.5
 -8 -9 1 1.7 3.7
 -8 -9 1 -1.7 3.7
 7 9 -1 29.6 4.3
 -7 -9 1 40.5 6
 -7 -9 1 32.3 5.3
 -7 -9 1 32.7 5.2
 -7 -9 1 29.2 4.5
 6 9 -1 82.09 4.6
 -6 -9 1 72.99 4.5
 -6 -9 1 89.29 6.2
 -6 -9 1 83.99 5.6
 -6 -9 1 80.59 5.8
 5 9 -1 448.66 11.4
 -5 -9 1 432.76 12
 -5 -9 1 447.86 12.5
 -5 -9 1 451.75 12.8
 -5 -9 1 409.76 11.1
 4 9 -1 200.18 6.3
 -4 -9 1 206.28 7.1
 -4 -9 1 195.38 7.6
 -4 -9 1 199.58 7.3
 -4 -9 1 196.58 5.8
 3 9 -1 550.44 13.8
 3 9 -1 565.84 14.2
 -3 -9 1 552.84 14.7
 -3 -9 1 553.34 14.7
 -3 -9 1 560.24 14.1
 -3 -9 1 541.95 13.1
 2 9 -1 246.48 7.3
 2 9 -1 257.27 7.6
 -2 -9 1 278.07 7.9
 -2 -9 1 275.77 6.9
 -2 -9 1 275.17 8.6
 -2 -9 1 271.07 8.5
 1 9 -1 93.59 3.9
 1 9 -1 96.39 4.1
 -1 -9 1 96.49 5.1
 -1 -9 1 98.79 5.1
 -1 -9 1 97.69 3.5
 -1 -9 1 98.29 4.4
 0 9 -1 95.69 4
 0 9 -1 90.49 3.9
 0 -9 1 100.79 4.4
 0 -9 1 92.39 3.7
 0 -9 1 90.19 5
 0 -9 1 94.99 5
 -1 9 -1 4.6 1.7
 -1 9 -1 4.2 1.5
 1 -9 1 2.4 1.5
 1 -9 1 3.7 1.9
 1 -9 1 4.5 2.3
 1 -9 1 4.4 2.3
 1 -9 1 6.3 2
 -2 9 -1 538.05 13.4
 -2 9 -1 535.25 13.2
 2 -9 1 525.45 14.3
 2 -9 1 529.75 13.3
 2 -9 1 539.45 13
 2 -9 1 506.45 13.8
 -3 9 -1 576.14 14.4
 -3 9 -1 550.94 14.1
 -3 9 -1 572.64 13.9
 3 -9 1 542.35 14.6
 3 -9 1 573.74 15.3
 3 -9 1 543.15 13.4
 3 -9 1 586.24 13.9
 3 -9 1 548.05 14.1
 -4 9 -1 189.88 6.7
 -4 9 -1 186.38 6.1
 -4 9 -1 188.18 6.6
 4 -9 1 184.48 6.3
 4 -9 1 182.28 5.3
 4 -9 1 176.38 7.5
 4 -9 1 192.08 7.1
 4 -9 1 189.38 7
 4 -9 1 186.58 6.9
 -5 9 -1 108.59 4.8
 -5 9 -1 99.69 5.3
 -5 9 -1 98.79 5.4
 5 -9 1 109.39 6.3
 5 -9 1 99.49 5.4
 5 -9 1 100.39 5
 5 -9 1 98.49 3.6
 -6 9 -1 79.49 5.4
 -6 9 -1 69.69 5.4
 -6 9 -1 82.69 4.8
 6 -9 1 85.19 5.4
 6 -9 1 89.29 6.2
 6 -9 1 81.29 5.2
 -7 9 -1 326.57 9.9
 -7 9 -1 330.77 10.6
 7 -9 1 318.77 10.1
 7 -9 1 330.37 10.2
 7 -9 1 336.07 11.3
 -8 9 -1 73.79 6.3
 -8 9 -1 75.39 5.5
 8 -9 1 77.99 6.2
 8 -9 1 82.89 5.6
 8 -9 1 74.59 7.1
 -9 9 -1 40.9 5.4
 -9 9 -1 41.2 6.3
 9 -9 1 46.7 5.9
 9 -9 1 41.2 6.7
 9 -9 1 42 5.2
 -10 9 -1 56.59 7.1
 -10 9 -1 57.09 5.8
 10 -9 1 61.69 7.4
 10 -9 1 64.29 5.9
 10 -9 1 55.29 6.7
 -11 9 -1 140.99 9
 -11 9 -1 128.69 7.7
 11 -9 1 127.79 8.4
 11 -9 1 136.89 9.1
 -12 9 -1 177.78 10.5
 -12 9 -1 184.08 9.1
 12 -9 1 169.98 10.3
 12 -9 1 174.08 9.9
 -13 9 -1 224.08 10.2
 -13 9 -1 222.58 11.9
 13 -9 1 223.58 11.3
 13 -9 1 223.08 12
 -14 9 -1 92.59 10.7
 -14 9 -1 87.89 8.7
 14 -9 1 88.69 10.1
 14 -9 1 94.09 9.7
 14 -9 1 96.09 10.2
 -15 9 -1 72.29 8.8
 -15 9 -1 72.29 11
 15 -9 1 83.99 10
 15 -9 1 65.49 10.2
 15 -9 1 71.99 10.2
 16 8 -1 21.2 5.9
 -16 -8 1 22.1 7.3
 -16 -8 1 24.8 7.7
 15 8 -1 4.3 5
 -15 -8 1 19.3 7
 -15 -8 1 12.9 6.4
 14 8 -1 1.8 4.5
 -14 -8 1 -5.2 5.9
 -14 -8 1 -0.3 5.8
 -14 -8 1 0.5 3.8
 13 8 -1 72.39 8.2
 -13 -8 1 76.19 6.7
 -13 -8 1 76.59 9.8
 -13 -8 1 70.29 9.1
 12 8 -1 161.88 8.9
 -12 -8 1 163.48 10.2
 -12 -8 1 186.88 10.8
 -12 -8 1 170.08 7.8
 11 8 -1 433.16 13.3
 -11 -8 1 437.26 14.2
 -11 -8 1 432.76 14.7
 -11 -8 1 424.36 12.4
 10 8 -1 192.88 8
 -10 -8 1 191.48 8.9
 -10 -8 1 180.68 9.7
 -10 -8 1 185.18 7.3
 9 8 -1 11 2.8
 -9 -8 1 12.9 2.8
 -9 -8 1 14.4 4.1
 -9 -8 1 12.8 4
 -9 -8 1 13.2 3
 8 8 -1 27.4 4.4
 -8 -8 1 30.1 4.3
 -8 -8 1 31.6 5.9
 -8 -8 1 30.4 4.2
 -8 -8 1 34.5 4.3
 7 8 -1 53.89 4.3
 -7 -8 1 62.49 5.9
 -7 -8 1 56.19 5.2
 -7 -8 1 65.99 5.5
 -7 -8 1 55.59 4.3
 6 8 -1 4.3 1.9
 -6 -8 1 2.5 2.9
 -6 -8 1 7.3 2.9
 -6 -8 1 3.6 2.4
 -6 -8 1 5.9 2
 5 8 -1 149.29 5.1
 -5 -8 1 138.89 5.9
 -5 -8 1 143.29 5.2
 -5 -8 1 146.69 6.6
 -5 -8 1 139.99 5.9
 4 8 -1 133.69 4.7
 -4 -8 1 133.59 5.8
 -4 -8 1 124.89 4.5
 -4 -8 1 138.39 5.7
 -4 -8 1 121.69 5.3
 3 8 -1 651.93 15.5
 3 8 -1 661.03 15.9
 -3 -8 1 631.24 15
 -3 -8 1 640.84 16.2
 -3 -8 1 631.94 16.3
 -3 -8 1 631.54 15.7
 2 8 -1 1274.77 30.2
 2 8 -1 1275.97 30.5
 -2 -8 1 1341.27 31
 -2 -8 1 1344.97 31
 -2 -8 1 1352.36 29.8
 -2 -8 1 1364.86 30.5
 1 8 -1 760.32 18.2
 1 8 -1 777.12 18.4
 -1 -8 1 796.92 18.4
 -1 -8 1 774.92 19
 -1 -8 1 765.92 19
 -1 -8 1 792.32 17.8
 0 8 -1 575.44 13.6
 0 8 -1 556.74 13.3
 0 -8 1 557.04 13.1
 0 -8 1 535.15 14
 0 -8 1 536.65 14.2
 0 -8 1 560.64 13.6
 -1 8 -1 3.3 1.4
 -1 8 -1 1.5 1.5
 1 -8 1 2.7 1.4
 1 -8 1 4.5 1.8
 1 -8 1 4.2 2
 1 -8 1 1.1 1.6
 -2 8 -1 0.2 1.4
 -2 8 -1 1.1 1.5
 2 -8 1 -0.5 1.4
 2 -8 1 0.5 2
 2 -8 1 -0.7 1.4
 2 -8 1 -0.1 1.9
 2 -8 1 -0.3 1.4
 -3 8 -1 255.27 7.5
 -3 8 -1 263.27 7.2
 -3 8 -1 260.77 7.6
 3 -8 1 239.88 7.8
 3 -8 1 259.67 8.1
 3 -8 1 254.07 7.3
 3 -8 1 254.37 7.4
 3 -8 1 253.17 8.4
 3 -8 1 251.87 6.7
 -4 8 -1 874.01 21.2
 -4 8 -1 921.71 21.9
 -4 8 -1 915.21 21.6
 4 -8 1 925.61 22.5
 4 -8 1 894.51 21.9
 4 -8 1 887.21 20.5
 4 -8 1 924.61 21.4
 4 -8 1 893.21 21.8
 -5 8 -1 342.47 9
 5 -8 1 319.17 9.1
 5 -8 1 310.17 9.4
 5 -8 1 311.87 10.1
 -6 8 -1 411.66 11.3
 -6 8 -1 430.66 12
 6 -8 1 427.46 11.6
 6 -8 1 418.06 12.5
 6 -8 1 422.26 11.7
 -7 8 -1 603.74 16.1
 -7 8 -1 600.44 15.4
 7 -8 1 611.14 15.8
 7 -8 1 589.74 15.6
 7 -8 1 601.94 16.6
 -8 8 -1 171.18 7.7
 -8 8 -1 166.18 6.8
 8 -8 1 176.58 7.4
 8 -8 1 165.28 6.9
 8 -8 1 158.18 6.4
 8 -8 1 164.78 8.1
 -9 8 -1 41.2 4.9
 -9 8 -1 39.2 6.1
 9 -8 1 44.5 5.8
 9 -8 1 48.3 5
 9 -8 1 50.09 6.5
 -10 8 -1 19.5 3.4
 -10 8 -1 9.1 3.7
 10 -8 1 14.4 3.2
 10 -8 1 15.4 3.7
 -11 8 -1 28.7 3.9
 -11 8 -1 32.3 4.6
 11 -8 1 28.4 4.4
 11 -8 1 42 8.5
 -12 8 -1 153.58 8.1
 -12 8 -1 140.99 9.6
 12 -8 1 138.39 9.1
 -13 8 -1 104.29 8
 -13 8 -1 107.39 9.7
 13 -8 1 98.49 9.1
 -14 8 -1 310.97 12
 -14 8 -1 292.57 13.9
 14 -8 1 323.27 13.4
 14 -8 1 301.67 13.3
 -15 8 -1 80.09 8.9
 -15 8 -1 81.39 11
 15 -8 1 86.09 10.1
 15 -8 1 86.79 10.4
 15 -8 1 88.89 10.4
 16 7 -1 15.9 5.8
 -16 -7 1 28.1 7
 -16 -7 1 32.2 7.6
 15 7 -1 14.4 5.2
 -15 -7 1 20.2 6.2
 -15 -7 1 17 6.7
 -15 -7 1 24.1 4.5
 14 7 -1 15.4 4.7
 -14 -7 1 17.5 6.1
 -14 -7 1 20.1 4.1
 -14 -7 1 15.1 5.7
 13 7 -1 -5.7 3.8
 -13 -7 1 -1.2 5.1
 -13 -7 1 -0.5 5
 -13 -7 1 -3.3 3.3
 12 7 -1 154.38 8.6
 -12 -7 1 155.18 9.5
 -12 -7 1 144.59 7.1
 -12 -7 1 161.28 9.6
 11 7 -1 241.18 9.4
 -11 -7 1 241.48 8.3
 -11 -7 1 230.18 10.1
 -11 -7 1 233.48 10.5
 -11 -7 1 229.38 11.7
 10 7 -1 215.78 8.4
 -10 -7 1 224.08 9.7
 -10 -7 1 210.58 9.2
 -10 -7 1 210.68 7.5
 -10 -7 1 218.28 8.2
 9 7 -1 620.44 16.4
 -9 -7 1 632.84 16.2
 -9 -7 1 603.84 16.9
 -9 -7 1 635.84 15.7
 -9 -7 1 629.84 17.5
 8 7 -1 62.59 4.8
 -8 -7 1 71.99 4.4
 -8 -7 1 62.69 5.6
 -8 -7 1 61.69 4.6
 -8 -7 1 71.29 6.1
 7 7 -1 294.97 8.7
 -7 -7 1 282.67 9.1
 -7 -7 1 305.47 10
 -7 -7 1 308.57 8.4
 -7 -7 1 304.57 9.4
 -7 -7 1 285.57 8.5
 6 7 -1 9.9 1.9
 -6 -7 1 9.4 2.8
 -6 -7 1 8.2 1.9
 -6 -7 1 10 2.3
 -6 -7 1 10 2.8
 5 7 -1 67.39 3.6
 -5 -7 1 68.69 4.4
 -5 -7 1 71.19 4.9
 -5 -7 1 68.99 4.2
 -5 -7 1 71.69 3.7
 4 7 -1 216.98 6.1
 -4 -7 1 218.38 6.9
 -4 -7 1 212.18 7.3
 -4 -7 1 211.28 6.7
 -4 -7 1 212.28 6.2
 3 7 -1 1011.3 23.1
 -3 -7 1 1004.9 23.9
 -3 -7 1 1023.8 23.4
 -3 -7 1 979.8 22.9
 -3 -7 1 996.4 23.7
 2 7 -1 83.99 3.6
 -2 -7 1 85.59 4.1
 -2 -7 1 85.99 3.1
 1 7 -1 217.58 6.2
 1 7 -1 201.28 5.9
 -1 -7 1 218.48 6.8
 -1 -7 1 225.78 6.2
 -1 -7 1 218.98 5.7
 -1 -7 1 228.08 6.8
 0 7 -1 109.79 3.8
 0 7 -1 109.49 3.9
 0 -7 1 108.59 4.4
 0 -7 1 109.89 3.6
 0 -7 1 110.89 4
 0 -7 1 102.59 4
 0 -7 1 113.29 4.7
 -1 7 -1 574.44 13.6
 -1 7 -1 562.94 13.4
 1 -7 1 537.85 13.2
 1 -7 1 572.74 13.5
 1 -7 1 559.84 13.6
 1 -7 1 548.25 13.9
 1 -7 1 554.34 14.2
 1 -7 1 575.54 13.3
 -2 7 -1 2.7 1.5
 -2 7 -1 1.9 1.4
 2 -7 1 2.5 1.4
 2 -7 1 2.6 1.4
 2 -7 1 3.1 1.3
 2 -7 1 1 1.8
 2 -7 1 2.6 1.8
 -3 7 -1 229.98 6.9
 -3 7 -1 228.78 6.5
 -3 7 -1 229.38 6.8
 3 -7 1 235.88 7.6
 3 -7 1 240.48 6.7
 3 -7 1 236.98 7.2
 3 -7 1 226.38 7
 3 -7 1 229.88 6
 3 -7 1 228.68 6.8
 -4 7 -1 41.1 3.5
 -4 7 -1 37.5 3.1
 -4 7 -1 40 3.5
 4 -7 1 38.6 2.2
 4 -7 1 41.9 3.6
 4 -7 1 33.7 3.4
 4 -7 1 32.2 3.4
 4 -7 1 31.7 4
 -5 7 -1 8 1.8
 -5 7 -1 8.4 2.3
 -5 7 -1 10.9 2.1
 5 -7 1 8.8 2
 -6 7 -1 1159.18 27.2
 -6 7 -1 1181.88 27.8
 6 -7 1 1150.48 27.4
 6 -7 1 1158.88 27.5
 6 -7 1 1158.68 28.2
 6 -7 1 1177.38 27.1
 -7 7 -1 311.77 10
 -7 7 -1 319.07 9.3
 7 -7 1 307.97 9.1
 7 -7 1 326.27 9.5
 7 -7 1 343.37 9.8
 -8 7 -1 630.44 17
 -8 7 -1 624.94 16.1
 8 -7 1 644.54 16.1
 8 -7 1 638.94 16.6
 8 -7 1 628.24 16.3
 -9 7 -1 242.08 9.5
 -9 7 -1 243.78 8.4
 9 -7 1 241.08 9.1
 9 -7 1 262.47 8.6
 -10 7 -1 56.49 5.3
 -10 7 -1 55.99 6.6
 10 -7 1 53.19 6.4
 10 -7 1 61.69 5.3
 -11 7 -1 37.2 5.8
 -11 7 -1 28.1 4.4
 11 -7 1 32 5.4
 11 -7 1 27.7 4.3
 -12 7 -1 42.9 6.3
 -12 7 -1 51.59 7.7
 12 -7 1 34.9 4.8
 -13 7 -1 82.19 9.1
 -13 7 -1 67.59 7.3
 13 -7 1 67.29 8.3
 -14 7 -1 77.19 8
 -14 7 -1 59.99 9.6
 14 -7 1 59.49 9.3
 14 -7 1 76.39 9.1
 -15 7 -1 71.29 10.9
 -15 7 -1 94.99 8.8
 15 -7 1 80.19 10.1
 15 -7 1 87.89 10
 -16 7 -1 174.18 10.6
 -16 7 -1 162.98 13
 16 -7 1 174.58 12.3
 16 -7 1 183.68 11.8
 16 6 -1 36.6 6.2
 -16 -6 1 49.6 7.4
 -16 -6 1 60.89 8.1
 -16 -6 1 50.29 8.2
 15 6 -1 31.2 5.6
 -15 -6 1 58.69 10.1
 -15 -6 1 34.6 4.6
 14 6 -1 28.6 4.9
 -14 -6 1 24.1 4
 -14 -6 1 24.3 5.7
 13 6 -1 19.6 4.4
 -13 -6 1 24.1 3.7
 -13 -6 1 25 5.3
 12 6 -1 54.09 6.8
 -12 -6 1 50.99 7.6
 11 6 -1 135.39 7.6
 -11 -6 1 136.29 8.4
 -11 -6 1 144.19 7.4
 -11 -6 1 144.19 6.3
 10 6 -1 214.98 8.5
 -10 -6 1 230.98 7.5
 -10 -6 1 220.58 8.2
 -10 -6 1 216.88 9.4
 9 6 -1 337.97 10.3
 -9 -6 1 344.27 9.5
 -9 -6 1 339.27 10.1
 -9 -6 1 321.07 11.1
 8 6 -1 291.57 8.9
 -8 -6 1 287.47 8.2
 -8 -6 1 288.37 8.7
 -8 -6 1 299.57 9.9
 7 6 -1 171.08 6.2
 -7 -6 1 167.38 7.1
 -7 -6 1 171.18 6
 -7 -6 1 180.98 5.7
 6 6 -1 674.23 16.5
 -6 -6 1 696.53 17.4
 -6 -6 1 683.63 16.9
 -6 -6 1 659.13 16.9
 -6 -6 1 676.53 16.4
 -6 -6 1 692.43 16.2
 5 6 -1 62.89 3.4
 -5 -6 1 59.69 4.3
 -5 -6 1 72.69 4
 -5 -6 1 63.79 3.4
 -5 -6 1 59.69 3.3
 -5 -6 1 63.29 4.1
 4 6 -1 27.1 2.5
 -4 -6 1 25.8 3.2
 -4 -6 1 22.1 3.6
 -4 -6 1 27 3.1
 -4 -6 1 26.2 2.7
 3 6 -1 1585.04 35
 -3 -6 1 1571.04 35.5
 -3 -6 1 1563.94 35.2
 -3 -6 1 1579.34 35.7
 -3 -6 1 1485.55 35
 2 6 -1 246.58 6.5
 2 6 -1 252.77 6.8
 -2 -6 1 242.68 7
 -2 -6 1 248.18 6.8
 -2 -6 1 236.18 7.2
 -2 -6 1 236.38 6.2
 1 6 -1 569.74 14
 1 6 -1 560.34 13.8
 -1 -6 1 585.94 14.3
 -1 -6 1 602.74 13.6
 -1 -6 1 598.54 13.9
 -1 -6 1 599.84 14.4
 0 6 -1 1479.95 32.3
 0 6 -1 1438.26 32.1
 0 -6 1 1410.86 32.5
 0 -6 1 1388.76 32.5
 0 -6 1 1398.56 32.7
 0 -6 1 1458.45 32.2
 0 -6 1 1433.36 31.9
 -1 6 -1 1338.27 30
 -1 6 -1 1314.27 29.8
 1 -6 1 1291.97 30.2
 1 -6 1 1321.57 30.4
 1 -6 1 1300.87 29.6
 1 -6 1 1351.66 29.8
 1 -6 1 1327.57 29.7
 1 -6 1 1316.37 30
 -2 6 -1 37.4 2.6
 -2 6 -1 30.8 2.6
 2 -6 1 33.2 2.5
 2 -6 1 35.2 2.6
 2 -6 1 34.8 2.9
 2 -6 1 31.7 2.1
 2 -6 1 33.5 3
 2 -6 1 35.4 3.3
 -3 6 -1 107.19 4.2
 -3 6 -1 103.99 3.9
 -3 6 -1 104.29 4.1
 3 -6 1 106.29 3.2
 3 -6 1 108.79 4.1
 3 -6 1 108.79 4.4
 3 -6 1 103.79 4.2
 3 -6 1 103.79 4.8
 -4 6 -1 16.2 2.6
 -4 6 -1 27.6 3.1
 -4 6 -1 28.8 3.1
 4 -6 1 25.7 1.7
 4 -6 1 23.4 3
 4 -6 1 20.7 2.6
 4 -6 1 25.2 2.9
 -5 6 -1 15.7 2.5
 -5 6 -1 13.9 1.9
 -5 6 -1 15.2 2.2
 5 -6 1 12.2 2
 5 -6 1 16.5 2.8
 5 -6 1 19.9 2.5
 -6 6 -1 202.28 6.4
 -6 6 -1 215.68 7.3
 -6 6 -1 198.78 7.1
 6 -6 1 194.28 6.8
 6 -6 1 198.58 6.5
 6 -6 1 204.78 6.3
 -7 6 -1 1328.87 30.9
 -7 6 -1 1320.27 30.6
 -7 6 -1 1308.27 31.3
 7 -6 1 1327.77 30.6
 7 -6 1 1324.97 30.8
 7 -6 1 1315.07 31
 -8 6 -1 251.97 8.8
 -8 6 -1 236.28 7.8
 8 -6 1 240.48 8.3
 8 -6 1 240.38 7.6
 8 -6 1 240.08 7.8
 -9 6 -1 381.16 10.9
 -9 6 -1 380.46 12
 9 -6 1 396.66 11.7
 9 -6 1 375.56 11
 -10 6 -1 281.17 9.3
 -10 6 -1 273.27 10.5
 10 -6 1 295.47 10.3
 10 -6 1 300.27 9.4
 -11 6 -1 111.89 6.6
 -11 6 -1 108.59 7.9
 11 -6 1 109.79 6.4
 11 -6 1 94.99 7.7
 -12 6 -1 -2.7 3.2
 -12 6 -1 4.3 3.9
 12 -6 1 -2.8 3.7
 -13 6 -1 44.9 8.4
 -13 6 -1 53.09 6.7
 13 -6 1 44.8 7.7
 -14 6 -1 20.7 5.4
 -14 6 -1 26.4 4.7
 14 -6 1 17.9 5.1
 14 -6 1 22.8 5.2
 -15 6 -1 110.29 8.9
 -15 6 -1 106.29 11.2
 15 -6 1 129.39 10.5
 15 -6 1 127.69 10.5
 -16 6 -1 237.28 11.5
 -16 6 -1 244.98 13.9
 16 -6 1 244.48 12.8
 16 -6 1 232.48 13.1
 16 5 -1 123.89 10.8
 -16 -5 1 146.29 11.9
 -16 -5 1 129.89 8.7
 15 5 -1 112.49 9.9
 -15 -5 1 113.19 10.8
 -15 -5 1 106.99 7.9
 14 5 -1 107.69 9.2
 -14 -5 1 127.29 7.3
 -14 -5 1 122.19 10.2
 13 5 -1 24.1 4.4
 -13 -5 1 41.4 7.8
 -13 -5 1 41 5.6
 -13 -5 1 31.9 4.4
 12 5 -1 9.8 3.6
 -12 -5 1 11.4 3.6
 -12 -5 1 12.2 4.4
 -12 -5 1 16.2 3.1
 11 5 -1 79.99 6.5
 -11 -5 1 84.89 5.3
 -11 -5 1 79.69 6.3
 -11 -5 1 86.49 7.2
 10 5 -1 449.56 12.8
 -10 -5 1 428.76 13.6
 -10 -5 1 445.06 11.9
 -10 -5 1 449.26 12.7
 9 5 -1 463.45 12.8
 -9 -5 1 465.75 13.6
 -9 -5 1 458.15 12
 -9 -5 1 469.55 12.8
 8 5 -1 151.78 6.1
 -8 -5 1 158.18 5.3
 -8 -5 1 153.58 7
 -8 -5 1 155.28 6
 7 5 -1 486.35 12.7
 -7 -5 1 491.85 13.6
 -7 -5 1 499.65 12.7
 -7 -5 1 506.05 12.2
 6 5 -1 401.96 10.6
 -6 -5 1 396.96 10.1
 -6 -5 1 413.26 10.5
 -6 -5 1 419.56 11.5
 5 5 -1 1155.28 26.6
 -5 -5 1 1162.88 26.6
 -5 -5 1 1157.58 26.3
 -5 -5 1 1172.08 27.3
 -5 -5 1 1148.29 26.9
 4 5 -1 241.68 6.5
 -4 -5 1 251.97 7
 -4 -5 1 240.28 6.5
 -4 -5 1 239.38 6.9
 -4 -5 1 244.88 6.6
 -4 -5 1 238.08 7.4
 3 5 -1 3.4 1.1
 -3 -5 1 1.5 1.4
 -3 -5 1 2.8 1.3
 -3 -5 1 3.2 1.7
 -3 -5 1 1.3 1.7
 2 5 -1 2277.97 50.19
 -2 -5 1 2256.57 50.19
 -2 -5 1 2235.38 50.59
 -2 -5 1 2278.27 50.69
 -2 -5 1 2264.97 50.29
 1 5 -1 357.96 9.3
 1 5 -1 348.27 9
 -1 -5 1 369.06 9.4
 -1 -5 1 370.26 9.4
 -1 -5 1 381.46 9
 -1 -5 1 378.86 8.8
 0 5 -1 5601.44 119.79
 0 5 -1 5472.85 119.79
 0 -5 1 5283.67 119.49
 0 -5 1 5351.96 118.99
 0 -5 1 5261.27 119.59
 0 -5 1 5402.96 119.49
 0 -5 1 5586.44 119.19
 -1 5 -1 784.72 18.1
 -1 5 -1 806.42 18.3
 1 -5 1 800.52 18.1
 1 -5 1 792.72 17.9
 1 -5 1 774.42 18.6
 1 -5 1 785.82 18.4
 1 -5 1 790.92 18
 1 -5 1 794.32 18.3
 -2 5 -1 794.52 18.4
 -2 5 -1 814.02 18.6
 2 -5 1 776.02 18.6
 2 -5 1 802.12 18.5
 2 -5 1 798.22 18.3
 2 -5 1 801.12 18.9
 2 -5 1 796.72 18
 2 -5 1 795.12 18.7
 -3 5 -1 119.99 4.3
 -3 5 -1 115.09 3.9
 -3 5 -1 109.79 4.1
 3 -5 1 113.99 3.2
 3 -5 1 118.59 4.1
 3 -5 1 115.49 4.2
 3 -5 1 117.39 4.6
 3 -5 1 111.89 4.1
 -4 5 -1 93.29 4.2
 -4 5 -1 94.09 4.1
 -4 5 -1 84.69 3.6
 4 -5 1 94.09 3.8
 4 -5 1 90.89 3.4
 4 -5 1 91.59 4
 -5 5 -1 246.88 7
 -5 5 -1 241.68 7.6
 -5 5 -1 234.28 6.9
 -5 5 -1 241.08 7.4
 5 -5 1 256.37 6.9
 5 -5 1 241.08 7.2
 5 -5 1 245.28 7
 -6 5 -1 59.69 3.6
 -6 5 -1 59.99 4.2
 -6 5 -1 61.89 3.6
 6 -5 1 62.99 3.6
 6 -5 1 62.19 4.1
 6 -5 1 64.39 3.5
 -7 5 -1 362.16 9.9
 -7 5 -1 351.76 10.4
 -7 5 -1 356.06 9.7
 7 -5 1 345.77 9.7
 7 -5 1 358.56 9.7
 7 -5 1 356.86 10.2
 -8 5 -1 341.77 10.5
 -8 5 -1 333.07 9.6
 8 -5 1 330.77 9.5
 8 -5 1 331.07 9.6
 8 -5 1 340.47 10.1
 -9 5 -1 54.89 5.6
 -9 5 -1 47.5 4.6
 9 -5 1 46.6 4.3
 9 -5 1 59.09 5.3
 -10 5 -1 116.29 7.2
 -10 5 -1 121.29 6.1
 10 -5 1 117.29 5.9
 10 -5 1 125.19 6.9
 -11 5 -1 189.68 9.2
 -11 5 -1 207.88 8
 11 -5 1 187.08 7.7
 11 -5 1 190.68 8.9
 -12 5 -1 89.89 6.5
 -12 5 -1 93.49 8.2
 12 -5 1 80.09 6.2
 12 -5 1 68.99 7.5
 -13 5 -1 1.8 3.5
 -13 5 -1 9 4.3
 13 -5 1 5.6 4.2
 -14 5 -1 1.5 4.5
 -14 5 -1 5.3 4
 14 -5 1 -2.9 4.3
 14 -5 1 -4.5 4.2
 -15 5 -1 7.4 4.5
 -15 5 -1 1.9 5.2
 15 -5 1 4 4.8
 15 -5 1 -4 4.8
 -16 5 -1 121.59 9.2
 -16 5 -1 113.19 11.7
 16 -5 1 115.59 11
 17 4 -1 140.69 12
 -17 -4 1 149.88 12.7
 -17 -4 1 143.59 9.5
 16 4 -1 175.68 11.9
 -16 -4 1 188.28 9.5
 -16 -4 1 190.58 12.4
 15 4 -1 110.29 9.7
 -15 -4 1 107.99 10.4
 -15 -4 1 104.69 7.4
 -15 -4 1 108.89 12.9
 14 4 -1 90.09 8.7
 -14 -4 1 90.09 8.5
 -14 -4 1 85.99 6.8
 13 4 -1 22.6 4.3
 -13 -4 1 23.8 3.6
 -13 -4 1 27.6 4.4
 12 4 -1 3.3 3.4
 -12 -4 1 11.6 3
 -12 -4 1 9.1 3.4
 11 4 -1 6.3 3.1
 -11 -4 1 6.7 3
 -11 -4 1 5.2 2.5
 10 4 -1 117.39 6.4
 -10 -4 1 119.99 6.4
 -10 -4 1 113.59 5.3
 9 4 -1 99.69 5.6
 -9 -4 1 108.79 5.7
 -9 -4 1 113.49 4.8
 8 4 -1 130.39 5.7
 -8 -4 1 132.29 4.9
 -8 -4 1 136.49 5.6
 7 4 -1 406.36 10.9
 -7 -4 1 417.76 10.9
 -7 -4 1 413.16 10.4
 6 4 -1 740.73 17.9
 -6 -4 1 759.62 17.5
 -6 -4 1 763.52 18
 -6 -4 1 743.23 18.6
 5 4 -1 962.6 22.5
 -5 -4 1 976.3 22.1
 -5 -4 1 964.2 22.6
 -5 -4 1 969.8 22.5
 -5 -4 1 986.5 23.1
 4 4 -1 388.16 9.7
 -4 -4 1 397.06 9.7
 -4 -4 1 384.66 9.9
 -4 -4 1 397.66 10.3
 -4 -4 1 397.56 9.5
 3 4 -1 575.94 13.7
 -3 -4 1 581.74 13.6
 -3 -4 1 593.74 13.7
 -3 -4 1 578.74 14.2
 -3 -4 1 573.94 13.9
 -3 -4 1 615.34 13.9
 2 4 -1 849.41 19.2
 -2 -4 1 862.91 19.4
 -2 -4 1 840.82 19.5
 -2 -4 1 836.52 19.4
 -2 -4 1 855.41 19.7
 1 4 -1 967.3 21.6
 1 4 -1 932.91 21.3
 -1 -4 1 937.11 21.6
 -1 -4 1 939.01 21.1
 -1 -4 1 944.71 21.2
 -1 -4 1 921.41 21.5
 0 4 -1 2339.67 50.19
 0 4 -1 2266.07 49.99
 0 -4 1 2312.17 49.99
 0 -4 1 2242.38 49.9
 0 -4 1 2187.98 50.29
 0 -4 1 2236.28 50.19
 0 -4 1 2231.58 50.29
 -1 4 -1 2694.53 58.59
 -1 4 -1 2597.94 58.49
 1 -4 1 2663.13 58.89
 1 -4 1 2641.74 58.59
 1 -4 1 2677.03 58.39
 1 -4 1 2564.04 58.69
 1 -4 1 2686.33 58.39
 1 -4 1 2643.14 58.29
 -2 4 -1 617.94 14.6
 -2 4 -1 633.74 14.7
 2 -4 1 643.04 15.1
 2 -4 1 605.04 14.6
 2 -4 1 631.44 14.1
 2 -4 1 615.74 14.7
 2 -4 1 634.84 14.5
 2 -4 1 621.84 14.7
 -3 4 -1 82.69 3.4
 -3 4 -1 76.69 3.3
 -3 4 -1 82.69 3
 3 -4 1 75.49 3.1
 3 -4 1 75.19 2.8
 3 -4 1 77.39 3.2
 3 -4 1 81.39 3.1
 -4 4 -1 1497.45 34
 -4 4 -1 1468.85 33.8
 -4 4 -1 1510.25 33.6
 -4 4 -1 1455.95 33.4
 4 -4 1 1499.65 33.5
 4 -4 1 1490.65 33.6
 4 -4 1 1481.35 33.7
 -5 4 -1 64.09 3.8
 -5 4 -1 67.29 3.3
 -5 4 -1 59.39 3.3
 5 -4 1 61.89 3.1
 5 -4 1 65.39 3.7
 5 -4 1 65.39 3.1
 -6 4 -1 34.8 3.7
 -6 4 -1 24.4 3
 -6 4 -1 33.7 3.1
 6 -4 1 31.3 3.5
 6 -4 1 33.7 2.9
 6 -4 1 32.9 2.8
 -7 4 -1 1018 24.1
 -7 4 -1 1031.3 24.8
 7 -4 1 1030.5 24.2
 7 -4 1 1026.5 24.2
 7 -4 1 1052.49 24.6
 -8 4 -1 657.23 17
 -8 4 -1 647.04 16.1
 8 -4 1 634.34 16.2
 8 -4 1 660.73 16.7
 8 -4 1 661.43 16.2
 -9 4 -1 256.87 8.2
 -9 4 -1 278.47 9.4
 9 -4 1 262.47 8.3
 9 -4 1 266.77 8.9
 -10 4 -1 828.42 21.5
 -10 4 -1 816.52 20.3
 10 -4 1 801.52 20.5
 10 -4 1 844.32 21.1
 -11 4 -1 171.28 7.3
 -11 4 -1 175.48 8.7
 11 -4 1 182.08 7.4
 11 -4 1 180.48 8.4
 -12 4 -1 132.89 7
 -12 4 -1 128.29 8.7
 12 -4 1 125.39 6.9
 12 -4 1 119.49 8.2
 -13 4 -1 113.59 8.9
 -13 4 -1 118.99 7.4
 13 -4 1 97.49 8.7
 -14 4 -1 2 4.5
 -14 4 -1 2.8 3.8
 14 -4 1 0.1 4.3
 14 -4 1 3.4 4.4
 -15 4 -1 1.8 4.2
 -15 4 -1 2.3 5
 15 -4 1 -1.6 4.7
 15 -4 1 7.4 4.7
 -16 4 -1 108.89 11.3
 -16 4 -1 114.29 9.1
 16 -4 1 110.99 10.8
 -17 4 -1 250.17 12.1
 -17 4 -1 267.57 14.6
 17 -4 1 252.17 14
 17 3 -1 30.2 6.4
 -17 -3 1 31.2 5.2
 -17 -3 1 32.4 7.1
 16 3 -1 146.79 11
 -16 -3 1 147.09 9
 -16 -3 1 127.69 11.7
 15 3 -1 293.77 12.8
 -15 -3 1 292.17 10.9
 -15 -3 1 304.47 12.8
 14 3 -1 308.17 12.3
 -14 -3 1 296.07 10.5
 -14 -3 1 302.17 12.2
 13 3 -1 306.87 11.6
 -13 -3 1 330.57 12
 -13 -3 1 306.97 10.3
 12 3 -1 174.68 8.7
 -12 -3 1 172.48 8.6
 -12 -3 1 186.58 7.3
 11 3 -1 12.5 3.2
 -11 -3 1 12.7 2.8
 -11 -3 1 8.1 3.1
 10 3 -1 86.49 5.9
 -10 -3 1 94.79 4.9
 -10 -3 1 96.49 6
 9 3 -1 356.26 10.6
 -9 -3 1 353.06 10.7
 -9 -3 1 371.56 9.8
 8 3 -1 988.4 23.3
 -8 -3 1 951.2 22.6
 -8 -3 1 976.8 23.3
 7 3 -1 1114.79 26.3
 -7 -3 1 1120.69 26.3
 -7 -3 1 1134.79 25.7
 6 3 -1 2072.09 47.2
 -6 -3 1 2121.69 47.2
 -6 -3 1 2094.49 46.8
 5 3 -1 640.44 15.2
 -5 -3 1 631.74 14.8
 -5 -3 1 637.44 15.2
 4 3 -1 186.48 5.3
 -4 -3 1 186.38 5
 -4 -3 1 188.38 5.3
 -4 -3 1 187.88 5.3
 3 3 -1 5.5 1.1
 -3 -3 1 7.4 1.8
 -3 -3 1 4.6 1.1
 -3 -3 1 9.1 1.6
 -3 -3 1 6.7 1
 2 3 -1 1044.7 24
 -2 -3 1 1113.69 24.2
 -2 -3 1 1062.29 24.1
 -2 -3 1 1081.19 24.5
 -2 -3 1 1058.29 24.2
 -2 -3 1 1085.39 24.2
 1 3 -1 42.9 1.9
 -1 -3 1 41.5 2
 -1 -3 1 39.9 2.1
 -1 -3 1 42.6 2.3
 -1 -3 1 45.5 2.1
 0 3 -1 1826.42 40.7
 0 3 -1 1903.51 40.9
 0 -3 1 1834.72 41
 0 -3 1 1898.21 40.6
 0 -3 1 1774.62 40.9
 0 -3 1 1835.32 40.6
 0 -3 1 1806.62 40.9
 -1 3 -1 29.2 1.9
 -1 3 -1 29.4 1.8
 1 -3 1 30.5 1.9
 1 -3 1 28.7 2.2
 1 -3 1 27.8 1.9
 1 -3 1 28.9 1.5
 1 -3 1 31.5 1.8
 -2 3 -1 2121.69 47.7
 -2 3 -1 2158.18 47.7
 -2 3 -1 2129.89 47.5
 2 -3 1 2064.29 47.6
 2 -3 1 2143.09 47.6
 2 -3 1 2173.18 47.1
 2 -3 1 2163.18 47.6
 2 -3 1 2197.28 47.8
 -3 3 -1 1560.24 34
 -3 3 -1 1498.25 34.2
 -3 3 -1 1522.25 34
 -3 3 -1 1527.85 34.4
 3 -3 1 1494.25 34.1
 3 -3 1 1518.35 34
 3 -3 1 1525.45 34
 -4 3 -1 16.7 2.5
 -4 3 -1 13.5 2.5
 -4 3 -1 19.5 2.1
 -4 3 -1 18.4 2.1
 4 -3 1 16 2.4
 4 -3 1 18.9 2
 4 -3 1 20.9 2
 -5 3 -1 297.27 7.7
 -5 3 -1 283.67 7.6
 -5 3 -1 285.87 8.1
 5 -3 1 295.67 7.6
 5 -3 1 286.17 7.6
 5 -3 1 277.17 7.8
 -6 3 -1 25.1 3.4
 -6 3 -1 22.1 2.8
 -6 3 -1 23.2 2.8
 6 -3 1 26.8 2.6
 6 -3 1 25.9 3.3
 6 -3 1 29.7 2.7
 -7 3 -1 77.39 4.7
 -7 3 -1 78.69 3.9
 7 -3 1 76.59 4.5
 7 -3 1 78.49 3.9
 7 -3 1 82.89 3.9
 -8 3 -1 73.99 5
 -8 3 -1 79.69 4.3
 8 -3 1 63.29 4.8
 8 -3 1 78.89 4.1
 8 -3 1 73.59 4
 -9 3 -1 203.48 7.9
 -9 3 -1 194.38 6.8
 9 -3 1 192.28 7.5
 9 -3 1 197.38 6.9
 -10 3 -1 698.23 17.5
 -10 3 -1 699.43 18.5
 10 -3 1 665.63 17.6
 10 -3 1 698.73 18.3
 -11 3 -1 372.06 11
 -11 3 -1 368.16 12.4
 11 -3 1 380.86 12.1
 11 -3 1 362.56 11.1
 -12 3 -1 347.77 11.2
 -12 3 -1 376.66 12.8
 12 -3 1 358.56 12.5
 12 -3 1 355.96 11.3
 -13 3 -1 158.18 9.4
 -13 3 -1 154.38 7.9
 13 -3 1 149.39 9.4
 13 -3 1 165.58 9.5
 13 -3 1 152.18 7.8
 -14 3 -1 27.5 5.1
 -14 3 -1 31.7 4.5
 14 -3 1 20.4 4.8
 14 -3 1 31.1 5
 -15 3 -1 -5.8 4.7
 -15 3 -1 -5.8 4
 15 -3 1 3 4.5
 15 -3 1 -6.1 4.5
 -16 3 -1 63.69 8.2
 -16 3 -1 63.49 10.4
 16 -3 1 57.59 10
 -17 3 -1 48.3 5.9
 -17 3 -1 48.2 7.1
 17 -3 1 56.79 10.8
 17 2 -1 -3.6 5.6
 -17 -2 1 -1.1 6.2
 -17 -2 1 1.3 4.7
 16 2 -1 211.88 12.2
 -16 -2 1 210.78 10.1
 -16 -2 1 197.18 12
 15 2 -1 255.07 12.2
 -15 -2 1 250.67 12
 -15 -2 1 250.47 10.1
 14 2 -1 280.57 11.9
 -14 -2 1 279.27 11.9
 -14 -2 1 273.47 10.1
 13 2 -1 273.17 11
 -13 -2 1 259.87 11
 -13 -2 1 271.07 9.5
 12 2 -1 99.39 7.3
 -12 -2 1 114.69 6.1
 -12 -2 1 114.09 7.6
 11 2 -1 305.57 10.5
 -11 -2 1 303.17 9.3
 -11 -2 1 310.57 10.6
 10 2 -1 14.1 2.9
 -10 -2 1 13.4 2.9
 -10 -2 1 17.2 2.5
 9 2 -1 140.89 6.2
 -9 -2 1 142.59 5.4
 -9 -2 1 141.09 6.3
 8 2 -1 55.89 4.2
 -8 -2 1 52.79 4.2
 -8 -2 1 52.39 3.5
 7 2 -1 177.98 6
 -7 -2 1 176.98 5.4
 -7 -2 1 174.68 6.1
 6 2 -1 601.14 14.8
 -6 -2 1 597.44 14.8
 -6 -2 1 624.04 14.4
 5 2 -1 2537.35 57.09
 -5 -2 1 2598.04 57.19
 -5 -2 1 2557.44 56.79
 4 2 -1 1553.74 34.9
 -4 -2 1 1541.05 34.9
 -4 -2 1 1564.14 34.6
 3 2 -1 1189.18 26.7
 -3 -2 1 1192.78 26.6
 -3 -2 1 1188.68 26.7
 -3 -2 1 1177.48 26.5
 2 2 -1 2.7 0.9
 -2 -2 1 9 1.4
 -2 -2 1 5.4 1.4
 -2 -2 1 5 1.4
 -2 -2 1 4 1.4
 1 2 -1 1233.98 26.2
 1 2 -1 1162.08 26
 -1 -2 1 1109.09 26
 -1 -2 1 1156.78 26.1
 -1 -2 1 1157.18 26
 -1 -2 1 1185.98 26.2
 0 2 -1 1415.36 31.4
 0 2 -1 1375.66 31.4
 0 2 -1 1413.76 31.5
 0 -2 1 1391.06 31.5
 0 -2 1 1461.25 31.5
 0 -2 1 1409.06 31.6
 0 -2 1 1420.56 31.4
 0 -2 1 1446.56 31.3
 -1 2 -1 1359.96 30.2
 -1 2 -1 1380.46 30.6
 -1 2 -1 1362.56 30.5
 1 -2 1 1404.26 30.5
 1 -2 1 1363.36 30.6
 1 -2 1 1401.56 30.5
 1 -2 1 1336.27 30.5
 1 -2 1 1387.96 30.2
 -2 2 -1 177.78 4.6
 -2 2 -1 183.78 4.6
 -2 2 -1 181.78 4.9
 -2 2 -1 178.28 4.8
 2 -2 1 171.28 4.5
 2 -2 1 178.98 4.5
 2 -2 1 173.48 4.7
 2 -2 1 174.48 4.5
 -3 2 -1 640.04 15.3
 -3 2 -1 656.13 15.1
 -3 2 -1 639.44 15
 -3 2 -1 666.83 15.4
 3 -2 1 648.74 15
 3 -2 1 656.23 15.2
 3 -2 1 670.83 15.1
 -4 2 -1 1646.94 36
 -4 2 -1 1612.04 36.2
 -4 2 -1 1605.04 35.8
 4 -2 1 1622.04 35.9
 4 -2 1 1576.04 36
 4 -2 1 1554.54 35.8
 -5 2 -1 933.61 21.8
 -5 2 -1 915.61 21.3
 -5 2 -1 936.81 21.5
 5 -2 1 930.71 21.6
 5 -2 1 953.4 21.5
 5 -2 1 912.71 21.4
 -6 2 -1 2.1 1.7
 -6 2 -1 2.8 1.5
 6 -2 1 2.1 1.3
 6 -2 1 1.2 1.7
 -7 2 -1 211.38 6.4
 -7 2 -1 218.38 7.3
 7 -2 1 219.88 7.1
 7 -2 1 222.18 7.3
 -8 2 -1 471.15 12.6
 -8 2 -1 446.36 11.7
 8 -2 1 444.46 12.2
 -9 2 -1 509.05 13.1
 -9 2 -1 515.35 14.1
 9 -2 1 498.15 13.8
 -10 2 -1 677.33 17.2
 -10 2 -1 678.63 18.3
 10 -2 1 700.93 18.1
 -11 2 -1 302.67 10.7
 -11 2 -1 287.77 9.4
 11 -2 1 291.47 9.7
 11 -2 1 302.17 10.4
 -12 2 -1 603.74 17.4
 -12 2 -1 602.54 16
 12 -2 1 590.24 17.1
 12 -2 1 582.14 16.4
 -13 2 -1 56.09 6.3
 -13 2 -1 64.19 7.8
 13 -2 1 50.09 6.2
 13 -2 1 57.29 7.5
 13 -2 1 48.6 7.6
 -14 2 -1 133.79 7.9
 -14 2 -1 147.69 9.7
 14 -2 1 128.59 9.4
 14 -2 1 143.59 9.6
 -15 2 -1 13 5
 -15 2 -1 4.3 4
 15 -2 1 12.7 4.7
 15 -2 1 13 4.8
 -16 2 -1 -8.9 4.9
 -16 2 -1 -4.2 4.1
 16 -2 1 -2.5 5.1
 -17 2 -1 46.7 5.8
 -17 2 -1 70.99 11.2
 17 -2 1 44.5 6.8
 17 1 -1 18.8 6.1
 -17 -1 1 17.5 6.1
 -17 -1 1 19 5.1
 16 1 -1 29.4 5.9
 -16 -1 1 27.8 4.9
 -16 -1 1 25.3 5.7
 15 1 -1 350.16 14
 -15 -1 1 350.56 14
 -15 -1 1 354.36 12.2
 14 1 -1 462.75 15.4
 -14 -1 1 450.15 13.7
 -14 -1 1 481.35 15.6
 13 1 -1 631.04 18.2
 -13 -1 1 627.34 16.9
 -13 -1 1 643.64 18.4
 12 1 -1 535.45 15.8
 -12 -1 1 538.65 14.6
 -12 -1 1 557.34 16.1
 11 1 -1 54.49 5.9
 -11 -1 1 58.49 4.8
 -11 -1 1 69.39 6.2
 10 1 -1 4.2 2.6
 -10 -1 1 1.6 2.2
 -10 -1 1 4.2 2.6
 9 1 -1 2.5 2.3
 -9 -1 1 2.2 2.3
 -9 -1 1 -0.3 1.9
 8 1 -1 345.67 10.1
 8 1 -1 366.76 10.1
 -8 -1 1 362.56 9.5
 -8 -1 1 358.16 10.3
 7 1 -1 547.05 14
 7 1 -1 551.74 14
 -7 -1 1 571.84 14.1
 -7 -1 1 556.74 13.5
 6 1 -1 3637.44 81.89
 6 1 -1 3695.63 81.89
 -6 -1 1 3709.43 81.99
 -6 -1 1 3712.43 81.49
 5 1 -1 264.87 7
 5 1 -1 247.48 7
 -5 -1 1 257.37 6.6
 -5 -1 1 258.07 7.1
 4 1 -1 1094.49 24.7
 4 1 -1 1061.29 24.7
 -4 -1 1 1100.59 24.5
 -4 -1 1 1097.09 24.8
 3 1 -1 446.76 10.6
 -3 -1 1 449.46 10.3
 -3 -1 1 446.86 10.6
 2 1 -1 1823.82 40.8
 -2 -1 1 1851.61 40.9
 -2 -1 1 1848.02 40.7
 -2 -1 1 1860.01 40.7
 1 1 -1 249.58 6
 1 1 -1 238.28 5.9
 1 1 -1 263.97 6.2
 -1 -1 1 254.97 5.9
 -1 -1 1 249.88 5.9
 -1 -1 1 256.17 6
 0 1 -1 238.18 5.3
 0 1 -1 236.38 5.5
 0 1 -1 247.28 5.6
 0 1 -1 223.48 5.5
 0 1 -1 222.18 5.6
 0 1 -1 226.18 5.5
 0 -1 1 236.08 5.5
 0 -1 1 223.98 5.5
 0 -1 1 230.48 5.6
 0 -1 1 233.28 5.3
 -1 1 -1 1722.43 39.1
 -1 1 -1 1785.92 39.2
 -1 1 -1 1821.92 39.2
 -1 1 -1 1764.62 39.3
 -1 1 -1 1788.02 39.3
 1 -1 1 1789.02 39.2
 1 -1 1 1745.83 39.1
 1 -1 1 1806.92 39.4
 1 -1 1 1752.12 39.2
 1 -1 1 1811.42 39.3
 -2 1 -1 33.7 1.9
 -2 1 -1 33.2 1.8
 -2 1 -1 32.1 1.5
 -2 1 -1 34.4 1.6
 2 -1 1 30.4 1.3
 2 -1 1 31.7 1.7
 2 -1 1 34.6 1.6
 -3 1 -1 4459.95 97.99
 -3 1 -1 4445.46 98.19
 -3 1 -1 4453.75 98.09
 3 -1 1 4557.74 98.09
 3 -1 1 4391.06 98.09
 -4 1 -1 3615.14 79.39
 -4 1 -1 3575.24 78.99
 -4 1 -1 3659.53 79.09
 4 -1 1 3568.34 79.09
 4 -1 1 3506.65 79.19
 -5 1 -1 184.38 5.1
 -5 1 -1 183.98 5.7
 5 -1 1 180.38 5.5
 -6 1 -1 466.65 11.3
 -6 1 -1 468.75 12
 6 -1 1 459.55 11.8
 -7 1 -1 104.19 4.9
 -7 1 -1 111.19 4.1
 7 -1 1 98.69 4.7
 -8 1 -1 126.29 5.7
 -8 1 -1 122.29 4.8
 8 -1 1 123.79 5.5
 -9 1 -1 595.24 15
 -9 1 -1 602.54 16
 9 -1 1 610.14 15.8
 -10 1 -1 9.9 2.5
 -10 1 -1 16.2 3
 -11 1 -1 581.14 15.3
 -11 1 -1 581.64 16.5
 11 -1 1 591.84 16.3
 -12 1 -1 156.78 7
 -12 1 -1 154.38 8.4
 12 -1 1 139.29 8.1
 12 -1 1 147.99 8.1
 -13 1 -1 623.34 16.8
 -13 1 -1 638.04 18.5
 13 -1 1 617.94 18.2
 13 -1 1 624.54 18.2
 -14 1 -1 247.98 9.8
 -14 1 -1 261.67 11.6
 14 -1 1 242.88 11.3
 14 -1 1 265.57 11.5
 -15 1 -1 107.99 9.9
 -15 1 -1 98.39 7.9
 15 -1 1 97.59 9.5
 -16 1 -1 4.6 4.3
 -16 1 -1 -6 5.1
 16 -1 1 -0.2 5
 -17 1 -1 71.49 11.1
 -17 1 -1 69.19 8.5
 17 -1 1 50.29 7
 17 0 -1 20.1 6.3
 -17 0 1 31.4 5.4
 -17 0 1 20.8 6.3
 16 0 -1 13.6 5.5
 -16 0 1 10.8 5.4
 -16 0 1 10.8 4.5
 15 0 -1 129.09 10
 -15 0 1 109.59 8
 -15 0 1 117.59 10
 14 0 -1 339.07 13
 -14 0 1 350.86 13.2
 -14 0 1 325.57 11.4
 13 0 -1 432.16 14.2
 -13 0 1 423.26 12.7
 -13 0 1 437.36 14.4
 12 0 -1 550.64 16
 -12 0 1 545.85 16.2
 -12 0 1 539.95 14.7
 11 0 -1 186.58 8.2
 -11 0 1 201.98 8.5
 -11 0 1 194.18 7.2
 10 0 -1 64.09 5.4
 10 0 -1 61.39 5.3
 -10 0 1 60.29 4.6
 -10 0 1 72.09 5.6
 9 0 -1 4.7 2.4
 9 0 -1 3.7 2.3
 -9 0 1 6.4 2.4
 -9 0 1 5 2.2
 8 0 -1 62.69 4.4
 8 0 -1 65.79 4.4
 -8 0 1 62.69 3.8
 -8 0 1 62.89 4.6
 7 0 -1 99.99 4.6
 7 0 -1 100.99 4.6
 -7 0 1 98.69 4.6
 -7 0 1 99.89 4
 6 0 -1 20.9 2.9
 6 0 -1 21.7 2.9
 -6 0 1 19.7 2.9
 -6 0 1 16.6 2.4
 5 0 -1 2730.63 60.09
 5 0 -1 2615.94 59.99
 -5 0 1 2707.43 60.19
 -5 0 1 2731.73 59.69
 4 0 -1 2078.99 47.1
 4 0 -1 2143.89 47.1
 -4 0 1 2103.39 47.2
 -4 0 1 2120.49 46.9
 3 0 -1 5772.72 126.79
 3 0 -1 5716.33 126.69
 -3 0 1 5762.72 126.29
 -3 0 1 5703.03 126.49
 2 0 -1 64.19 2.2
 2 0 -1 64.79 2.2
 -2 0 1 64.49 2
 -2 0 1 63.79 2.2
 1 0 -1 56.09 1.5
 1 0 -1 58.89 1.6
 -1 0 1 60.69 1.6
 -1 0 1 52.39 1.6
 -1 0 -1 491.05 10.8
 -1 0 -1 480.05 10.9
 -1 0 -1 491.15 10.7
 1 0 1 504.75 10.9
 1 0 1 478.85 10.8
 1 0 1 456.95 10.7
 -2 0 -1 291.37 6.8
 -2 0 -1 290.77 6.9
 -2 0 -1 294.77 6.7
 2 0 1 292.97 6.8
 2 0 1 285.47 6.9
 -3 0 -1 6125.79 132.69
 -3 0 -1 6052.69 132.89
 3 0 1 5883.71 133.19
 -4 0 -1 510.45 12.4
 -4 0 -1 520.95 12
 4 0 1 513.25 12.3
 -5 0 -1 1291.97 29.2
 -5 0 -1 1301.77 28.7
 5 0 1 1232.58 29
 -6 0 -1 70.99 3.8
 -6 0 -1 73.69 3.2
 -7 0 -1 408.26 10.9
 -7 0 -1 409.06 10.2
 7 0 1 397.16 10.7
 -8 0 -1 0.3 2.1
 -8 0 -1 -1.2 1.7
 8 0 1 2.7 2
 -9 0 -1 99.79 4.7
 -9 0 -1 102.79 5.6
 9 0 1 106.19 5.5
 -10 0 -1 45.1 4.2
 -10 0 -1 40.4 5.2
 10 0 1 41.8 5
 -11 0 -1 458.55 13.5
 -11 0 -1 436.56 12.3
 11 0 1 453.45 13.4
 -12 0 -1 177.48 8.8
 -12 0 -1 172.78 7.4
 12 0 1 186.38 8.6
 12 0 1 186.58 8.7
 -13 0 -1 664.43 19
 -13 0 -1 655.23 17.4
 13 0 1 643.04 18.7
 13 0 1 668.63 18.7
 -14 0 -1 190.38 10.4
 -14 0 -1 189.88 8.6
 14 0 1 195.68 10
 14 0 1 197.38 10.1
 -15 0 -1 144.59 10.3
 -15 0 -1 138.39 8.2
 15 0 1 146.99 10
 -16 0 -1 6.3 4.3
 -16 0 -1 8.3 5.2
 16 0 1 2.8 5.1
 -17 0 -1 12.2 4.7
 -17 0 -1 2.4 5.5
 17 0 1 5.8 5.7
 17 -1 -1 -0.2 5.7
 -17 1 1 3.1 5.9
 -17 1 1 6.6 4.8
 16 -1 -1 4.4 5.2
 -16 1 1 7.2 5.3
 -16 1 1 8.2 4.4
 15 -1 -1 27.7 5.3
 -15 1 1 32.9 4.7
 -15 1 1 25.1 5.4
 14 -1 -1 235.68 11.3
 -14 1 1 233.48 11.3
 -14 1 1 227.58 9.5
 13 -1 -1 486.85 15.3
 -13 1 1 500.15 15.7
 -13 1 1 471.25 14
 12 -1 -1 672.63 18.9
 -12 1 1 695.73 17.9
 -12 1 1 690.63 19.2
 11 -1 -1 231.88 9
 11 -1 -1 208.88 8.6
 -11 1 1 225.78 9.2
 -11 1 1 207.88 7.8
 10 -1 -1 121.79 6.5
 10 -1 -1 135.29 6.6
 -10 1 1 121.09 5.7
 -10 1 1 121.99 6.6
 9 -1 -1 127.89 6.1
 9 -1 -1 118.29 6
 -9 1 1 124.39 5.3
 -9 1 1 123.29 6.1
 8 -1 -1 256.97 8.2
 8 -1 -1 267.27 8.3
 -8 1 1 261.47 7.6
 -8 1 1 266.07 8.4
 7 -1 -1 186.18 6.2
 -7 1 1 177.08 6.3
 -7 1 1 167.28 5.6
 6 -1 -1 1367.56 30.9
 -6 1 1 1348.77 30.5
 -6 1 1 1321.47 31
 5 -1 -1 807.62 19
 -5 1 1 812.02 19.1
 -5 1 1 819.12 18.7
 4 -1 -1 2570.84 55.99
 -4 1 1 2484.95 55.69
 -4 1 1 2502.25 56.09
 -3 1 1 1597.64 35.7
 2 -1 -1 2457.85 53.09
 -2 1 1 2381.96 52.99
 -2 1 1 2381.66 53.09
 1 -1 -1 257.97 5.9
 1 -1 -1 252.37 6
 1 -1 -1 253.77 5.9
 -1 1 1 253.17 5.9
 -1 1 1 251.67 5.8
 0 -1 -1 64.29 1.7
 0 -1 -1 59.59 1.6
 0 1 1 69.09 1.6
 0 1 1 69.89 1.8
 0 1 1 72.39 1.6
 0 1 1 70.09 1.6
 -1 -1 -1 2.5 0.3
 -1 -1 -1 3.4 0.5
 -1 -1 -1 4.7 0.7
 -1 -1 -1 2.9 0.5
 -1 -1 -1 3.4 0.6
 -1 -1 -1 3.6 0.6
 1 1 1 4.1 0.4
 1 1 1 4 0.7
 1 1 1 4.5 0.6
 1 1 1 3.1 0.6
 1 1 1 3 0.6
 1 1 1 2.8 0.6
 -2 -1 -1 1767.42 38.7
 -2 -1 -1 1758.22 38.9
 2 1 1 1746.43 38.9
 2 1 1 1777.02 38.7
 -3 -1 -1 20 1.9
 -3 -1 -1 18.3 1.4
 3 1 1 19.2 1.8
 -4 -1 -1 2424.26 52.69
 -4 -1 -1 2386.26 52.99
 4 1 1 2349.26 52.89
 -5 -1 -1 1569.04 35.3
 -5 -1 -1 1579.64 34.9
 5 1 1 1536.15 35.2
 -6 -1 -1 1010.6 23.6
 -6 -1 -1 1025.7 23.1
 6 1 1 1002.2 23.5
 -7 -1 -1 473.65 11.6
 -7 -1 -1 475.65 12.3
 7 1 1 472.65 12.2
 -8 -1 -1 14 1.9
 -8 -1 -1 13.3 2.3
 8 1 1 10.9 2.2
 -9 -1 -1 82.69 5.4
 -9 -1 -1 98.49 4.4
 9 1 1 83.79 5.2
 -10 -1 -1 240.58 7.7
 -10 -1 -1 247.28 8.7
 10 1 1 236.28 8.5
 -11 -1 -1 55.29 4.8
 -11 -1 -1 66.09 6
 11 1 1 67.69 5.9
 11 1 1 60.49 5.9
 -12 -1 -1 527.45 14.3
 -12 -1 -1 548.15 15.7
 12 1 1 542.25 15.5
 12 1 1 515.35 15.5
 -13 -1 -1 212.78 8.2
 -13 -1 -1 209.28 10
 13 1 1 205.28 9.5
 13 1 1 202.28 9.6
 -14 -1 -1 354.36 13.3
 -14 -1 -1 345.27 11.3
 14 1 1 342.67 13
 -15 -1 -1 171.28 10.7
 -15 -1 -1 173.98 8.7
 15 1 1 172.78 10.5
 -16 -1 -1 40 5.9
 -16 -1 -1 36.4 4.9
 16 1 1 32.6 5.9
 -17 -1 -1 0.8 5.4
 -17 -1 -1 7.2 4.6
 17 1 1 7.4 5.7
 17 -2 -1 77.29 11.3
 -17 2 1 89.29 11.6
 -17 2 1 93.39 9.1
 16 -2 -1 26.8 5.8
 -16 2 1 32.7 6.1
 -16 2 1 42.1 5.4
 15 -2 -1 4.4 4.7
 15 -2 -1 2.6 5
 -15 2 1 6.8 4.1
 -15 2 1 4.3 4.8
 14 -2 -1 81.69 7.8
 14 -2 -1 95.39 8.9
 -14 2 1 102.39 9
 -14 2 1 84.99 7.3
 13 -2 -1 218.38 9.9
 13 -2 -1 242.98 10.4
 -13 2 1 227.38 10.6
 -13 2 1 212.28 9.1
 12 -2 -1 828.52 21.8
 12 -2 -1 819.42 21.8
 -12 2 1 815.92 22
 -12 2 1 812.32 20.7
 11 -2 -1 196.18 8.6
 11 -2 -1 206.98 8.6
 -11 2 1 212.68 9
 -11 2 1 204.58 7.7
 10 -2 -1 772.62 20
 10 -2 -1 797.02 20.2
 -10 2 1 774.02 20.3
 -10 2 1 782.52 19.3
 9 -2 -1 152.78 6.8
 9 -2 -1 156.78 6.7
 -9 2 1 164.28 6
 -9 2 1 159.98 7
 8 -2 -1 12.9 2.5
 -8 2 1 16.7 2.3
 -8 2 1 17.5 2.6
 7 -2 -1 65.99 4.2
 7 -2 -1 58.99 3.6
 -7 2 1 65.49 4.4
 -7 2 1 70.69 3.6
 6 -2 -1 181.88 5.5
 6 -2 -1 171.28 5.8
 -6 2 1 167.68 5.3
 -6 2 1 175.88 5.9
 5 -2 -1 675.33 15.8
 5 -2 -1 673.33 16
 -5 2 1 668.33 16.1
 -5 2 1 658.23 15.6
 4 -2 -1 3227.38 70.99
 4 -2 -1 3236.48 70.89
 -4 2 1 3190.68 70.79
 -4 2 1 3165.48 71.09
 3 -2 -1 444.66 10.7
 3 -2 -1 434.66 10.3
 3 -2 -1 445.76 10.5
 -3 2 1 428.56 10.3
 -3 2 1 441.86 10.6
 2 -2 -1 1375.36 30.2
 2 -2 -1 1356.06 30.5
 2 -2 -1 1372.16 30.3
 -2 2 1 1349.86 30.4
 -2 2 1 1369.56 30.3
 -2 2 1 1349.66 30.2
 1 -2 -1 91.19 2.3
 1 -2 -1 89.39 2.6
 1 -2 -1 86.59 2.5
 1 -2 -1 88.89 2.7
 1 -2 -1 88.19 2.4
 -1 2 1 89.29 2.5
 -1 2 1 84.39 2.4
 -1 2 1 90.39 2.4
 -1 2 1 88.29 2.4
 0 -2 -1 24.8 1.3
 0 -2 -1 25.1 1.4
 0 -2 -1 23.5 1.2
 0 -2 -1 24.3 1.3
 0 -2 -1 26 1.3
 0 2 1 26.3 1
 -1 -2 -1 1404.26 29.7
 -1 -2 -1 1364.76 29.7
 -1 -2 -1 1297.77 29.7
 -1 -2 -1 1307.47 29.7
 1 2 1 1330.27 29.4
 -2 -2 -1 79.19 2.7
 -2 -2 -1 81.99 2.6
 -2 -2 -1 82.59 2.4
 -2 -2 -1 78.99 2.6
 -2 -2 -1 81.39 2.1
 -2 -2 -1 79.99 2.6
 2 2 1 81.69 2.4
 2 2 1 82.69 2.2
 2 2 1 77.19 2.3
 -3 -2 -1 70.99 2.2
 -3 -2 -1 71.89 2.5
 3 2 1 67.79 2.5
 -4 -2 -1 694.33 15.9
 -4 -2 -1 678.73 15.5
 4 2 1 686.13 15.8
 -5 -2 -1 995.2 22.3
 -5 -2 -1 985.6 22.7
 5 2 1 977.1 22.6
 -6 -2 -1 264.27 7.4
 -6 -2 -1 264.97 6.8
 6 2 1 259.77 7.3
 -7 -2 -1 599.14 14.1
 -7 -2 -1 588.44 14.7
 7 2 1 587.34 14.6
 -8 -2 -1 255.77 7
 -8 -2 -1 251.47 7.8
 8 2 1 242.58 7.8
 -9 -2 -1 4.7 2.3
 -9 -2 -1 4.3 1.9
 9 2 1 4.4 2.3
 -10 -2 -1 12.1 2.8
 -10 -2 -1 15 2.4
 10 2 1 11.5 2.7
 10 2 1 11.3 2.8
 -11 -2 -1 13.3 3.2
 -11 -2 -1 9.8 2.6
 11 2 1 10.2 3.1
 11 2 1 14.9 3.2
 -12 -2 -1 205.68 7.5
 -12 -2 -1 218.28 9.1
 12 2 1 196.68 8.9
 12 2 1 193.48 8.7
 -13 -2 -1 191.78 9.5
 -13 -2 -1 188.58 7.6
 13 2 1 185.18 9.4
 -14 -2 -1 564.44 17.1
 -14 -2 -1 532.45 15.2
 14 2 1 539.55 16.8
 -15 -2 -1 245.28 9.8
 -15 -2 -1 253.77 11.9
 15 2 1 256.57 12
 -16 -2 -1 128.89 10.6
 -16 -2 -1 118.69 8.3
 16 2 1 125.39 10.6
 -17 -2 -1 18.4 6.8
 -17 -2 -1 17 4.8
 17 2 1 22.8 6
 17 -3 -1 43.1 6.8
 -17 3 1 48.8 7.2
 -17 3 1 48.9 6.1
 16 -3 -1 84.19 10.6
 -16 3 1 82.29 8.7
 -16 3 1 84.39 10.8
 15 -3 -1 22.4 5.4
 -15 3 1 22.2 5.4
 -15 3 1 21.8 4.6
 14 -3 -1 4.7 4.4
 14 -3 -1 2.2 3.7
 -14 3 1 0.8 4.3
 -14 3 1 2.9 3.9
 13 -3 -1 196.98 9.8
 13 -3 -1 187.18 9.2
 -13 3 1 184.38 9.9
 -13 3 1 186.88 8.6
 12 -3 -1 216.88 9.6
 12 -3 -1 220.08 9.3
 12 -3 -1 218.48 9.6
 -12 3 1 217.88 8.6
 -12 3 1 218.88 9.9
 11 -3 -1 537.25 15.1
 11 -3 -1 535.55 15.2
 11 -3 -1 518.45 15.2
 -11 3 1 506.25 14.2
 -11 3 1 525.95 15.5
 10 -3 -1 629.34 16.6
 10 -3 -1 607.34 16.6
 10 -3 -1 613.04 16.6
 -10 3 1 619.14 16.9
 -10 3 1 608.04 15.8
 9 -3 -1 288.47 9.4
 9 -3 -1 300.17 9.4
 -9 3 1 292.27 9.7
 -9 3 1 289.87 8.8
 8 -3 -1 374.46 10.7
 8 -3 -1 358.86 10
 8 -3 -1 372.26 10.6
 -8 3 1 374.36 10.9
 -8 3 1 366.76 10
 7 -3 -1 184.98 5.8
 7 -3 -1 177.18 6.3
 7 -3 -1 181.68 6.3
 -7 3 1 183.78 6.6
 -7 3 1 180.18 5.9
 6 -3 -1 0.1 1.5
 6 -3 -1 -0.6 1.6
 6 -3 -1 0.9 1.2
 -6 3 1 0.6 1.5
 -6 3 1 -1.2 1.6
 5 -3 -1 343.17 9.1
 5 -3 -1 354.96 8.9
 5 -3 -1 354.16 9.3
 -5 3 1 343.77 8.8
 -5 3 1 341.97 9.3
 4 -3 -1 310.27 8.2
 4 -3 -1 312.67 8
 4 -3 -1 318.17 7.9
 -4 3 1 309.67 8.2
 -4 3 1 313.47 7.8
 3 -3 -1 188.38 5.4
 3 -3 -1 198.78 5.1
 3 -3 -1 187.08 5.2
 -3 3 1 201.38 5.2
 -3 3 1 191.78 5.1
 -3 3 1 187.58 5.4
 2 -3 -1 767.92 17.5
 2 -3 -1 768.12 17.2
 2 -3 -1 758.82 17.6
 2 -3 -1 758.52 17.4
 2 -3 -1 755.82 17.2
 -2 3 1 747.13 17.3
 -2 3 1 756.22 17.2
 1 -3 -1 2944.61 63.89
 1 -3 -1 2904.21 63.79
 1 -3 -1 2877.01 64.09
 1 -3 -1 2939.31 64.29
 1 -3 -1 2848.22 64.09
 1 -3 -1 2844.12 63.79
 -1 3 1 2799.82 63.79
 -1 3 1 2942.11 63.79
 -1 3 1 2944.01 63.89
 -1 3 1 2998.4 63.99
 0 -3 -1 7254.37 158.08
 0 -3 -1 7277.67 158.08
 0 -3 -1 7060.29 158.38
 0 -3 -1 6853.21 158.88
 0 -3 -1 7172.98 159.08
 0 3 1 7335.87 157.28
 -1 -3 -1 13.9 1.6
 -1 -3 -1 13.3 1.5
 -1 -3 -1 14.2 1.6
 -1 -3 -1 13.7 1.6
 -2 -3 -1 362.86 8.9
 -2 -3 -1 367.56 9
 -2 -3 -1 376.26 9
 -2 -3 -1 376.86 8.5
 -2 -3 -1 358.16 9
 -2 -3 -1 365.16 8.5
 2 3 1 385.56 8.6
 2 3 1 373.26 8.6
 2 3 1 386.76 8.6
 2 3 1 397.56 8.6
 -3 -3 -1 64.29 2.7
 -3 -3 -1 64.99 2.4
 -3 -3 -1 65.89 2.1
 -3 -3 -1 64.29 2.7
 -3 -3 -1 61.39 2.8
 3 3 1 62.59 2.4
 -4 -3 -1 1102.19 24.9
 -4 -3 -1 1079.99 24.3
 -4 -3 -1 1090.49 24.6
 4 3 1 1075.39 24.6
 -5 -3 -1 1414.36 32
 -5 -3 -1 1415.16 31.6
 5 3 1 1417.76 32
 -6 -3 -1 393.06 10.2
 -6 -3 -1 400.16 9.6
 6 3 1 399.36 10.2
 -7 -3 -1 1856.01 41.8
 -7 -3 -1 1868.91 42.4
 7 3 1 1874.61 42.3
 -8 -3 -1 201.88 6.8
 -8 -3 -1 207.08 6.1
 8 3 1 197.58 6.8
 8 3 1 211.58 6.9
 -9 -3 -1 24 3.2
 -9 -3 -1 26.5 4.1
 9 3 1 18.5 2.7
 9 3 1 22.6 4.1
 -10 -3 -1 7.6 2.2
 -10 -3 -1 8.5 2.6
 10 3 1 5.4 2.6
 10 3 1 8.4 2.7
 -11 -3 -1 36.1 4.3
 -11 -3 -1 33.4 5.4
 11 3 1 30 5.2
 11 3 1 42.8 5.5
 -12 -3 -1 189.18 8.6
 -12 -3 -1 181.88 7.1
 12 3 1 179.18 8.4
 -13 -3 -1 38.5 5.2
 -13 -3 -1 38.3 6.7
 13 3 1 26.2 4.3
 -14 -3 -1 130.79 8.9
 -14 -3 -1 134.79 7.3
 14 3 1 135.59 9
 -15 -3 -1 146.59 10.1
 -15 -3 -1 132.59 7.8
 15 3 1 148.49 10.2
 -16 -3 -1 68.29 7.5
 -16 -3 -1 69.19 10
 16 3 1 70.89 9.7
 -17 -3 -1 98.69 8.4
 -17 -3 -1 87.29 10.7
 17 3 1 97.49 11.1
 16 -4 -1 119.69 10.9
 -16 4 1 114.49 9.2
 -16 4 1 114.69 11.6
 15 -4 -1 7.8 5
 -15 4 1 17.5 4.6
 -15 4 1 19.9 5.5
 14 -4 -1 -0.2 4.3
 14 -4 -1 2.1 3.7
 -14 4 1 -0.4 3.8
 -14 4 1 2.1 4.7
 13 -4 -1 58.49 7.6
 13 -4 -1 59.89 6.8
 13 -4 -1 69.09 7.9
 -13 4 1 52.49 8.1
 -13 4 1 52.89 6.6
 12 -4 -1 333.57 12
 12 -4 -1 345.57 11.9
 12 -4 -1 324.47 11.4
 -12 4 1 342.07 12.4
 -12 4 1 338.17 11.1
 11 -4 -1 56.59 6.3
 11 -4 -1 52.39 6.4
 11 -4 -1 59.69 5.9
 -11 4 1 53.29 5.4
 -11 4 1 50.59 6.7
 10 -4 -1 63.89 5.7
 10 -4 -1 57.59 5.7
 10 -4 -1 61.59 5.3
 -10 4 1 62.89 6.2
 -10 4 1 59.99 5
 9 -4 -1 135.19 6.5
 9 -4 -1 135.59 6.3
 -9 4 1 135.99 6.8
 -9 4 1 137.59 5.9
 8 -4 -1 343.27 10
 8 -4 -1 334.27 10
 8 -4 -1 340.97 9.5
 -8 4 1 341.97 10.3
 -8 4 1 337.57 9.5
 7 -4 -1 196.48 6.2
 7 -4 -1 195.78 6.7
 7 -4 -1 186.78 6.5
 -7 4 1 190.28 6.2
 -7 4 1 194.28 6.9
 6 -4 -1 626.84 15.7
 6 -4 -1 644.14 15.9
 6 -4 -1 651.13 15.5
 -6 4 1 644.04 15.5
 -6 4 1 640.24 16
 5 -4 -1 83.09 3.9
 5 -4 -1 84.69 3.5
 5 -4 -1 79.79 3.8
 -5 4 1 80.19 4
 -5 4 1 81.39 3.5
 4 -4 -1 47.6 2.9
 4 -4 -1 47.7 2.9
 4 -4 -1 46.8 2.5
 -4 4 1 39.1 2.6
 -4 4 1 43.5 2.7
 -4 4 1 44.1 3
 3 -4 -1 620.34 14.7
 3 -4 -1 631.94 14.6
 3 -4 -1 654.13 15.1
 3 -4 -1 620.24 15.1
 -3 4 1 632.54 14.9
 -3 4 1 637.54 14.7
 2 -4 -1 2253.67 50.39
 2 -4 -1 2289.07 50.79
 2 -4 -1 2258.77 50.19
 2 -4 -1 2225.68 50.69
 2 -4 -1 2202.18 50.59
 2 -4 -1 2332.17 50.59
 -2 4 1 2291.87 50.49
 -2 4 1 2355.16 50.59
 -2 4 1 2288.77 50.39
 1 -4 -1 52.49 2.1
 1 -4 -1 52.89 2
 1 -4 -1 53.79 2.1
 1 -4 -1 55.09 2.5
 1 -4 -1 53.39 2.7
 1 -4 -1 49.99 2.5
 -1 4 1 58.29 2.1
 -1 4 1 55.49 2.2
 -1 4 1 53.49 2.1
 -1 4 1 57.19 2.2
 0 -4 -1 28.9 1.9
 0 -4 -1 27.8 2.1
 0 -4 -1 27.8 2.1
 0 -4 -1 29.1 1.8
 0 -4 -1 27.8 2.3
 0 4 1 30.6 1.3
 0 4 1 31.8 1.4
 0 4 1 31.9 1.4
 -1 -4 -1 1487.85 33.5
 -1 -4 -1 1517.85 33.4
 -1 -4 -1 1451.45 33.6
 -1 -4 -1 1537.65 33.4
 -2 -4 -1 1150.98 25.2
 -2 -4 -1 1081.29 25.2
 -2 -4 -1 1088.69 25.3
 -2 -4 -1 1135.59 25.3
 2 4 1 1126.79 24.8
 2 4 1 1122.79 24.8
 -3 -4 -1 349.37 8.3
 -3 -4 -1 365.46 8.9
 -3 -4 -1 355.56 8.9
 -3 -4 -1 347.87 8.9
 -3 -4 -1 357.26 8.4
 3 4 1 355.56 8.4
 -4 -4 -1 334.17 7.9
 -4 -4 -1 327.37 8.6
 -4 -4 -1 330.77 8.1
 -4 -4 -1 329.07 8.6
 -4 -4 -1 329.07 8.5
 4 4 1 322.97 8.1
 4 4 1 333.27 8.1
 -5 -4 -1 36.6 2
 -5 -4 -1 32.4 2.4
 -5 -4 -1 36.2 3
 5 4 1 27.3 2.5
 5 4 1 28.6 2.5
 -6 -4 -1 817.82 18.9
 -6 -4 -1 806.82 19.3
 -6 -4 -1 810.02 18.4
 6 4 1 788.72 18.8
 6 4 1 790.52 18.9
 -7 -4 -1 414.46 11.2
 -7 -4 -1 422.16 10.8
 -7 -4 -1 408.76 10.2
 7 4 1 419.56 10.8
 7 4 1 401.56 10.8
 -8 -4 -1 252.37 7
 -8 -4 -1 251.67 7.7
 8 4 1 247.88 7.7
 8 4 1 251.37 7.7
 -9 -4 -1 212.48 6.5
 -9 -4 -1 218.08 7.4
 9 4 1 223.38 7.4
 9 4 1 222.18 7.5
 -10 -4 -1 88.09 5.6
 -10 -4 -1 84.69 4.5
 10 4 1 81.59 5.6
 -11 -4 -1 5.3 2.4
 -11 -4 -1 -0.4 2.8
 11 4 1 2 3
 -12 -4 -1 -0.6 2.5
 -12 -4 -1 0 3.1
 12 4 1 -1.6 3.1
 -13 -4 -1 103.49 6.1
 -13 -4 -1 106.59 7.8
 13 4 1 102.69 7.8
 -14 -4 -1 64.49 6.1
 -14 -4 -1 53.99 8
 -14 -4 -1 52.69 7.8
 14 4 1 52.09 7.8
 -15 -4 -1 130.59 9.8
 -15 -4 -1 147.19 13.1
 -15 -4 -1 139.39 7.8
 15 4 1 135.29 10
 -16 -4 -1 211.28 9.6
 -16 -4 -1 219.38 11.9
 16 4 1 207.78 12
 -17 -4 -1 112.79 8.7
 -17 -4 -1 105.49 10.9
 17 4 1 110.39 11.2
 16 -5 -1 126.19 11.3
 -16 5 1 135.99 9.8
 -16 5 1 133.69 12.1
 15 -5 -1 64.49 9.5
 -15 5 1 57.49 10.3
 -15 5 1 66.39 8.2
 14 -5 -1 0.9 4.5
 -14 5 1 -2.6 4.6
 -14 5 1 2.5 4
 13 -5 -1 24.9 4.6
 13 -5 -1 21.9 4.1
 13 -5 -1 17.1 4.4
 -13 5 1 23.2 4.2
 -13 5 1 22.6 4.8
 12 -5 -1 -0.1 3.2
 12 -5 -1 1.7 3.7
 12 -5 -1 -0.7 3.6
 -12 5 1 1.2 3.3
 -12 5 1 -2.2 3.8
 11 -5 -1 172.48 8.5
 11 -5 -1 163.58 8.4
 11 -5 -1 167.38 7.9
 -11 5 1 182.58 7.5
 -11 5 1 168.88 8.8
 10 -5 -1 14.4 3
 10 -5 -1 14.6 3.3
 -10 5 1 15.3 3.4
 -10 5 1 11.6 2.8
 9 -5 -1 561.34 15
 9 -5 -1 548.25 14.9
 -9 5 1 539.65 14.4
 -9 5 1 552.34 15.3
 8 -5 -1 267.17 8.7
 8 -5 -1 282.77 8.8
 8 -5 -1 270.87 8.2
 -8 5 1 268.97 8.3
 -8 5 1 279.47 9.2
 7 -5 -1 699.63 17.5
 7 -5 -1 702.83 17
 7 -5 -1 714.93 17.5
 -7 5 1 688.33 17
 -7 5 1 693.23 17.7
 6 -5 -1 172.68 5.5
 6 -5 -1 172.08 6
 6 -5 -1 179.18 6.1
 -6 5 1 172.98 5.7
 -6 5 1 169.98 6.2
 5 -5 -1 2.7 1.6
 5 -5 -1 2.6 1.6
 5 -5 -1 1.8 1.2
 -5 5 1 2.8 1.7
 -5 5 1 4.2 1.6
 4 -5 -1 84.79 3.2
 4 -5 -1 81.19 3.6
 4 -5 -1 85.79 3.8
 4 -5 -1 86.49 4
 -4 5 1 75.99 3.8
 -4 5 1 80.29 3.4
 3 -5 -1 138.89 4.7
 3 -5 -1 137.49 4.5
 3 -5 -1 135.69 4.7
 3 -5 -1 135.79 4
 3 -5 -1 132.99 4.3
 -3 5 1 134.59 4.5
 -3 5 1 137.89 4.2
 2 -5 -1 10.6 1.5
 2 -5 -1 12.6 1.6
 2 -5 -1 10.5 2.2
 2 -5 -1 13.1 1.9
 2 -5 -1 9.5 1.8
 2 -5 -1 11.5 2.3
 -2 5 1 11.2 1.9
 -2 5 1 11 1.9
 -2 5 1 9.7 1.2
 1 -5 -1 2047.2 46.2
 1 -5 -1 2065.19 45.7
 1 -5 -1 2033.7 46.1
 1 -5 -1 2059.09 45.8
 1 -5 -1 1991.5 45.6
 1 -5 -1 2041.7 46.4
 -1 5 1 2138.69 45.7
 -1 5 1 2069.59 45.7
 -1 5 1 2136.79 45.8
 0 -5 -1 982.2 23.2
 0 -5 -1 1043.7 22.8
 0 -5 -1 975 22.6
 0 -5 -1 984.2 22.9
 0 -5 -1 976.2 23
 0 5 1 1017.8 22.3
 0 5 1 1030.6 22.4
 0 5 1 999.1 22.3
 -1 -5 -1 976 22.5
 -1 -5 -1 947.81 22.5
 -1 -5 -1 1007.9 22.3
 -1 -5 -1 1002 22.3
 1 5 1 974.4 22
 -2 -5 -1 53.79 2.8
 -2 -5 -1 51.59 2.8
 -2 -5 -1 56.59 2.9
 -2 -5 -1 52.99 2.7
 2 5 1 60.09 1.9
 2 5 1 53.89 1.9
 -3 -5 -1 749.73 16.5
 -3 -5 -1 716.43 17.2
 -3 -5 -1 717.73 17
 -3 -5 -1 733.53 17.2
 3 5 1 730.03 16.6
 3 5 1 722.03 16.5
 -4 -5 -1 96.29 3.1
 -4 -5 -1 100.79 4.1
 -4 -5 -1 92.49 3.8
 -4 -5 -1 97.09 3.2
 -4 -5 -1 90.79 3.9
 4 5 1 94.89 3.3
 -5 -5 -1 110.59 4.5
 -5 -5 -1 112.49 3.5
 -5 -5 -1 110.79 4.5
 -5 -5 -1 109.79 4.6
 -5 -5 -1 113.29 3.8
 5 5 1 112.49 3.9
 -6 -5 -1 1314.27 29.7
 -6 -5 -1 1351.06 30.1
 -6 -5 -1 1293.47 30.4
 -6 -5 -1 1329.57 30.7
 6 5 1 1306.47 30.1
 -7 -5 -1 256.97 7.5
 -7 -5 -1 262.97 8.2
 -7 -5 -1 264.97 7
 7 5 1 255.87 7.6
 -8 -5 -1 229.28 6.5
 -8 -5 -1 229.68 7.9
 -8 -5 -1 228.98 7.3
 8 5 1 229.78 7.3
 -9 -5 -1 80.69 5.7
 -9 -5 -1 84.39 4
 -9 -5 -1 77.59 4.8
 9 5 1 73.19 5
 -10 -5 -1 229.78 8.7
 -10 -5 -1 218.78 7
 -10 -5 -1 220.78 8
 10 5 1 224.68 8.2
 -11 -5 -1 291.67 8.7
 -11 -5 -1 295.97 9.9
 -11 -5 -1 296.07 10.6
 11 5 1 284.27 10
 -12 -5 -1 -2.5 3.1
 -12 -5 -1 -0.7 2.5
 -12 -5 -1 -1.1 3.6
 12 5 1 0.7 3.2
 -13 -5 -1 15.2 4.4
 -13 -5 -1 12.6 3.8
 -13 -5 -1 16.7 3.1
 13 5 1 10.3 3.9
 -14 -5 -1 49 8
 -14 -5 -1 54.59 5.9
 14 5 1 46 7.9
 -15 -5 -1 88.79 9.4
 -15 -5 -1 88.79 7
 15 5 1 87.69 9.2
 -16 -5 -1 37.3 4.7
 -16 -5 -1 31 6.1
 16 5 1 34.3 5.9
 -17 -5 -1 130.09 12.4
 -17 -5 -1 143.59 9.4
 -17 -5 -1 127.69 11.8
 17 5 1 139.29 11.7
 16 -6 -1 87.79 11
 -16 6 1 93.99 9.4
 -16 6 1 90.29 11.6
 15 -6 -1 214.38 12.2
 -15 6 1 214.78 12.9
 -15 6 1 214.08 10.4
 14 -6 -1 141.49 10.3
 -14 6 1 154.48 8.7
 -14 6 1 137.79 10.7
 13 -6 -1 -2.9 3.9
 13 -6 -1 1.1 3.5
 13 -6 -1 -2 4
 -13 6 1 -3.1 3.7
 -13 6 1 -0.2 4.3
 12 -6 -1 -3.2 3.6
 12 -6 -1 1.7 3.3
 12 -6 -1 3.9 3.9
 -12 6 1 -2.3 3.8
 -12 6 1 1.7 3.4
 11 -6 -1 32.2 4.3
 11 -6 -1 36 5.8
 11 -6 -1 26.3 4.1
 -11 6 1 43.4 6.9
 -11 6 1 36 5.5
 10 -6 -1 6.5 2.9
 10 -6 -1 3.1 3.1
 -10 6 1 5.8 2.8
 -10 6 1 -1.4 3.2
 9 -6 -1 231.38 8.5
 9 -6 -1 234.08 8.3
 -9 6 1 220.18 8.7
 -9 6 1 229.78 7.8
 8 -6 -1 288.07 9.2
 8 -6 -1 287.17 8.6
 8 -6 -1 293.77 9.3
 -8 6 1 297.17 8.8
 -8 6 1 289.27 9.6
 7 -6 -1 908.21 21.7
 7 -6 -1 926.41 22.1
 7 -6 -1 922.71 22.3
 -7 6 1 913.81 22.4
 -7 6 1 892.91 21.7
 6 -6 -1 853.11 20.4
 6 -6 -1 863.21 20.1
 6 -6 -1 846.82 20.7
 -6 6 1 834.62 20.7
 -6 6 1 851.31 20.2
 5 -6 -1 144.89 5.4
 5 -6 -1 137.69 4.7
 5 -6 -1 137.49 5.1
 5 -6 -1 151.48 5.6
 -5 6 1 141.99 5.4
 -5 6 1 140.29 5
 4 -6 -1 98.29 3.6
 4 -6 -1 107.09 4.1
 4 -6 -1 102.89 4.6
 4 -6 -1 110.79 4.5
 -4 6 1 101.69 4.3
 -4 6 1 93.89 3.9
 3 -6 -1 52.39 3.6
 3 -6 -1 48 2.9
 3 -6 -1 55.89 2.4
 3 -6 -1 58.39 3.1
 3 -6 -1 55.19 3.5
 3 -6 -1 51.09 3.1
 -3 6 1 57.09 3.1
 -3 6 1 56.49 2.9
 -3 6 1 51.09 3.2
 2 -6 -1 731.33 16.6
 2 -6 -1 705.83 17.1
 2 -6 -1 695.53 16.9
 2 -6 -1 693.83 16.4
 2 -6 -1 716.73 16.4
 2 -6 -1 696.93 17.2
 -2 6 1 744.83 16.7
 -2 6 1 710.43 16.6
 -2 6 1 712.43 16.5
 1 -6 -1 80.49 2.8
 1 -6 -1 83.49 3.8
 1 -6 -1 75.39 3.6
 1 -6 -1 81.19 3.6
 1 -6 -1 83.99 3
 1 -6 -1 78.59 2.7
 -1 6 1 82.59 2.9
 -1 6 1 84.29 2.9
 0 -6 -1 28.8 2.4
 0 -6 -1 28.3 2.6
 0 -6 -1 29.4 2.6
 0 -6 -1 27.6 2.3
 0 6 1 31.6 1.8
 0 6 1 30.3 1.7
 0 6 1 30.2 1.6
 -1 -6 -1 880.11 19.7
 -1 -6 -1 859.81 19.7
 -1 -6 -1 838.52 19.9
 -1 -6 -1 831.72 19.9
 1 6 1 849.91 19.2
 -2 -6 -1 30.4 2.8
 -2 -6 -1 31.3 2.7
 -2 -6 -1 30.6 2.6
 -2 -6 -1 29.5 2.8
 2 6 1 36.1 1.7
 2 6 1 33.2 1.7
 -3 -6 -1 1099.29 25.1
 -3 -6 -1 1065.29 25.1
 -3 -6 -1 1108.09 24.9
 3 6 1 1062.49 24.2
 3 6 1 1071.29 24.2
 -4 -6 -1 319.67 8.7
 -4 -6 -1 309.97 8.5
 -4 -6 -1 318.87 8.8
 -4 -6 -1 323.07 7.8
 4 6 1 315.07 7.9
 -5 -6 -1 13.1 2.1
 -5 -6 -1 12.4 2.2
 -5 -6 -1 16.5 3
 -5 -6 -1 15.8 2.4
 -5 -6 -1 16.7 2.2
 5 6 1 12.9 2.3
 -6 -6 -1 9.7 1.5
 -6 -6 -1 13.5 2.5
 -6 -6 -1 9.4 1.6
 -6 -6 -1 13 2.4
 6 6 1 8.1 1.7
 -7 -6 -1 22.2 3.1
 -7 -6 -1 21.6 2.6
 -7 -6 -1 24 3.8
 -7 -6 -1 28.7 4
 7 6 1 18.5 3.3
 -8 -6 -1 82.49 4.4
 -8 -6 -1 85.99 3.8
 -8 -6 -1 84.29 5.3
 -8 -6 -1 86.99 5.6
 8 6 1 82.39 4.7
 -9 -6 -1 595.64 15.2
 -9 -6 -1 600.74 16.1
 -9 -6 -1 580.34 14.5
 -9 -6 -1 590.04 15.9
 9 6 1 596.34 15.4
 -10 -6 -1 556.54 15.7
 -10 -6 -1 569.44 15
 -10 -6 -1 559.04 14.1
 10 6 1 570.04 15.2
 -11 -6 -1 273.77 9.4
 -11 -6 -1 249.97 10
 -11 -6 -1 265.27 8.3
 11 6 1 275.57 9.6
 -12 -6 -1 13.8 2.8
 -12 -6 -1 14.1 4
 -12 -6 -1 12.1 3.4
 12 6 1 10.2 3.5
 -14 -6 -1 27.4 5.2
 -14 -6 -1 17 5.7
 -14 -6 -1 20 3.6
 14 6 1 21.5 4.6
 -15 -6 -1 33.8 6.5
 -15 -6 -1 52.09 8.9
 -15 -6 -1 40.8 6.5
 15 6 1 38.7 5.6
 -16 -6 -1 114.39 10.8
 -16 -6 -1 107.69 10.9
 -16 -6 -1 96.19 8.3
 16 6 1 99.99 10.3
 -17 -6 -1 78.89 10.8
 -17 -6 -1 72.39 11
 17 6 1 80.19 11
 16 -7 -1 194.58 12.7
 -16 7 1 182.28 13.3
 -16 7 1 175.68 10.9
 15 -7 -1 140.09 11.2
 -15 7 1 143.79 11.8
 -15 7 1 137.99 9.6
 14 -7 -1 114.89 9.9
 -14 7 1 111.09 8.4
 -14 7 1 114.79 10.7
 13 -7 -1 94.49 8.5
 13 -7 -1 100.79 8.9
 -13 7 1 93.59 7.7
 -13 7 1 93.79 9.5
 12 -7 -1 3.1 3.5
 12 -7 -1 0.9 3.9
 12 -7 -1 4.8 4
 -12 7 1 8.1 3.7
 -12 7 1 3.2 4
 11 -7 -1 11.7 3.8
 11 -7 -1 7.9 3.8
 11 -7 -1 15.7 3.5
 -11 7 1 17.2 3.4
 -11 7 1 11.6 3.9
 10 -7 -1 -3.7 3.1
 10 -7 -1 0.4 2.8
 -10 7 1 -1.6 3.2
 -10 7 1 -1 2.8
 9 -7 -1 54.89 5.7
 9 -7 -1 67.29 5.3
 -9 7 1 50.89 5.9
 -9 7 1 62.49 5.2
 8 -7 -1 135.69 5.5
 8 -7 -1 132.79 6.2
 8 -7 -1 121.89 6.2
 -8 7 1 127.39 5.9
 -8 7 1 113.79 6.5
 7 -7 -1 205.98 7.8
 7 -7 -1 201.18 7.2
 7 -7 -1 198.98 6.6
 7 -7 -1 212.38 7.4
 -7 7 1 207.78 6.9
 -7 7 1 195.08 7.5
 6 -7 -1 1207.38 28
 6 -7 -1 1210.98 28.8
 6 -7 -1 1217.98 28.4
 6 -7 -1 1253.67 29
 -6 7 1 1175.98 28.1
 -6 7 1 1207.18 28.7
 5 -7 -1 351.36 10
 5 -7 -1 341.37 9.8
 5 -7 -1 337.77 9.3
 5 -7 -1 341.77 8.9
 -5 7 1 333.27 9.6
 -5 7 1 338.37 9.2
 4 -7 -1 255.37 6.7
 4 -7 -1 285.87 8.2
 4 -7 -1 250.97 7.9
 4 -7 -1 259.17 7.3
 -4 7 1 258.67 7.3
 -4 7 1 266.87 7.7
 3 -7 -1 4.9 1.6
 3 -7 -1 3.6 1.8
 3 -7 -1 3.9 1.8
 3 -7 -1 1.8 1.7
 3 -7 -1 4.7 1.3
 3 -7 -1 1.2 1.4
 -3 7 1 2.7 1.4
 -3 7 1 3.7 1.6
 -3 7 1 2.9 1.5
 2 -7 -1 58.79 3.6
 2 -7 -1 64.29 3.9
 2 -7 -1 63.99 3.8
 2 -7 -1 61.09 2.9
 2 -7 -1 59.09 2.8
 2 -7 -1 61.49 2.8
 -2 7 1 58.49 3
 -2 7 1 66.29 3.1
 -2 7 1 63.99 2.9
 1 -7 -1 192.38 6.2
 1 -7 -1 207.28 6
 1 -7 -1 204.98 6.7
 1 -7 -1 200.58 5.7
 1 -7 -1 210.48 5.5
 1 -7 -1 202.78 5.3
 1 -7 -1 208.48 6.5
 -1 7 1 210.28 5.6
 -1 7 1 211.98 5.6
 0 -7 -1 1089.89 25
 0 -7 -1 1141.59 25.2
 0 -7 -1 1094.09 25.6
 0 -7 -1 1086.19 25.4
 0 -7 -1 998.9 24.7
 0 7 1 1096.19 24.6
 0 7 1 1148.49 24.8
 0 7 1 1117.09 24.6
 -1 -7 -1 93.79 4
 -1 -7 -1 95.79 3.8
 -1 -7 -1 89.09 3.9
 -1 -7 -1 108.69 4.2
 1 7 1 92.29 3
 1 7 1 98.29 3
 -2 -7 -1 450.95 11.7
 -2 -7 -1 472.75 11.5
 -2 -7 -1 459.55 11.4
 -2 -7 -1 455.25 11.7
 2 7 1 458.15 10.8
 2 7 1 459.55 10.9
 -3 -7 -1 281.47 8.2
 -3 -7 -1 293.17 8
 -3 -7 -1 292.67 8.2
 3 7 1 281.67 7.1
 3 7 1 288.37 7.1
 -4 -7 -1 575.44 13.6
 -4 -7 -1 523.85 14.5
 -4 -7 -1 626.04 14.8
 -4 -7 -1 601.64 14.4
 4 7 1 591.74 13.7
 -6 -7 -1 97.39 5.1
 -6 -7 -1 101.69 5
 -6 -7 -1 95.49 3.9
 -6 -7 -1 102.79 4
 -6 -7 -1 103.49 5.3
 6 7 1 101.49 4.2
 -7 -7 -1 124.89 5.9
 -7 -7 -1 109.59 5.7
 -7 -7 -1 114.39 4.6
 -7 -7 -1 122.29 4.4
 7 7 1 108.49 4.8
 -8 -7 -1 36.9 3.7
 -8 -7 -1 47.4 5.4
 -8 -7 -1 35 4.8
 -8 -7 -1 41.6 3.4
 8 7 1 35.2 4
 -9 -7 -1 8.6 2.3
 -9 -7 -1 10.1 3.3
 -9 -7 -1 10.7 3.5
 -9 -7 -1 9.7 2.1
 9 7 1 9.7 2.4
 -10 -7 -1 796.22 20.8
 -10 -7 -1 795.82 20
 -10 -7 -1 812.12 19.3
 -10 -7 -1 788.92 21
 10 7 1 803.22 20.2
 -11 -7 -1 490.25 14.9
 -11 -7 -1 479.35 13
 -11 -7 -1 505.15 15.2
 11 7 1 501.95 14.2
 -12 -7 -1 123.29 6.2
 -12 -7 -1 140.49 8.5
 -12 -7 -1 126.89 8.5
 12 7 1 133.59 7.8
 -13 -7 -1 66.09 8.3
 -13 -7 -1 63.89 5.8
 -13 -7 -1 50.29 8.2
 13 7 1 72.29 7.5
 -14 -7 -1 5.6 4.8
 -14 -7 -1 1.2 5.4
 -14 -7 -1 8.2 3.5
 14 7 1 11.2 4.4
 -15 -7 -1 10.5 6.2
 -15 -7 -1 14.1 5.6
 -15 -7 -1 17.8 4.4
 15 7 1 16.3 5.2
 -16 -7 -1 28.2 6.5
 -16 -7 -1 27.1 7.2
 16 7 1 26.9 5.9
 15 -8 -1 124.29 11
 15 -8 -1 119.49 10
 -15 8 1 127.09 9.6
 -15 8 1 122.29 11.5
 14 -8 -1 211.88 11.8
 14 -8 -1 203.48 11.1
 -14 8 1 217.28 10.5
 -14 8 1 213.48 12.4
 13 -8 -1 98.59 9
 13 -8 -1 103.89 8.8
 13 -8 -1 99.19 8.7
 -13 8 1 97.59 9.6
 -13 8 1 102.39 8
 12 -8 -1 139.09 8.3
 12 -8 -1 145.29 9.1
 12 -8 -1 139.79 9
 12 -8 -1 137.49 8.9
 -12 8 1 146.89 8.1
 -12 8 1 140.29 9.4
 11 -8 -1 19.1 4.3
 11 -8 -1 17.5 3.7
 11 -8 -1 20.1 4.1
 11 -8 -1 13 4
 -11 8 1 21.4 3.8
 -11 8 1 17.7 4.2
 10 -8 -1 -11.1 3.1
 10 -8 -1 -1.1 3
 10 -8 -1 -0.9 3.3
 -10 8 1 0.2 2.9
 -10 8 1 -1.3 3.3
 8 -8 -1 344.37 11.2
 8 -8 -1 335.57 9.9
 8 -8 -1 348.97 10.7
 8 -8 -1 341.37 10.8
 -8 8 1 354.66 11.1
 -8 8 1 332.77 10.2
 7 -8 -1 306.47 9.5
 7 -8 -1 303.87 9.8
 7 -8 -1 317.17 10.1
 7 -8 -1 308.37 8.8
 -7 8 1 297.17 9.8
 -7 8 1 310.47 9.2
 6 -8 -1 508.35 13.4
 6 -8 -1 511.25 12.3
 6 -8 -1 542.05 14.3
 6 -8 -1 525.45 14
 6 -8 -1 511.25 13
 -6 8 1 507.95 13.8
 -6 8 1 504.35 13.2
 5 -8 -1 144.99 6.4
 5 -8 -1 159.38 5.7
 -5 8 1 153.58 5.5
 4 -8 -1 424.56 11.2
 -4 8 1 421.96 11.2
 -4 8 1 430.56 10.9
 3 -8 -1 1.3 1.9
 3 -8 -1 2.9 1.6
 3 -8 -1 2 1.4
 3 -8 -1 4.1 1.4
 3 -8 -1 2 1.9
 3 -8 -1 7.2 2.1
 -3 8 1 5.8 1.8
 -3 8 1 2.9 1.5
 -3 8 1 2.5 1.5
 2 -8 -1 705.63 17.8
 2 -8 -1 695.03 17.4
 2 -8 -1 714.23 17.7
 2 -8 -1 708.53 16.5
 2 -8 -1 711.33 16.6
 2 -8 -1 707.33 16.8
 -2 8 1 704.13 16.7
 -2 8 1 724.73 17
 -2 8 1 726.23 16.8
 1 -8 -1 5.8 1.9
 1 -8 -1 6.1 1.9
 1 -8 -1 5.6 1.9
 1 -8 -1 3.6 1.6
 1 -8 -1 1.9 1.9
 1 -8 -1 5.4 1.1
 1 -8 -1 5.9 1.4
 -1 8 1 3.6 1.4
 -1 8 1 4.4 1.2
 0 -8 -1 60.89 3.9
 0 -8 -1 59.69 3.7
 0 -8 -1 63.39 3.6
 0 -8 -1 62.29 3.4
 0 8 1 58.59 2.5
 0 8 1 58.29 2.6
 0 8 1 57.79 2.7
 -1 -8 -1 353.46 9.3
 -1 -8 -1 365.76 9.4
 -1 -8 -1 344.37 9.8
 -1 -8 -1 334.97 9.6
 1 8 1 357.26 8.6
 1 8 1 367.86 8.7
 -2 -8 -1 884.41 20.9
 -2 -8 -1 908.61 20.6
 -2 -8 -1 887.71 20.6
 -2 -8 -1 868.91 20.9
 2 8 1 827.22 19.9
 2 8 1 854.01 19.9
 -3 -8 -1 229.68 7.4
 -3 -8 -1 238.98 7.1
 -3 -8 -1 237.08 7.4
 3 8 1 234.98 6.1
 3 8 1 239.48 6.2
 -4 -8 -1 934.71 21.6
 -4 -8 -1 910.71 21.9
 -4 -8 -1 882.91 21.9
 4 8 1 904.21 20.8
 -5 -8 -1 237.18 7.8
 -5 -8 -1 242.38 7.6
 -5 -8 -1 236.28 7.9
 -5 -8 -1 236.58 6.6
 5 8 1 244.18 6.6
 -6 -8 -1 3.5 2.6
 -6 -8 -1 0.2 2.5
 -6 -8 -1 1.7 1.6
 -6 -8 -1 5.5 2.3
 6 8 1 1.3 1.6
 -7 -8 -1 14.7 3.2
 -7 -8 -1 16 3.1
 -7 -8 -1 14.6 2.8
 -7 -8 -1 13.7 2
 7 8 1 13.7 2.1
 -8 -8 -1 30 3.5
 -8 -8 -1 15.1 2.3
 -8 -8 -1 21 3.7
 -9 -8 -1 17.4 3.6
 -9 -8 -1 14.4 3.9
 -9 -8 -1 18.5 2.5
 -9 -8 -1 17.1 3
 9 8 1 24.2 4.6
 -10 -8 -1 137.39 7.8
 -10 -8 -1 137.29 5.9
 -10 -8 -1 142.79 8.2
 10 8 1 149.19 6.9
 -11 -8 -1 489.65 15
 -11 -8 -1 491.25 13.1
 -11 -8 -1 479.65 15.1
 11 8 1 491.75 14.2
 -12 -8 -1 261.27 11
 -12 -8 -1 247.78 8.8
 -12 -8 -1 240.68 10.8
 12 8 1 253.27 10.1
 -13 -8 -1 296.67 10.1
 -13 -8 -1 320.47 12.9
 -13 -8 -1 294.57 12.4
 13 8 1 301.37 11.7
 -14 -8 -1 24.9 6.4
 -14 -8 -1 29.4 5.9
 14 8 1 44.5 7.9
 -15 -8 -1 20.1 6.8
 -15 -8 -1 29 6.3
 15 8 1 21.7 5.2
 -16 -8 -1 42.1 7.1
 -16 -8 -1 22.8 7.5
 16 8 1 15.1 5.6
 15 -9 -1 59.49 10.1
 15 -9 -1 76.59 9.8
 -15 9 1 68.79 11
 -15 9 1 65.49 9
 14 -9 -1 105.69 9.7
 14 -9 -1 111.09 10.2
 -14 9 1 94.99 8.7
 -14 9 1 93.79 10.9
 13 -9 -1 313.37 13
 13 -9 -1 328.97 12.8
 13 -9 -1 330.77 13.2
 -13 9 1 331.17 13.9
 -13 9 1 324.17 12
 12 -9 -1 194.08 10.2
 12 -9 -1 181.08 9.9
 12 -9 -1 192.68 10
 -12 9 1 190.88 9.2
 -12 9 1 188.68 10.7
 11 -9 -1 97.69 7.3
 11 -9 -1 106.79 8.1
 11 -9 -1 98.89 7.9
 11 -9 -1 115.19 8
 -11 9 1 100.99 8.2
 -11 9 1 85.99 6.9
 10 -9 -1 130.79 8.2
 10 -9 -1 136.99 7.5
 10 -9 -1 115.39 7.7
 -10 9 1 124.49 8.2
 -10 9 1 132.19 7.2
 9 -9 -1 -0.7 3.4
 9 -9 -1 2.2 3
 9 -9 -1 -3.3 3
 -9 9 1 3.7 2.9
 -9 9 1 -6.6 3.1
 8 -9 -1 26.6 4.2
 8 -9 -1 28.7 5.1
 8 -9 -1 32.4 5.6
 8 -9 -1 24.8 3.4
 -8 9 1 24.7 3.6
 -8 9 1 23.8 3.2
 7 -9 -1 177.68 5.5
 7 -9 -1 193.28 7.3
 7 -9 -1 181.58 6.5
 7 -9 -1 197.48 8.2
 7 -9 -1 196.38 7.7
 -7 9 1 196.18 7.1
 -7 9 1 196.88 7.8
 6 -9 -1 647.44 16.5
 6 -9 -1 648.34 17.2
 6 -9 -1 657.83 17.5
 6 -9 -1 648.84 15.4
 -6 9 1 663.73 17
 -6 9 1 664.33 16.4
 5 -9 -1 670.73 16.2
 5 -9 -1 643.14 15.4
 5 -9 -1 679.53 17.3
 5 -9 -1 638.44 17
 -5 9 1 643.14 16.6
 -5 9 1 642.64 16.1
 4 -9 -1 201.88 6.7
 4 -9 -1 207.08 7.5
 4 -9 -1 205.28 5.9
 -4 9 1 216.78 6.6
 -4 9 1 204.18 6.9
 3 -9 -1 374.66 9.8
 3 -9 -1 369.46 9.5
 3 -9 -1 374.26 10.9
 3 -9 -1 369.86 9.6
 3 -9 -1 354.16 10.5
 3 -9 -1 376.56 10.9
 -3 9 1 389.76 10.2
 -3 9 1 383.36 10
 -3 9 1 367.16 9.7
 2 -9 -1 80.69 3.5
 2 -9 -1 85.79 5.1
 2 -9 -1 86.29 4.9
 2 -9 -1 74.59 3.4
 2 -9 -1 81.69 3.8
 2 -9 -1 71.89 4.7
 -2 9 1 81.79 3.8
 -2 9 1 85.19 3.8
 -2 9 1 78.09 3.6
 1 -9 -1 104.19 4.4
 1 -9 -1 109.89 5.2
 1 -9 -1 113.49 4.1
 1 -9 -1 116.59 5.2
 1 -9 -1 109.69 3.6
 -1 9 1 112.89 4.1
 -1 9 1 112.79 4
 0 -9 -1 123.79 5.4
 0 -9 -1 129.29 4.9
 0 -9 -1 121.59 4.8
 0 -9 -1 120.79 5.4
 0 9 1 141.39 4.7
 0 9 1 127.39 4.1
 -1 -9 -1 98.19 4.5
 -1 -9 -1 97.39 4.8
 -1 -9 -1 97.89 4.4
 -1 -9 -1 101.99 5
 1 9 1 99.09 3.4
 1 9 1 97.79 3.4
 -2 -9 -1 1379.76 32
 -2 -9 -1 1395.46 31.7
 -2 -9 -1 1408.06 32.2
 -2 -9 -1 1428.66 31.7
 2 9 1 1356.76 30.9
 2 9 1 1275.17 30.9
 -3 -9 -1 117.09 5.5
 -3 -9 -1 126.09 5.1
 -3 -9 -1 119.09 5.4
 3 9 1 111.89 4.1
 3 9 1 113.19 3.7
 -4 -9 -1 797.62 19.7
 -4 -9 -1 773.12 19.6
 -4 -9 -1 781.72 19.2
 4 9 1 807.42 18.4
 -5 -9 -1 84.59 5.1
 -5 -9 -1 93.29 5.2
 -5 -9 -1 91.99 5.5
 5 9 1 89.39 3.8
 -6 -9 -1 132.69 6.5
 -6 -9 -1 127.89 6.2
 -6 -9 -1 131.29 4.8
 -6 -9 -1 141.59 6.4
 6 9 1 129.69 4.9
 -7 -9 -1 8.6 3.3
 -7 -9 -1 7.6 3
 -7 -9 -1 8.5 3.1
 7 9 1 5.6 2.1
 -8 -9 -1 55.79 5.8
 -8 -9 -1 55.99 6
 8 9 1 60.19 4.6
 -9 -9 -1 71.99 6.7
 -9 -9 -1 77.79 6.7
 9 9 1 70.49 5.3
 -10 -9 -1 140.79 6.3
 -10 -9 -1 151.38 8.3
 -10 -9 -1 141.09 8.6
 10 9 1 141.39 7
 -11 -9 -1 370.46 11
 -11 -9 -1 365.36 12.9
 -11 -9 -1 390.96 13.5
 11 9 1 358.96 11.8
 -12 -9 -1 502.45 16
 -12 -9 -1 484.45 13.8
 -12 -9 -1 508.45 16.4
 12 9 1 492.65 14.9
 -13 -9 -1 83.69 9.2
 -13 -9 -1 84.69 9.2
 13 9 1 78.49 8
 -14 -9 -1 78.39 9.7
 -14 -9 -1 78.09 9.9
 14 9 1 79.49 8.8
 -15 -9 -1 1.7 6.6
 -15 -9 -1 5.3 6.1
 15 9 1 7.1 5
 -16 -9 -1 16.2 7.5
 -16 -9 -1 9.2 6.5
 16 9 1 1.4 5.3
 14 -10 -1 42.2 6.4
 14 -10 -1 77.29 9.5
 -14 10 1 67.19 8.7
 -14 10 1 54.59 10.4
 13 -10 -1 142.69 10.2
 13 -10 -1 146.29 9.7
 13 -10 -1 147.39 10.1
 -13 10 1 131.69 10.7
 -13 10 1 140.39 9.1
 12 -10 -1 210.48 10.8
 12 -10 -1 191.78 10.1
 12 -10 -1 193.88 10.4
 -12 10 1 201.78 11.2
 -12 10 1 202.78 9.6
 11 -10 -1 256.37 10.8
 11 -10 -1 271.67 11.6
 11 -10 -1 259.67 10.6
 11 -10 -1 253.17 10.8
 -11 10 1 268.87 11.4
 -11 10 1 258.97 10.2
 10 -10 -1 118.59 7.7
 10 -10 -1 97.19 7.5
 10 -10 -1 107.79 8.5
 -10 10 1 119.59 7.2
 -10 10 1 114.89 8.3
 9 -10 -1 106.49 7
 9 -10 -1 80.29 7
 9 -10 -1 105.09 8
 -9 10 1 100.79 6.5
 -9 10 1 84.29 7.4
 8 -10 -1 5.2 3.5
 8 -10 -1 -3.1 2.8
 8 -10 -1 0.7 3
 -8 10 1 2.5 3.1
 -8 10 1 -1.5 2.7
 7 -10 -1 316.17 9.9
 7 -10 -1 313.07 10.5
 7 -10 -1 308.37 8.3
 7 -10 -1 322.67 11.1
 -7 10 1 307.27 9.6
 -7 10 1 318.97 10.5
 6 -10 -1 539.65 13.2
 6 -10 -1 561.04 15.6
 6 -10 -1 549.74 14.4
 6 -10 -1 528.75 15.2
 -6 10 1 548.85 14.3
 -6 10 1 562.94 14.9
 5 -10 -1 442.86 11.1
 5 -10 -1 449.26 13.1
 5 -10 -1 439.56 13.3
 5 -10 -1 449.56 11.9
 -5 10 1 456.05 12
 -5 10 1 449.86 12.5
 4 -10 -1 155.38 5.2
 4 -10 -1 152.08 5.7
 4 -10 -1 178.78 7.3
 4 -10 -1 151.38 7
 4 -10 -1 155.38 6.7
 -4 10 1 160.48 6.2
 -4 10 1 165.28 6.2
 -4 10 1 163.08 5.8
 3 -10 -1 487.45 13.7
 3 -10 -1 503.75 14.1
 3 -10 -1 507.65 14.1
 3 -10 -1 516.45 12.9
 3 -10 -1 504.75 12.6
 3 -10 -1 512.05 12.6
 -3 10 1 508.15 13
 -3 10 1 520.45 13.2
 -3 10 1 509.45 12.8
 2 -10 -1 446.06 11.3
 2 -10 -1 439.56 11.2
 2 -10 -1 437.56 10.9
 2 -10 -1 429.36 12.6
 2 -10 -1 451.35 12.7
 2 -10 -1 426.16 12.2
 -2 10 1 449.66 11.2
 -2 10 1 460.35 11.4
 -2 10 1 458.25 11.5
 1 -10 -1 177.78 5.1
 1 -10 -1 183.38 7.1
 1 -10 -1 180.48 5.8
 1 -10 -1 191.88 6.1
 1 -10 -1 189.18 7
 -1 10 1 183.78 5.6
 -1 10 1 195.48 5.8
 0 -10 -1 1.9 2.4
 0 -10 -1 3.5 2.3
 0 -10 -1 4.9 2.1
 0 -10 -1 2.1 2.3
 0 10 1 3.9 1.3
 -1 -10 -1 127.49 5.7
 -1 -10 -1 133.09 5.3
 -1 -10 -1 125.09 5.9
 -1 -10 -1 134.99 5.4
 1 10 1 132.29 4.3
 1 10 1 128.29 4.2
 -2 -10 -1 485.15 12.9
 -2 -10 -1 497.75 12.4
 -2 -10 -1 471.85 12.8
 2 10 1 480.05 11.3
 2 10 1 411.16 11.4
 -3 -10 -1 75.59 4.6
 -3 -10 -1 75.89 5
 -3 -10 -1 78.59 5.2
 3 10 1 63.69 3.4
 3 10 1 80.09 3.2
 -4 -10 -1 529.15 14.3
 -4 -10 -1 523.75 14.4
 -4 -10 -1 529.05 13.8
 4 10 1 523.05 12.9
 -5 -10 -1 222.18 7.9
 -5 -10 -1 214.28 8.3
 -5 -10 -1 221.68 8.2
 5 10 1 228.78 6.6
 -6 -10 -1 252.97 9.4
 -6 -10 -1 268.17 9.4
 -6 -10 -1 258.57 9
 6 10 1 263.77 7.6
 -7 -10 -1 571.44 15.9
 -7 -10 -1 566.94 15.8
 -7 -10 -1 576.34 15.6
 7 10 1 558.14 14.3
 -8 -10 -1 125.39 7.7
 -8 -10 -1 118.49 7.2
 -8 -10 -1 128.49 7.3
 8 10 1 127.69 5.9
 -9 -10 -1 0.5 3.9
 -9 -10 -1 7 3.9
 9 10 1 0.3 2.6
 -10 -10 -1 177.38 9.2
 -10 -10 -1 184.28 9.4
 10 10 1 187.28 7.8
 -11 -10 -1 220.58 10.5
 -11 -10 -1 224.68 10.3
 11 10 1 203.08 8.9
 -12 -10 -1 257.87 11.9
 -12 -10 -1 268.37 12.2
 12 10 1 270.77 10.5
 -13 -10 -1 304.37 13.1
 -13 -10 -1 300.57 13.1
 13 10 1 271.57 11.5
 -14 -10 -1 77.69 10.4
 -14 -10 -1 88.09 10.5
 14 10 1 68.19 8.7
 -15 -10 -1 63.89 10.8
 -15 -10 -1 45.1 7.9
 15 10 1 48.4 9.2
 14 -11 -1 19 6
 -14 11 1 19.8 5.4
 -14 11 1 17.1 5.9
 13 -11 -1 91.39 9.9
 -13 11 1 73.49 9.9
 -13 11 1 74.59 8.4
 12 -11 -1 378.96 14.5
 -12 11 1 368.66 13.1
 -12 11 1 367.26 14.7
 11 -11 -1 482.75 16.3
 -11 11 1 490.65 16.1
 -11 11 1 472.95 14.6
 10 -11 -1 260.87 11.7
 10 -11 -1 254.57 10.5
 10 -11 -1 260.17 10.6
 10 -11 -1 257.47 10.5
 -10 11 1 268.27 11.2
 -10 11 1 279.37 10.2
 9 -11 -1 81.29 6.8
 9 -11 -1 83.89 7.8
 9 -11 -1 86.69 7.2
 -9 11 1 83.69 6.5
 -9 11 1 81.49 7.5
 8 -11 -1 4.2 3.8
 8 -11 -1 -2.6 2.9
 8 -11 -1 -4.9 3.2
 -8 11 1 2.9 3.2
 -8 11 1 0.4 2.9
 7 -11 -1 10.3 3.5
 7 -11 -1 13.1 3.1
 7 -11 -1 19.4 4
 -7 11 1 11 3
 -7 11 1 17.8 3.4
 6 -11 -1 335.57 11.2
 6 -11 -1 326.27 8.9
 6 -11 -1 325.57 10
 6 -11 -1 346.47 11.9
 -6 11 1 336.57 10.7
 -6 11 1 356.66 10.2
 5 -11 -1 297.97 10.3
 5 -11 -1 276.47 8.8
 5 -11 -1 280.07 8
 5 -11 -1 308.37 10.5
 -5 11 1 305.47 9
 -5 11 1 287.67 9.4
 4 -11 -1 236.28 7.1
 4 -11 -1 257.87 9.3
 4 -11 -1 241.48 9.1
 4 -11 -1 232.78 8.5
 4 -11 -1 249.48 7.4
 -4 11 1 245.78 8
 -4 11 1 237.08 7.7
 3 -11 -1 569.44 14.1
 3 -11 -1 576.34 14.3
 3 -11 -1 603.74 15.7
 3 -11 -1 574.64 15.6
 3 -11 -1 575.94 16.1
 3 -11 -1 565.34 16
 -3 11 1 573.04 14.5
 -3 11 1 589.54 14.7
 2 -11 -1 301.37 10
 2 -11 -1 333.47 10.5
 2 -11 -1 322.07 8.4
 2 -11 -1 312.57 8.9
 2 -11 -1 311.47 8.7
 -2 11 1 327.47 8.9
 -2 11 1 327.77 8.8
 1 -11 -1 118.09 4.6
 1 -11 -1 115.09 6.1
 1 -11 -1 122.79 6.2
 1 -11 -1 118.49 5.1
 -1 11 1 118.79 4.6
 -1 11 1 125.29 4.7
 0 -11 -1 270.47 9.1
 0 -11 -1 271.97 9.1
 0 -11 -1 268.47 8.3
 0 -11 -1 285.07 8.7
 0 11 1 283.97 7.5
 -1 -11 -1 -0.1 2.3
 -1 -11 -1 2.9 2.7
 -1 -11 -1 1.2 2.5
 -1 -11 -1 3.5 2.5
 1 11 1 2.7 1.4
 -2 -11 -1 91.89 5.1
 -2 -11 -1 97.49 5.8
 -2 -11 -1 97.89 5.5
 2 11 1 96.09 3.7
 -3 -11 -1 506.25 13.3
 -3 -11 -1 489.45 13.8
 -3 -11 -1 523.85 14.1
 3 11 1 476.95 12.1
 -4 -11 -1 208.08 7.6
 -4 -11 -1 210.38 8.2
 -4 -11 -1 214.08 8.3
 4 11 1 207.28 6.6
 -5 -11 -1 362.06 11.5
 -5 -11 -1 354.56 10.9
 -5 -11 -1 357.76 11.5
 5 11 1 380.96 9.8
 -6 -11 -1 835.42 21.5
 -6 -11 -1 839.32 22
 -6 -11 -1 871.91 22.2
 6 11 1 861.21 20.4
 -7 -11 -1 224.48 9
 -7 -11 -1 235.98 9.5
 -7 -11 -1 228.88 9.5
 7 11 1 219.88 7.5
 -8 -11 -1 23.4 4.3
 -8 -11 -1 24.5 4.4
 -8 -11 -1 19.9 3.9
 8 11 1 15.6 2.7
 -9 -11 -1 7.9 4.5
 -9 -11 -1 2 4.2
 9 11 1 1.5 2.6
 -10 -11 -1 36.5 5.3
 -10 -11 -1 31.6 5.4
 10 11 1 42.3 5.8
 -11 -11 -1 34.7 5.9
 -11 -11 -1 28.8 5.5
 11 11 1 38.3 6.3
 -12 -11 -1 218.28 11.5
 -12 -11 -1 219.68 12.1
 12 11 1 218.18 9.8
 -13 -11 -1 249.78 12.9
 -13 -11 -1 232.68 12.3
 13 11 1 210.68 10.6
 -14 -11 -1 179.88 12.6
 -14 -11 -1 192.58 12.6
 14 11 1 166.28 10.5
 -15 -11 -1 151.78 12.8
 -15 -11 -1 169.68 13.1
 15 11 1 152.28 10.9
 13 -12 -1 91.99 10.5
 -13 12 1 96.19 9.2
 -13 12 1 92.09 10.4
 12 -12 -1 200.68 11.8
 -12 12 1 191.08 11.6
 -12 12 1 199.28 10.1
 11 -12 -1 423.56 15.6
 -11 12 1 405.96 13.6
 -11 12 1 411.96 14.9
 10 -12 -1 145.19 10.1
 10 -12 -1 131.69 8.6
 -10 12 1 131.99 8.1
 -10 12 1 141.49 9.2
 9 -12 -1 192.68 10.3
 9 -12 -1 200.38 9.5
 -9 12 1 212.98 9.8
 -9 12 1 205.68 8.8
 8 -12 -1 121.29 8
 8 -12 -1 135.69 9
 -8 12 1 109.89 6.9
 -8 12 1 131.09 7.9
 7 -12 -1 11.4 4.2
 7 -12 -1 1.6 3.7
 -7 12 1 5.4 3
 -7 12 1 7.7 3.2
 6 -12 -1 138.79 8.4
 6 -12 -1 132.59 7.7
 -6 12 1 140.89 7.1
 -6 12 1 139.39 6.6
 5 -12 -1 326.27 11.4
 5 -12 -1 320.87 9.1
 5 -12 -1 344.97 11.8
 -5 12 1 325.07 10.4
 -5 12 1 337.27 10
 4 -12 -1 323.97 10.9
 4 -12 -1 328.57 11.4
 4 -12 -1 340.47 11.5
 4 -12 -1 318.27 9.1
 -4 12 1 322.37 10
 -4 12 1 335.97 9.7
 3 -12 -1 200.18 8.4
 3 -12 -1 200.68 6.8
 3 -12 -1 214.98 8.9
 -3 12 1 209.08 6.9
 -3 12 1 208.48 7.2
 2 -12 -1 731.13 19.4
 2 -12 -1 711.83 17.7
 2 -12 -1 725.53 19
 2 -12 -1 726.93 18
 -2 12 1 740.23 17.7
 -2 12 1 731.23 17.8
 1 -12 -1 400.66 12.3
 1 -12 -1 413.56 12.7
 1 -12 -1 405.46 11.2
 -1 12 1 414.76 10.8
 -1 12 1 419.96 10.8
 0 -12 -1 321.17 9.8
 0 -12 -1 314.57 10.4
 0 -12 -1 305.37 9.3
 0 -12 -1 305.27 10.5
 0 12 1 323.57 8.6
 -1 -12 -1 2.6 2.9
 -1 -12 -1 2.6 2.8
 -1 -12 -1 5.8 3
 1 12 1 4.5 1.6
 -2 -12 -1 20.4 3.4
 -2 -12 -1 17.4 3.5
 -2 -12 -1 19.1 3.4
 2 12 1 19.9 2.8
 -3 -12 -1 440.36 12.9
 -3 -12 -1 427.66 12.1
 -3 -12 -1 416.16 12.6
 3 12 1 409.86 10.6
 -4 -12 -1 103.59 6.1
 -4 -12 -1 103.49 6.5
 -4 -12 -1 92.59 6.4
 4 12 1 68.89 4.1
 -5 -12 -1 405.66 12.9
 -5 -12 -1 417.26 12.2
 -5 -12 -1 404.86 12.8
 5 12 1 414.36 11.2
 -6 -12 -1 327.57 11.6
 -6 -12 -1 347.47 11.8
 -6 -12 -1 334.17 11
 6 12 1 333.57 9.6
 -7 -12 -1 404.96 13.2
 -7 -12 -1 407.86 12.7
 -7 -12 -1 390.86 13.1
 7 12 1 394.36 11.1
 -8 -12 -1 346.17 12
 -8 -12 -1 351.26 12.3
 -8 -12 -1 342.07 12.5
 8 12 1 330.57 10.2
 -9 -12 -1 58.49 7.7
 -9 -12 -1 65.19 8.6
 9 12 1 59.49 5.7
 -10 -12 -1 13.2 5.4
 -10 -12 -1 12.2 5.2
 10 12 1 13.3 3.3
 -11 -12 -1 41.2 6.6
 -11 -12 -1 56.19 9.4
 11 12 1 44.3 6.7
 -12 -12 -1 227.18 12.2
 -12 -12 -1 231.38 12.1
 12 12 1 209.38 10
 -13 -12 -1 257.07 13.2
 -13 -12 -1 269.97 13.6
 13 12 1 246.78 11.2
 -14 -12 -1 151.28 12.1
 -14 -12 -1 155.78 12.9
 14 12 1 121.19 9.9
 13 -13 -1 71.59 11.1
 -13 13 1 81.09 9.3
 -13 13 1 104.49 10.8
 12 -13 -1 121.69 11.2
 -12 13 1 111.29 10.6
 -12 13 1 108.49 9
 11 -13 -1 154.98 11.3
 -11 13 1 147.99 10.2
 -11 13 1 145.89 9.1
 10 -13 -1 226.98 12.4
 -10 13 1 252.87 11.4
 -10 13 1 235.58 10.1
 9 -13 -1 281.07 12.3
 9 -13 -1 270.27 11.3
 -9 13 1 268.87 11.2
 -9 13 1 272.57 10.3
 8 -13 -1 101.19 8.8
 8 -13 -1 83.59 7.8
 -8 13 1 79.69 6.6
 -8 13 1 94.09 7.5
 7 -13 -1 115.49 8.8
 7 -13 -1 106.49 8
 -7 13 1 107.59 6.7
 -7 13 1 112.59 7.4
 6 -13 -1 24.8 4.4
 6 -13 -1 38.1 7.3
 -6 13 1 25.3 3.5
 -6 13 1 21.9 3.7
 5 -13 -1 65.49 7
 5 -13 -1 69.99 4.7
 5 -13 -1 66.99 7.4
 -5 13 1 77.29 6
 -5 13 1 59.49 5.3
 4 -13 -1 427.06 11.8
 4 -13 -1 448.16 14.4
 4 -13 -1 465.65 13.9
 -4 13 1 456.05 12.7
 -4 13 1 448.96 12.4
 3 -13 -1 425.16 11.8
 3 -13 -1 444.16 14
 3 -13 -1 436.26 13.5
 -3 13 1 440.66 11.9
 -3 13 1 447.66 12.2
 2 -13 -1 665.03 18.5
 2 -13 -1 641.34 17.9
 2 -13 -1 659.53 16.5
 -2 13 1 660.93 16.5
 -2 13 1 665.73 16.4
 1 -13 -1 297.77 10.8
 1 -13 -1 292.47 9.2
 1 -13 -1 297.07 10.5
 -1 13 1 299.57 8.6
 -1 13 1 307.87 8.7
 0 -13 -1 248.78 9.4
 0 -13 -1 273.37 10.1
 0 -13 -1 259.17 8.9
 0 13 1 260.97 7.6
 -1 -13 -1 240.28 9.6
 -1 -13 -1 243.58 8.6
 -1 -13 -1 244.28 9.3
 1 13 1 246.48 7.1
 -2 -13 -1 38.1 5.9
 -2 -13 -1 40.3 5.9
 -2 -13 -1 31.8 4
 2 13 1 34.2 3.2
 -3 -13 -1 56.59 6.4
 -3 -13 -1 46.8 5.5
 -3 -13 -1 50.59 6.2
 3 13 1 51.19 3.4
 -4 -13 -1 55.39 6.4
 -4 -13 -1 53.79 6
 -4 -13 -1 50.99 6
 4 13 1 42.3 3.7
 -5 -13 -1 296.67 10.9
 -5 -13 -1 284.67 10.8
 -5 -13 -1 292.17 10.3
 5 13 1 268.47 8.4
 -6 -13 -1 280.47 10.5
 -6 -13 -1 277.57 10.8
 -6 -13 -1 278.47 10.9
 6 13 1 266.17 8.8
 -7 -13 -1 247.88 11.1
 -7 -13 -1 255.27 10.4
 -7 -13 -1 251.57 10.6
 7 13 1 250.07 8.6
 -8 -13 -1 530.15 16.3
 -8 -13 -1 542.75 16.8
 -8 -13 -1 531.65 16.8
 8 13 1 544.65 14.6
 -9 -13 -1 151.48 9.8
 -9 -13 -1 149.29 10
 9 13 1 143.69 7.4
 -10 -13 -1 55.99 9
 -10 -13 -1 69.99 8.8
 10 13 1 52.09 6.4
 -11 -13 -1 22.7 6.6
 -11 -13 -1 24.8 6.4
 11 13 1 19.2 4
 -12 -13 -1 109.29 10.9
 -12 -13 -1 109.99 11
 12 13 1 103.59 8.5
 -13 -13 -1 187.48 13.1
 -13 -13 -1 158.38 12.3
 13 13 1 164.28 10
 -14 -13 -1 163.58 13.3
 -14 -13 -1 155.98 12.9
 14 13 1 152.98 10.6
 12 -14 -1 139.49 12.2
 -12 14 1 140.89 11.3
 -12 14 1 139.49 9.7
 11 -14 -1 78.99 10.5
 -11 14 1 53.99 9.2
 -11 14 1 61.69 8.2
 10 -14 -1 189.58 11.8
 -10 14 1 188.58 9.6
 -10 14 1 199.48 10.8
 9 -14 -1 172.08 11.4
 9 -14 -1 162.08 9.9
 -9 14 1 176.68 8.8
 -9 14 1 166.38 9.7
 8 -14 -1 369.76 14.3
 8 -14 -1 341.47 13.3
 -8 14 1 353.46 11.8
 -8 14 1 352.96 12.7
 7 -14 -1 97.89 8.4
 7 -14 -1 103.29 9.6
 -7 14 1 97.99 7.5
 -7 14 1 111.39 6.9
 6 -14 -1 9.7 4.5
 -6 14 1 5.9 3.2
 -6 14 1 3.6 3.1
 5 -14 -1 0.8 4.2
 -5 14 1 -2.1 2.8
 -5 14 1 0.8 2.9
 4 -14 -1 187.18 9.9
 4 -14 -1 182.88 7
 4 -14 -1 194.38 9.3
 -4 14 1 195.18 7.5
 -4 14 1 195.78 7.9
 3 -14 -1 367.66 10.8
 3 -14 -1 375.46 12.7
 3 -14 -1 395.36 13.4
 -3 14 1 380.56 10.9
 -3 14 1 384.16 11.2
 2 -14 -1 239.68 10.4
 2 -14 -1 233.18 9.9
 -2 14 1 244.58 7.9
 -2 14 1 244.08 8
 1 -14 -1 617.54 17.8
 1 -14 -1 609.74 17.4
 -1 14 1 616.04 15.4
 -1 14 1 601.34 15.4
 0 -14 -1 273.27 10.6
 0 -14 -1 292.37 11.1
 0 -14 -1 292.67 10
 0 14 1 284.17 8.3
 -1 -14 -1 357.16 12.3
 -1 -14 -1 338.97 11.1
 -1 -14 -1 340.77 11.9
 1 14 1 365.96 9.5
 -2 -14 -1 9.6 3.9
 -2 -14 -1 8.6 3.8
 -2 -14 -1 9.4 3.8
 2 14 1 6.1 1.8
 -3 -14 -1 3.1 3.6
 -3 -14 -1 2.7 3.8
 -4 -14 -1 89.29 7.9
 -4 -14 -1 82.59 7.5
 -4 -14 -1 84.59 6.9
 4 14 1 62.49 4.1
 -5 -14 -1 199.28 9.6
 -5 -14 -1 207.38 10.1
 -5 -14 -1 202.78 9.1
 5 14 1 189.98 6.7
 -6 -14 -1 192.68 9.1
 -6 -14 -1 195.78 10.1
 -6 -14 -1 190.28 9.8
 6 14 1 177.68 7
 -7 -14 -1 599.94 18.2
 -7 -14 -1 601.74 18.1
 -7 -14 -1 588.44 17.3
 7 14 1 588.74 15.9
 -8 -14 -1 190.88 10.4
 -8 -14 -1 201.18 10.8
 -8 -14 -1 198.08 10.1
 8 14 1 201.28 8.4
 -9 -14 -1 149.69 10.6
 -9 -14 -1 139.39 9.7
 -9 -14 -1 154.88 10.4
 9 14 1 137.29 7.7
 -10 -14 -1 96.09 10.1
 -10 -14 -1 85.29 9.9
 10 14 1 82.39 7.3
 -11 -14 -1 43 7.3
 -11 -14 -1 54.49 10.2
 11 14 1 39.7 7.3
 -12 -14 -1 116.79 11.6
 -12 -14 -1 115.89 11.5
 12 14 1 94.79 8.6
 -13 -14 -1 33.2 7.5
 -13 -14 -1 51.79 8.6
 13 14 1 32.2 5.2
 11 -15 -1 119.89 12.3
 -11 15 1 114.69 10.5
 -11 15 1 134.89 9.5
 10 -15 -1 275.87 14.3
 -10 15 1 260.27 12.3
 -10 15 1 259.97 11.2
 9 -15 -1 157.08 11.5
 -9 15 1 156.98 9.7
 -9 15 1 149.79 8.8
 8 -15 -1 141.89 10.8
 -8 15 1 138.59 8.2
 -8 15 1 153.28 9.1
 7 -15 -1 76.49 9.5
 -7 15 1 69.89 7.4
 -7 15 1 50.79 6.6
 6 -15 -1 120.29 9.7
 -6 15 1 108.09 7.5
 -6 15 1 105.59 7.1
 5 -15 -1 6.5 4.7
 -5 15 1 9.6 3.2
 -5 15 1 8.3 3.2
 4 -15 -1 42.2 8
 4 -15 -1 29.7 5.1
 -4 15 1 31.5 5.5
 -4 15 1 41.1 5.3
 3 -15 -1 52.99 7.9
 3 -15 -1 43.1 7.3
 -3 15 1 39 4.8
 -3 15 1 37.9 5.2
 2 -15 -1 147.99 8.8
 2 -15 -1 140.49 9.2
 -2 15 1 148.99 6.4
 -2 15 1 144.49 6.5
 1 -15 -1 475.45 15.2
 1 -15 -1 500.95 15.9
 -1 15 1 503.05 13.1
 -1 15 1 483.95 13.1
 0 -15 -1 567.14 17.5
 0 -15 -1 577.14 17.1
 0 15 1 590.84 14.7
 0 15 1 582.64 14.9
 -1 -15 -1 504.85 15.9
 -1 -15 -1 551.44 16.5
 -1 -15 -1 507.15 15.1
 1 15 1 531.75 13.4
 -2 -15 -1 166.58 9.4
 -2 -15 -1 162.48 8
 -2 -15 -1 156.28 9
 2 15 1 160.68 5.8
 -3 -15 -1 41 6.7
 -4 -15 -1 13.6 4.6
 -4 -15 -1 16.3 4.5
 -4 -15 -1 9.4 4.3
 -5 -15 -1 122.39 8.3
 -5 -15 -1 125.49 8.9
 -5 -15 -1 128.99 9.1
 5 15 1 117.69 5.4
 -6 -15 -1 100.39 8.6
 -6 -15 -1 94.09 8.7
 -6 -15 -1 78.29 7.7
 6 15 1 69.69 5.1
 -7 -15 -1 123.99 8.9
 -7 -15 -1 127.39 9.6
 -7 -15 -1 121.99 9.8
 7 15 1 137.99 6.7
 -8 -15 -1 285.37 12.7
 -8 -15 -1 289.67 12.1
 -8 -15 -1 293.67 13
 8 15 1 285.07 10.3
 -9 -15 -1 322.67 13.3
 -9 -15 -1 330.27 14.5
 -9 -15 -1 330.17 14.2
 9 15 1 305.97 11.3
 -10 -15 -1 47 7.4
 -10 -15 -1 54.49 7.5
 10 15 1 55.89 7.7
 -11 -15 -1 27.9 7.4
 -11 -15 -1 30.7 7.3
 11 15 1 22.6 4.7
 -12 -15 -1 15.6 7.5
 -12 -15 -1 14.5 7
 12 15 1 0.4 4.4
 10 -16 -1 143.99 12.7
 -10 16 1 128.89 10.3
 -10 16 1 123.09 9.2
 9 -16 -1 114.79 11.2
 -9 16 1 107.19 9.2
 -9 16 1 92.59 8.4
 8 -16 -1 209.18 12.7
 -8 16 1 219.58 10.6
 -8 16 1 208.38 9.7
 7 -16 -1 70.99 10
 -7 16 1 55.99 6.9
 -7 16 1 61.19 7.6
 6 -16 -1 149.09 10.9
 -6 16 1 134.19 7.8
 -6 16 1 138.79 8.3
 5 -16 -1 153.98 11.2
 -5 16 1 129.89 7.6
 -5 16 1 137.29 7.9
 4 -16 -1 4.9 5
 4 -16 -1 5.3 4.8
 -4 16 1 -1.9 3
 -4 16 1 1.5 3.1
 3 -16 -1 5 4.7
 3 -16 -1 -4.1 4.4
 -3 16 1 -4.2 2.7
 -3 16 1 -2.7 2.8
 2 -16 -1 150.68 9.6
 2 -16 -1 157.58 10.5
 -2 16 1 136.39 6.7
 -2 16 1 148.79 6.8
 1 -16 -1 399.16 14.1
 1 -16 -1 398.06 14.7
 -1 16 1 425.26 11.6
 -1 16 1 406.26 11.5
 0 -16 -1 385.76 14.2
 0 -16 -1 377.96 13.7
 0 16 1 394.46 10.8
 0 16 1 375.76 10.9
 -1 -16 -1 241.68 10.2
 -1 -16 -1 253.97 11.6
 -1 -16 -1 249.78 11.1
 1 16 1 256.17 7.9
 1 16 1 261.67 8.2
 -2 -16 -1 111.79 8.8
 -2 -16 -1 104.39 9
 -2 -16 -1 96.79 7.5
 2 16 1 108.39 5
 -3 -16 -1 33.7 5.1
 -3 -16 -1 54.39 8.6
 -3 -16 -1 55.89 8.1
 -4 -16 -1 14.5 5.1
 -4 -16 -1 12.4 4.8
 -4 -16 -1 8.6 4.9
 4 16 1 5.2 2.1
 -5 -16 -1 17.6 5.1
 -5 -16 -1 17.1 5.3
 -5 -16 -1 16.9 5.1
 -6 -16 -1 53.49 8.8
 -6 -16 -1 39.9 6
 -6 -16 -1 39.4 5.9
 6 16 1 31.5 4.6
 -7 -16 -1 101.19 9.1
 -7 -16 -1 116.39 10.2
 -7 -16 -1 115.29 10.1
 7 16 1 101.09 6.4
 -8 -16 -1 63.79 9.1
 -8 -16 -1 63.69 10.2
 -8 -16 -1 64.69 9.9
 8 16 1 73.59 6.9
 -9 -16 -1 221.68 12.7
 -9 -16 -1 199.78 11.9
 -9 -16 -1 227.58 12.7
 9 16 1 223.88 10.4
 -10 -16 -1 147.69 12.8
 -10 -16 -1 138.49 12.1
 10 16 1 157.58 10
 -11 -16 -1 82.19 11.9
 -11 -16 -1 90.99 11.4
 11 16 1 81.49 10.8
 9 -17 -1 189.58 13.1
 -9 17 1 182.58 10.9
 -9 17 1 188.78 10.2
 8 -17 -1 92.89 11.4
 -8 17 1 107.49 9
 -8 17 1 100.79 8.2
 7 -17 -1 121.99 11.7
 -7 17 1 103.69 8.4
 -7 17 1 92.49 7.7
 6 -17 -1 161.58 12.2
 -6 17 1 125.89 8.1
 -6 17 1 139.19 8.6
 5 -17 -1 170.98 11.7
 -5 17 1 159.28 8.2
 -5 17 1 147.99 8.5
 4 -17 -1 65.39 9.8
 -4 17 1 50.39 6.2
 -4 17 1 55.99 6.5
 3 -17 -1 21.5 5.9
 3 -17 -1 20.6 5.5
 -3 17 1 25.9 3.6
 -3 17 1 24 3.7
 2 -17 -1 91.39 9.2
 2 -17 -1 86.09 9.8
 -2 17 1 83.89 6.1
 -2 17 1 89.69 6.2
 1 -17 -1 92.19 9.2
 1 -17 -1 75.09 9.5
 -1 17 1 89.59 5.7
 -1 17 1 79.09 5.8
 0 -17 -1 269.37 12.5
 0 -17 -1 252.97 12
 0 17 1 256.17 8.5
 0 17 1 277.37 8.9
 -1 -17 -1 222.68 11.9
 -1 -17 -1 222.18 10.1
 -1 -17 -1 222.78 11.3
 1 17 1 218.98 7.5
 1 17 1 216.08 7.7
 -2 -17 -1 179.98 9.7
 -2 -17 -1 179.48 10.6
 -2 -17 -1 172.48 10.9
 2 17 1 184.18 7
 -3 -17 -1 51.19 9.1
 -3 -17 -1 45.5 7.3
 -3 -17 -1 47.5 8.8
 -4 -17 -1 35.3 5.8
 -4 -17 -1 31.6 6
 -4 -17 -1 35.3 6.3
 -5 -17 -1 1.7 5.1
 -5 -17 -1 -0.3 5.2
 -5 -17 -1 1.8 5.5
 -6 -17 -1 -0.9 5.1
 -6 -17 -1 6.2 5.9
 -6 -17 -1 1.3 5.5
 -7 -17 -1 -2.1 5.4
 -7 -17 -1 -8.1 5.7
 -7 -17 -1 -2.1 5.7
 -8 -17 -1 111.49 11.8
 -8 -17 -1 120.79 11.1
 -8 -17 -1 114.09 10.8
 -9 -17 -1 134.59 12.4
 -9 -17 -1 136.19 12.6
 -9 -17 -1 134.39 11
 -10 -17 -1 144.29 12.5
 -10 -17 -1 129.89 12.6
 7 -18 -1 70.19 11.6
 -7 18 1 72.29 7.6
 -7 18 1 77.59 8.3
 6 -18 -1 119.49 12
 -6 18 1 105.89 8.5
 -6 18 1 103.69 7.9
 5 -18 -1 87.49 11.2
 -5 18 1 88.19 7.6
 -5 18 1 85.69 7.3
 4 -18 -1 65.09 10.7
 -4 18 1 59.29 6.7
 -4 18 1 60.39 6.8
 3 -18 -1 56.79 10.6
 3 -18 -1 60.99 9.7
 -3 18 1 60.59 6.5
 -3 18 1 57.89 6.5
 2 -18 -1 5.9 5.8
 2 -18 -1 6.1 5.8
 -2 18 1 5.2 3.3
 -2 18 1 9.3 3.2
 1 -18 -1 59.29 10.1
 1 -18 -1 63.59 10.1
 -1 18 1 57.39 5.7
 -1 18 1 56.49 5.7
 0 -18 -1 79.19 9.7
 0 -18 -1 85.09 10.7
 0 18 1 66.99 6.6
 0 18 1 72.29 6.2
 -1 -18 -1 222.98 12.6
 -1 -18 -1 227.38 12.1
 -2 -18 -1 57.09 9.3
 -2 -18 -1 60.59 8.3
 -2 -18 -1 58.39 10
 -3 -18 -1 192.48 11.9
 -3 -18 -1 176.88 10.4
 -3 -18 -1 228.18 12.5
 -4 -18 -1 37.8 6.3
 -4 -18 -1 25.3 6.5
 -4 -18 -1 32.3 6.3
 -5 -18 -1 59.09 9.1
 -5 -18 -1 71.09 10.3
 -5 -18 -1 68.49 11
 -6 -18 -1 10.5 6.1
 -6 -18 -1 4.8 6.3
 -6 -18 -1 15.8 6.2
 -7 -18 -1 0.1 6.1
 -7 -18 -1 -1.1 6.4
 -7 -18 -1 -3.4 5.9
 -8 -18 -1 67.89 10.1
 -8 -18 -1 82.89 12.3
 -8 -18 -1 79.69 11.7
 -9 -18 -1 45.3 7.8
 -9 -18 -1 72.69 12.4
 -9 -18 -1 63.09 8.2
 6 -19 -1 40.9 7.9
 -6 19 1 38.8 5.1
 -6 19 1 34.6 4.9
 5 -19 -1 143.59 13.4
 -5 19 1 129.09 8.4
 -5 19 1 116.89 8.5
 4 -19 -1 162.18 13.2
 -4 19 1 138.89 8.4
 -4 19 1 155.78 8.4
 3 -19 -1 130.19 11.4
 3 -19 -1 126.89 12.4
 -3 19 1 120.39 7.7
 -3 19 1 124.19 7.6
 2 -19 -1 36.2 6.9
 2 -19 -1 39.4 7.4
 -2 19 1 40.4 6.5
 -2 19 1 41 6.1
 1 -19 -1 -0.1 6.1
 1 -19 -1 9.3 6.2
 0 -19 -1 82.89 11.8
 0 -19 -1 82.29 10.5
 -1 -19 -1 22.3 6.6
 -1 -19 -1 11.1 6.4
 -2 -19 -1 74.59 11
 -2 -19 -1 77.59 10.6
 -3 -19 -1 175.48 13.2
 -3 -19 -1 140.39 10.3
 -3 -19 -1 154.18 11.8
 -4 -19 -1 100.49 11.4
 -4 -19 -1 93.89 9.9
 -4 -19 -1 130.19 11.8
 -5 -19 -1 136.49 12
 -5 -19 -1 124.19 10.7
 -5 -19 -1 138.79 12.2
 -6 -19 -1 58.69 11.3
 -6 -19 -1 44.1 7.3
 -6 -19 -1 66.19 12.1
 -7 -19 -1 28.4 7.7
 -7 -19 -1 31.4 7.4
 -7 -19 -1 32.9 7.5
 3 -20 -1 145.79 12.5
 3 -20 -1 143.59 13.6
 2 -20 -1 38.5 7.4
 2 -20 -1 31.2 7.6
 1 -20 -1 20.8 7.3
 1 -20 -1 16.8 6.9
 0 -20 -1 29.1 7.3
 0 -20 -1 30.1 7.4
 -1 -20 -1 12.9 6.9
 -1 -20 -1 -0.4 6.5
 -2 -20 -1 62.89 11.7
 -2 -20 -1 57.29 8.2
 -3 -20 -1 91.39 12.8
 -3 -20 -1 75.29 9.8
 -3 -20 -1 78.49 11.5
 -4 -20 -1 167.68 11.6
 -4 -20 -1 201.68 13.9
 -4 -20 -1 203.68 14
 -5 -19 2 112.39 13.2
 -5 -19 2 100.99 12.8
 -5 -19 2 111.99 10.2
 -4 -19 2 44.8 8
 -4 -19 2 49.9 7
 -4 -19 2 63.49 11.4
 -3 -19 2 7.5 7
 -3 -19 2 4.6 6.6
 -3 -19 2 -4.9 5.5
 -2 -19 2 4.7 6.6
 -2 -19 2 -7.2 6.2
 -1 -19 2 136.19 12.7
 -1 -19 2 137.29 13.2
 0 19 -2 243.68 9.9
 0 19 -2 203.68 13.2
 0 -19 2 222.18 14.1
 0 -19 2 240.08 14.2
 -1 19 -2 160.08 8.2
 -1 19 -2 150.08 8.2
 1 -19 2 160.98 12.3
 1 -19 2 173.48 13.8
 -2 19 -2 108.89 7.6
 -2 19 -2 106.19 7.8
 2 -19 2 113.19 11.7
 2 -19 2 124.09 13.1
 -3 19 -2 8.8 3.9
 -3 19 -2 13.9 4.1
 3 -19 2 12.4 7.2
 3 -19 2 18.8 6.8
 -4 19 -2 71.39 7.6
 -4 19 -2 62.49 8
 4 -19 2 63.49 11.1
 4 -19 2 67.89 12.2
 -7 -18 2 26.5 7.9
 -7 -18 2 29.2 7.1
 -7 -18 2 21.5 7
 -6 -18 2 175.28 13.8
 -6 -18 2 197.58 12.8
 -6 -18 2 184.08 11.4
 -5 -18 2 140.59 12.5
 -5 -18 2 140.89 12.2
 -5 -18 2 126.89 10
 -4 -18 2 178.78 12.5
 -4 -18 2 170.98 10.4
 -4 -18 2 173.08 12.5
 3 18 -2 43.8 6.6
 -3 -18 2 33.9 7
 -3 -18 2 44.9 6.3
 -3 -18 2 36.1 7
 2 18 -2 0.1 2.8
 -2 -18 2 -3.9 4.9
 -2 -18 2 7 6.3
 -2 -18 2 2.9 5.8
 1 18 -2 32.4 5.8
 -1 -18 2 28.9 6.7
 -1 -18 2 36.9 6.8
 0 18 -2 135.19 7.4
 0 18 -2 146.49 7.6
 0 -18 2 132.09 11.7
 0 -18 2 140.19 11.2
 -1 18 -2 217.58 9.1
 -1 18 -2 217.68 9
 1 -18 2 230.88 13.4
 1 -18 2 222.88 12.6
 -2 18 -2 85.69 6.9
 -2 18 -2 94.19 7.1
 2 -18 2 78.19 10.5
 2 -18 2 102.29 12.2
 -3 18 -2 92.79 7.2
 -3 18 -2 112.49 7.8
 3 -18 2 100.89 11.7
 3 -18 2 109.19 10.9
 -4 18 -2 116.89 7.8
 -4 18 -2 128.79 8.5
 4 -18 2 123.99 12.7
 4 -18 2 127.59 11.8
 -5 18 -2 175.18 9.6
 -5 18 -2 157.48 8.9
 5 -18 2 162.78 13.3
 -6 18 -2 44 7.9
 -6 18 -2 39.6 5.2
 6 -18 2 30.3 7.6
 9 17 -2 13.5 5.5
 -9 -17 2 8.8 7.3
 -9 -17 2 11.9 7.6
 -9 -17 2 8.7 6.5
 8 17 -2 47.3 7.2
 -8 -17 2 32.5 6.9
 -8 -17 2 40.8 8
 -8 -17 2 41.1 7.4
 7 17 -2 133.09 7.9
 -7 -17 2 118.59 10.5
 -7 -17 2 139.69 12.7
 -7 -17 2 136.49 12.2
 6 17 -2 64.79 6.5
 -6 -17 2 64.69 9.1
 -6 -17 2 79.29 10.3
 -6 -17 2 71.99 10.7
 5 17 -2 314.27 10.8
 -5 -17 2 341.17 14.9
 -5 -17 2 358.76 15.1
 -5 -17 2 324.47 13
 4 17 -2 91.49 6.2
 -4 -17 2 97.99 10.4
 -4 -17 2 86.19 8.5
 -4 -17 2 99.49 10.5
 3 17 -2 156.28 7.2
 -3 -17 2 166.08 11.3
 -3 -17 2 172.68 11.5
 -3 -17 2 150.08 9.2
 2 17 -2 0.6 2.8
 -2 -17 2 4 5.4
 -2 -17 2 7.2 5.7
 -2 -17 2 -0.4 4.7
 1 17 -2 0.1 2.7
 -1 -17 2 -3.1 4.4
 -1 -17 2 -0.8 5.5
 -1 -17 2 0.1 5.3
 0 17 -2 15.3 3.2
 0 -17 2 22.7 6
 0 -17 2 20.4 5.8
 -1 17 -2 165.28 7.7
 -1 17 -2 169.08 7.9
 1 -17 2 158.98 11.7
 1 -17 2 185.08 11.6
 -2 17 -2 119.49 7.2
 -2 17 -2 125.29 7.4
 2 -17 2 127.89 11.5
 2 -17 2 137.39 10.4
 -3 17 -2 127.39 7.3
 -3 17 -2 123.39 7.6
 3 -17 2 129.99 11
 3 -17 2 128.39 11.5
 -4 17 -2 225.68 9.9
 -4 17 -2 214.18 9.3
 4 -17 2 235.48 12.7
 4 -17 2 219.68 13.2
 -5 17 -2 210.18 10
 -5 17 -2 212.98 9.4
 5 -17 2 215.88 13.5
 -6 17 -2 71.19 8.2
 -6 17 -2 93.79 7.8
 6 -17 2 83.99 11.5
 -7 17 -2 13.4 4.4
 -7 17 -2 22.2 4.6
 7 -17 2 14.9 6.8
 -8 17 -2 88.09 8.6
 -8 17 -2 86.39 9.1
 8 -17 2 81.99 12.3
 10 16 -2 17.6 5
 -10 -16 2 20.9 7.8
 -10 -16 2 28 7.8
 9 16 -2 9.2 4.2
 -9 -16 2 6.5 7.1
 -9 -16 2 4.4 6.8
 -9 -16 2 6.4 6.1
 8 16 -2 49 7.5
 -8 -16 2 37.7 6.6
 -8 -16 2 38.8 6.9
 -8 -16 2 32.4 7.4
 7 16 -2 47.6 6.4
 -7 -16 2 37.2 6.5
 -7 -16 2 30.6 7
 -7 -16 2 39.6 6.7
 6 16 -2 186.48 8.4
 -6 -16 2 181.18 10.4
 -6 -16 2 209.88 11.6
 -6 -16 2 191.18 11.9
 5 16 -2 43.3 5.7
 -5 -16 2 46.5 7.9
 -5 -16 2 53.09 9.2
 -5 -16 2 51.59 9.4
 4 16 -2 452.85 13.2
 -4 -16 2 480.95 16.5
 -4 -16 2 467.35 16.4
 -4 -16 2 463.35 14.8
 3 16 -2 161.08 7.2
 -3 -16 2 166.08 10.6
 -3 -16 2 176.08 10.7
 -3 -16 2 163.58 8.9
 2 16 -2 221.08 8.2
 -2 -16 2 235.28 11.5
 -2 -16 2 243.78 12.2
 -2 -16 2 216.68 9.9
 1 16 -2 0.9 2.6
 -1 -16 2 4.5 5
 -1 -16 2 3.7 4.3
 -1 -16 2 1.1 4.8
 0 16 -2 2.2 2.7
 0 -16 2 1.2 4.8
 0 -16 2 6.8 5
 -1 16 -2 181.28 7.8
 1 -16 2 179.08 11
 1 -16 2 175.28 10.4
 -2 16 -2 165.38 7.5
 -2 16 -2 163.08 7.8
 2 -16 2 177.38 10.4
 2 -16 2 178.68 11
 -3 16 -2 186.38 8.3
 -3 16 -2 191.48 8.6
 3 -16 2 213.48 11.2
 3 -16 2 213.78 11.9
 -4 16 -2 233.38 9.7
 -4 16 -2 229.28 9.1
 4 -16 2 225.48 12.4
 4 -16 2 248.08 12
 -5 16 -2 159.68 8.8
 -5 16 -2 176.08 8.2
 5 -16 2 167.38 10.7
 5 -16 2 157.78 11.6
 -6 16 -2 213.98 10.2
 -6 16 -2 227.18 9.6
 6 -16 2 225.88 13.1
 -7 16 -2 65.89 7.9
 -7 16 -2 55.19 7.3
 7 -16 2 64.59 11.3
 -8 16 -2 0.7 4.1
 -8 16 -2 1.2 4.2
 8 -16 2 0.8 6.1
 -9 16 -2 51.99 7.9
 -9 16 -2 70.19 9.1
 9 -16 2 46.2 7.8
 11 15 -2 260.67 12.7
 -11 -15 2 278.17 15.2
 -11 -15 2 255.07 14.2
 10 15 -2 92.79 9.5
 -10 -15 2 95.19 11.9
 -10 -15 2 82.09 10.5
 9 15 -2 7.3 4.5
 -9 -15 2 13.6 6.6
 -9 -15 2 8.8 6.7
 -9 -15 2 8.5 5.5
 8 15 -2 3 3.8
 -8 -15 2 9.8 6.3
 -8 -15 2 9.1 5.3
 -8 -15 2 5.2 6.1
 7 15 -2 88.19 7.1
 -7 -15 2 93.79 9.9
 -7 -15 2 77.69 8.5
 -7 -15 2 85.39 10.2
 6 15 -2 105.49 6.6
 -6 -15 2 93.59 9.6
 -6 -15 2 91.39 8.6
 -6 -15 2 99.39 10
 5 15 -2 194.68 8
 -5 -15 2 191.68 9.7
 -5 -15 2 219.68 11.2
 -5 -15 2 210.98 10.9
 4 15 -2 292.57 9.7
 -4 -15 2 298.17 11
 -4 -15 2 294.07 12.3
 -4 -15 2 308.77 12.8
 3 15 -2 226.88 8.1
 -3 -15 2 235.88 11
 -3 -15 2 219.48 9.4
 -3 -15 2 220.88 10.9
 2 15 -2 305.77 9.7
 -2 -15 2 316.87 12.3
 -2 -15 2 307.57 10.9
 -2 -15 2 317.37 12.7
 1 15 -2 7.9 2.7
 -1 -15 2 11.9 4.6
 -1 -15 2 13.6 4.2
 -1 -15 2 11.2 4.6
 0 15 -2 9.3 2.7
 0 -15 2 9.4 4.6
 0 -15 2 8.3 4.6
 -1 15 -2 34.4 5.1
 1 -15 2 27 5.2
 1 -15 2 38.6 7.5
 -2 15 -2 41.9 5.4
 -2 15 -2 37.5 5.1
 2 -15 2 44.8 8.2
 2 -15 2 25.5 5
 -3 15 -2 105.69 6.2
 -3 15 -2 98.49 6.6
 3 -15 2 113.79 9.4
 3 -15 2 97.79 8.6
 -4 15 -2 251.07 9.8
 -4 15 -2 259.67 9.5
 4 -15 2 284.77 12.7
 4 -15 2 277.97 11.7
 -5 15 -2 271.57 10.4
 -5 15 -2 258.47 9.6
 5 -15 2 286.97 12
 5 -15 2 270.97 12.9
 -6 15 -2 279.07 10.4
 -6 15 -2 291.47 11.2
 6 -15 2 296.77 13.9
 -7 15 -2 182.78 9.6
 -7 15 -2 169.78 8.8
 7 -15 2 191.48 12.2
 -8 15 -2 27.9 4.8
 -8 15 -2 33.6 4.8
 8 -15 2 36.7 6.8
 -9 15 -2 32.6 5
 -9 15 -2 29.1 5.1
 9 -15 2 32.2 6.9
 -10 15 -2 72.79 8.1
 -10 15 -2 62.59 9.3
 10 -15 2 64.99 11.4
 12 14 -2 167.68 10.9
 -12 -14 2 166.08 14.2
 -12 -14 2 147.49 12.4
 11 14 -2 155.98 10.1
 -11 -14 2 147.89 11.6
 -11 -14 2 154.78 12.9
 10 14 -2 287.37 12
 -10 -14 2 276.47 14.3
 -10 -14 2 297.57 13.6
 9 14 -2 61.29 8.1
 -9 -14 2 61.29 10.3
 -9 -14 2 74.29 9.7
 -9 -14 2 63.99 9.3
 8 14 -2 -0.4 3.8
 -8 -14 2 0.7 4.7
 -8 -14 2 4.8 5.7
 -8 -14 2 9.8 5.5
 7 14 -2 19.3 3.8
 -7 -14 2 22.6 5.4
 -7 -14 2 22.4 5.2
 -7 -14 2 23.5 5.7
 6 14 -2 50.19 5.9
 -6 -14 2 47.3 7.7
 -6 -14 2 49.1 7.2
 -6 -14 2 53.39 8.6
 5 14 -2 293.57 9.8
 -5 -14 2 307.67 11.3
 -5 -14 2 328.27 12.6
 -5 -14 2 314.57 12.5
 4 14 -2 136.69 6.5
 -4 -14 2 148.49 8
 -4 -14 2 135.89 8.9
 -4 -14 2 154.48 9
 3 14 -2 470.55 13
 -3 -14 2 481.85 14
 -3 -14 2 501.65 15.5
 -3 -14 2 464.45 14.9
 2 14 -2 194.78 7.2
 -2 -14 2 202.78 9.8
 -2 -14 2 202.48 9.7
 -2 -14 2 202.88 8.4
 1 14 -2 80.39 5.1
 -1 -14 2 81.49 7.6
 -1 -14 2 88.99 6.6
 -1 -14 2 91.79 7.7
 0 14 -2 26.3 4.5
 0 -14 2 18 4.4
 0 -14 2 16.8 4.4
 0 -14 2 22.9 3.9
 -1 14 -2 0.5 2.3
 1 -14 2 4.2 4.1
 1 -14 2 5.3 4
 -4 14 -2 287.37 10.2
 -4 14 -2 291.97 9.8
 4 -14 2 326.87 12.8
 4 -14 2 321.37 11.9
 -5 14 -2 357.16 11.9
 -5 14 -2 361.26 11.3
 5 -14 2 377.26 14.2
 5 -14 2 373.46 13.1
 -6 14 -2 350.46 11.3
 -6 14 -2 337.47 12
 6 -14 2 367.66 14.2
 -7 14 -2 262.77 10
 -7 14 -2 272.47 10.8
 7 -14 2 263.27 12.8
 -8 14 -2 94.69 7.5
 -8 14 -2 93.79 8.1
 8 -14 2 105.69 10.3
 -9 14 -2 3.9 3.8
 -9 14 -2 -2.4 4
 9 -14 2 -6.2 5.5
 -10 14 -2 37.4 5.6
 -10 14 -2 49.6 7.4
 10 -14 2 29.8 6.8
 -11 14 -2 34.8 5.8
 -11 14 -2 52.09 7.9
 11 -14 2 35.6 7
 13 13 -2 61.39 9.6
 -13 -13 2 63.29 8.9
 -13 -13 2 55.89 8.9
 12 13 -2 182.38 10.8
 -12 -13 2 190.58 12.6
 -12 -13 2 198.58 14.1
 11 13 -2 227.68 10.8
 -11 -13 2 212.38 12.8
 -11 -13 2 230.58 13.5
 10 13 -2 127.29 8.6
 -10 -13 2 125.89 10.3
 -10 -13 2 120.19 11.7
 9 13 -2 117.39 8.2
 -9 -13 2 124.39 10.7
 -9 -13 2 151.08 9.7
 -9 -13 2 122.39 10.1
 8 13 -2 20.4 4
 -8 -13 2 21.1 5.7
 -8 -13 2 18 4.8
 -8 -13 2 33.7 5.8
 7 13 -2 4.9 3.4
 -7 -13 2 14.5 5.1
 -7 -13 2 5.6 4.7
 -7 -13 2 12.9 4.4
 5 13 -2 127.29 6.3
 -5 -13 2 106.29 8.5
 -5 -13 2 137.69 8.2
 -5 -13 2 112.69 7.5
 4 13 -2 83.59 5.3
 -4 -13 2 100.09 7.4
 -4 -13 2 89.59 6.7
 -4 -13 2 91.99 7.7
 3 13 -2 336.07 10.2
 -3 -13 2 348.57 12.2
 -3 -13 2 379.86 12.5
 -3 -13 2 353.96 11.2
 2 13 -2 234.68 7.9
 -2 -13 2 259.87 10.2
 -2 -13 2 247.48 9.7
 -2 -13 2 243.48 8.9
 1 13 -2 449.56 12.3
 -1 -13 2 466.15 14.1
 -1 -13 2 456.85 14.4
 -1 -13 2 452.55 12.9
 0 13 -2 120.09 5.7
 0 -13 2 121.89 6.5
 0 -13 2 117.19 7.9
 0 -13 2 128.39 7.6
 -1 13 -2 14.5 2.6
 1 -13 2 18.6 4
 1 -13 2 4.6 3.7
 -2 13 -2 0.6 2.3
 2 -13 2 3.3 3.7
 2 -13 2 5 3.7
 -3 13 -2 20.3 3
 -3 13 -2 31 4.6
 3 -13 2 21.8 4.2
 3 -13 2 24.4 4.5
 -4 13 -2 129.69 6.9
 -4 13 -2 130.89 6.4
 4 -13 2 145.29 8.2
 4 -13 2 145.79 9
 -5 13 -2 171.08 7.4
 -5 13 -2 184.98 8.2
 5 -13 2 191.88 10.1
 5 -13 2 180.28 9
 -6 13 -2 311.77 10.3
 -6 13 -2 314.67 11.1
 6 -13 2 322.77 13.2
 -7 13 -2 510.95 15.3
 -7 13 -2 497.85 14.5
 7 -13 2 513.05 17
 -8 13 -2 201.78 9
 -8 13 -2 211.28 9.9
 8 -13 2 221.98 11.6
 -9 13 -2 22.8 4.1
 -9 13 -2 13.7 4.2
 9 -13 2 2.3 5.2
 -10 13 -2 11.7 4.5
 -10 13 -2 15.8 4.3
 10 -13 2 6 5.8
 -11 13 -2 82.09 9.4
 -11 13 -2 65.99 8
 11 -13 2 67.49 10.6
 -12 13 -2 83.99 10
 -12 13 -2 74.79 8.7
 12 -13 2 75.89 11.6
 13 12 -2 54.69 9
 -13 -12 2 43 8
 -13 -12 2 51.09 8.2
 12 12 -2 95.79 8.8
 -12 -12 2 102.19 11.6
 -12 -12 2 105.09 11.3
 11 12 -2 152.88 9.3
 -11 -12 2 158.98 11.8
 -11 -12 2 155.38 10.8
 10 12 -2 87.99 7.7
 -10 -12 2 80.39 10.1
 -10 -12 2 73.89 9
 9 12 -2 197.58 8.9
 -9 -12 2 192.88 10
 -9 -12 2 195.28 11.7
 -9 -12 2 194.98 10.3
 8 12 -2 15.2 3.5
 -8 -12 2 17.8 4.3
 -8 -12 2 16.6 5.2
 -8 -12 2 15.5 5.2
 7 12 -2 38.4 5.8
 -7 -12 2 32.6 5.3
 -7 -12 2 47.6 7.1
 -7 -12 2 43.2 6.8
 6 12 -2 23.8 3.4
 -6 -12 2 23.8 4.7
 -6 -12 2 23.1 4.2
 -6 -12 2 27.6 4.6
 5 12 -2 2.9 2.6
 -5 -12 2 3.3 3.9
 -5 -12 2 1.6 3.4
 -5 -12 2 -2.7 3.7
 4 12 -2 151.48 6.4
 -4 -12 2 142.49 7.3
 -4 -12 2 170.08 8.1
 -4 -12 2 159.68 8.4
 3 12 -2 400.86 11.5
 -3 -12 2 446.96 13.4
 -3 -12 2 424.06 12.2
 -3 -12 2 432.06 13.3
 2 12 -2 299.07 9.1
 -2 -12 2 319.87 10.9
 -2 -12 2 321.27 10.8
 -2 -12 2 306.47 9.7
 1 12 -2 278.47 8.5
 -1 -12 2 295.77 10.4
 -1 -12 2 280.67 9.1
 -1 -12 2 282.67 10.1
 0 12 -2 14.3 2.3
 0 -12 2 17.6 3.7
 0 -12 2 12.5 3.6
 0 -12 2 11.8 3.1
 -1 12 -2 51.89 4.3
 1 -12 2 52.39 6.2
 1 -12 2 47.2 5.9
 -2 12 -2 14.8 2.6
 2 -12 2 23.2 3.8
 2 -12 2 16 3.9
 -3 12 -2 148.89 6.5
 -3 12 -2 150.98 6.3
 3 -12 2 147.59 8.3
 3 -12 2 156.48 7.9
 -4 12 -2 15.9 2.9
 -4 12 -2 14.3 2.7
 4 -12 2 14.9 3.7
 4 -12 2 10.2 4
 -5 12 -2 224.48 8.6
 -5 12 -2 201.88 7.8
 5 -12 2 231.28 9.3
 5 -12 2 222.88 10.2
 -6 12 -2 306.57 10.6
 -6 12 -2 304.07 9.8
 6 -12 2 307.57 12.2
 -7 12 -2 913.91 23.6
 -7 12 -2 892.81 22.8
 7 -12 2 918.91 24.8
 -8 12 -2 339.87 11.3
 -8 12 -2 347.77 12.3
 8 -12 2 358.86 13.6
 -9 12 -2 173.68 8.5
 -9 12 -2 189.48 9.6
 9 -12 2 176.68 10.9
 -10 12 -2 8.1 3.7
 -10 12 -2 8.6 4.2
 10 -12 2 13.7 5.4
 -11 12 -2 3.5 4.5
 -11 12 -2 -5.1 3.8
 11 -12 2 -2.6 5.2
 -12 12 -2 28.8 5.5
 -12 12 -2 26.7 5
 12 -12 2 32.6 6.6
 -13 12 -2 59.99 8.6
 -13 12 -2 67.49 10.2
 13 -12 2 63.29 11.3
 14 11 -2 3.7 5.1
 -14 -11 2 -3.2 7.2
 -14 -11 2 4.4 6.9
 13 11 -2 1.2 4.6
 -13 -11 2 -4.6 6.6
 -13 -11 2 -7.2 6.3
 12 11 -2 198.88 10.3
 -12 -11 2 199.48 13
 -12 -11 2 201.38 11.7
 11 11 -2 57.69 7.4
 -11 -11 2 61.19 9.1
 -11 -11 2 53.09 9.7
 10 11 -2 164.38 8.5
 -10 -11 2 161.18 10.6
 -10 -11 2 154.78 9.8
 9 11 -2 75.79 6.7
 -9 -11 2 95.59 9.1
 -9 -11 2 82.79 8.4
 8 11 -2 404.86 12.2
 -8 -11 2 400.46 14.1
 -8 -11 2 402.76 13.2
 -8 -11 2 411.86 13.4
 7 11 -2 96.49 6.2
 -7 -11 2 99.49 7.4
 -7 -11 2 98.29 7.6
 -7 -11 2 79.29 7
 6 11 -2 79.39 5.6
 -6 -11 2 82.99 7.3
 -6 -11 2 78.39 6.4
 -6 -11 2 75.89 6.3
 5 11 -2 7.7 2.6
 -5 -11 2 12.2 3.7
 -5 -11 2 8.1 3.8
 -5 -11 2 10.9 3.4
 4 11 -2 131.69 5.9
 -4 -11 2 132.69 7.4
 -4 -11 2 130.69 6.4
 -4 -11 2 135.99 7.1
 3 11 -2 239.18 7.8
 -3 -11 2 252.37 8.4
 -3 -11 2 249.48 9.4
 -3 -11 2 262.97 9.3
 2 11 -2 632.94 16.2
 -2 -11 2 670.73 16.7
 -2 -11 2 671.03 17.7
 -2 -11 2 652.33 17.5
 1 11 -2 405.96 10.9
 -1 -11 2 435.96 12.7
 -1 -11 2 401.86 11.3
 -1 -11 2 393.06 12
 0 11 -2 53.89 4
 0 -11 2 52.29 4
 0 -11 2 61.29 5.7
 0 -11 2 59.79 5.5
 0 -11 2 60.39 4.4
 -1 11 -2 291.67 8.6
 1 -11 2 286.37 8.8
 1 -11 2 291.47 9.7
 1 -11 2 287.97 8.2
 1 -11 2 293.87 10.2
 -2 11 -2 8.6 2.2
 2 -11 2 12.8 2.2
 2 -11 2 14.3 3.3
 2 -11 2 9.7 3.3
 -3 11 -2 73.49 4.8
 3 -11 2 65.49 4.6
 3 -11 2 72.29 6.4
 3 -11 2 65.09 5.6
 -4 11 -2 14.9 2.7
 -4 11 -2 16.6 2.5
 4 -11 2 12.9 2.6
 4 -11 2 15.2 3.4
 4 -11 2 14.8 3.7
 -5 11 -2 57.59 4.7
 -5 11 -2 58.09 5.4
 5 -11 2 63.79 5.9
 5 -11 2 60.89 6.7
 5 -11 2 48.8 5.1
 -6 11 -2 193.18 7.3
 -6 11 -2 178.38 8
 6 -11 2 180.18 7.5
 6 -11 2 179.18 9.2
 -7 11 -2 603.74 15.9
 -7 11 -2 601.14 16.8
 7 -11 2 588.24 17.8
 7 -11 2 593.14 16.1
 -8 11 -2 250.87 9.2
 -8 11 -2 252.67 10.1
 8 -11 2 251.77 11.3
 8 -11 2 244.18 9.6
 -9 11 -2 47.8 7
 -9 11 -2 50.59 6.2
 9 -11 2 51.29 6.6
 9 -11 2 61.09 8.2
 -10 11 -2 41.9 7.6
 -10 11 -2 56.59 6.4
 10 -11 2 50.19 8.6
 10 -11 2 48.4 7.1
 -11 11 -2 43.2 5.6
 -11 11 -2 45.9 7
 11 -11 2 35.8 6.2
 11 -11 2 40 7.5
 -12 11 -2 37.8 5.7
 -12 11 -2 31.5 5.1
 12 -11 2 24.9 6.3
 -13 11 -2 26.9 5.7
 -13 11 -2 32.7 5.2
 13 -11 2 26.4 6.5
 -14 11 -2 102.59 11.3
 -14 11 -2 127.39 9.5
 14 -11 2 112.59 11.6
 15 10 -2 6.5 5.5
 14 10 -2 107.69 10.1
 -14 -10 2 112.69 12.6
 -14 -10 2 100.29 11.6
 13 10 -2 5.3 4.5
 -13 -10 2 3.4 6.3
 -13 -10 2 -3.3 6.5
 12 10 -2 16.2 4.4
 -12 -10 2 5.7 6.2
 -12 -10 2 22.7 6.3
 11 10 -2 80.89 7.6
 -11 -10 2 78.79 9.7
 -11 -10 2 91.49 9.1
 10 10 -2 75.99 6.9
 -10 -10 2 78.59 9
 -10 -10 2 64.39 8.2
 9 10 -2 74.39 6.3
 -9 -10 2 64.79 7.4
 -9 -10 2 64.59 8.4
 8 10 -2 79.99 5.9
 -8 -10 2 87.19 7.3
 -8 -10 2 78.59 6.7
 -8 -10 2 87.99 7
 7 10 -2 108.29 6
 -7 -10 2 108.09 7.6
 -7 -10 2 108.49 7
 -7 -10 2 107.49 7.2
 6 10 -2 651.13 16.5
 -6 -10 2 639.54 17.4
 -6 -10 2 656.13 17.1
 -6 -10 2 643.14 17.9
 5 10 -2 80.29 5
 -5 -10 2 73.09 6.4
 -5 -10 2 82.79 6
 -5 -10 2 71.39 5.5
 4 10 -2 22.3 4.1
 -4 -10 2 17.6 3.3
 -4 -10 2 23 4.6
 -4 -10 2 23.7 3.7
 -4 -10 2 19.6 3.4
 3 10 -2 13.3 2.2
 -3 -10 2 8.7 1.8
 -3 -10 2 15 3
 -3 -10 2 13.8 3.2
 -3 -10 2 15 2.9
 2 10 -2 674.73 17.2
 2 10 -2 688.13 18.5
 -2 -10 2 739.23 18.4
 -2 -10 2 711.03 17.5
 -2 -10 2 721.73 18.4
 -2 -10 2 713.03 16.7
 1 10 -2 366.06 9.9
 1 10 -2 370.06 10.2
 -1 -10 2 373.26 10.2
 -1 -10 2 370.16 9.4
 -1 -10 2 381.16 11.2
 -1 -10 2 364.16 11
 0 10 -2 358.66 9.8
 0 10 -2 365.86 9.6
 0 -10 2 338.87 10.5
 0 -10 2 349.96 10.9
 0 -10 2 359.16 9.2
 0 -10 2 342.47 9.7
 -1 10 -2 274.57 8.1
 -1 10 -2 248.38 7.7
 1 -10 2 255.57 9.1
 1 -10 2 267.57 8.7
 1 -10 2 257.47 7.8
 1 -10 2 262.37 7.5
 1 -10 2 268.87 8.3
 -2 10 -2 178.68 6.2
 -2 10 -2 181.88 6.4
 2 -10 2 174.28 6.4
 2 -10 2 177.38 7.7
 2 -10 2 180.18 6
 2 -10 2 172.28 7
 -3 10 -2 28.7 3.6
 -3 10 -2 22.2 3.7
 3 -10 2 27 4.5
 3 -10 2 24.5 3.7
 3 -10 2 22.6 3.4
 -4 10 -2 8.5 2.4
 -4 10 -2 7.1 2.5
 -4 10 -2 8.4 2.2
 4 -10 2 1.4 3
 4 -10 2 2.2 2.3
 4 -10 2 1.8 2.8
 -5 10 -2 3.8 2.5
 -5 10 -2 3.3 2.2
 -5 10 -2 7 2.8
 5 -10 2 7.6 3.3
 5 -10 2 2 2.4
 5 -10 2 4.6 2.8
 -6 10 -2 131.99 6.8
 -6 10 -2 147.89 7
 -6 10 -2 146.79 6.1
 6 -10 2 142.79 8
 6 -10 2 140.39 6.6
 -7 10 -2 288.87 10.1
 -7 10 -2 279.37 9.1
 7 -10 2 272.97 9.5
 7 -10 2 292.07 9.6
 7 -10 2 283.37 11.1
 -8 10 -2 344.67 11.9
 -8 10 -2 350.56 11.1
 8 -10 2 360.66 11.2
 8 -10 2 361.36 12.8
 8 -10 2 372.56 11.5
 -9 10 -2 43 6.7
 -9 10 -2 46.3 5.8
 9 -10 2 50.79 7.8
 9 -10 2 45.4 6.6
 9 -10 2 51.09 5.6
 -10 10 -2 126.79 7.5
 -10 10 -2 129.49 8.6
 10 -10 2 138.09 8.1
 10 -10 2 129.49 9.3
 -11 10 -2 94.09 8.6
 -11 10 -2 96.19 7.4
 11 -10 2 96.99 8.1
 11 -10 2 109.19 9.3
 -12 10 -2 80.29 9
 -12 10 -2 76.99 7.7
 12 -10 2 67.89 8.3
 12 -10 2 57.49 9.4
 -13 10 -2 17.2 4.7
 -13 10 -2 6.7 4.9
 13 -10 2 12.1 4.9
 13 -10 2 6.7 5.5
 -14 10 -2 32.2 6.2
 -14 10 -2 33.4 5.4
 14 -10 2 30 5.8
 14 -10 2 30.7 6.7
 15 9 -2 147.19 11.2
 -15 -9 2 152.98 12.6
 -15 -9 2 143.79 12.4
 14 9 -2 311.47 13.2
 -14 -9 2 308.07 14.3
 -14 -9 2 299.27 14.6
 13 9 -2 -1.9 4.2
 -13 -9 2 -1.9 5.8
 -13 -9 2 -1.5 3.9
 -13 -9 2 -6.3 6
 12 9 -2 0.1 3.9
 -12 -9 2 -5 5.5
 -12 -9 2 3.5 5.4
 -12 -9 2 7.3 3.8
 11 9 -2 130.89 8
 -11 -9 2 118.49 9.3
 -11 -9 2 127.79 10.3
 10 9 -2 6.5 3.2
 -10 -9 2 12.8 4.8
 -10 -9 2 12 4.8
 9 9 -2 123.59 6.8
 -9 -9 2 134.39 8.2
 -9 -9 2 128.39 8.7
 8 9 -2 62.79 5.4
 -8 -9 2 69.99 6
 -8 -9 2 61.69 6.5
 -8 -9 2 67.59 7.2
 7 9 -2 431.66 12
 -7 -9 2 427.86 13.3
 -7 -9 2 441.16 12.8
 -7 -9 2 439.66 15.2
 -7 -9 2 416.06 12.7
 6 9 -2 297.67 8.9
 -6 -9 2 307.07 9.8
 -6 -9 2 298.67 9.8
 -6 -9 2 310.67 10.5
 -6 -9 2 280.47 8.9
 5 9 -2 553.74 14.1
 -5 -9 2 536.95 13.9
 -5 -9 2 566.84 14.6
 -5 -9 2 558.04 15
 -5 -9 2 545.05 15.3
 4 9 -2 70.59 4.6
 4 9 -2 73.89 4.3
 -4 -9 2 64.09 3.6
 -4 -9 2 65.59 5.4
 -4 -9 2 63.39 4.9
 -4 -9 2 71.89 4.9
 3 9 -2 31.2 3.6
 3 9 -2 30.7 3.5
 -3 -9 2 18.9 2.8
 -3 -9 2 26.6 4.6
 -3 -9 2 22.7 3.9
 -3 -9 2 26.9 4.1
 2 9 -2 551.64 14.6
 2 9 -2 568.64 15
 -2 -9 2 624.24 15.7
 -2 -9 2 611.84 14.2
 -2 -9 2 610.44 14.9
 -2 -9 2 619.04 15.7
 1 9 -2 46 3.3
 1 9 -2 42.2 3.3
 -1 -9 2 47.7 3.6
 -1 -9 2 45.6 3
 -1 -9 2 47.6 4.3
 -1 -9 2 44.8 4.3
 0 9 -2 712.23 17
 0 9 -2 724.83 17.3
 0 -9 2 697.23 17.9
 0 -9 2 682.53 17.7
 0 -9 2 702.83 16.6
 0 -9 2 700.03 17
 -1 9 -2 220.18 6.7
 -1 9 -2 225.68 6.9
 1 -9 2 220.28 7.3
 1 -9 2 215.28 6.7
 1 -9 2 217.28 7.8
 1 -9 2 217.48 7.5
 1 -9 2 221.68 6.5
 -2 9 -2 397.86 10.6
 -2 9 -2 404.56 10.8
 2 -9 2 387.96 10.7
 2 -9 2 402.86 11.8
 2 -9 2 410.76 10.4
 2 -9 2 390.76 11.1
 -3 9 -2 571.74 14.4
 -3 9 -2 558.44 14.5
 3 -9 2 572.04 14.8
 3 -9 2 554.84 14.4
 3 -9 2 570.84 14.1
 3 -9 2 571.24 15.5
 -4 9 -2 311.77 9.3
 -4 9 -2 307.97 9.2
 -4 9 -2 310.57 8.8
 4 -9 2 312.77 9
 4 -9 2 301.27 10.1
 4 -9 2 304.97 9.4
 -5 9 -2 7.2 2.3
 -5 9 -2 6.6 2.6
 -5 9 -2 9.6 2.2
 5 -9 2 4.7 2.6
 5 -9 2 9.1 2.4
 5 -9 2 7.3 3
 -6 9 -2 84.59 5.6
 -6 9 -2 78.29 4.7
 -6 9 -2 89.99 5.6
 6 -9 2 81.69 5.4
 6 -9 2 87.29 5.3
 6 -9 2 86.09 6.4
 -7 9 -2 386.46 11.4
 -7 9 -2 399.56 12.1
 7 -9 2 399.76 11.6
 7 -9 2 406.46 11.8
 7 -9 2 409.26 13
 -8 9 -2 107.49 6.1
 -8 9 -2 102.59 6.8
 8 -9 2 107.99 6
 8 -9 2 102.59 7.5
 8 -9 2 104.69 6.5
 -9 9 -2 43.4 5.4
 -9 9 -2 42.9 6.3
 9 -9 2 51.29 6.2
 9 -9 2 36.8 7.2
 9 -9 2 44.8 5.1
 -10 9 -2 131.89 7.3
 -10 9 -2 138.19 8.4
 10 -9 2 140.59 9
 10 -9 2 145.49 8.1
 -11 9 -2 315.07 12.2
 -11 9 -2 291.67 10.8
 11 -9 2 320.97 11.6
 11 -9 2 307.07 12.7
 -12 9 -2 160.08 8.7
 -12 9 -2 164.58 10
 12 -9 2 152.28 10.2
 12 -9 2 165.08 9.6
 -13 9 -2 40.2 5.8
 -13 9 -2 49.1 7.2
 13 -9 2 32.9 5.5
 13 -9 2 36.2 6.2
 -14 9 -2 -0.2 4.3
 -14 9 -2 2 5.2
 14 -9 2 -2.5 5.5
 14 -9 2 -5.4 4.6
 -15 9 -2 71.29 9
 -15 9 -2 64.59 10.9
 15 -9 2 63.59 10.5
 15 -9 2 76.79 10.2
 15 -9 2 64.79 10.7
 15 8 -2 200.78 12
 -15 -8 2 203.18 13.9
 -15 -8 2 221.48 13.5
 -15 -8 2 217.98 12.5
 14 8 -2 109.69 9.7
 -14 -8 2 125.69 8.5
 -14 -8 2 113.59 11.6
 -14 -8 2 101.59 10.6
 13 8 -2 131.99 9.4
 -13 -8 2 136.19 10.8
 -13 -8 2 149.39 8.2
 -13 -8 2 133.19 11.1
 12 8 -2 -0.5 3.8
 -12 -8 2 8.2 5.4
 -12 -8 2 8.7 3.6
 -12 -8 2 8.7 5.3
 11 8 -2 68.19 7
 -11 -8 2 74.69 6.1
 -11 -8 2 57.49 7.9
 -11 -8 2 68.39 8.5
 10 8 -2 18.3 3.5
 -10 -8 2 11.6 4.6
 -10 -8 2 17.4 3.3
 -10 -8 2 16.8 4.8
 9 8 -2 71.69 5.7
 -9 -8 2 72.09 6.3
 -9 -8 2 78.79 6.7
 -9 -8 2 63.19 7.4
 -9 -8 2 68.09 5.3
 8 8 -2 308.87 9.8
 -8 -8 2 326.37 10.7
 -8 -8 2 321.07 9.8
 -8 -8 2 322.77 11.4
 7 8 -2 173.18 6.7
 -7 -8 2 182.88 7.3
 -7 -8 2 184.88 7.7
 -7 -8 2 179.18 6.8
 -7 -8 2 178.38 8.2
 6 8 -2 425.26 11.6
 -6 -8 2 438.36 11.9
 -6 -8 2 451.55 12.4
 -6 -8 2 445.06 13
 -6 -8 2 431.56 12.3
 5 8 -2 408.76 10.9
 -5 -8 2 415.76 11
 -5 -8 2 415.76 11.4
 -5 -8 2 411.76 12.1
 -5 -8 2 418.56 11.7
 4 8 -2 66.39 3.7
 -4 -8 2 62.99 5
 -4 -8 2 63.19 4.3
 -4 -8 2 60.49 4.4
 -4 -8 2 58.29 3.6
 3 8 -2 104.59 4.8
 3 8 -2 103.39 4.4
 -3 -8 2 93.59 5.3
 -3 -8 2 97.59 3.9
 -3 -8 2 92.29 4.7
 -3 -8 2 99.39 4.9
 2 8 -2 18 2.9
 2 8 -2 15.9 2.9
 -2 -8 2 19.4 2.4
 -2 -8 2 14.8 2.4
 -2 -8 2 24.4 4
 -2 -8 2 14.1 2.3
 1 8 -2 23.5 2.9
 1 8 -2 19.3 2.7
 -1 -8 2 22.8 3.6
 -1 -8 2 26.6 2.5
 -1 -8 2 22.1 3.8
 -1 -8 2 21.8 2.9
 0 8 -2 265.87 7.5
 0 8 -2 259.27 7.2
 0 -8 2 256.47 6.9
 0 -8 2 256.07 7.2
 0 -8 2 251.57 7.9
 0 -8 2 257.07 8.2
 -1 8 -2 15.4 2.7
 -1 8 -2 17.7 2.6
 1 -8 2 13.4 2.4
 1 -8 2 16.6 2.9
 1 -8 2 14 2.6
 1 -8 2 13.7 2.4
 1 -8 2 15.3 2.1
 -2 8 -2 1193.58 27.7
 -2 8 -2 1207.88 27.9
 2 -8 2 1229.68 28.6
 2 -8 2 1182.18 27.8
 2 -8 2 1170.98 28
 2 -8 2 1195.08 27.5
 -3 8 -2 232.98 7.3
 -3 8 -2 250.87 7.5
 3 -8 2 245.88 8.3
 3 -8 2 247.28 7.2
 3 -8 2 240.38 7.7
 3 -8 2 236.28 7.3
 -4 8 -2 523.75 13.2
 -4 8 -2 544.65 13.9
 -4 8 -2 519.55 13.6
 4 -8 2 528.05 14.6
 4 -8 2 528.35 13.5
 4 -8 2 537.35 13.8
 -5 8 -2 419.96 11.7
 -5 8 -2 404.76 11.5
 -5 8 -2 408.86 11
 5 -8 2 413.66 12.4
 5 -8 2 428.56 11.3
 5 -8 2 413.96 11.4
 -6 8 -2 5 2.1
 -6 8 -2 5 2.6
 -6 8 -2 6.4 2.4
 6 -8 2 6.5 2.4
 6 -8 2 7.4 2.9
 6 -8 2 6.9 2.3
 -7 8 -2 5.6 2.4
 -7 8 -2 8.7 2.8
 7 -8 2 6.6 2.4
 7 -8 2 4.4 3.1
 7 -8 2 4.5 2.5
 -8 8 -2 51.09 5.7
 -8 8 -2 48.6 4.9
 8 -8 2 57.59 6.4
 8 -8 2 57.49 4.7
 8 -8 2 61.89 5.5
 -9 8 -2 272.77 9.2
 -9 8 -2 265.47 10.2
 9 -8 2 272.07 9
 9 -8 2 286.97 9.9
 -10 8 -2 431.76 12.7
 -10 8 -2 436.06 14.1
 10 -8 2 437.86 12.6
 10 -8 2 446.56 13.7
 -11 8 -2 264.87 9.6
 -11 8 -2 237.78 10.8
 11 -8 2 261.37 10.5
 -12 8 -2 219.38 10.9
 -12 8 -2 236.38 9.7
 12 -8 2 235.88 10.5
 -13 8 -2 86.19 9.3
 -13 8 -2 75.39 7.7
 13 -8 2 86.99 8.8
 -14 8 -2 24.9 5.8
 -14 8 -2 34.1 5.1
 14 -8 2 20.6 5.4
 -15 8 -2 22.1 5.2
 -15 8 -2 17.9 5.9
 15 -8 2 19.9 5.6
 15 -8 2 15.1 5.7
 16 7 -2 41.1 6.6
 -16 -7 2 42 7.8
 -16 -7 2 67.39 10.6
 -16 -7 2 57.59 8.6
 15 7 -2 104.59 10.4
 -15 -7 2 104.99 11.7
 -15 -7 2 126.79 8.7
 -15 -7 2 116.09 11.3
 14 7 -2 172.98 10.6
 -14 -7 2 187.68 9
 -14 -7 2 163.18 11.3
 -14 -7 2 168.48 12.1
 13 7 -2 87.19 8.5
 -13 -7 2 86.59 9.9
 -13 -7 2 88.29 7
 -13 -7 2 79.99 9.2
 12 7 -2 179.08 9.2
 -12 -7 2 198.58 10.7
 -12 -7 2 195.28 8.1
 11 7 -2 53.49 6.7
 -11 -7 2 60.49 5.6
 -11 -7 2 59.39 7.8
 10 7 -2 66.19 6
 -10 -7 2 62.99 5.1
 -10 -7 2 61.49 5.8
 -10 -7 2 54.89 7.3
 -10 -7 2 65.99 6.9
 9 7 -2 13.4 2.9
 -9 -7 2 8.6 2.7
 -9 -7 2 16.6 2.8
 -9 -7 2 14.7 4
 -9 -7 2 14 4.1
 8 7 -2 387.16 11.1
 -8 -7 2 373.76 12.3
 -8 -7 2 384.16 10.6
 -8 -7 2 397.36 11
 -8 -7 2 377.96 11.7
 7 7 -2 190.38 6.6
 -7 -7 2 174.88 7.2
 -7 -7 2 169.98 6.4
 -7 -7 2 161.88 6.7
 -7 -7 2 171.88 6.2
 -7 -7 2 173.18 7.8
 6 7 -2 1158.68 27.4
 -6 -7 2 1171.68 28.4
 -6 -7 2 1188.18 27.8
 -6 -7 2 1168.88 27.8
 -6 -7 2 1181.18 27.5
 5 7 -2 791.12 19.1
 -5 -7 2 805.92 19.4
 -5 -7 2 785.52 19.6
 -5 -7 2 798.92 20.2
 -5 -7 2 842.72 19.7
 4 7 -2 567.94 14.1
 -4 -7 2 586.74 14.6
 -4 -7 2 582.94 14.4
 -4 -7 2 584.54 15.1
 -4 -7 2 570.84 14.2
 3 7 -2 38.4 2.9
 -3 -7 2 36.5 2.9
 -3 -7 2 38 3.8
 -3 -7 2 34.2 3.5
 -3 -7 2 37.6 3.5
 2 7 -2 112.39 4.6
 2 7 -2 106.89 4.4
 -2 -7 2 120.79 4.8
 -2 -7 2 114.69 4.4
 -2 -7 2 103.99 3.9
 -2 -7 2 102.29 4.8
 1 7 -2 71.49 3.5
 1 7 -2 73.09 3.7
 -1 -7 2 86.79 3.6
 -1 -7 2 84.89 4.2
 -1 -7 2 84.89 3.3
 -1 -7 2 88.79 4.2
 0 7 -2 117.59 4.2
 0 7 -2 126.49 4.5
 0 -7 2 120.79 4.1
 0 -7 2 113.79 4.6
 0 -7 2 122.09 5
 0 -7 2 119.29 4.9
 0 -7 2 127.49 4.2
 -1 7 -2 967.3 22.1
 -1 7 -2 982.2 22.3
 1 -7 2 938.01 21.9
 1 -7 2 921.01 22.4
 1 -7 2 938.21 21.8
 1 -7 2 961.2 22.4
 1 -7 2 946.81 22.8
 -2 7 -2 250.47 7
 -2 7 -2 246.78 7.2
 2 -7 2 250.97 7.4
 2 -7 2 242.08 7.1
 2 -7 2 249.08 6.9
 2 -7 2 248.38 7.9
 -3 7 -2 989.3 23.2
 -3 7 -2 997.8 23.4
 3 -7 2 1000.1 23.1
 3 -7 2 985.4 23.4
 3 -7 2 981.7 24
 -4 7 -2 900.81 21.6
 -4 7 -2 906.81 21.9
 -4 7 -2 944.61 22.2
 4 -7 2 934.41 21.8
 4 -7 2 934.91 22
 4 -7 2 896.51 21.9
 4 -7 2 939.71 22.7
 -5 7 -2 377.46 10.5
 -5 7 -2 355.16 10.2
 -5 7 -2 363.46 9.7
 5 -7 2 355.16 11
 5 -7 2 368.16 10
 5 -7 2 374.86 10.2
 -6 7 -2 5.2 1.9
 -6 7 -2 -0.3 2.1
 -6 7 -2 3 2.4
 6 -7 2 1 1.9
 6 -7 2 0.3 2.1
 -7 7 -2 39.3 4
 -7 7 -2 48.3 4.9
 7 -7 2 44.5 3.9
 7 -7 2 36.3 4.6
 -8 7 -2 39.5 5.3
 -8 7 -2 23.5 3
 8 -7 2 32.4 4.9
 8 -7 2 34.5 4.1
 8 -7 2 36.1 4
 -9 7 -2 13.5 2.9
 -9 7 -2 13.8 3.3
 9 -7 2 13.1 2.6
 9 -7 2 11.5 3.2
 -10 7 -2 218.78 9.5
 -10 7 -2 208.68 8.1
 10 -7 2 221.58 7.9
 10 -7 2 213.68 9.1
 -11 7 -2 455.25 14.9
 -11 7 -2 465.65 13.5
 11 -7 2 477.95 14.6
 -12 7 -2 263.97 11.5
 -12 7 -2 259.97 10
 12 -7 2 259.77 11
 -13 7 -2 251.17 10.3
 -13 7 -2 245.28 11.9
 13 -7 2 256.87 11.5
 -14 7 -2 115.89 10.5
 -14 7 -2 126.29 8.7
 14 -7 2 129.09 10.2
 -15 7 -2 3.7 5.5
 -15 7 -2 12.9 4.8
 15 -7 2 7.6 5.2
 15 -7 2 -4 5
 -16 7 -2 7.3 6.1
 -16 7 -2 17.2 5.2
 16 -7 2 8.7 5.6
 16 -7 2 5.2 5.7
 16 6 -2 14.2 5.7
 -16 -6 2 24 5
 -16 -6 2 19.9 6.9
 15 6 -2 124.59 10.5
 -15 -6 2 147.89 11.4
 -15 -6 2 133.19 8.6
 14 6 -2 129.79 9.8
 -14 -6 2 124.19 11.1
 -14 -6 2 145.19 8.1
 13 6 -2 194.58 10.1
 -13 -6 2 220.38 8.8
 -13 -6 2 199.68 11.2
 12 6 -2 136.69 8.3
 -12 -6 2 135.09 9.4
 -12 -6 2 145.19 7.1
 -12 -6 2 143.09 8.2
 11 6 -2 230.08 9.2
 -11 -6 2 215.28 8.9
 -11 -6 2 210.88 10.2
 -11 -6 2 228.68 8.1
 10 6 -2 60.99 6
 -10 -6 2 58.79 4.8
 -10 -6 2 69.39 7.1
 -10 -6 2 61.99 5.7
 9 6 -2 50.29 5.2
 -9 -6 2 34.5 4.7
 -9 -6 2 35.1 4.2
 -9 -6 2 45.4 6.3
 8 6 -2 0.5 2.3
 -8 -6 2 3.2 2.2
 -8 -6 2 5.5 2.1
 -8 -6 2 1.6 3.1
 6 6 -2 990.8 23.8
 -6 -6 2 1008.5 24.1
 -6 -6 2 1027.5 23.8
 -6 -6 2 1006.9 24.7
 -6 -6 2 1013 23.6
 -6 -6 2 1022.9 24.2
 5 6 -2 241.88 7
 -5 -6 2 235.88 8
 -5 -6 2 244.28 7.5
 -5 -6 2 234.78 7.4
 -5 -6 2 253.37 7.1
 4 6 -2 651.53 15.8
 -4 -6 2 657.23 16.1
 -4 -6 2 655.43 16.6
 -4 -6 2 676.93 16.1
 -4 -6 2 662.63 16
 3 6 -2 1642.54 36.7
 -3 -6 2 1653.93 37.1
 -3 -6 2 1563.54 36.7
 -3 -6 2 1635.24 37.3
 -3 -6 2 1638.94 36.8
 2 6 -2 84.39 3.6
 2 6 -2 88.49 3.9
 -2 -6 2 96.09 3.9
 -2 -6 2 77.49 3.5
 -2 -6 2 77.69 4.2
 -2 -6 2 74.89 3.3
 1 6 -2 224.08 6.7
 1 6 -2 215.98 6.5
 -1 -6 2 242.98 6.4
 -1 -6 2 256.17 7
 -1 -6 2 238.98 6.3
 -1 -6 2 243.58 7.1
 0 6 -2 2.6 1.2
 0 6 -2 2 1.4
 0 -6 2 -0.4 1.5
 0 -6 2 2.5 1.4
 0 -6 2 0.7 1.6
 0 -6 2 1.6 1.1
 0 -6 2 2.7 1.6
 -1 6 -2 136.99 4.5
 -1 6 -2 131.39 4.3
 1 -6 2 128.89 4.1
 1 -6 2 127.79 4.7
 1 -6 2 132.09 4.2
 1 -6 2 133.79 4.6
 1 -6 2 132.49 5.1
 -2 6 -2 908.51 21.9
 -2 6 -2 951.8 22.1
 2 -6 2 1023.9 22.7
 2 -6 2 918.51 22.1
 2 -6 2 930.41 22
 2 -6 2 942.11 21.8
 -3 6 -2 280.17 7.8
 -3 6 -2 276.27 7.7
 3 -6 2 279.67 8.4
 3 -6 2 266.07 7.7
 3 -6 2 277.57 7.6
 -4 6 -2 2321.47 52.49
 -4 6 -2 2330.07 52.19
 -4 6 -2 2315.27 52.79
 4 -6 2 2393.76 52.39
 4 -6 2 2264.67 52.39
 4 -6 2 2324.27 53.19
 4 -6 2 2379.36 52.49
 -5 6 -2 835.22 20
 -5 6 -2 803.32 19.7
 -5 6 -2 809.92 19.3
 5 -6 2 813.12 19.4
 5 -6 2 809.72 19.6
 -6 6 -2 67.49 4.7
 -6 6 -2 79.19 4
 -6 6 -2 73.69 4.1
 -6 6 -2 75.99 4.8
 6 -6 2 83.29 3.9
 6 -6 2 67.79 4.6
 6 -6 2 74.49 3.9
 -7 6 -2 7.3 2
 -7 6 -2 7.2 2.5
 -7 6 -2 9.4 2.2
 7 -6 2 8.4 2
 7 -6 2 7 1.8
 7 -6 2 10.2 2.5
 -8 6 -2 156.28 6.2
 -8 6 -2 155.28 7
 8 -6 2 158.98 6.8
 8 -6 2 160.58 5.9
 8 -6 2 152.18 6
 -9 6 -2 3.5 2.8
 -9 6 -2 2.1 2.4
 9 -6 2 1.8 2.7
 9 -6 2 0.8 2.2
 -10 6 -2 134.79 7.9
 -10 6 -2 133.39 6.6
 10 -6 2 136.99 7.7
 10 -6 2 141.59 6.2
 -11 6 -2 316.77 11.8
 -11 6 -2 325.77 10.5
 11 -6 2 327.47 10.4
 11 -6 2 309.07 11.4
 -12 6 -2 389.56 12.2
 -12 6 -2 389.06 13.9
 12 -6 2 401.06 13.5
 -13 6 -2 315.37 11.4
 -13 6 -2 324.17 13.2
 13 -6 2 347.07 12.8
 -14 6 -2 105.49 10
 -14 6 -2 101.29 8
 14 -6 2 99.39 9.6
 -15 6 -2 166.78 9.6
 -15 6 -2 157.98 11.7
 15 -6 2 149.19 11.1
 15 -6 2 148.99 11.1
 -16 6 -2 -2.1 5.7
 -16 6 -2 2.9 4.8
 16 -6 2 -2.1 5.2
 16 -6 2 0 5.5
 16 5 -2 4.6 5.4
 -16 -5 2 1.5 4.3
 -16 -5 2 6.5 6.2
 15 5 -2 27.9 5.5
 -15 -5 2 39.9 6.7
 -15 -5 2 48.8 7.1
 14 5 -2 111.69 9.3
 -14 -5 2 119.39 7.5
 -14 -5 2 128.99 10.3
 13 5 -2 308.87 11.9
 -13 -5 2 307.87 10.3
 -13 -5 2 309.17 13.2
 -13 -5 2 307.57 11.8
 12 5 -2 95.59 7.5
 -12 -5 2 86.89 7.3
 -12 -5 2 94.59 8.3
 -12 -5 2 98.79 6.1
 11 5 -2 473.15 14.1
 -11 -5 2 474.75 12.9
 -11 -5 2 465.65 15.1
 -11 -5 2 481.05 14
 10 5 -2 200.38 8.2
 -10 -5 2 204.58 8.1
 -10 -5 2 200.98 9.2
 -10 -5 2 205.68 7.1
 9 5 -2 226.98 8.2
 -9 -5 2 220.68 7.2
 -9 -5 2 225.08 9.1
 -9 -5 2 225.58 8
 8 5 -2 170.78 6.7
 -8 -5 2 172.58 5.9
 -8 -5 2 173.08 6.5
 -8 -5 2 165.68 7.6
 7 5 -2 447.66 11.8
 -7 -5 2 438.36 11.7
 -7 -5 2 439.96 12.7
 -7 -5 2 436.86 11.2
 6 5 -2 492.85 12.5
 -6 -5 2 476.85 12
 -6 -5 2 486.15 13.3
 -6 -5 2 496.65 12.4
 5 5 -2 1536.45 34.6
 -5 -5 2 1505.95 35.3
 -5 -5 2 1538.25 34.6
 -5 -5 2 1496.25 34.7
 -5 -5 2 1532.05 34.4
 4 5 -2 420.06 10.6
 -4 -5 2 418.66 10.5
 -4 -5 2 418.16 11.3
 -4 -5 2 430.26 10.6
 -4 -5 2 426.86 10.8
 -4 -5 2 427.66 10.9
 3 5 -2 553.94 13.5
 -3 -5 2 561.74 13.7
 -3 -5 2 564.24 13.7
 -3 -5 2 572.94 14.1
 -3 -5 2 573.94 13.6
 2 5 -2 1414.06 31.6
 -2 -5 2 1348.77 31.6
 -2 -5 2 1431.86 31.9
 -2 -5 2 1399.86 31.5
 -2 -5 2 1404.56 32
 1 5 -2 171.58 5.2
 1 5 -2 174.38 5.5
 -1 -5 2 180.38 5
 -1 -5 2 175.78 5.4
 -1 -5 2 179.38 5.6
 -1 -5 2 184.58 5
 0 5 -2 62.59 2.9
 0 5 -2 67.49 3.1
 0 -5 2 64.59 2.7
 0 -5 2 64.79 3.3
 0 -5 2 64.89 3.2
 0 -5 2 67.39 3.4
 0 -5 2 70.59 2.7
 -1 5 -2 11.2 2.1
 -1 5 -2 12.3 2.1
 1 -5 2 6.8 1.6
 1 -5 2 6.9 1.2
 1 -5 2 9.9 1.7
 1 -5 2 7.4 1.5
 1 -5 2 6.3 1.5
 -2 5 -2 55.89 2.9
 -2 5 -2 50.69 2.8
 2 -5 2 50.99 2.8
 2 -5 2 57.59 3.5
 2 -5 2 52.59 2.9
 2 -5 2 53.89 3
 -3 5 -2 803.92 19.2
 -3 5 -2 796.92 19
 3 -5 2 820.82 18.9
 3 -5 2 822.52 19
 3 -5 2 802.22 18.9
 -4 5 -2 1860.21 42.3
 -4 5 -2 1844.12 42
 -4 5 -2 1880.21 42.6
 4 -5 2 1871.91 42.1
 4 -5 2 1891.81 42.2
 -5 5 -2 2485.95 55.19
 -5 5 -2 2437.86 55.79
 -5 5 -2 2415.46 55.09
 -5 5 -2 2443.56 55.59
 5 -5 2 2492.45 55.19
 5 -5 2 2485.55 55.09
 5 -5 2 2496.95 55.39
 -6 5 -2 105.79 5.3
 -6 5 -2 119.99 4.6
 -6 5 -2 115.29 5.2
 -6 5 -2 106.29 4.5
 6 -5 2 104.99 5
 6 -5 2 105.29 4.3
 6 -5 2 115.29 4.4
 -7 5 -2 431.26 12.1
 -7 5 -2 421.86 11.3
 -7 5 -2 449.95 11.6
 7 -5 2 428.76 11.2
 7 -5 2 441.36 11.4
 7 -5 2 430.16 11.9
 -8 5 -2 22 2.7
 -8 5 -2 27 3.8
 -8 5 -2 27.3 4.6
 8 -5 2 28.5 4.4
 8 -5 2 23.1 3.4
 8 -5 2 26.5 3.5
 -9 5 -2 82.99 5.2
 -9 5 -2 94.69 6.2
 9 -5 2 81.29 4.7
 9 -5 2 90.19 5.9
 -10 5 -2 54.89 6.2
 -10 5 -2 53.09 5
 10 -5 2 58.19 4.6
 10 -5 2 60.09 5.9
 -11 5 -2 520.25 14.1
 -11 5 -2 502.55 15.4
 11 -5 2 480.35 14.9
 11 -5 2 499.05 13.7
 -12 5 -2 190.68 8.1
 -12 5 -2 189.08 9.7
 12 -5 2 180.48 9.4
 -13 5 -2 501.75 15
 -13 5 -2 526.85 16.8
 13 -5 2 517.15 16.3
 -14 5 -2 298.97 13.1
 -14 5 -2 315.27 11.5
 14 -5 2 314.57 12.9
 -15 5 -2 82.89 8.1
 -15 5 -2 78.99 10.3
 15 -5 2 68.19 9.9
 15 -5 2 95.29 9.9
 -16 5 -2 36.3 5.4
 -16 5 -2 32.7 6.6
 16 -5 2 32.3 6
 16 -5 2 29.9 6.1
 16 4 -2 15.7 5.6
 -16 -4 2 21.1 6.6
 -16 -4 2 26.2 4.9
 15 4 -2 82.39 9.5
 -15 -4 2 83.49 14.2
 -15 -4 2 96.19 10.2
 -15 -4 2 67.59 7.5
 14 4 -2 171.98 10.2
 -14 -4 2 164.28 9.9
 -14 -4 2 163.58 8.3
 13 4 -2 96.39 8
 -13 -4 2 90.49 8
 -13 -4 2 98.89 6.5
 12 4 -2 173.48 8.6
 -12 -4 2 167.38 8.6
 -12 -4 2 177.28 7.4
 11 4 -2 67.09 6.3
 -11 -4 2 70.39 5
 -11 -4 2 68.49 6.3
 10 4 -2 278.87 9.6
 -10 -4 2 275.77 8.6
 -10 -4 2 285.67 9.6
 9 4 -2 318.47 10
 -9 -4 2 325.87 10
 -9 -4 2 332.07 9.2
 8 4 -2 925.11 22.4
 -8 -4 2 907.31 22.3
 -8 -4 2 941.11 21.8
 7 4 -2 34.1 3.8
 -7 -4 2 37.9 3.1
 -7 -4 2 33.6 3.6
 6 4 -2 12.9 1.9
 -6 -4 2 10.4 1.9
 -6 -4 2 15.4 1.7
 5 4 -2 996.5 23.3
 -5 -4 2 1007 23.3
 -5 -4 2 1004.4 23.9
 -5 -4 2 988.2 22.9
 -5 -4 2 1016.7 23.3
 4 4 -2 2080.59 46.9
 -4 -4 2 2099.69 46.7
 -4 -4 2 2098.99 47
 -4 -4 2 2103.39 46.9
 -4 -4 2 2109.19 47.5
 3 4 -2 781.52 18.2
 -3 -4 2 780.12 18.3
 -3 -4 2 816.82 18.9
 -3 -4 2 792.82 18.3
 -3 -4 2 779.62 18.2
 2 4 -2 1865.41 41.7
 -2 -4 2 1885.91 41.6
 -2 -4 2 1878.31 42
 -2 -4 2 1842.22 41.8
 -2 -4 2 1864.51 41.8
 1 4 -2 178.28 5.3
 1 4 -2 164.18 4.9
 -1 -4 2 164.58 4.7
 -1 -4 2 163.98 4.9
 -1 -4 2 171.48 4.6
 -1 -4 2 172.68 5.1
 0 4 -2 2118.79 47.9
 0 4 -2 2192.68 48.1
 0 -4 2 2149.88 47.7
 0 -4 2 2152.18 48.3
 0 -4 2 2193.98 47.6
 0 -4 2 2167.38 48.1
 0 -4 2 2097.09 48
 -1 4 -2 45.2 2.4
 -1 4 -2 46.3 2.5
 1 -4 2 42.7 2.8
 1 -4 2 42.5 2.3
 1 -4 2 43.1 2
 1 -4 2 37.2 2.4
 1 -4 2 46.4 2.5
 -2 4 -2 1.6 1.2
 -2 4 -2 3 1.1
 2 -4 2 -0.4 1.1
 2 -4 2 1.4 1.1
 -3 4 -2 47.5 2.8
 -3 4 -2 48.1 2.5
 -3 4 -2 46.9 2.8
 3 -4 2 51.09 2.5
 3 -4 2 44.4 2.6
 3 -4 2 48.6 2.8
 -4 4 -2 88.99 3.5
 -4 4 -2 87.69 3.9
 -4 4 -2 83.79 4
 -4 4 -2 90.59 3.4
 4 -4 2 83.69 3.8
 4 -4 2 88.69 3.3
 4 -4 2 89.49 3.4
 -5 4 -2 2120.59 48.4
 -5 4 -2 2161.18 48.6
 -5 4 -2 2095.09 47.9
 -5 4 -2 2139.59 48
 5 -4 2 2149.48 48
 5 -4 2 2140.79 47.8
 5 -4 2 2173.48 48.3
 -6 4 -2 1418.76 32.8
 -6 4 -2 1414.96 33.4
 -6 4 -2 1468.75 33.1
 6 -4 2 1460.85 33.3
 6 -4 2 1449.95 32.9
 6 -4 2 1433.86 32.7
 -7 4 -2 408.16 11.3
 -7 4 -2 408.06 10.7
 -7 4 -2 387.36 10.4
 7 -4 2 396.76 10.4
 7 -4 2 391.46 10.5
 7 -4 2 402.26 11
 -8 4 -2 574.04 14.7
 -8 4 -2 598.44 15.6
 8 -4 2 582.44 15.3
 8 -4 2 582.44 14.8
 8 -4 2 590.54 14.6
 -9 4 -2 89.79 6
 -9 4 -2 81.89 5
 9 -4 2 88.39 5.6
 9 -4 2 82.59 4.5
 -10 4 -2 31.4 5.7
 -10 4 -2 38.6 4.6
 10 -4 2 33.5 4.1
 10 -4 2 44.7 5.6
 -11 4 -2 118.29 6.3
 -11 4 -2 106.09 7.7
 11 -4 2 103.59 7.2
 11 -4 2 112.09 5.7
 -12 4 -2 512.85 15.7
 -12 4 -2 483.15 14
 12 -4 2 494.55 15.3
 12 -4 2 490.35 14.2
 -13 4 -2 371.46 13.7
 -13 4 -2 373.16 11.9
 13 -4 2 375.16 13.5
 -14 4 -2 302.77 11.1
 -14 4 -2 303.47 13
 14 -4 2 320.37 12.9
 -15 4 -2 182.38 11.7
 -15 4 -2 201.18 9.8
 15 -4 2 203.38 11.6
 15 -4 2 208.08 11.6
 -16 4 -2 64.99 8.3
 -16 4 -2 69.29 10.7
 16 -4 2 65.69 10.1
 16 -4 2 69.29 9.8
 -17 4 -2 15.8 6.2
 -17 4 -2 19.4 5.3
 17 -4 2 11.3 6
 17 3 -2 316.77 15.1
 -17 -3 2 290.67 15.5
 -17 -3 2 326.87 12.6
 16 3 -2 2.8 5.2
 -16 -3 2 4.2 4.3
 -16 -3 2 0 6.3
 15 3 -2 3.5 4.8
 -15 -3 2 12.9 4.1
 -15 -3 2 10.8 4.9
 14 3 -2 31.7 5
 -14 -3 2 31.8 5
 -14 -3 2 30.7 4.2
 13 3 -2 111.89 8.2
 -13 -3 2 110.89 8.4
 -13 -3 2 114.69 6.8
 12 3 -2 595.24 17.1
 -12 -3 2 621.94 17.3
 -12 -3 2 598.54 16
 11 3 -2 297.27 10.4
 -11 -3 2 294.97 9.3
 -11 -3 2 312.77 10.6
 10 3 -2 463.35 13.1
 -10 -3 2 460.65 13.1
 -10 -3 2 437.96 12.1
 9 3 -2 245.08 8.4
 -9 -3 2 248.08 7.6
 -9 -3 2 254.67 8.5
 8 3 -2 289.47 8.9
 -8 -3 2 285.57 8.1
 -8 -3 2 300.27 8.9
 7 3 -2 0 1.8
 -7 -3 2 3.2 1.6
 -7 -3 2 0.3 1.7
 6 3 -2 113.49 4.7
 -6 -3 2 117.39 4.1
 -6 -3 2 113.59 4.6
 5 3 -2 336.57 8.9
 -5 -3 2 342.37 8.9
 -5 -3 2 330.17 8.4
 4 3 -2 23.2 2.3
 -4 -3 2 26.2 2.3
 -4 -3 2 23.7 2.2
 -4 -3 2 25.4 2.1
 3 3 -2 268.47 6.9
 -3 -3 2 260.97 6.9
 -3 -3 2 266.17 6.7
 -3 -3 2 269.57 7.4
 -3 -3 2 267.37 6.8
 2 3 -2 3592.04 80.19
 -2 -3 2 3675.33 80.59
 -2 -3 2 3579.94 80.29
 -2 -3 2 3715.93 80.39
 1 3 -2 285.17 7.1
 1 3 -2 292.07 7.4
 -1 -3 2 289.67 6.9
 -1 -3 2 286.97 7.1
 -1 -3 2 283.47 7.3
 -1 -3 2 271.17 7.1
 0 3 -2 757.12 17.8
 0 3 -2 730.33 17.6
 0 -3 2 776.02 17.5
 0 -3 2 800.32 17.3
 0 -3 2 795.02 18
 0 -3 2 774.12 17.7
 0 -3 2 762.22 17.6
 -1 3 -2 1927.11 41.5
 -1 3 -2 1853.51 41.4
 1 -3 2 1862.51 41.5
 1 -3 2 1858.01 41.6
 1 -3 2 1800.62 41.3
 1 -3 2 1897.01 41
 1 -3 2 1824.62 41.3
 -2 3 -2 6.9 1.9
 -2 3 -2 8.3 1.8
 -2 3 -2 7.9 1.7
 2 -3 2 5.7 1.1
 2 -3 2 5.6 1.1
 -3 3 -2 69.89 3.2
 -3 3 -2 76.69 2.8
 -3 3 -2 71.79 3.1
 3 -3 2 73.69 2.6
 3 -3 2 66.99 2.7
 3 -3 2 68.69 3.1
 3 -3 2 70.69 2.7
 -4 3 -2 632.14 15.1
 -4 3 -2 604.44 14.8
 -4 3 -2 600.24 14.4
 -4 3 -2 619.44 14.6
 4 -3 2 613.44 14.8
 4 -3 2 633.84 14.6
 4 -3 2 620.84 14.3
 -5 3 -2 1264.27 29.4
 -5 3 -2 1248.88 29
 -5 3 -2 1280.07 29.7
 -5 3 -2 1290.97 29.1
 5 -3 2 1295.17 29.3
 5 -3 2 1279.97 28.8
 5 -3 2 1273.87 29.1
 -6 3 -2 1516.05 34.3
 -6 3 -2 1484.95 34.8
 -6 3 -2 1560.44 34.5
 6 -3 2 1501.95 34.4
 6 -3 2 1500.75 34.2
 6 -3 2 1507.35 34.7
 -7 3 -2 868.71 20.5
 -7 3 -2 885.91 20.8
 -7 3 -2 872.61 21.2
 7 -3 2 855.91 21
 7 -3 2 888.81 20.7
 7 -3 2 843.52 20.4
 -8 3 -2 461.45 12.6
 -8 3 -2 453.45 11.7
 8 -3 2 438.26 11.7
 8 -3 2 437.06 11.5
 8 -3 2 458.55 12.3
 -9 3 -2 120.79 6.5
 -9 3 -2 122.39 5.5
 9 -3 2 125.69 5.1
 9 -3 2 128.59 6.3
 -10 3 -2 337.07 10.1
 -10 3 -2 353.76 11.3
 10 -3 2 329.17 10.9
 10 -3 2 341.97 9.9
 -11 3 -2 2.2 2.7
 -11 3 -2 0.6 3.2
 11 -3 2 1.7 2.3
 11 -3 2 0.4 3.1
 -12 3 -2 481.95 13.4
 -12 3 -2 468.35 14.9
 12 -3 2 456.45 13.2
 12 -3 2 471.45 14.7
 -13 3 -2 645.74 18.8
 -13 3 -2 614.94 17.1
 13 -3 2 631.44 18.6
 -14 3 -2 443.36 13.7
 -14 3 -2 452.75 15.6
 14 -3 2 428.26 15.2
 -15 3 -2 258.17 10.6
 -15 3 -2 239.78 12.6
 15 -3 2 262.17 12.4
 15 -3 2 266.77 12.6
 -16 3 -2 100.39 10.9
 -16 3 -2 105.99 8.8
 16 -3 2 99.99 10.2
 16 -3 2 113.39 10.6
 -17 3 -2 38.6 6.9
 -17 3 -2 33.8 5.6
 17 -3 2 35 6.5
 17 2 -2 92.59 11.4
 -17 -2 2 72.69 12.8
 -17 -2 2 88.09 9
 16 2 -2 172.08 11.6
 -16 -2 2 170.58 9.5
 -16 -2 2 177.58 11.4
 15 2 -2 19.4 5.1
 -15 -2 2 19.7 5.1
 -15 -2 2 16.6 4.3
 14 2 -2 7.1 4.4
 -14 -2 2 1.6 3.7
 -14 -2 2 11.8 4.5
 13 2 -2 73.99 7.8
 -13 -2 2 76.69 6.3
 -13 -2 2 70.09 7.9
 12 2 -2 303.17 11.1
 -12 -2 2 313.97 11.4
 -12 -2 2 308.77 9.9
 11 2 -2 295.27 10.5
 -11 -2 2 302.77 9.4
 -11 -2 2 319.67 10.8
 10 2 -2 213.88 8.2
 -10 -2 2 224.88 8.5
 -10 -2 2 226.98 7.4
 9 2 -2 598.54 15.7
 -9 -2 2 601.24 15
 -9 -2 2 605.84 15.9
 8 2 -2 1105.99 26.5
 -8 -2 2 1127.59 26.6
 -8 -2 2 1111.99 25.9
 7 2 -2 406.06 11
 -7 -2 2 416.26 10.5
 -7 -2 2 417.36 11.1
 6 2 -2 -0.9 1.6
 -6 -2 2 2.1 1.4
 -6 -2 2 -0.5 1.6
 5 2 -2 78.99 3.6
 -5 -2 2 80.99 3.6
 -5 -2 2 78.29 3.2
 4 2 -2 756.12 17.6
 -4 -2 2 743.03 17.3
 -4 -2 2 763.32 17.6
 3 2 -2 630.04 14.8
 -3 -2 2 632.74 14.8
 -3 -2 2 642.84 14.6
 -3 -2 2 634.74 14.5
 2 2 -2 3517.75 79.29
 -2 -2 2 3614.94 79.29
 -2 -2 2 3623.74 79.19
 -2 -2 2 3640.04 79.19
 1 2 -2 23.8 1.7
 -1 -2 2 25.5 1.6
 -1 -2 2 22.1 2
 -1 -2 2 25.1 2.2
 0 2 -2 3248.48 75.09
 0 2 -2 3211.28 74.99
 0 -2 2 3452.85 74.89
 0 -2 2 3396.96 75.29
 0 -2 2 3496.55 75.29
 0 -2 2 3485.05 74.89
 0 -2 2 3543.95 74.59
 -1 2 -2 11.3 1.6
 -1 2 -2 10.4 0.9
 -1 2 -2 12.1 1.7
 1 -2 2 13 1.5
 1 -2 2 16.1 1.7
 1 -2 2 15 1.6
 -2 2 -2 2563.84 56.69
 -2 2 -2 2552.84 56.39
 -2 2 -2 2504.75 56.49
 2 -2 2 2583.34 56.19
 2 -2 2 2542.65 56.29
 2 -2 2 2577.44 56.49
 -3 2 -2 37.1 2.1
 -3 2 -2 37.4 2.4
 -3 2 -2 37.1 2.5
 -3 2 -2 37.1 2
 3 -2 2 36.4 1.7
 3 -2 2 31.5 2.3
 3 -2 2 38.1 2.1
 -4 2 -2 8.9 1.5
 -4 2 -2 11 2.4
 -4 2 -2 9.6 1.2
 -4 2 -2 12.5 1.9
 4 -2 2 10.7 1.5
 4 -2 2 6.1 1.4
 4 -2 2 7.5 1.1
 -5 2 -2 1348.77 30.2
 -5 2 -2 1318.77 30.5
 -5 2 -2 1326.37 30
 5 -2 2 1333.67 30.4
 5 -2 2 1299.67 29.9
 5 -2 2 1345.57 30.2
 -6 2 -2 565.04 14.2
 -6 2 -2 574.54 13.8
 -6 2 -2 568.54 13.6
 6 -2 2 569.64 13.8
 6 -2 2 555.14 13.5
 6 -2 2 555.14 14
 -7 2 -2 1840.72 41.3
 -7 2 -2 1846.72 42
 7 -2 2 1803.62 41.3
 7 -2 2 1824.12 41.8
 -8 2 -2 322.27 9.7
 -8 2 -2 319.27 8.8
 8 -2 2 320.87 9.5
 8 -2 2 317.57 8.8
 -9 2 -2 494.55 12.7
 -9 2 -2 483.85 13.6
 9 -2 2 472.35 12.7
 9 -2 2 491.95 13.4
 -10 2 -2 32.1 4.3
 -10 2 -2 33 5.4
 10 -2 2 36.2 4
 10 -2 2 33.6 5.3
 -11 2 -2 224.38 9.2
 -11 2 -2 221.18 7.9
 11 -2 2 212.18 7.8
 11 -2 2 209.48 8.8
 -12 2 -2 106.99 7.8
 -12 2 -2 111.99 6.3
 12 -2 2 95.99 6
 12 -2 2 79.79 7.5
 -13 2 -2 351.06 11.2
 -13 2 -2 364.26 12.9
 13 -2 2 326.67 12.5
 13 -2 2 323.27 11.3
 -14 2 -2 221.68 11.2
 -14 2 -2 201.68 9.1
 14 -2 2 209.88 10.9
 14 -2 2 226.28 10.9
 -15 2 -2 213.98 9.9
 -15 2 -2 225.58 11.8
 15 -2 2 218.98 11.7
 15 -2 2 211.98 11.5
 -16 2 -2 39.4 6.3
 -16 2 -2 34.9 5.1
 16 -2 2 27.8 5.8
 16 -2 2 41 5.9
 -17 2 -2 187.38 13.1
 -17 2 -2 195.18 10.5
 17 -2 2 201.98 12.8
 17 1 -2 255.87 14
 -17 -1 2 242.58 11.7
 -17 -1 2 267.27 14
 16 1 -2 134.69 11
 -16 -1 2 145.29 9.3
 -16 -1 2 159.58 11.4
 15 1 -2 24.3 5.3
 -15 -1 2 24.9 5.4
 -15 -1 2 26.3 4.5
 14 1 -2 14.9 4.5
 -14 -1 2 9.6 3.8
 -14 -1 2 15.5 4.5
 13 1 -2 17.3 4.2
 -13 -1 2 17.9 4.3
 -13 -1 2 21 3.7
 12 1 -2 24.1 4
 -12 -1 2 26.5 4.1
 -12 -1 2 24.4 3.5
 11 1 -2 120.19 7.1
 -11 -1 2 127.49 7.2
 -11 -1 2 121.79 6
 10 1 -2 217.68 8.2
 -10 -1 2 218.78 8.3
 -10 -1 2 213.98 7.3
 9 1 -2 366.96 10.8
 -9 -1 2 373.16 10
 -9 -1 2 363.76 10.9
 8 1 -2 605.54 15.6
 -8 -1 2 615.74 15.7
 -8 -1 2 613.44 15
 7 1 -2 308.97 8.8
 -7 -1 2 304.37 8.9
 -7 -1 2 316.17 8.3
 6 1 -2 31 3.1
 -6 -1 2 35.2 3.2
 -6 -1 2 40.7 2.7
 5 1 -2 82.89 3.6
 -5 -1 2 82.99 3.7
 -5 -1 2 83.19 3.2
 4 1 -2 12.3 2.1
 -4 -1 2 11.4 1.8
 -4 -1 2 11.1 2.1
 3 1 -2 21.9 1.9
 -3 -1 2 22.8 1.7
 -3 -1 2 24.1 2
 2 1 -2 50.49 1.8
 2 1 -2 50.89 2.2
 -2 -1 2 50.19 2
 -2 -1 2 52.19 2.2
 -2 -1 2 51.09 1.8
 1 1 -2 2283.37 50.09
 1 1 -2 2180.48 49.9
 -1 -1 2 2332.17 50.09
 -1 -1 2 2278.87 49.9
 -1 -1 2 2278.97 49.99
 0 1 -2 4513.95 104.29
 0 1 -2 4502.85 104.09
 0 -1 2 4984.1 104.29
 0 -1 2 4799.62 104.49
 0 -1 2 4775.02 104.49
 -1 1 -2 9999 216.98
 -1 1 -2 9870.61 217.28
 1 -1 2 9759.22 217.48
 1 -1 2 9830.92 215.88
 1 -1 2 9656.33 216.68
 -2 1 -2 91.39 3
 -2 1 -2 97.59 3.2
 -2 1 -2 94.39 2.9
 2 -1 2 99.99 3
 -3 1 -2 64.49 3
 -3 1 -2 65.59 2.6
 -3 1 -2 64.19 2.9
 -3 1 -2 65.49 2.4
 3 -1 2 65.69 2.1
 3 -1 2 66.59 2.6
 3 -1 2 66.59 2.8
 -4 1 -2 1015.7 23.2
 -4 1 -2 1052.49 23.4
 -4 1 -2 1024.3 23.6
 -4 1 -2 1015.3 23.7
 4 -1 2 1013.9 23.5
 4 -1 2 1042.1 23.4
 -5 1 -2 297.67 7.6
 -5 1 -2 283.87 7.9
 -5 1 -2 288.77 7.4
 5 -1 2 281.77 7.8
 -6 1 -2 2666.53 59.69
 -6 1 -2 2668.63 59.09
 6 -1 2 2635.24 59.49
 -7 1 -2 278.87 8.4
 -7 1 -2 278.07 7.6
 7 -1 2 288.27 8.3
 -8 1 -2 1046.9 25
 -8 1 -2 1038.5 24.2
 8 -1 2 1028.4 24.8
 -9 1 -2 376.66 10.2
 -9 1 -2 391.06 11.3
 9 -1 2 364.26 10.9
 -10 1 -2 247.68 8.9
 -10 1 -2 229.28 7.6
 10 -1 2 225.88 8.5
 -11 1 -2 215.18 9
 -11 1 -2 201.38 7.6
 11 -1 2 213.68 8.6
 -12 1 -2 143.19 6.9
 -12 1 -2 152.28 8.5
 12 -1 2 151.98 8.2
 -13 1 -2 74.29 8
 -13 1 -2 72.69 6.2
 13 -1 2 67.19 7.6
 -14 1 -2 585.24 16.6
 -14 1 -2 618.44 18.4
 14 -1 2 579.54 18.1
 14 -1 2 607.34 18.3
 -15 1 -2 84.89 7.7
 -15 1 -2 100.09 9.6
 15 -1 2 104.59 9.6
 15 -1 2 108.09 9.7
 -16 1 -2 106.19 10.4
 -16 1 -2 106.29 8.5
 16 -1 2 104.69 10
 16 -1 2 109.29 10.3
 -17 1 -2 105.49 11.6
 -17 1 -2 97.79 8.9
 17 -1 2 87.29 11.1
 17 0 -2 94.29 11.5
 -17 0 2 104.19 11.6
 -17 0 2 111.19 9.5
 16 0 -2 188.58 12.1
 -16 0 2 185.88 10
 -16 0 2 195.18 12.2
 15 0 -2 204.88 11.5
 -15 0 2 203.98 9.5
 -15 0 2 202.48 11.5
 14 0 -2 1.6 4.2
 -14 0 2 -0.4 3.6
 -14 0 2 6.9 4.4
 13 0 -2 -5.3 3.7
 -13 0 2 -2 3.3
 -13 0 2 2.5 3.8
 12 0 -2 1.5 3.4
 -12 0 2 6.4 3.7
 -12 0 2 6.9 3.2
 11 0 -2 225.68 9.1
 -11 0 2 228.98 8
 -11 0 2 239.58 9.4
 10 0 -2 251.77 9.1
 -10 0 2 277.27 9.3
 -10 0 2 262.37 8.3
 9 0 -2 623.24 16
 -9 0 2 599.54 16.1
 -9 0 2 618.54 15.3
 8 0 -2 1707.23 39.4
 -8 0 2 1725.53 39.5
 -8 0 2 1692.03 38.8
 7 0 -2 225.68 7.1
 -7 0 2 221.28 7.2
 -7 0 2 232.28 6.6
 6 0 -2 442.86 11.4
 -6 0 2 439.16 11.4
 -6 0 2 450.35 10.9
 5 0 -2 53.29 3.1
 -5 0 2 53.39 2.7
 -5 0 2 55.59 3.2
 4 0 -2 182.88 5.3
 -4 0 2 181.68 5.4
 -4 0 2 187.58 5
 3 0 -2 14.5 1.8
 -3 0 2 12.1 1.9
 -3 0 2 12.1 1.6
 2 0 -2 98.99 3
 -2 0 2 98.79 3.1
 -2 0 2 98.99 2.8
 1 0 -2 1945.41 43
 -1 0 2 1982.2 42.9
 -1 0 2 1923.21 43
 0 0 -2 1784.82 39.4
 0 0 -2 1783.82 39.3
 0 0 2 1765.02 39.4
 0 0 2 1762.42 39.2
 -1 0 -2 4516.65 102.29
 -1 0 -2 4711.13 102.99
 -1 0 -2 4628.44 102.69
 -1 0 -2 4724.03 101.79
 1 0 2 4610.44 102.89
 -2 0 -2 525.85 12.4
 -2 0 -2 534.85 12
 -2 0 -2 536.95 12.3
 -2 0 -2 552.94 12.2
 2 0 2 537.45 12.3
 2 0 2 537.65 12.2
 2 0 2 540.45 12
 -3 0 -2 798.02 18
 -3 0 -2 785.42 17.6
 -3 0 -2 792.52 17.8
 -3 0 -2 764.62 18
 3 0 2 779.72 17.9
 -4 0 -2 189.48 5.4
 -4 0 -2 188.38 5.1
 -4 0 -2 188.78 4.9
 4 0 2 180.18 5.3
 -5 0 -2 56.89 2.6
 -5 0 -2 56.59 3.2
 -6 0 -2 463.35 11.8
 -6 0 -2 462.45 11.2
 6 0 2 459.15 11.6
 -7 0 -2 45.6 3.8
 -7 0 -2 45.4 2.9
 -8 0 -2 1247.88 29
 -8 0 -2 1290.27 29.8
 8 0 2 1252.37 29.6
 -9 0 -2 144.29 6.4
 -9 0 -2 135.49 5.3
 9 0 2 143.09 6.2
 -10 0 -2 929.21 22.3
 -10 0 -2 933.61 23.4
 10 0 2 937.21 23.2
 -11 0 -2 112.69 7
 -12 0 -2 41.9 5.2
 -12 0 -2 53.59 6.8
 12 0 2 48.8 6.5
 -13 0 -2 48.5 5.9
 -13 0 -2 48 7.2
 13 0 2 44.6 7.3
 13 0 2 42.7 7.4
 -14 0 -2 50.99 6.3
 -14 0 -2 56.29 8.2
 14 0 2 43.9 7.9
 14 0 2 49 7.9
 -15 0 -2 31.3 4.5
 -15 0 -2 26.8 5.2
 15 0 2 37.5 5.4
 15 0 2 29.1 5.2
 -16 0 -2 130.29 8.4
 -16 0 -2 125.79 10.6
 16 0 2 117.89 10.5
 -17 0 -2 146.29 11.9
 -17 0 -2 152.38 9.4
 17 0 2 141.89 11.9
 17 -1 -2 101.49 11.7
 -17 1 2 137.29 10
 -17 1 2 104.19 11.8
 16 -1 -2 300.27 13.7
 -16 1 2 288.77 11.8
 -16 1 2 267.07 13.8
 15 -1 -2 51.39 8.9
 -15 1 2 55.59 9.3
 -15 1 2 52.79 7.3
 14 -1 -2 2.6 4.3
 -14 1 2 2.5 3.8
 -14 1 2 6.2 4.4
 13 -1 -2 6.2 4
 -13 1 2 7.2 3.4
 -13 1 2 10.9 4.2
 12 -1 -2 126.89 7.8
 -12 1 2 100.89 7.8
 -12 1 2 102.29 6.5
 11 -1 -2 54.09 6
 -11 1 2 38.6 6.1
 10 -1 -2 14.2 3
 -10 1 2 13.1 3
 -10 1 2 11.1 2.6
 9 -1 -2 657.13 17.3
 -9 1 2 677.03 16.6
 -9 1 2 684.33 17.5
 8 -1 -2 407.36 11
 8 -1 -2 414.26 11
 -8 1 2 375.26 11
 -8 1 2 371.86 10.3
 7 -1 -2 1158.88 26.9
 7 -1 -2 1136.79 26.8
 -7 1 2 1132.89 27
 -7 1 2 1160.48 26.5
 6 -1 -2 1305.27 30.4
 6 -1 -2 1316.57 30.4
 -6 1 2 1331.17 30.6
 -6 1 2 1340.67 30.1
 5 -1 -2 209.38 6.1
 5 -1 -2 208.18 6.1
 -5 1 2 208.18 6.2
 -5 1 2 203.18 5.7
 4 -1 -2 3.3 1.3
 4 -1 -2 3.2 1.3
 -4 1 2 4.4 1.3
 -4 1 2 5.4 1.2
 3 -1 -2 118.29 3.7
 -3 1 2 119.79 3.5
 -3 1 2 115.39 3.7
 2 -1 -2 4.5 0.9
 -2 1 2 4.7 1
 -2 1 2 4.7 0.8
 1 -1 -2 1900.51 43.9
 1 -1 -2 1980.2 44
 -1 1 2 1996.6 44
 -1 1 2 2103.19 44
 -1 1 2 1991.8 43.9
 0 -1 -2 1266.87 28.1
 0 -1 -2 1317.27 28.3
 0 -1 -2 1260.17 28.1
 0 -1 -2 1260.67 28.3
 0 -1 -2 1288.67 28.2
 0 1 2 1275.97 28.2
 0 1 2 1267.27 28.1
 0 1 2 1278.17 28.2
 0 1 2 1279.97 28.1
 -1 -1 -2 3694.23 81.49
 -1 -1 -2 3731.93 81.89
 -1 -1 -2 3632.44 81.89
 -1 -1 -2 3758.32 81.69
 -1 -1 -2 3710.43 81.49
 -1 -1 -2 3632.04 81.29
 1 1 2 3751.62 81.59
 1 1 2 3697.73 81.39
 1 1 2 3673.63 81.99
 1 1 2 3654.13 81.69
 -2 -1 -2 378.26 8.7
 -2 -1 -2 368.16 8.5
 -2 -1 -2 380.86 8.7
 -2 -1 -2 383.26 8.4
 -2 -1 -2 356.56 8.5
 2 1 2 364.76 8.6
 -3 -1 -2 45 1.9
 -3 -1 -2 41.9 1.7
 -3 -1 -2 43.9 2.2
 3 1 2 46.4 2.2
 -4 -1 -2 696.03 16.3
 -4 -1 -2 704.33 15.9
 4 1 2 709.43 16.3
 -5 -1 -2 301.47 8
 -5 -1 -2 306.37 7.4
 5 1 2 294.07 7.9
 -6 -1 -2 14.2 1.9
 -6 -1 -2 19.2 2.2
 6 1 2 15.3 2.8
 -7 -1 -2 1293.77 28.8
 -7 -1 -2 1252.47 29.4
 7 1 2 1257.37 29.3
 -8 -1 -2 252.47 7.9
 -8 -1 -2 247.28 7
 8 1 2 237.68 7.7
 -9 -1 -2 910.71 21.4
 -9 -1 -2 888.51 22.2
 9 1 2 917.51 22.2
 -10 -1 -2 521.85 14.4
 -10 -1 -2 517.55 13.3
 10 1 2 519.95 14.3
 -11 -1 -2 515.65 13.7
 -11 -1 -2 531.15 15
 11 1 2 523.85 14.8
 -12 -1 -2 12.7 2.9
 -12 -1 -2 6.8 3.5
 12 1 2 10.5 3.5
 -13 -1 -2 121.59 8.4
 -13 -1 -2 119.19 6.7
 13 1 2 120.49 8.3
 13 1 2 118.59 8.3
 -14 -1 -2 68.29 6.3
 -14 -1 -2 72.69 8.3
 14 1 2 40.9 7.7
 14 1 2 62.69 8.1
 -15 -1 -2 74.89 9
 -15 -1 -2 76.09 7.1
 15 1 2 73.79 8.9
 -16 -1 -2 81.49 10
 -16 -1 -2 79.69 7.6
 16 1 2 78.79 9.9
 -17 -1 -2 163.98 11.9
 -17 -1 -2 155.08 9.5
 17 1 2 169.48 12.2
 17 -2 -2 100.89 11.6
 -17 2 2 114.39 9.5
 -17 2 2 101.79 12.1
 16 -2 -2 117.39 11
 -16 2 2 124.99 9.1
 -16 2 2 123.39 11.4
 15 -2 -2 210.98 11.2
 15 -2 -2 245.68 12
 -15 2 2 231.08 12.2
 -15 2 2 230.98 10.4
 14 -2 -2 71.59 8
 14 -2 -2 61.49 8.5
 -14 2 2 71.19 8.7
 -14 2 2 70.69 6.9
 13 -2 -2 115.49 8.4
 -13 2 2 99.59 7
 -13 2 2 104.39 8.5
 12 -2 -2 15.1 3.8
 -12 2 2 20.5 4
 -12 2 2 15.9 3.5
 11 -2 -2 22.1 3.6
 -11 2 2 32 4.9
 -11 2 2 22.7 3.8
 10 -2 -2 12.5 3
 -10 2 2 11.1 2.8
 -10 2 2 10.5 3
 9 -2 -2 508.05 13.9
 9 -2 -2 506.85 13.8
 -9 2 2 514.15 13.2
 -9 2 2 510.55 14.1
 8 -2 -2 747.03 21
 8 -2 -2 771.12 19.2
 8 -2 -2 785.02 19.2
 -8 2 2 798.42 18.7
 -8 2 2 769.92 19.4
 7 -2 -2 1942.41 45.3
 7 -2 -2 2007.9 45.1
 7 -2 -2 1973.1 45.3
 -7 2 2 2040.1 44.9
 -7 2 2 1991 45.5
 6 -2 -2 35.6 3.3
 6 -2 -2 36 3.3
 6 -2 -2 33.6 2.8
 -6 2 2 42.8 2.9
 -6 2 2 48.2 3.5
 5 -2 -2 367.36 9.4
 5 -2 -2 348.17 9.3
 -5 2 2 374.06 9.1
 -5 2 2 356.66 9.5
 4 -2 -2 12.8 2.3
 4 -2 -2 11.7 2.2
 -4 2 2 11.8 1.4
 -4 2 2 14.1 2.3
 3 -2 -2 114.49 3.6
 3 -2 -2 119.39 3.7
 -3 2 2 110.19 3.7
 -3 2 2 113.99 3.4
 2 -2 -2 8.6 2
 2 -2 -2 7.4 1.6
 -2 2 2 8.3 1.5
 -2 2 2 7.7 1.7
 1 -2 -2 458.05 10.7
 1 -2 -2 482.95 10.7
 1 -2 -2 464.05 11
 -1 2 2 457.05 10.6
 -1 2 2 471.55 10.7
 -1 2 2 487.05 10.9
 0 -2 -2 920.41 21.3
 0 -2 -2 991.4 21.2
 0 -2 -2 920.81 21.3
 0 -2 -2 1024.8 21.4
 0 -2 -2 965.4 21.6
 0 -2 -2 945.61 21.1
 0 2 2 971.1 21.1
 0 2 2 941.31 21.1
 0 2 2 945.81 21.1
 -1 -2 -2 1320.27 29.5
 -1 -2 -2 1354.26 29.4
 -1 -2 -2 1296.27 29.7
 -1 -2 -2 1311.47 29.6
 -1 -2 -2 1379.36 29.5
 -2 -2 -2 640.84 15.2
 -2 -2 -2 674.73 15.1
 -2 -2 -2 671.93 15.2
 -2 -2 -2 673.63 15.1
 -2 -2 -2 684.63 14.9
 2 2 2 676.23 15.1
 2 2 2 687.63 15.1
 2 2 2 668.63 14.8
 -3 -2 -2 601.64 13.7
 -3 -2 -2 608.14 13.7
 -3 -2 -2 609.94 13.4
 -3 -2 -2 574.34 13.7
 3 2 2 590.94 13.7
 -4 -2 -2 25.9 1.6
 -4 -2 -2 28.1 2.1
 4 2 2 27.1 2.1
 -5 -2 -2 218.08 5.4
 -5 -2 -2 208.18 5.9
 5 2 2 199.78 5.8
 -6 -2 -2 96.49 3.4
 -6 -2 -2 95.89 4
 6 2 2 97.19 4
 -7 -2 -2 -0.9 1.6
 -7 -2 -2 0.8 1.4
 7 2 2 2.2 1.7
 -8 -2 -2 517.45 13.3
 -8 -2 -2 509.15 12.4
 8 2 2 494.95 13.1
 -9 -2 -2 360.46 9.6
 -9 -2 -2 362.46 10.6
 9 2 2 369.06 10.5
 -10 -2 -2 348.17 9.7
 -10 -2 -2 350.66 10.8
 10 2 2 348.77 10.6
 -11 -2 -2 812.02 19.7
 -11 -2 -2 812.92 20.9
 11 2 2 803.12 20.8
 -12 -2 -2 95.49 5.5
 -12 -2 -2 89.29 7
 12 2 2 85.19 7
 12 2 2 95.19 7.1
 -13 -2 -2 19.6 3.3
 -13 -2 -2 23.9 4.2
 13 2 2 15.5 4
 13 2 2 12.2 3.9
 -14 -2 -2 -1 3.9
 -14 -2 -2 -1.1 3.2
 14 2 2 -1.2 3.9
 14 2 2 -1 3.8
 -15 -2 -2 10.7 3.7
 -15 -2 -2 13.2 4.7
 15 2 2 15.6 5
 -16 -2 -2 58.79 7.2
 -16 -2 -2 60.29 9.4
 16 2 2 72.39 9.8
 -17 -2 -2 102.89 8.6
 -17 -2 -2 124.29 14.6
 17 2 2 115.69 11.4
 16 -3 -2 146.19 11.4
 -16 3 2 142.99 11.7
 -16 3 2 141.29 9.6
 15 -3 -2 65.19 9.3
 15 -3 -2 64.69 8
 -15 3 2 63.09 9.6
 -15 3 2 62.89 7.8
 14 -3 -2 156.38 10.2
 14 -3 -2 169.18 9.4
 -14 3 2 162.78 10.3
 -14 3 2 147.59 8.5
 13 -3 -2 115.29 8.1
 13 -3 -2 111.79 8.4
 -13 3 2 98.39 7.3
 -13 3 2 116.99 8.8
 12 -3 -2 360.86 12.3
 12 -3 -2 348.37 12.3
 -12 3 2 363.96 12.8
 -12 3 2 352.46 11.3
 11 -3 -2 149.09 7.9
 11 -3 -2 140.29 7.7
 -11 3 2 162.48 7
 -11 3 2 155.18 8.2
 10 -3 -2 -3.8 2.7
 10 -3 -2 1.1 2.8
 10 -3 -2 0.3 2.7
 -10 3 2 -0.7 2.5
 -10 3 2 3.7 2.9
 9 -3 -2 26.6 4.7
 9 -3 -2 33 4.7
 9 -3 -2 24.7 4.6
 -9 3 2 27.7 3.9
 -9 3 2 30.9 4.9
 8 -3 -2 527.75 13.9
 8 -3 -2 527.25 13.5
 8 -3 -2 512.15 14.2
 8 -3 -2 532.95 13.9
 -8 3 2 517.15 14.1
 -8 3 2 532.55 13.3
 7 -3 -2 32.8 3.8
 7 -3 -2 32.6 3.1
 7 -3 -2 34.2 3.7
 7 -3 -2 29.1 3.7
 -7 3 2 31.8 3.8
 -7 3 2 36.1 3.2
 6 -3 -2 458.55 11.5
 6 -3 -2 440.06 11.8
 6 -3 -2 438.46 11.4
 6 -3 -2 447.36 11.2
 -6 3 2 437.36 11.1
 -6 3 2 430.86 11.6
 5 -3 -2 1799.32 40.5
 5 -3 -2 1810.72 40.1
 5 -3 -2 1795.72 39.9
 -5 3 2 1721.63 40.2
 -5 3 2 1735.33 39.8
 4 -3 -2 346.77 8.7
 4 -3 -2 342.07 9.1
 4 -3 -2 338.27 8.5
 -4 3 2 342.97 8.8
 -4 3 2 337.77 8.5
 3 -3 -2 149.09 4.4
 3 -3 -2 155.18 4.2
 3 -3 -2 151.38 4.7
 3 -3 -2 153.58 4.4
 -3 3 2 144.09 4.5
 -3 3 2 145.79 4.2
 2 -3 -2 3.5 1
 2 -3 -2 4.3 1
 2 -3 -2 3.2 0.8
 2 -3 -2 4.5 1.2
 2 -3 -2 4.2 1
 -2 3 2 3.8 0.9
 -2 3 2 3.2 1
 1 -3 -2 269.27 6.2
 1 -3 -2 258.47 6.8
 1 -3 -2 269.77 6.1
 1 -3 -2 255.77 6.5
 -1 3 2 258.27 6.2
 -1 3 2 260.27 6.3
 0 -3 -2 161.18 4.5
 0 -3 -2 152.68 4.2
 0 -3 -2 166.38 4.3
 0 -3 -2 158.48 4.3
 0 -3 -2 168.58 3.9
 0 3 2 159.58 3.8
 -1 -3 -2 2074.99 44.9
 -1 -3 -2 2054.29 44.9
 -1 -3 -2 1983.1 45.2
 -1 -3 -2 1970.8 45
 -1 -3 -2 2076.39 44.9
 -2 -3 -2 1411.96 32.4
 -2 -3 -2 1396.36 32.2
 -2 -3 -2 1500.05 32.2
 -2 -3 -2 1421.86 32.2
 2 3 2 1474.45 31.9
 2 3 2 1465.65 31.9
 -3 -3 -2 2723.33 58.89
 -3 -3 -2 2698.83 59.39
 -3 -3 -2 2749.52 59.39
 -3 -3 -2 2684.73 59.39
 -3 -3 -2 2660.93 59.09
 3 3 2 2577.84 59.09
 -4 -3 -2 225.18 6
 -4 -3 -2 225.58 5.4
 -4 -3 -2 228.58 5.9
 4 3 2 215.98 5.8
 -5 -3 -2 211.28 5.9
 -5 -3 -2 197.88 5.7
 -5 -3 -2 202.38 5.2
 5 3 2 200.28 5.7
 -6 -3 -2 203.28 5.5
 -6 -3 -2 205.88 6.1
 6 3 2 212.28 6.1
 -7 -3 -2 7 1.4
 -7 -3 -2 2.2 1.7
 7 3 2 4.3 1.8
 -8 -3 -2 105.79 4.9
 -8 -3 -2 101.39 4
 8 3 2 93.19 4.8
 -9 -3 -2 296.87 9
 -9 -3 -2 290.57 8
 9 3 2 288.77 9
 -10 -3 -2 568.14 14.4
 -10 -3 -2 585.54 15.5
 10 3 2 581.34 15.4
 -11 -3 -2 332.57 10.9
 -11 -3 -2 321.97 9.6
 11 3 2 337.57 10.9
 11 3 2 345.37 10.8
 -12 -3 -2 224.28 9.3
 -12 -3 -2 222.18 7.8
 12 3 2 230.28 9.3
 12 3 2 221.68 9.2
 -13 -3 -2 1.9 2.9
 -13 -3 -2 4.5 3.6
 13 3 2 1 3.6
 13 3 2 -4.5 3.4
 -14 -3 -2 3.1 3.9
 -14 -3 -2 0.9 3.1
 14 3 2 1.9 4
 -15 -3 -2 -3 3.4
 -15 -3 -2 3.5 4.3
 15 3 2 1 4.4
 -16 -3 -2 5 6.2
 -16 -3 -2 14.6 5.3
 -16 -3 -2 9 4.1
 16 3 2 1.1 5
 -17 -3 -2 34.7 5
 17 3 2 33.3 6.3
 16 -4 -2 76.29 10.4
 -16 4 2 67.29 8.8
 -16 4 2 71.59 10.9
 15 -4 -2 200.18 11.7
 -15 4 2 208.48 9.9
 -15 4 2 194.08 12.1
 14 -4 -2 42.4 7.3
 14 -4 -2 32.9 5.4
 -14 4 2 35.6 4.8
 -14 4 2 27.5 5.3
 13 -4 -2 63.09 7.2
 13 -4 -2 58.39 8
 -13 4 2 62.29 6.7
 -13 4 2 59.39 8.3
 12 -4 -2 295.07 11.2
 12 -4 -2 303.27 11.3
 -12 4 2 305.47 11.8
 -12 4 2 303.77 10.4
 11 -4 -2 34.6 5.8
 11 -4 -2 34.7 5.9
 11 -4 -2 31.8 5.6
 -11 4 2 34.4 6.5
 -11 4 2 29.6 3.6
 10 -4 -2 176.48 7.5
 10 -4 -2 163.68 7.6
 10 -4 -2 166.88 7.5
 -10 4 2 164.88 8.1
 -10 4 2 171.88 6.9
 9 -4 -2 -0.5 2.4
 9 -4 -2 -0.3 2.5
 9 -4 -2 0.6 2.4
 -9 4 2 -1.4 2.5
 -9 4 2 0 2.2
 8 -4 -2 71.09 4.8
 8 -4 -2 72.79 4.9
 8 -4 -2 71.39 4.9
 8 -4 -2 73.29 4.1
 -8 4 2 79.09 4.4
 -8 4 2 70.19 5.1
 7 -4 -2 425.76 11.9
 7 -4 -2 433.46 11.6
 7 -4 -2 438.16 11.2
 -7 4 2 427.46 11.2
 -7 4 2 442.66 11.9
 6 -4 -2 647.84 15.8
 6 -4 -2 642.04 15.5
 6 -4 -2 639.74 16.1
 -6 4 2 639.34 15.9
 -6 4 2 630.64 15.4
 5 -4 -2 628.74 14.8
 5 -4 -2 619.84 15.4
 5 -4 -2 630.04 15.1
 -5 4 2 620.54 14.8
 -5 4 2 605.54 15.2
 4 -4 -2 267.57 7.1
 4 -4 -2 266.37 6.9
 4 -4 -2 262.17 7.4
 -4 4 2 260.27 6.9
 -4 4 2 253.87 7.2
 3 -4 -2 639.54 14.6
 3 -4 -2 629.14 15.2
 3 -4 -2 644.04 14.8
 3 -4 -2 639.64 15
 -3 4 2 621.94 14.9
 -3 4 2 625.34 14.7
 2 -4 -2 376.76 8.8
 2 -4 -2 390.86 9
 2 -4 -2 364.16 9.2
 2 -4 -2 380.66 9.1
 2 -4 -2 373.86 9.5
 -2 4 2 371.46 9.1
 -2 4 2 376.66 8.9
 1 -4 -2 176.58 4.5
 1 -4 -2 179.88 4.4
 1 -4 -2 165.88 4.8
 1 -4 -2 168.58 4.8
 1 -4 -2 168.48 4.1
 1 -4 -2 172.78 4.3
 1 -4 -2 171.48 5.1
 -1 4 2 172.58 4.4
 -1 4 2 168.48 4.4
 -1 4 2 169.28 4.4
 0 -4 -2 3626.74 81.39
 0 -4 -2 3652.33 81.29
 0 -4 -2 3540.55 81.39
 0 -4 -2 3857.21 81.69
 0 -4 -2 3674.33 81.69
 0 4 2 3809.12 80.99
 -1 -4 -2 196.78 5.2
 -1 -4 -2 198.38 5.2
 -1 -4 -2 194.48 5.3
 -1 -4 -2 197.48 5.2
 -1 -4 -2 192.68 5.6
 -2 -4 -2 426.86 10.2
 -2 -4 -2 425.56 10.2
 -2 -4 -2 425.26 10.2
 -2 -4 -2 406.16 10.3
 2 4 2 439.16 9.6
 -3 -4 -2 349.47 9
 -3 -4 -2 367.06 8.3
 -3 -4 -2 363.86 8.9
 -3 -4 -2 366.46 8.4
 -3 -4 -2 360.16 9
 -3 -4 -2 349.27 9.1
 3 4 2 367.36 8.5
 3 4 2 377.06 8.6
 -4 -4 -2 927.71 20.7
 -4 -4 -2 941.11 21
 -4 -4 -2 920.41 21.3
 -4 -4 -2 922.11 21.4
 4 4 2 919.51 21
 -5 -4 -2 601.94 13.7
 -5 -4 -2 587.94 14.5
 -5 -4 -2 642.34 14.5
 -5 -4 -2 589.44 14.1
 5 4 2 584.14 14.1
 -6 -4 -2 529.55 12.9
 -6 -4 -2 538.45 12.4
 -6 -4 -2 528.85 13.2
 6 4 2 518.45 12.9
 -7 -4 -2 1.7 1.9
 -7 -4 -2 3.9 1.3
 -7 -4 -2 3.3 1.7
 7 4 2 4.4 1.8
 -8 -4 -2 -2.4 1.4
 -8 -4 -2 1.7 2.1
 -8 -4 -2 -0.3 1.8
 8 4 2 -1.6 1.9
 -9 -4 -2 174.28 5.7
 -9 -4 -2 185.48 6.6
 9 4 2 176.38 6.7
 9 4 2 173.28 6.7
 -10 -4 -2 388.56 11
 -10 -4 -2 354.26 9.8
 10 4 2 363.96 10.9
 10 4 2 360.56 11
 -11 -4 -2 388.96 10.8
 -11 -4 -2 387.86 12
 11 4 2 406.56 12.1
 11 4 2 411.76 12.2
 -12 -4 -2 228.98 7.7
 -12 -4 -2 219.08 9.1
 12 4 2 213.68 8.9
 12 4 2 227.18 9.2
 -13 -4 -2 101.69 7.5
 -13 -4 -2 96.89 7.7
 -13 -4 -2 97.29 5.9
 13 4 2 103.09 7.6
 -14 -4 -2 74.39 7.8
 -14 -4 -2 77.79 6.1
 -14 -4 -2 73.59 7.9
 14 4 2 60.89 8.1
 -15 -4 -2 43.8 8.1
 -15 -4 -2 38.2 6.1
 15 4 2 30.8 5.3
 -16 -4 -2 1.8 4.9
 -16 -4 -2 -0.3 3.8
 16 4 2 -2.9 4.9
 -17 -4 -2 10.2 4.4
 17 4 2 9 5.6
 16 -5 -2 18.6 5.8
 -16 5 2 14.2 5.2
 -16 5 2 24.1 6.5
 15 -5 -2 6.1 5.1
 -15 5 2 12.6 5.6
 -15 5 2 11.4 4.7
 14 -5 -2 45 7.3
 14 -5 -2 36.5 5.5
 -14 5 2 38.3 5.8
 -14 5 2 39.5 5
 13 -5 -2 8.8 3.8
 13 -5 -2 2.6 4.1
 -13 5 2 8.8 3.7
 -13 5 2 4 4.2
 12 -5 -2 300.27 11.5
 12 -5 -2 307.87 11.3
 -12 5 2 304.17 10.6
 -12 5 2 306.97 11.9
 11 -5 -2 675.23 18.7
 11 -5 -2 681.63 18.6
 11 -5 -2 679.03 18.5
 -11 5 2 676.03 17.8
 -11 5 2 687.13 19.1
 10 -5 -2 414.66 12.4
 10 -5 -2 412.36 12.5
 10 -5 -2 405.86 12.5
 -10 5 2 399.26 12.8
 -10 5 2 399.46 11.7
 9 -5 -2 34.1 4.7
 9 -5 -2 31.2 4.9
 9 -5 -2 26.2 5
 -9 5 2 27.9 5.1
 -9 5 2 31.2 4.2
 8 -5 -2 53.49 4
 8 -5 -2 57.89 4.7
 8 -5 -2 47.5 4.7
 8 -5 -2 51.19 4.8
 -8 5 2 48.2 5
 -8 5 2 58.59 4.2
 7 -5 -2 65.79 4.5
 7 -5 -2 74.19 4.6
 7 -5 -2 74.89 3.9
 -7 5 2 72.89 4
 -7 5 2 69.59 4.7
 6 -5 -2 405.66 10.4
 6 -5 -2 412.16 10.8
 6 -5 -2 405.16 11.1
 -6 5 2 400.16 10.4
 -6 5 2 390.96 10.9
 5 -5 -2 451.75 11.5
 5 -5 -2 454.05 11.3
 5 -5 -2 455.05 11.9
 -5 5 2 457.85 11.3
 -5 5 2 452.65 11.7
 4 -5 -2 1030.2 23.4
 4 -5 -2 1028.6 23.6
 4 -5 -2 1030.3 23.9
 4 -5 -2 1018.4 24.1
 -4 5 2 1030.4 23.5
 -4 5 2 1015.3 23.8
 3 -5 -2 1099.79 25
 3 -5 -2 1106.39 24.9
 3 -5 -2 1065.69 25.2
 3 -5 -2 1082.59 24.6
 3 -5 -2 1076.49 24.4
 -3 5 2 1076.99 24.8
 -3 5 2 1078.19 24.6
 2 -5 -2 707.33 16.1
 2 -5 -2 694.93 16.6
 2 -5 -2 690.83 15.7
 2 -5 -2 675.13 16.3
 2 -5 -2 706.63 15.9
 2 -5 -2 681.03 16.3
 -2 5 2 707.23 15.9
 -2 5 2 689.53 16
 1 -5 -2 442.86 10.2
 1 -5 -2 432.46 10.8
 1 -5 -2 433.56 11.1
 1 -5 -2 452.45 10.3
 1 -5 -2 434.06 10.8
 1 -5 -2 445.96 10.5
 -1 5 2 447.96 10.3
 -1 5 2 443.26 10.3
 -1 5 2 438.36 10.3
 -1 5 2 459.75 10.4
 0 -5 -2 1 1.2
 0 -5 -2 0.9 1.1
 0 -5 -2 2.3 1.3
 0 -5 -2 -0.2 1.2
 0 -5 -2 0.1 1
 0 5 2 1.1 0.6
 0 5 2 2.9 0.8
 -1 -5 -2 48.8 2.7
 -1 -5 -2 51.79 2.7
 -1 -5 -2 51.39 2.5
 -1 -5 -2 51.89 3
 -1 -5 -2 52.99 2.5
 -2 -5 -2 1610.54 36
 -2 -5 -2 1618.24 36
 -2 -5 -2 1574.64 36.2
 -2 -5 -2 1619.84 36.1
 -3 -5 -2 195.48 5.4
 -3 -5 -2 192.38 5.4
 -3 -5 -2 180.58 5.5
 -3 -5 -2 184.98 5.4
 3 5 2 172.08 4.6
 3 5 2 185.28 4.7
 -4 -5 -2 703.93 16.4
 -4 -5 -2 699.63 15.8
 -4 -5 -2 666.83 16.5
 -4 -5 -2 696.33 16.4
 -4 -5 -2 683.33 15.6
 4 5 2 692.83 15.8
 4 5 2 682.33 15.8
 -5 -5 -2 12.4 2
 -5 -5 -2 13.3 2
 -5 -5 -2 15.1 1.6
 -5 -5 -2 10.9 1.8
 5 5 2 14.3 2.2
 5 5 2 10.7 1.4
 -6 -5 -2 449.56 11
 -6 -5 -2 448.86 11.5
 -6 -5 -2 449.26 11.5
 -6 -5 -2 443.76 10.6
 6 5 2 443.36 11.1
 6 5 2 439.66 11.1
 -7 -5 -2 725.43 17.9
 -7 -5 -2 727.43 17.9
 -7 -5 -2 729.03 16.9
 -7 -5 -2 739.93 17.5
 7 5 2 714.63 17.5
 7 5 2 744.13 17.5
 -8 -5 -2 308.57 9.3
 -8 -5 -2 311.57 8.9
 -8 -5 -2 325.47 8.2
 8 5 2 316.47 9
 8 5 2 309.87 9
 -9 -5 -2 105.29 5.8
 -9 -5 -2 104.79 5.2
 -9 -5 -2 104.39 4.3
 9 5 2 103.89 5.3
 9 5 2 101.89 5.4
 -10 -5 -2 357.36 10.6
 -10 -5 -2 362.56 9.6
 -10 -5 -2 354.46 11
 10 5 2 353.96 10.6
 10 5 2 339.47 10.7
 -11 -5 -2 125.69 7.1
 -11 -5 -2 131.09 6.8
 -11 -5 -2 122.09 5.5
 11 5 2 126.19 6.9
 -12 -5 -2 329.37 11.2
 -12 -5 -2 338.97 11.5
 -12 -5 -2 325.37 9.9
 12 5 2 343.47 11.4
 -13 -5 -2 196.68 7.7
 -13 -5 -2 217.88 9.7
 -13 -5 -2 189.58 9.3
 13 5 2 207.18 9.5
 -14 -5 -2 139.19 9
 -14 -5 -2 139.29 7.1
 14 5 2 137.89 9.2
 -15 -5 -2 29.9 4.1
 -15 -5 -2 29.6 5.4
 15 5 2 24.9 5.2
 -16 -5 -2 0.1 5.1
 -16 -5 -2 -3.6 5.9
 -16 -5 -2 5 3.9
 16 5 2 -2.5 4.9
 -17 -5 -2 17.2 8.9
 -17 -5 -2 18.5 6.8
 17 5 2 10.6 5.7
 16 -6 -2 -4.8 5.4
 -16 6 2 -1.9 4.9
 -16 6 2 0.4 5.8
 15 -6 -2 3 5
 -15 6 2 -2.3 5.2
 -15 6 2 0.8 4.6
 14 -6 -2 -0.5 4.6
 -14 6 2 9 4.3
 -14 6 2 4.4 5.1
 13 -6 -2 55.79 7.2
 13 -6 -2 48.8 8
 -13 6 2 39.1 4.7
 -13 6 2 47.7 8.4
 12 -6 -2 181.38 9
 12 -6 -2 207.18 9.6
 -12 6 2 183.98 9.8
 -12 6 2 182.08 8.6
 11 -6 -2 679.23 18.4
 11 -6 -2 661.63 18.4
 11 -6 -2 661.93 18.4
 -11 6 2 658.63 18.9
 -11 6 2 671.03 17.7
 10 -6 -2 438.86 13.2
 10 -6 -2 429.86 13.2
 10 -6 -2 434.36 13.1
 -10 6 2 438.86 12.4
 -10 6 2 423.06 13.4
 9 -6 -2 154.58 7.2
 9 -6 -2 169.88 7.2
 9 -6 -2 160.88 7.2
 -9 6 2 157.68 7.6
 -9 6 2 161.68 6.6
 8 -6 -2 37.7 4.7
 8 -6 -2 39.5 4.6
 8 -6 -2 45.6 3.9
 -8 6 2 36.6 4.8
 -8 6 2 38.1 4
 7 -6 -2 1.7 1.5
 7 -6 -2 -0.9 2.1
 7 -6 -2 1.1 2
 -7 6 2 0.8 2
 -7 6 2 0.6 2.2
 6 -6 -2 230.68 7.6
 6 -6 -2 229.98 7.2
 6 -6 -2 232.08 6.8
 6 -6 -2 221.98 7.5
 -6 6 2 227.88 6.9
 -6 6 2 225.88 7.5
 5 -6 -2 24 3.2
 5 -6 -2 26.3 2.6
 5 -6 -2 26.4 3.1
 5 -6 -2 25.2 3.4
 -5 6 2 20.2 2.9
 -5 6 2 17.2 2.2
 4 -6 -2 1616.24 37.2
 4 -6 -2 1611.74 36.4
 4 -6 -2 1647.74 36.6
 4 -6 -2 1590.34 37
 -4 6 2 1614.14 36.8
 -4 6 2 1637.94 36.5
 3 -6 -2 441.36 11.4
 3 -6 -2 445.26 10.6
 3 -6 -2 448.16 10.8
 3 -6 -2 437.86 11.5
 3 -6 -2 458.95 11.1
 -3 6 2 448.86 10.8
 -3 6 2 434.06 11
 2 -6 -2 1152.18 26.4
 2 -6 -2 1116.39 26.6
 2 -6 -2 1080.19 26.2
 2 -6 -2 1191.28 25.9
 2 -6 -2 1138.39 25.7
 2 -6 -2 1141.59 25.8
 -2 6 2 1155.78 25.9
 -2 6 2 1157.58 25.8
 1 -6 -2 195.78 6.2
 1 -6 -2 196.08 5.4
 1 -6 -2 187.38 5.8
 1 -6 -2 194.88 4.9
 1 -6 -2 191.08 5.7
 1 -6 -2 198.48 5.1
 -1 6 2 196.38 5.1
 -1 6 2 204.28 5.1
 -1 6 2 199.48 5.1
 -1 6 2 200.38 5.2
 0 -6 -2 370.66 9.7
 0 -6 -2 381.16 10.1
 0 -6 -2 392.06 9.6
 0 -6 -2 381.86 9.4
 0 -6 -2 359.16 9.6
 0 6 2 408.96 8.9
 -1 -6 -2 31.4 2.6
 -1 -6 -2 41.8 2.8
 -1 -6 -2 37.8 2.6
 -1 -6 -2 39.9 2.6
 -2 -6 -2 3.3 1.4
 -2 -6 -2 3 1.4
 -2 -6 -2 5.6 1.6
 -2 -6 -2 5.5 1.5
 -3 -6 -2 80.89 3.7
 -3 -6 -2 84.59 3.7
 -3 -6 -2 85.09 3.6
 -3 -6 -2 89.09 3.7
 3 6 2 81.19 2.6
 3 6 2 83.19 2.6
 -4 -6 -2 106.39 4.3
 -4 -6 -2 104.19 4.4
 -4 -6 -2 109.49 3.3
 -4 -6 -2 108.69 4.3
 4 6 2 116.69 3.9
 4 6 2 108.09 3.4
 -5 -6 -2 503.05 13.1
 -5 -6 -2 518.25 13
 -5 -6 -2 516.25 13
 -5 -6 -2 515.85 12.2
 -5 -6 -2 511.95 12
 5 6 2 523.05 12.3
 -6 -6 -2 1265.87 30.1
 -6 -6 -2 1303.17 29.2
 -6 -6 -2 1326.57 29.5
 -6 -6 -2 1304.27 30.2
 6 6 2 1296.67 29.6
 -7 -6 -2 430.56 10.9
 -7 -6 -2 428.36 11.7
 -7 -6 -2 426.76 11.6
 -7 -6 -2 436.86 10.5
 7 6 2 426.36 11.1
 -8 -6 -2 652.33 16.1
 -8 -6 -2 658.73 16.8
 -8 -6 -2 652.73 15.5
 -8 -6 -2 656.63 16.8
 8 6 2 660.13 16.3
 -9 -6 -2 2.5 2.1
 -9 -6 -2 1.7 3
 -9 -6 -2 3.1 1.8
 -9 -6 -2 4.9 2.7
 9 6 2 5.5 2.3
 -10 -6 -2 118.49 6.7
 -10 -6 -2 117.89 6.7
 -10 -6 -2 105.19 4.8
 -10 -6 -2 108.79 5.8
 10 6 2 105.19 6.2
 -11 -6 -2 398.36 12.4
 -11 -6 -2 373.86 12.3
 -11 -6 -2 402.56 11.8
 -11 -6 -2 381.16 10.6
 11 6 2 391.76 12
 -12 -6 -2 231.38 7.7
 -12 -6 -2 233.08 9.7
 -12 -6 -2 236.68 9.1
 -12 -6 -2 209.48 9.7
 12 6 2 227.88 9.4
 -13 -6 -2 127.19 8.7
 -13 -6 -2 125.39 6.3
 -13 -6 -2 143.99 8.7
 13 6 2 123.19 8.2
 -14 -6 -2 216.38 10.5
 -14 -6 -2 198.08 8.2
 -14 -6 -2 215.48 10.6
 14 6 2 208.48 10.4
 -15 -6 -2 84.69 9
 -15 -6 -2 71.79 9.2
 -15 -6 -2 79.89 6.7
 15 6 2 73.69 9
 -16 -6 -2 30.9 6
 -16 -6 -2 36.9 6.8
 16 6 2 28.9 5.8
 -17 -6 -2 79.99 13.9
 -17 -6 -2 64.39 10.7
 17 6 2 55.29 10.6
 16 -7 -2 17.4 6
 -16 7 2 19.8 5.7
 -16 7 2 23 6.4
 15 -7 -2 -5.6 4.9
 -15 7 2 -0.5 5.4
 -15 7 2 3.3 4.8
 14 -7 -2 7.1 4.6
 14 -7 -2 3.2 4.7
 -14 7 2 -1.7 4.9
 -14 7 2 2.6 4.3
 13 -7 -2 90.19 7.9
 13 -7 -2 66.89 8.6
 -13 7 2 86.39 7.5
 -13 7 2 85.19 9.3
 12 -7 -2 118.89 7.9
 12 -7 -2 110.39 8.3
 12 -7 -2 99.09 7.9
 -12 7 2 103.09 8.7
 -12 7 2 109.19 7.2
 11 -7 -2 498.05 14.9
 11 -7 -2 481.05 14.8
 11 -7 -2 489.35 14.7
 -11 7 2 483.95 14
 -11 7 2 480.85 15.3
 10 -7 -2 371.56 12.1
 10 -7 -2 380.26 12.1
 10 -7 -2 383.46 12.1
 -10 7 2 359.16 12.5
 -10 7 2 389.86 11.4
 9 -7 -2 367.86 11.7
 9 -7 -2 361.46 11.4
 9 -7 -2 383.16 11.5
 9 -7 -2 366.16 11.6
 -9 7 2 380.36 11
 -9 7 2 370.66 11.9
 8 -7 -2 140.99 6.7
 8 -7 -2 144.59 6.6
 8 -7 -2 152.48 6.7
 8 -7 -2 148.19 5.8
 -8 7 2 143.39 7
 -8 7 2 149.09 6.1
 7 -7 -2 45.9 4.4
 7 -7 -2 36.7 3.6
 7 -7 -2 34.8 4.3
 7 -7 -2 35.3 4.5
 -7 7 2 40.8 4.6
 -7 7 2 48 4
 6 -7 -2 44.2 4.4
 6 -7 -2 46.2 4.3
 6 -7 -2 42.9 3.3
 6 -7 -2 44.9 4
 -6 7 2 41 4.2
 -6 7 2 40.9 3.7
 5 -7 -2 22.4 3.5
 5 -7 -2 21.7 2.6
 5 -7 -2 22.2 3.7
 5 -7 -2 14.4 2.1
 -5 7 2 22.3 3
 -5 7 2 16 2.3
 4 -7 -2 112.79 5
 4 -7 -2 115.69 4.9
 4 -7 -2 110.99 4.2
 4 -7 -2 115.59 4.6
 4 -7 -2 108.29 3.8
 -4 7 2 104.89 4.1
 -4 7 2 109.19 4.6
 3 -7 -2 292.97 7.8
 3 -7 -2 296.27 8.7
 3 -7 -2 304.47 8
 3 -7 -2 314.57 8.7
 3 -7 -2 299.37 7.7
 -3 7 2 296.67 8.1
 -3 7 2 295.57 7.8
 2 -7 -2 783.92 19.1
 2 -7 -2 796.22 18.5
 2 -7 -2 773.02 19.2
 2 -7 -2 787.82 19.5
 2 -7 -2 814.62 18.5
 2 -7 -2 796.42 18.3
 -2 7 2 808.22 18.5
 -2 7 2 836.82 18.7
 -2 7 2 813.22 18.6
 1 -7 -2 2138.29 47.7
 1 -7 -2 2135.19 47.4
 1 -7 -2 2088.49 48.1
 1 -7 -2 2115.79 47.2
 1 -7 -2 2077.99 48.2
 1 -7 -2 2140.59 48.6
 -1 7 2 2153.08 47.5
 -1 7 2 2164.38 47.5
 -1 7 2 2229.28 47.6
 0 -7 -2 171.18 5.4
 0 -7 -2 163.58 5.1
 0 -7 -2 154.98 4.9
 0 -7 -2 156.48 5.7
 0 -7 -2 158.98 5.4
 0 7 2 159.28 4.2
 0 7 2 160.28 4.2
 -1 -7 -2 2094.89 47.8
 -1 -7 -2 2094.79 47.9
 -1 -7 -2 2188.38 47.6
 -1 -7 -2 2120.79 47.5
 -2 -7 -2 12.3 1.9
 -2 -7 -2 15.3 2.6
 -2 -7 -2 10.4 1.8
 -2 -7 -2 9.8 1.8
 -3 -7 -2 330.47 8.9
 -3 -7 -2 323.67 8.7
 -3 -7 -2 319.07 8.9
 -3 -7 -2 324.47 8.7
 -4 -7 -2 143.39 5.2
 -4 -7 -2 147.99 5.3
 -4 -7 -2 134.59 5.3
 4 7 2 141.79 4.1
 4 7 2 140.79 4.1
 -5 -7 -2 1086.99 25.3
 -5 -7 -2 1027.4 25.4
 -5 -7 -2 1094.59 25.6
 -5 -7 -2 1115.09 24.5
 5 7 2 1082.39 24.6
 -6 -7 -2 172.58 5.1
 -6 -7 -2 175.28 6.3
 -6 -7 -2 175.98 6.5
 -6 -7 -2 181.38 6.4
 -6 -7 -2 178.08 5.3
 6 7 2 181.58 5.5
 -7 -7 -2 1458.35 33.8
 -7 -7 -2 1451.75 33
 -7 -7 -2 1428.56 32.7
 -7 -7 -2 1481.95 34
 7 7 2 1428.66 33.1
 -8 -7 -2 363.96 9.8
 -8 -7 -2 372.16 10.8
 -8 -7 -2 350.06 10.8
 -8 -7 -2 358.36 9.3
 8 7 2 370.26 10.1
 -9 -7 -2 104.09 4.4
 -9 -7 -2 104.09 5
 -9 -7 -2 108.19 6.5
 -9 -7 -2 93.29 6.1
 9 7 2 99.59 5.4
 -11 -7 -2 101.19 5.2
 -11 -7 -2 98.79 7.3
 -11 -7 -2 106.99 7.2
 11 7 2 108.89 6.7
 -12 -7 -2 31.9 4.7
 -12 -7 -2 47.6 7
 -12 -7 -2 33.1 5.1
 12 7 2 34.2 6.2
 -13 -7 -2 296.77 12.2
 -13 -7 -2 317.77 9.9
 -13 -7 -2 340.17 12.4
 13 7 2 313.57 11.7
 -14 -7 -2 128.29 6.9
 -14 -7 -2 123.69 9.3
 -14 -7 -2 121.49 9.7
 14 7 2 136.39 9.2
 -15 -7 -2 197.88 11.6
 -15 -7 -2 223.88 11.7
 15 7 2 197.88 11.1
 -16 -7 -2 97.89 10.5
 -16 -7 -2 84.89 10.4
 16 7 2 93.69 10.1
 15 -8 -2 16.1 5.5
 -15 8 2 20.9 5.2
 -15 8 2 17.5 6
 14 -8 -2 -4.7 4.7
 14 -8 -2 3.1 4.6
 -14 8 2 3.5 5.2
 -14 8 2 2.2 4.4
 13 -8 -2 -1 4.3
 13 -8 -2 3.4 4.2
 -13 8 2 -2.8 4.6
 -13 8 2 -2.5 3.9
 12 -8 -2 50.99 7.2
 12 -8 -2 37.2 4.9
 12 -8 -2 33.7 4.7
 12 -8 -2 49.99 6.8
 -12 8 2 45.3 6.7
 -12 8 2 44.1 8.1
 11 -8 -2 255.87 10.2
 11 -8 -2 256.57 10.5
 11 -8 -2 265.17 10.4
 11 -8 -2 259.47 10.3
 -11 8 2 272.27 11
 -11 8 2 238.58 9.4
 10 -8 -2 483.95 14.6
 10 -8 -2 480.85 14.6
 10 -8 -2 499.85 14.5
 10 -8 -2 490.25 14.5
 -10 8 2 485.05 15
 -10 8 2 480.45 13.9
 9 -8 -2 638.54 16.9
 9 -8 -2 628.64 17.2
 9 -8 -2 618.64 16.9
 9 -8 -2 605.14 17.1
 -9 8 2 627.34 17.3
 -9 8 2 624.94 16.4
 8 -8 -2 126.79 6.6
 8 -8 -2 123.29 5.5
 8 -8 -2 119.89 6.5
 8 -8 -2 118.19 6.3
 -8 8 2 122.19 6.7
 -8 8 2 124.19 6
 7 -8 -2 61.29 4.8
 7 -8 -2 62.39 5.2
 7 -8 -2 64.09 5.2
 7 -8 -2 62.79 4
 -7 8 2 54.19 5.1
 -7 8 2 57.49 4.5
 6 -8 -2 -4.1 2
 6 -8 -2 1.8 2.3
 6 -8 -2 2.7 2.4
 6 -8 -2 -0.3 1.5
 -6 8 2 -1.1 2.2
 -6 8 2 -3 1.9
 5 -8 -2 6.1 2.3
 5 -8 -2 6.3 2
 5 -8 -2 5 2.3
 5 -8 -2 5.2 1.4
 -5 8 2 7.4 2
 -5 8 2 6.9 2.2
 3 -8 -2 353.06 9
 3 -8 -2 329.37 9.8
 3 -8 -2 357.76 9.1
 3 -8 -2 364.06 10.2
 3 -8 -2 367.46 9.4
 3 -8 -2 359.96 10.3
 -3 8 2 367.06 9.5
 -3 8 2 363.66 9.2
 2 -8 -2 1654.73 37.4
 2 -8 -2 1634.24 36.5
 2 -8 -2 1538.35 37.2
 2 -8 -2 1615.14 36.3
 2 -8 -2 1607.84 36.6
 2 -8 -2 1603.64 37.7
 -2 8 2 1676.43 36.8
 -2 8 2 1637.84 36.6
 -2 8 2 1646.24 36.5
 1 -8 -2 1615.64 36.5
 1 -8 -2 1605.04 35.9
 1 -8 -2 1561.64 37.1
 1 -8 -2 1610.94 37.5
 1 -8 -2 1575.14 37
 1 -8 -2 1643.34 36.2
 -1 8 2 1669.33 36.4
 -1 8 2 1653.73 36.3
 -1 8 2 1638.34 36.2
 -2 -8 -2 61.49 3.5
 -2 -8 -2 52.99 3.7
 -2 -8 -2 50.89 3.5
 -2 -8 -2 58.49 3.8
 -3 -8 -2 21.9 3.3
 -3 -8 -2 19.9 3.2
 -3 -8 -2 18.5 3.2
 -3 -8 -2 19.7 2.4
 -4 -8 -2 43.8 3.6
 -4 -8 -2 45.6 3.8
 -4 -8 -2 46.7 3.9
 4 8 2 43.7 2.3
 4 8 2 40.3 2.3
 -5 -8 -2 172.78 6.1
 -5 -8 -2 161.28 6.2
 -5 -8 -2 162.68 6.2
 5 8 2 165.68 4.9
 -6 -8 -2 457.75 12.6
 -6 -8 -2 451.05 12.6
 -6 -8 -2 451.25 12.3
 -6 -8 -2 478.35 11.3
 6 8 2 459.85 11.4
 -7 -8 -2 807.72 20
 -7 -8 -2 803.62 20.2
 -7 -8 -2 802.32 19
 7 8 2 810.82 19.2
 -8 -8 -2 1208.08 28.4
 -8 -8 -2 1230.48 29.6
 -8 -8 -2 1241.78 28.2
 -8 -8 -2 1208.28 29.4
 8 8 2 1248.78 28.7
 -9 -8 -2 387.46 12.6
 -9 -8 -2 417.06 12.5
 -9 -8 -2 410.86 10.8
 -9 -8 -2 413.36 12.5
 9 8 2 430.16 11.6
 -10 -8 -2 4 2.3
 -10 -8 -2 -0.9 3.7
 -10 -8 -2 7 3.5
 -11 -8 -2 3.3 2.5
 -11 -8 -2 6.5 4.2
 -11 -8 -2 8.1 3.9
 11 8 2 1.2 3
 -12 -8 -2 91.19 8.1
 -12 -8 -2 69.49 5.5
 -12 -8 -2 71.29 7.8
 12 8 2 68.59 6.8
 -13 -8 -2 128.19 9.4
 -13 -8 -2 122.99 6.8
 -13 -8 -2 148.09 9.5
 13 8 2 141.09 8.7
 -14 -8 -2 113.79 9.9
 -14 -8 -2 129.99 9.9
 14 8 2 115.59 8.9
 -15 -8 -2 169.18 11.5
 -15 -8 -2 160.08 11.3
 15 8 2 158.98 10.4
 -16 -8 -2 160.88 12
 -16 -8 -2 176.78 11.8
 16 8 2 152.78 11.3
 15 -9 -2 91.69 10.5
 -15 9 2 93.09 9.4
 -15 9 2 83.49 11.3
 14 -9 -2 3.6 4.8
 14 -9 -2 8.4 5
 -14 9 2 17 4.9
 -14 9 2 12.9 5.5
 13 -9 -2 3.2 4.5
 13 -9 -2 10.4 4.6
 -13 9 2 8.7 5
 -13 9 2 13.2 4.4
 12 -9 -2 54.79 7.8
 12 -9 -2 68.29 7.5
 12 -9 -2 63.19 8
 -12 9 2 60.79 7.1
 -12 9 2 51.69 8.3
 11 -9 -2 13.1 3.9
 11 -9 -2 3.8 3.7
 -11 9 2 10.9 3.6
 -11 9 2 10 4
 10 -9 -2 299.77 11.3
 10 -9 -2 298.67 11.2
 10 -9 -2 313.87 11
 10 -9 -2 310.37 11.1
 -10 9 2 304.27 10.4
 -10 9 2 320.97 11.6
 9 -9 -2 351.26 11.9
 9 -9 -2 393.16 11.7
 9 -9 -2 386.26 11.6
 9 -9 -2 344.37 11.9
 -9 9 2 344.97 11
 -9 9 2 313.07 11.8
 8 -9 -2 726.63 18.8
 8 -9 -2 679.03 17.3
 8 -9 -2 683.73 18.5
 8 -9 -2 700.53 18
 -8 9 2 686.33 17.7
 -8 9 2 673.13 18.4
 7 -9 -2 239.68 8.3
 7 -9 -2 252.67 9.1
 7 -9 -2 245.38 7.6
 7 -9 -2 248.28 9
 -7 9 2 242.88 8.8
 -7 9 2 257.87 8.1
 6 -9 -2 238.08 7
 6 -9 -2 231.98 6.5
 6 -9 -2 216.58 8.3
 6 -9 -2 234.58 8.6
 6 -9 -2 215.38 7.6
 -6 9 2 228.08 7.5
 -6 9 2 233.38 8.1
 5 -9 -2 446.06 11.8
 5 -9 -2 451.85 11.2
 5 -9 -2 460.05 12.8
 5 -9 -2 441.86 12.9
 -5 9 2 446.36 12.3
 -5 9 2 470.65 11.9
 4 -9 -2 62.79 3.9
 4 -9 -2 57.99 4.9
 4 -9 -2 71.59 4.9
 4 -9 -2 60.89 3.3
 4 -9 -2 59.69 3.7
 -4 9 2 62.09 3.8
 -4 9 2 66.59 4.2
 3 -9 -2 287.57 9.4
 3 -9 -2 279.07 8.8
 3 -9 -2 302.77 9.3
 3 -9 -2 309.47 8.2
 3 -9 -2 303.47 8.1
 3 -9 -2 311.17 8
 -3 9 2 307.67 8.2
 -3 9 2 319.27 8.5
 2 -9 -2 2065.89 48
 2 -9 -2 2084.09 46.9
 2 -9 -2 2106.39 46.7
 2 -9 -2 2069.09 48.3
 2 -9 -2 2021.9 47.8
 2 -9 -2 2083.69 47
 -2 9 2 2173.58 47.1
 -2 9 2 2148.89 47.2
 -2 9 2 2129.89 47
 1 -9 -2 1259.07 30.4
 1 -9 -2 1287.27 29.2
 1 -9 -2 1284.17 29.6
 1 -9 -2 1250.67 30.7
 1 -9 -2 1258.77 30.2
 -1 9 2 1354.06 29.5
 -1 9 2 1327.47 29.3
 -1 9 2 1331.87 29.3
 0 -9 -2 699.03 17.5
 0 -9 -2 692.03 16.9
 0 -9 -2 721.63 17.2
 0 -9 -2 679.53 17.5
 0 9 2 729.43 16.3
 0 9 2 709.73 16.2
 -1 -9 -2 652.23 16.1
 -1 -9 -2 612.94 15.9
 -1 -9 -2 661.13 15.7
 -1 -9 -2 623.64 15.6
 1 9 2 636.44 14.6
 -2 -9 -2 113.79 4.8
 -2 -9 -2 113.39 5.1
 -2 -9 -2 109.69 4.8
 -2 -9 -2 112.79 5.2
 -3 -9 -2 4.9 2.2
 -3 -9 -2 2.2 2.1
 -3 -9 -2 3.2 2.1
 -3 -9 -2 4.3 2.2
 3 9 2 4.5 1.1
 -4 -9 -2 11.6 2.5
 -4 -9 -2 10.1 2.4
 -4 -9 -2 12.9 2.5
 4 9 2 8.9 1.2
 4 9 2 12.1 2.1
 -5 -9 -2 59.99 4.8
 -5 -9 -2 60.69 4.7
 -5 -9 -2 61.19 4.6
 5 9 2 64.19 3.1
 -6 -9 -2 337.57 9.9
 -6 -9 -2 325.87 10.1
 -6 -9 -2 323.57 10.2
 6 9 2 331.37 8.7
 -7 -9 -2 438.16 12.6
 -7 -9 -2 422.96 12.2
 -7 -9 -2 429.56 12.5
 7 9 2 436.76 11.2
 -8 -9 -2 439.56 12.8
 -8 -9 -2 450.35 13.1
 8 9 2 434.26 11.8
 -9 -9 -2 838.12 21.3
 -9 -9 -2 812.12 21.4
 9 9 2 833.62 20.4
 -10 -9 -2 93.59 7.4
 -10 -9 -2 101.99 5.3
 -10 -9 -2 97.79 7.5
 10 9 2 116.49 6.2
 -11 -9 -2 111.99 5.8
 -11 -9 -2 101.69 8.1
 -11 -9 -2 102.99 8
 11 9 2 108.09 6.9
 -12 -9 -2 4.4 4.6
 -12 -9 -2 8.1 3.6
 -12 -9 -2 7 4.9
 12 9 2 8.5 3.6
 -13 -9 -2 24.6 5.3
 -13 -9 -2 23.4 5.9
 13 9 2 18.1 4.3
 -14 -9 -2 85.49 10
 -14 -9 -2 102.59 9.9
 14 9 2 92.99 8.6
 -15 -9 -2 260.67 13.1
 -15 -9 -2 254.87 12.9
 15 9 2 222.58 11.7
 -16 -9 -2 149.39 11.9
 -16 -9 -2 138.49 12.1
 16 9 2 123.39 10.9
 14 -10 -2 108.49 9.8
 14 -10 -2 110.39 12.5
 -14 10 2 90.59 9.2
 -14 10 2 115.49 11.2
 13 -10 -2 17.5 5.3
 13 -10 -2 10.6 4.9
 -13 10 2 22.8 4.9
 -13 10 2 13.4 5.3
 12 -10 -2 0 4.4
 12 -10 -2 -6.6 4
 12 -10 -2 -0.1 6.6
 -12 10 2 -4.1 4.4
 -12 10 2 -3.4 3.7
 11 -10 -2 62.49 7.2
 11 -10 -2 57.09 7.2
 11 -10 -2 61.69 7.4
 11 -10 -2 64.59 7.9
 -11 10 2 82.49 8.3
 -11 10 2 74.89 7.1
 10 -10 -2 296.47 10.9
 10 -10 -2 298.37 11.2
 10 -10 -2 294.07 10.9
 10 -10 -2 310.57 11.6
 -10 10 2 283.07 11.3
 -10 10 2 285.87 10.4
 9 -10 -2 268.27 10.5
 9 -10 -2 260.97 10
 9 -10 -2 289.37 10.8
 9 -10 -2 262.67 9.9
 -9 10 2 278.87 10.7
 -9 10 2 278.97 9.6
 8 -10 -2 733.43 18.5
 8 -10 -2 770.22 20.1
 8 -10 -2 759.22 19.2
 8 -10 -2 731.83 19.9
 -8 10 2 722.23 18.9
 -8 10 2 748.53 19.8
 7 -10 -2 95.39 5.9
 7 -10 -2 110.59 6.6
 7 -10 -2 106.99 4.4
 7 -10 -2 109.49 7
 -7 10 2 109.99 6.5
 -7 10 2 102.29 5.6
 6 -10 -2 419.76 12.6
 6 -10 -2 409.66 10.6
 6 -10 -2 418.66 12.6
 6 -10 -2 407.16 11.5
 -6 10 2 412.76 11.5
 -6 10 2 425.06 12.1
 5 -10 -2 100.19 6.1
 5 -10 -2 89.59 5.9
 5 -10 -2 87.59 4.1
 5 -10 -2 80.19 4.8
 -5 10 2 87.09 5.3
 -5 10 2 90.99 4.8
 4 -10 -2 70.99 3.8
 4 -10 -2 74.69 4.2
 4 -10 -2 73.79 4.1
 4 -10 -2 72.89 5.5
 4 -10 -2 74.99 5.6
 -4 10 2 71.59 4.6
 -4 10 2 78.19 4.2
 3 -10 -2 230.58 6.8
 3 -10 -2 224.48 8.5
 3 -10 -2 226.08 7.8
 3 -10 -2 234.18 6.9
 3 -10 -2 232.38 6.7
 3 -10 -2 238.78 8.3
 -3 10 2 249.28 7.3
 -3 10 2 239.38 7
 2 -10 -2 293.67 9.6
 2 -10 -2 305.57 9.5
 2 -10 -2 299.87 7.9
 2 -10 -2 300.67 7.7
 2 -10 -2 287.27 9.2
 2 -10 -2 299.47 8.2
 -2 10 2 297.37 8.3
 -2 10 2 299.77 8.1
 -2 10 2 302.07 8.2
 1 -10 -2 780.82 20.4
 1 -10 -2 779.22 20
 1 -10 -2 798.22 19.1
 1 -10 -2 770.62 19.8
 -1 10 2 875.01 19.3
 -1 10 2 805.62 18.7
 -1 10 2 805.22 18.8
 0 -10 -2 766.32 18.3
 0 -10 -2 753.02 18
 0 -10 -2 739.53 18.8
 0 -10 -2 719.33 18.6
 0 10 2 765.82 17.3
 0 10 2 738.53 17.2
 -1 -10 -2 827.02 21
 -1 -10 -2 882.01 20.7
 -1 -10 -2 854.91 20.6
 -1 -10 -2 861.71 21.2
 1 10 2 865.91 19.5
 -2 -10 -2 252.77 8.3
 -2 -10 -2 246.88 8.2
 -2 -10 -2 257.97 7.8
 -2 -10 -2 254.67 7.9
 -3 -10 -2 318.77 9.7
 -3 -10 -2 328.77 9.3
 -3 -10 -2 315.97 9.8
 -3 -10 -2 322.27 9.5
 3 10 2 322.07 7.9
 -4 -10 -2 84.49 5.3
 -4 -10 -2 78.59 5.1
 -4 -10 -2 82.89 5
 4 10 2 78.09 3.1
 -5 -10 -2 44.8 4.9
 -5 -10 -2 59.39 5.2
 -5 -10 -2 54.89 4.6
 5 10 2 51.09 3.1
 -6 -10 -2 916.71 22.9
 -6 -10 -2 945.71 23.2
 -6 -10 -2 930.91 23.4
 6 10 2 933.91 21.7
 -7 -10 -2 885.41 22.2
 -7 -10 -2 850.21 21.6
 -7 -10 -2 852.61 21.8
 7 10 2 843.02 20.4
 -8 -10 -2 326.97 10.9
 -8 -10 -2 313.87 10.7
 8 10 2 307.37 9.2
 -9 -10 -2 239.98 9.5
 -9 -10 -2 241.98 9.7
 9 10 2 223.58 8
 -10 -10 -2 216.78 9.7
 -10 -10 -2 225.78 10
 10 10 2 224.28 8.3
 -11 -10 -2 58.09 7.8
 -11 -10 -2 71.89 8.1
 11 10 2 57.99 6.3
 -12 -10 -2 7.1 4.6
 -12 -10 -2 3 5.1
 12 10 2 3.3 3.6
 -13 -10 -2 17.6 5.8
 -13 -10 -2 13.7 5.1
 13 10 2 6.9 4
 -14 -10 -2 14.5 5.7
 -14 -10 -2 6.4 6.2
 14 10 2 4.1 4.3
 -15 -10 -2 109.89 11.1
 -15 -10 -2 122.29 11.2
 15 10 2 97.19 9.6
 14 -11 -2 126.79 10.8
 -14 11 2 134.19 9.9
 -14 11 2 133.69 11.7
 13 -11 -2 26.6 5.8
 -13 11 2 19.5 5
 -13 11 2 18 5.7
 12 -11 -2 1.5 4.7
 -12 11 2 -2.2 4.5
 -12 11 2 -5.5 4
 11 -11 -2 8.9 4.7
 11 -11 -2 14.3 4.3
 -11 11 2 7.1 4.1
 -11 11 2 11.9 4.5
 10 -11 -2 112.99 8.3
 10 -11 -2 104.69 8
 10 -11 -2 129.99 9.1
 10 -11 -2 113.99 8.3
 -10 11 2 116.39 7.4
 -10 11 2 117.89 8.4
 9 -11 -2 269.17 10.8
 9 -11 -2 283.37 11.2
 9 -11 -2 277.07 10.3
 9 -11 -2 276.37 10.1
 -9 11 2 288.07 10
 -9 11 2 272.07 10.9
 8 -11 -2 693.83 18.2
 8 -11 -2 686.03 19.3
 8 -11 -2 688.73 18.2
 8 -11 -2 702.03 19.2
 -8 11 2 695.13 18.9
 -8 11 2 691.73 18.1
 7 -11 -2 230.58 9.5
 7 -11 -2 239.98 9.7
 7 -11 -2 229.08 8.3
 7 -11 -2 233.18 7.6
 -7 11 2 221.88 8.3
 -7 11 2 234.58 9
 6 -11 -2 327.87 9.1
 6 -11 -2 346.57 11.5
 6 -11 -2 330.67 11.2
 6 -11 -2 322.07 10
 -6 11 2 343.97 10.7
 -6 11 2 357.46 10.2
 5 -11 -2 233.68 9.2
 5 -11 -2 226.78 7.7
 5 -11 -2 247.58 9.4
 5 -11 -2 228.48 7.2
 -5 11 2 254.97 8
 -5 11 2 260.97 8.4
 4 -11 -2 45.3 3.7
 4 -11 -2 49 3.7
 4 -11 -2 45.4 5.8
 4 -11 -2 38.8 5.5
 -4 11 2 51.59 4.1
 -4 11 2 48.8 4.5
 3 -11 -2 11.7 3
 3 -11 -2 13 2
 3 -11 -2 13.1 3.1
 3 -11 -2 9.9 3.1
 3 -11 -2 12 2.2
 3 -11 -2 9 1.8
 -3 11 2 11 2.2
 -3 11 2 12.4 2.2
 2 -11 -2 467.75 13.6
 2 -11 -2 460.25 11.9
 2 -11 -2 455.15 11.5
 2 -11 -2 467.95 11.2
 2 -11 -2 445.06 12.9
 2 -11 -2 452.85 13.1
 -2 11 2 474.05 11.8
 -2 11 2 461.85 11.7
 1 -11 -2 499.15 13.8
 1 -11 -2 511.15 13
 1 -11 -2 495.05 14
 -1 11 2 510.35 12.5
 -1 11 2 513.25 12.5
 0 -11 -2 839.72 20.4
 0 -11 -2 886.01 20.8
 0 -11 -2 801.42 20.9
 0 -11 -2 848.72 21.3
 0 11 2 857.61 19.6
 -1 -11 -2 406.26 11.8
 -1 -11 -2 403.06 12
 -1 -11 -2 415.26 11.3
 -1 -11 -2 420.66 11.4
 1 11 2 422.66 10.1
 -2 -11 -2 524.45 14.5
 -2 -11 -2 549.05 14.1
 -2 -11 -2 541.65 14.1
 -2 -11 -2 535.55 14.7
 -3 -11 -2 180.98 7.4
 -3 -11 -2 189.78 6.9
 -3 -11 -2 181.88 7.3
 -4 -11 -2 349.96 10.7
 -4 -11 -2 341.27 10.6
 -4 -11 -2 340.27 10.1
 4 11 2 327.27 8.9
 -5 -11 -2 30.5 5.1
 -5 -11 -2 31.1 5.3
 -5 -11 -2 28.3 4.9
 5 11 2 37.5 3.2
 -6 -11 -2 78.79 6.4
 -6 -11 -2 91.99 6.4
 -6 -11 -2 87.69 6.1
 6 11 2 95.29 4.3
 -7 -11 -2 321.17 11.2
 -7 -11 -2 330.57 10.8
 -7 -11 -2 314.37 11
 7 11 2 325.67 9.1
 -8 -11 -2 197.88 8.8
 -8 -11 -2 184.48 8.7
 -8 -11 -2 184.38 8.3
 8 11 2 180.58 6.8
 -9 -11 -2 693.93 19.1
 -9 -11 -2 715.63 19.6
 9 11 2 710.93 17.9
 -10 -11 -2 165.28 9.2
 -10 -11 -2 171.38 9.6
 10 11 2 158.68 7.4
 -11 -11 -2 275.47 12
 -11 -11 -2 277.57 11.6
 11 11 2 269.37 9.9
 -12 -11 -2 68.19 9.2
 -12 -11 -2 54.89 8.7
 12 11 2 51.09 7
 -13 -11 -2 116.39 10.5
 -13 -11 -2 116.29 10.2
 13 11 2 97.49 8.5
 -14 -11 -2 24.3 6.9
 -14 -11 -2 16.9 6.3
 14 11 2 11.9 4.7
 -15 -11 -2 55.69 8.3
 -15 -11 -2 68.99 11.1
 15 11 2 52.49 9.3
 13 -12 -2 124.39 10.7
 -13 12 2 145.69 11.4
 -13 12 2 132.19 9.8
 12 -12 -2 41.5 6.2
 -12 12 2 53.59 8
 -12 12 2 37.8 5.8
 11 -12 -2 7.8 5
 11 -12 -2 5 5.3
 -11 12 2 -1.1 4
 -11 12 2 5.6 4.6
 10 -12 -2 42.4 8.3
 10 -12 -2 48.1 7.6
 -10 12 2 46 6.8
 -10 12 2 54.89 7.8
 9 -12 -2 172.58 9.2
 9 -12 -2 182.28 9.8
 -9 12 2 182.18 8.5
 -9 12 2 195.48 9.4
 8 -12 -2 143.59 8.5
 8 -12 -2 147.69 9.1
 -8 12 2 141.99 7.3
 -8 12 2 149.49 8.2
 7 -12 -2 379.36 13.2
 7 -12 -2 375.16 12.7
 -7 12 2 389.56 12.2
 -7 12 2 365.16 11.4
 6 -12 -2 600.94 17.3
 6 -12 -2 571.04 14.6
 6 -12 -2 601.04 17.2
 -6 12 2 595.34 15.6
 -6 12 2 588.94 16.1
 5 -12 -2 813.52 19.9
 5 -12 -2 827.82 22.1
 5 -12 -2 846.42 22.2
 -5 12 2 858.01 21
 -5 12 2 838.72 20.6
 4 -12 -2 147.59 7.9
 4 -12 -2 149.49 5.8
 4 -12 -2 157.88 8
 -4 12 2 147.99 6.4
 -4 12 2 145.29 6
 3 -12 -2 39.2 5.7
 3 -12 -2 25.7 3.9
 3 -12 -2 36.3 5.8
 3 -12 -2 23 3.6
 -3 12 2 30.3 4.1
 -3 12 2 38.7 3.9
 2 -12 -2 226.58 6.8
 2 -12 -2 223.28 8.9
 2 -12 -2 224.58 7.4
 2 -12 -2 212.18 8.6
 -2 12 2 229.68 7.1
 -2 12 2 232.88 7
 1 -12 -2 543.25 14.1
 1 -12 -2 555.04 15.3
 1 -12 -2 520.65 14.9
 -1 12 2 560.44 13.5
 -1 12 2 552.14 13.6
 0 -12 -2 949.51 22.9
 0 -12 -2 937.71 22.5
 0 -12 -2 938.31 23.6
 0 -12 -2 886.01 23.1
 0 12 2 935.71 21.7
 0 12 2 967.4 21.9
 -1 -12 -2 257.27 8.4
 -1 -12 -2 251.17 9.1
 -1 -12 -2 249.88 8.3
 -1 -12 -2 252.07 9
 -2 -12 -2 596.44 15.6
 -2 -12 -2 603.44 15.7
 -2 -12 -2 607.54 16.4
 -2 -12 -2 584.74 16.1
 -3 -12 -2 146.19 7
 -3 -12 -2 136.99 7
 -3 -12 -2 144.09 6.5
 -4 -12 -2 150.08 6.9
 -4 -12 -2 163.68 7.4
 -4 -12 -2 160.88 7.6
 -5 -12 -2 7.8 3.5
 -5 -12 -2 8.8 3.3
 -5 -12 -2 3.2 3.4
 5 12 2 10.7 2
 -6 -12 -2 17.5 3.7
 -6 -12 -2 7 3.7
 -6 -12 -2 17.9 4
 6 12 2 15.9 2.3
 -7 -12 -2 78.99 6.9
 -7 -12 -2 70.49 6.7
 -7 -12 -2 87.59 7.2
 7 12 2 82.39 4.8
 -8 -12 -2 261.97 10.7
 -8 -12 -2 274.47 10.7
 -8 -12 -2 260.97 10.3
 8 12 2 258.67 8.5
 -9 -12 -2 301.87 11.8
 -9 -12 -2 288.37 11.4
 9 12 2 300.67 9.6
 -10 -12 -2 251.57 11.1
 -10 -12 -2 248.98 11.2
 10 12 2 234.78 8.9
 -11 -12 -2 164.68 10.2
 -11 -12 -2 169.48 10.3
 11 12 2 161.68 8.2
 -12 -12 -2 80.79 9.5
 -12 -12 -2 89.09 9.7
 12 12 2 73.79 7.5
 -13 -12 -2 65.69 10.1
 -13 -12 -2 84.99 10
 13 12 2 44 8
 -14 -12 -2 8.5 6.3
 -14 -12 -2 3.9 7
 14 12 2 3.6 4.5
 13 -13 -2 77.49 10.6
 -13 13 2 70.99 10.6
 -13 13 2 79.39 9.1
 12 -13 -2 207.18 12.2
 -12 13 2 198.68 11.8
 -12 13 2 197.68 10.5
 11 -13 -2 37.3 6
 -11 13 2 28.9 5.4
 -11 13 2 40.3 5.1
 10 -13 -2 9.5 4.6
 10 -13 -2 12.8 5.2
 -10 13 2 19 4.3
 -10 13 2 15.3 4.4
 9 -13 -2 23.6 4.8
 9 -13 -2 25.6 5.4
 -9 13 2 31.6 4.3
 -9 13 2 23 4.4
 8 -13 -2 222.28 10.7
 8 -13 -2 224.18 10.4
 -8 13 2 225.78 9
 -8 13 2 227.48 9.9
 7 -13 -2 345.17 12.7
 7 -13 -2 375.66 13.1
 -7 13 2 350.56 11.2
 -7 13 2 355.36 11.9
 6 -13 -2 624.24 18
 6 -13 -2 591.64 17.6
 -6 13 2 600.34 16.1
 -6 13 2 596.44 16.6
 5 -13 -2 304.87 11.5
 5 -13 -2 295.07 8.8
 5 -13 -2 293.07 11.5
 -5 13 2 297.57 9.5
 -5 13 2 305.97 9.9
 4 -13 -2 637.64 18
 4 -13 -2 616.14 15.8
 4 -13 -2 618.84 18.1
 -4 13 2 638.24 16.4
 -4 13 2 633.24 16.2
 3 -13 -2 1.7 3.2
 3 -13 -2 3.2 2.5
 3 -13 -2 4.1 3.5
 -3 13 2 0 2.2
 -3 13 2 1.7 2.3
 2 -13 -2 13.1 3.6
 2 -13 -2 13.9 3.6
 2 -13 -2 15.6 2.9
 -2 13 2 14 2.4
 -2 13 2 14.4 2.3
 1 -13 -2 386.36 12.4
 1 -13 -2 375.56 12.1
 1 -13 -2 388.46 10.9
 -1 13 2 388.06 10.2
 -1 13 2 384.36 10.3
 0 -13 -2 289.97 10.2
 0 -13 -2 288.67 9.2
 0 -13 -2 288.97 10.5
 0 -13 -2 285.07 9.5
 0 13 2 291.87 8
 0 13 2 298.37 8.3
 -1 -13 -2 500.75 14.9
 -1 -13 -2 513.35 13.9
 -1 -13 -2 523.75 14.2
 -1 -13 -2 507.15 14.7
 1 13 2 518.75 12.5
 -2 -13 -2 111.89 6.9
 -2 -13 -2 117.79 6.5
 -2 -13 -2 115.79 7.1
 -3 -13 -2 381.06 12
 -3 -13 -2 382.56 12.3
 -3 -13 -2 387.26 11.6
 -4 -13 -2 442.36 13.7
 -4 -13 -2 436.96 13.4
 -4 -13 -2 430.76 12.8
 -5 -13 -2 419.26 13.3
 -5 -13 -2 410.56 12.5
 -5 -13 -2 409.16 13
 5 13 2 394.26 10.7
 -6 -13 -2 -2.7 3.7
 -6 -13 -2 3.7 3.9
 -6 -13 -2 3 3.6
 6 13 2 3.8 2.2
 -7 -13 -2 2.7 4.2
 -7 -13 -2 6.7 3.8
 -7 -13 -2 2.4 4.1
 7 13 2 3.2 2.3
 -8 -13 -2 330.37 12.5
 -8 -13 -2 342.37 12.1
 -8 -13 -2 345.47 12.9
 8 13 2 336.77 10.2
 -9 -13 -2 239.08 10.8
 -9 -13 -2 251.47 11.5
 9 13 2 233.08 8.6
 -10 -13 -2 334.17 13.5
 -10 -13 -2 336.67 13
 10 13 2 318.87 10.8
 -11 -13 -2 127.19 10.2
 -11 -13 -2 120.39 10.2
 11 13 2 123.59 7.7
 -12 -13 -2 125.89 11.3
 -12 -13 -2 139.89 11.1
 12 13 2 110.59 8.3
 -13 -13 -2 71.99 11.2
 -13 -13 -2 96.69 11.2
 13 13 2 66.99 8.4
 -14 -13 -2 44.2 8.3
 -14 -13 -2 37.2 7.4
 14 13 2 25.8 5.2
 12 -14 -2 209.88 12.9
 -12 14 2 234.98 12.6
 -12 14 2 216.08 11.1
 11 -14 -2 61.79 10.2
 -11 14 2 41.1 5.9
 -11 14 2 41.3 5.4
 10 -14 -2 0.5 5.1
 10 -14 -2 2.9 6.4
 -10 14 2 2.6 4.3
 -10 14 2 1.6 4
 9 -14 -2 77.09 8.6
 9 -14 -2 84.09 9.5
 -9 14 2 75.99 7.3
 -9 14 2 76.89 8.2
 8 -14 -2 0.3 4.7
 8 -14 -2 -0.3 4.2
 -8 14 2 2.5 3.5
 -8 14 2 1.6 3.4
 7 -14 -2 141.39 9.4
 7 -14 -2 150.18 9.7
 -7 14 2 157.78 8.4
 -7 14 2 146.29 7.5
 6 -14 -2 234.78 10.6
 6 -14 -2 253.77 11.1
 -6 14 2 224.98 9.3
 -6 14 2 223.38 8.8
 5 -14 -2 688.43 19.9
 5 -14 -2 704.43 20
 5 -14 -2 674.63 19.9
 -5 14 2 690.63 18.2
 -5 14 2 684.43 17.8
 4 -14 -2 644.64 18.9
 4 -14 -2 624.74 16.3
 -4 14 2 652.63 16.7
 -4 14 2 659.03 16.9
 3 -14 -2 313.27 9.6
 3 -14 -2 321.27 11.9
 3 -14 -2 315.67 11.3
 -3 14 2 327.47 9.8
 -3 14 2 306.87 9.5
 2 -14 -2 -3.7 3.6
 2 -14 -2 1.5 2.9
 2 -14 -2 1.5 3.6
 -2 14 2 3.8 2.3
 -2 14 2 4 2.2
 1 -14 -2 75.59 7.2
 1 -14 -2 68.69 6.7
 1 -14 -2 65.49 5.6
 -1 14 2 77.59 4.6
 -1 14 2 80.89 4.5
 0 -14 -2 193.68 8.1
 0 -14 -2 183.78 8.8
 0 -14 -2 196.08 9.1
 0 -14 -2 196.28 7.9
 0 14 2 204.68 6.4
 0 14 2 203.48 6.6
 -1 -14 -2 229.28 9
 -1 -14 -2 228.58 9.7
 -1 -14 -2 229.98 9.5
 -2 -14 -2 274.87 10.6
 -2 -14 -2 267.57 10.3
 -2 -14 -2 277.57 9.7
 -3 -14 -2 154.58 7.7
 -3 -14 -2 162.38 8.5
 -3 -14 -2 177.78 8.6
 -4 -14 -2 280.47 10.8
 -4 -14 -2 271.57 10.1
 -4 -14 -2 253.27 10.4
 -5 -14 -2 391.36 12.5
 -5 -14 -2 380.76 12.9
 -5 -14 -2 389.56 13.3
 -6 -14 -2 38.5 7.2
 -6 -14 -2 34.2 5
 -6 -14 -2 34.1 4.9
 6 14 2 35.8 4.3
 -7 -14 -2 7.2 4.3
 -7 -14 -2 6 4.5
 -7 -14 -2 11.8 4.8
 7 14 2 10.1 2.8
 -8 -14 -2 69.89 8.7
 -8 -14 -2 57.99 8.4
 -8 -14 -2 54.69 7.9
 8 14 2 55.09 5.7
 -9 -14 -2 140.89 10.3
 -9 -14 -2 126.69 9.3
 -9 -14 -2 129.49 9.7
 9 14 2 123.89 7.1
 -10 -14 -2 206.38 11.2
 -10 -14 -2 218.58 12.1
 10 14 2 205.38 8.8
 -11 -14 -2 110.49 10.4
 -11 -14 -2 113.69 10.5
 11 14 2 110.49 7.8
 -12 -14 -2 110.29 11.7
 -12 -14 -2 115.09 11.1
 12 14 2 106.89 8.4
 -13 -14 -2 87.49 11.2
 -13 -14 -2 81.39 12.2
 13 14 2 71.99 8.6
 11 -15 -2 82.09 11.3
 -11 15 2 81.89 8.7
 -11 15 2 73.29 9.9
 10 -15 -2 2.2 5.7
 -10 15 2 5.5 4.4
 -10 15 2 1.9 4.6
 9 -15 -2 16.9 5.9
 9 -15 -2 18.6 5.3
 -9 15 2 17.6 4.5
 -9 15 2 15.7 4.3
 8 -15 -2 14.1 5.5
 8 -15 -2 15.8 5
 -8 15 2 10.8 3.9
 -8 15 2 12.6 4.1
 7 -15 -2 51.89 8.9
 7 -15 -2 38.2 8.1
 -7 15 2 43.5 6.9
 -7 15 2 46.2 6.2
 6 -15 -2 122.29 9.8
 -6 15 2 121.79 7.5
 -6 15 2 97.19 6.9
 5 -15 -2 405.06 14.6
 -5 15 2 402.26 12.5
 -5 15 2 415.56 12.2
 4 -15 -2 284.77 9.6
 4 -15 -2 329.07 12.8
 -4 15 2 307.07 9.9
 -4 15 2 311.17 10.1
 3 -15 -2 406.06 14.2
 3 -15 -2 398.56 13.5
 3 -15 -2 401.86 11.6
 -3 15 2 401.96 11.5
 -3 15 2 395.06 11.7
 2 -15 -2 48.9 7.2
 2 -15 -2 50.79 5.4
 2 -15 -2 53.59 7.5
 -2 15 2 55.69 4.9
 -2 15 2 51.19 4.7
 1 -15 -2 60.89 6.8
 1 -15 -2 60.79 7.6
 1 -15 -2 52.89 5.7
 -1 15 2 59.49 4.6
 -1 15 2 67.39 4.6
 0 -15 -2 114.79 8.3
 0 -15 -2 98.99 7.8
 0 15 2 101.69 5.1
 0 15 2 107.49 4.9
 -1 -15 -2 70.29 6.8
 -1 -15 -2 78.99 7.6
 -1 -15 -2 65.19 7.2
 1 15 2 65.69 4
 1 15 2 64.49 4.4
 -2 -15 -2 148.89 8.7
 -2 -15 -2 162.88 9
 -2 -15 -2 152.78 8.1
 -3 -15 -2 397.66 13.6
 -3 -15 -2 389.16 13
 -3 -15 -2 380.96 12.4
 -4 -15 -2 430.96 14.4
 -4 -15 -2 426.66 13.4
 -4 -15 -2 418.56 14.1
 -5 -15 -2 205.18 10.2
 -5 -15 -2 181.98 9
 -5 -15 -2 184.68 9.8
 -6 -15 -2 51.49 7.9
 -6 -15 -2 49.1 7.9
 -6 -15 -2 47.3 7.7
 -7 -15 -2 29.7 5.4
 -7 -15 -2 29.8 5.5
 -7 -15 -2 31.7 5.6
 7 15 2 26.7 4.8
 -9 -15 -2 15.5 5.2
 -9 -15 -2 22.8 6.1
 -9 -15 -2 17.6 5.7
 9 15 2 6.4 3.4
 -10 -15 -2 139.59 10.7
 -10 -15 -2 135.09 10.9
 10 15 2 132.79 8.1
 -11 -15 -2 85.69 10.8
 -11 -15 -2 81.79 10.5
 11 15 2 77.89 7.8
 -12 -15 -2 148.99 12
 -12 -15 -2 154.48 12.2
 12 15 2 139.39 9.3
 10 -16 -2 79.69 10.8
 -10 16 2 61.79 9.1
 -10 16 2 61.09 8.3
 9 -16 -2 15.4 6.1
 -9 16 2 14.2 4.6
 -9 16 2 12.8 4.5
 8 -16 -2 12.8 5.9
 -8 16 2 10.2 4.1
 -8 16 2 9.3 4.3
 7 -16 -2 6 5.3
 -7 16 2 10.8 3.9
 -7 16 2 13.1 3.9
 6 -16 -2 98.49 9.8
 -6 16 2 94.69 7
 -6 16 2 91.29 7.4
 5 -16 -2 271.27 12.8
 -5 16 2 272.37 10.1
 -5 16 2 276.97 9.8
 4 -16 -2 489.65 16.6
 -4 16 2 472.85 13.7
 -4 16 2 483.85 13.9
 3 -16 -2 388.16 14.5
 3 -16 -2 374.66 13.6
 -3 16 2 383.56 11.5
 -3 16 2 391.96 11.6
 2 -16 -2 71.99 8
 2 -16 -2 67.29 8.6
 -2 16 2 73.09 5.4
 -2 16 2 78.09 5.5
 1 -16 -2 16.6 4.7
 1 -16 -2 22 4.9
 -1 16 2 16.1 2.6
 -1 16 2 15.9 2.8
 0 -16 -2 39.3 7.5
 -1 -16 -2 8.9 4.5
 -1 -16 -2 4.2 4.3
 -1 -16 -2 9.5 4.4
 1 16 2 8 2.3
 -2 -16 -2 42.1 6.7
 -2 -16 -2 36.6 5.4
 -2 -16 -2 47.6 7.9
 2 16 2 39.7 4.1
 -3 -16 -2 110.79 9
 -3 -16 -2 128.79 8
 -3 -16 -2 125.19 8.9
 -4 -16 -2 158.48 9.9
 -4 -16 -2 160.38 9.8
 -4 -16 -2 151.78 8.7
 -5 -16 -2 295.27 12.3
 -5 -16 -2 291.27 12.5
 -5 -16 -2 271.77 11.1
 -6 -16 -2 237.38 11.7
 -6 -16 -2 234.38 11.5
 -6 -16 -2 226.28 10.6
 -7 -16 -2 19.3 5.5
 -7 -16 -2 13.8 5.7
 -7 -16 -2 15 5.6
 -8 -16 -2 18.4 5.9
 -8 -16 -2 26.7 5.8
 -8 -16 -2 30.6 6.4
 -9 -16 -2 10.4 5.5
 -9 -16 -2 10.7 6.3
 -9 -16 -2 13.5 6.3
 -10 -16 -2 5.7 6.7
 -10 -16 -2 8.8 6.5
 -11 -16 -2 29.1 7.5
 -11 -16 -2 28.9 7.7
 9 -17 -2 103.69 12
 -9 17 2 93.59 8.5
 -9 17 2 91.99 9.3
 8 -17 -2 126.49 12.1
 -8 17 2 124.79 9.3
 -8 17 2 149.88 8.9
 7 -17 -2 13.7 6.3
 -7 17 2 4.3 3.9
 -7 17 2 8.3 4.1
 6 -17 -2 27.6 6.4
 -6 17 2 16.7 4
 -6 17 2 27.1 4.3
 5 -17 -2 139.89 11.1
 -5 17 2 112.29 7.8
 -5 17 2 126.29 7.5
 4 -17 -2 183.08 11.5
 -4 17 2 168.38 8.1
 -4 17 2 170.48 8
 3 -17 -2 216.58 11.7
 3 -17 -2 194.48 11
 -3 17 2 196.38 8.2
 -3 17 2 191.18 8.2
 2 -17 -2 159.78 10.3
 2 -17 -2 181.78 11.1
 -2 17 2 174.88 7.3
 -2 17 2 172.08 7.4
 1 -17 -2 118.49 9.5
 1 -17 -2 127.69 10.1
 -1 17 2 110.29 6.1
 -1 17 2 123.49 6.2
 0 -17 -2 1.9 4.8
 0 -17 -2 14 5
 0 17 2 5.6 2.7
 0 17 2 10.1 2.4
 -1 -17 -2 17.9 5.3
 -1 -17 -2 16.1 5.2
 1 17 2 11.5 3.1
 -2 -17 -2 0.6 4.7
 -2 -17 -2 5.3 4.9
 -2 -17 -2 5.2 4.7
 -3 -17 -2 47.1 8.8
 -3 -17 -2 44.5 7.3
 -3 -17 -2 44.4 8.6
 -4 -17 -2 214.98 10.6
 -4 -17 -2 235.88 11.9
 -4 -17 -2 222.38 11.6
 -5 -17 -2 170.18 11.2
 -5 -17 -2 153.28 9.6
 -5 -17 -2 167.68 10.8
 -6 -17 -2 173.28 10.1
 -6 -17 -2 174.08 11.8
 -6 -17 -2 167.48 11.2
 -7 -17 -2 67.59 10.6
 -7 -17 -2 78.09 10
 -7 -17 -2 67.49 9.1
 -8 -17 -2 0.2 5.7
 -8 -17 -2 0.2 6
 -8 -17 -2 2.9 6.3
 -9 -17 -2 36.8 7.3
 -9 -17 -2 71.19 11.1
 -9 -17 -2 40 7.4
 -10 -17 -2 23.7 7.6
 -10 -17 -2 12.8 7
 8 -18 -2 91.39 11.9
 -8 18 2 79.19 8.4
 -8 18 2 86.59 8.8
 7 -18 -2 114.29 12.6
 -7 18 2 107.69 8.6
 -7 18 2 104.79 8.3
 6 -18 -2 0.1 6.1
 -6 18 2 -1.3 3.8
 -6 18 2 -1.5 3.7
 5 -18 -2 -1.9 6
 -5 18 2 2.2 3.5
 -5 18 2 7.7 3.7
 4 -18 -2 104.39 11.1
 -4 18 2 105.29 7.1
 -4 18 2 106.69 7.2
 3 -18 -2 180.78 12.1
 3 -18 -2 167.38 11.2
 -3 18 2 164.88 7.9
 -3 18 2 172.38 8
 2 -18 -2 137.29 11.3
 2 -18 -2 155.78 10.8
 -2 18 2 137.39 7.2
 -2 18 2 151.28 7.2
 1 -18 -2 180.38 11.2
 1 -18 -2 192.48 11.8
 -1 18 2 178.38 7.4
 -1 18 2 167.98 7.5
 0 -18 -2 114.19 10.6
 0 -18 -2 108.49 10
 -1 -18 -2 77.29 9.5
 -1 -18 -2 68.99 9.9
 -2 -18 -2 51.89 9.6
 -2 -18 -2 47.3 9.2
 -2 -18 -2 59.39 7.9
 -3 -18 -2 0.4 5.4
 -3 -18 -2 3.1 5.6
 -3 -18 -2 6.2 5.2
 -4 -18 -2 79.99 10
 -4 -18 -2 73.19 9
 -4 -18 -2 88.59 10.3
 -5 -18 -2 180.08 11
 -5 -18 -2 184.98 11.8
 -5 -18 -2 195.18 12.3
 -6 -18 -2 164.98 11.9
 -6 -18 -2 185.48 12.2
 -6 -18 -2 180.98 11.1
 -7 -18 -2 103.99 11.8
 -7 -18 -2 89.09 11
 -7 -18 -2 97.89 9.9
 -8 -18 -2 98.69 11.6
 -8 -18 -2 96.09 11.9
 -8 -18 -2 93.89 10.4
 -9 -18 -2 12.6 7.2
 -9 -18 -2 17.4 6.6
 -9 -18 -2 8.4 7.2
 6 -19 -2 25.8 7.4
 -6 19 2 30 4.7
 -6 19 2 26.9 4.6
 5 -19 -2 2 6.6
 -5 19 2 -3.1 3.6
 -5 19 2 -2.2 3.6
 4 -19 -2 36.9 7.2
 -4 19 2 38.7 6.6
 -4 19 2 33.5 4.5
 3 -19 -2 40.3 7.2
 3 -19 -2 40 7
 -3 19 2 45 6.3
 -3 19 2 41.8 6.2
 2 -19 -2 60.79 10.2
 2 -19 -2 59.39 10.9
 1 -19 -2 119.89 10.9
 1 -19 -2 129.09 11.8
 0 -19 -2 131.39 11.2
 0 -19 -2 147.99 12
 -1 -19 -2 116.49 11.4
 -1 -19 -2 96.69 10.6
 -2 -19 -2 205.18 12.4
 -2 -19 -2 206.78 13
 -3 -19 -2 8.5 6.2
 -3 -19 -2 8.1 6.2
 -3 -19 -2 8.2 5.9
 -4 -19 -2 5.1 6.4
 -4 -19 -2 4.7 6.1
 -4 -19 -2 -0.5 5.9
 -5 -19 -2 126.89 10.8
 -5 -19 -2 148.29 12.1
 -5 -19 -2 142.69 11.8
 -6 -19 -2 241.68 12.3
 -6 -19 -2 254.27 14.2
 -6 -19 -2 232.68 13.6
 -7 -19 -2 133.29 12.3
 -7 -19 -2 113.29 12.8
 -7 -19 -2 118.69 11.4
 4 -20 -2 -1.1 6.7
 3 -20 -2 33.8 7.9
 2 -20 -2 28.9 7.4
 2 -20 -2 40.6 7.4
 1 -20 -2 107.99 11.6
 1 -20 -2 118.29 12.5
 0 -20 -2 173.18 12.6
 0 -20 -2 172.98 13.3
 -1 -20 -2 177.68 12.7
 -1 -20 -2 182.28 13.9
 -2 -20 -2 129.99 12.4
 -2 -20 -2 112.79 11.8
 -3 -20 -2 17.9 6.8
 -3 -20 -2 11.6 7.1
 -3 -20 -2 7 6.2
 -4 -20 -2 4.3 6.9
 -4 -20 -2 8.9 6.8
 -4 -20 -2 8.3 6.4
 -5 -20 -2 -2.9 6.4
 -5 -20 -2 10.4 7.3
 -5 -20 -2 7.6 6.5
 -3 -19 3 102.99 12.7
 -3 -19 3 111.89 12.1
 -2 -19 3 117.19 12.3
 -2 -19 3 138.39 13
 1 19 -3 81.79 8.1
 -1 -19 3 75.89 11.9
 -1 -19 3 79.59 11.4
 0 19 -3 43.3 6.6
 0 19 -3 48.7 6.8
 0 -19 3 39.8 7.5
 0 -19 3 26.7 7.3
 -1 19 -3 24.4 4.2
 -1 19 -3 21 4.1
 1 -19 3 19.1 7.2
 1 -19 3 10.2 7.2
 -2 19 -3 -4.2 3.7
 -2 19 -3 1.5 3.6
 2 -19 3 0.2 6.5
 2 -19 3 -5.4 6.7
 -3 19 -3 26.3 4.6
 -3 19 -3 31.6 4.6
 3 -19 3 26.9 7.2
 3 -19 3 31.3 7.9
 -6 -18 3 2.5 6.2
 -6 -18 3 -8 6.1
 -6 -18 3 -2.5 7.1
 5 18 -3 7.8 5.2
 -5 -18 3 9.4 5.9
 -5 -18 3 11.3 6.5
 -5 -18 3 13.5 7.1
 4 18 -3 66.19 6.7
 -4 -18 3 101.09 9.4
 -4 -18 3 88.49 11.4
 -4 -18 3 88.49 11.2
 3 18 -3 104.39 7
 -3 -18 3 120.39 11.6
 -3 -18 3 129.39 11.6
 -3 -18 3 104.69 9.3
 2 18 -3 273.37 10
 -2 -18 3 264.97 14.2
 -2 -18 3 273.47 12.2
 -2 -18 3 267.97 13.8
 1 18 -3 91.49 6.9
 -1 -18 3 92.39 10.6
 -1 -18 3 73.09 11.8
 0 18 -3 137.89 7.9
 0 -18 3 116.29 12.3
 0 -18 3 141.59 11.4
 -1 18 -3 159.68 8.4
 -1 18 -3 150.48 8
 1 -18 3 143.09 12.3
 1 -18 3 155.78 11.8
 -2 18 -3 -0.2 3.4
 -2 18 -3 -0.7 3.3
 2 -18 3 -4.7 6.2
 2 -18 3 9.1 6.3
 -3 18 -3 -0.6 3.5
 -3 18 -3 -0.5 3.6
 3 -18 3 1 6.3
 3 -18 3 -3.6 6
 -4 18 -3 124.19 8.1
 -4 18 -3 131.69 8.7
 4 -18 3 117.99 11.3
 4 -18 3 109.69 12.4
 -5 18 -3 163.88 9.7
 -5 18 -3 152.68 9.1
 5 -18 3 178.48 13.7
 -6 18 -3 225.48 10.4
 -6 18 -3 206.88 10.9
 6 -18 3 216.38 15.4
 8 17 -3 210.08 9.9
 -8 -17 3 191.28 14.1
 -8 -17 3 163.48 13.1
 -8 -17 3 201.28 12.3
 7 17 -3 47.2 7.3
 -7 -17 3 41.5 7.2
 -7 -17 3 41.5 7
 -7 -17 3 33.9 7.8
 6 17 -3 13.1 3.7
 -6 -17 3 9.6 6.8
 -6 -17 3 18.8 6.1
 -6 -17 3 6.5 6
 5 17 -3 42.1 6.2
 -5 -17 3 36.2 7.2
 -5 -17 3 38.5 6.3
 -5 -17 3 31.6 6.3
 4 17 -3 17.6 3.5
 -4 -17 3 19.6 6.5
 -4 -17 3 27.8 6.1
 -4 -17 3 25.8 5.7
 3 17 -3 108.59 6.9
 -3 -17 3 125.89 10.9
 -3 -17 3 122.09 11.3
 -3 -17 3 121.29 8.9
 2 17 -3 227.88 8.9
 -2 -17 3 220.68 10.4
 -2 -17 3 220.08 12.3
 -2 -17 3 232.28 12.8
 1 17 -3 132.19 7.3
 -1 -17 3 136.69 11
 -1 -17 3 131.09 10.9
 0 17 -3 182.18 8.3
 0 -17 3 192.58 11.9
 0 -17 3 176.38 11.9
 -1 17 -3 152.58 7.9
 1 -17 3 151.28 11.4
 1 -17 3 128.49 11.5
 -2 17 -3 87.09 6.7
 -2 17 -3 82.29 7.1
 2 -17 3 91.59 10
 2 -17 3 84.09 11.2
 -3 17 -3 16.1 3.8
 -3 17 -3 10.5 3.7
 3 -17 3 12.7 6.1
 3 -17 3 13.8 6.3
 -4 17 -3 26.1 4.2
 -4 17 -3 38.6 7
 4 -17 3 37.9 6.5
 4 -17 3 21.6 6.6
 -5 17 -3 224.58 10.6
 -5 17 -3 217.98 9.9
 5 -17 3 254.47 14.2
 5 -17 3 256.27 13.2
 -6 17 -3 158.08 8.9
 -6 17 -3 165.58 9.8
 6 -17 3 161.58 13.5
 -7 17 -3 289.87 12.5
 -7 17 -3 295.47 11.7
 7 -17 3 286.67 15.9
 -8 17 -3 199.78 11.1
 -8 17 -3 203.38 10.4
 8 -17 3 200.08 14.2
 9 16 -3 207.88 10.8
 -9 -16 3 191.48 12.6
 -9 -16 3 159.48 12.7
 -9 -16 3 209.68 14.2
 8 16 -3 196.28 9.8
 -8 -16 3 169.58 11.6
 -8 -16 3 182.48 13.8
 -8 -16 3 162.68 12.4
 7 16 -3 169.58 8.8
 -7 -16 3 171.38 12.4
 -7 -16 3 172.98 12.1
 -7 -16 3 164.58 10.7
 6 16 -3 50.69 6.7
 -6 -16 3 49.3 8.4
 -6 -16 3 63.09 9.9
 -6 -16 3 67.59 10.3
 5 16 -3 -1.6 3
 -5 -16 3 -8.1 4.7
 -5 -16 3 -0.3 5.7
 -5 -16 3 -5.5 5
 4 16 -3 17.8 3.4
 -4 -16 3 20 6
 -4 -16 3 19.7 5.1
 -4 -16 3 19.6 5.5
 3 16 -3 124.89 6.9
 -3 -16 3 147.09 10.5
 -3 -16 3 145.69 10.3
 -3 -16 3 126.09 8.2
 2 16 -3 101.09 6.4
 -2 -16 3 96.49 9.6
 -2 -16 3 113.59 9.8
 -2 -16 3 89.59 7.9
 1 16 -3 281.17 9.8
 -1 -16 3 290.27 12.6
 -1 -16 3 283.07 10.6
 -1 -16 3 282.67 12.9
 0 16 -3 83.39 6.2
 0 -16 3 76.99 9.5
 0 -16 3 83.29 9.2
 -1 16 -3 376.56 12
 1 -16 3 387.36 15.1
 1 -16 3 386.46 14.3
 -2 16 -3 137.69 7.7
 -2 16 -3 138.19 7.3
 2 -16 3 143.89 10.1
 2 -16 3 143.39 10.8
 -3 16 -3 63.89 6.7
 -3 16 -3 70.59 6.3
 3 -16 3 74.39 9.1
 3 -16 3 70.09 9.9
 -4 16 -3 2.5 3.3
 -4 16 -3 -3.1 3.1
 4 -16 3 0.7 5.5
 4 -16 3 0.1 5.2
 -5 16 -3 103.89 7.2
 -5 16 -3 87.89 7.8
 5 -16 3 83.99 9.6
 5 -16 3 104.49 10.8
 -6 16 -3 236.58 10.6
 -6 16 -3 210.78 9.7
 6 -16 3 230.88 13.9
 -7 16 -3 219.18 10
 -7 16 -3 199.48 10.5
 7 -16 3 228.68 13.6
 -8 16 -3 136.69 9.7
 -8 16 -3 131.59 8.9
 8 -16 3 133.99 12.6
 -9 16 -3 272.87 11.7
 -9 16 -3 267.77 12.6
 9 -16 3 285.37 15.6
 11 15 -3 28.3 5.9
 -11 -15 3 26.5 7.7
 -11 -15 3 22.6 8.1
 10 15 -3 43.7 6
 -10 -15 3 30.3 8
 -10 -15 3 37.8 7.7
 9 15 -3 142.79 9.8
 -9 -15 3 138.09 11.2
 -9 -15 3 116.19 12.1
 -9 -15 3 119.69 11.1
 8 15 -3 247.48 10.8
 -8 -15 3 231.88 12.2
 -8 -15 3 236.18 12.7
 -8 -15 3 242.78 13.6
 7 15 -3 263.37 10.5
 -7 -15 3 244.98 11.8
 -7 -15 3 268.07 12.9
 -7 -15 3 251.27 13.4
 6 15 -3 191.48 8.6
 -6 -15 3 212.28 11.9
 -6 -15 3 193.08 10.1
 -6 -15 3 195.18 11.5
 5 15 -3 32.6 5.9
 -5 -15 3 49.8 8.4
 -5 -15 3 57.69 9
 -5 -15 3 41.8 5.6
 4 15 -3 0.5 2.8
 -4 -15 3 1.2 5
 -4 -15 3 4.4 4.7
 -4 -15 3 3.3 4.4
 3 15 -3 61.69 5.8
 -3 -15 3 62.99 6.9
 -3 -15 3 69.19 8.5
 -3 -15 3 75.09 8.7
 2 15 -3 221.78 8.3
 -2 -15 3 226.78 11.3
 -2 -15 3 223.18 10.9
 -2 -15 3 219.68 9.2
 1 15 -3 257.27 9.1
 -1 -15 3 269.47 11.9
 -1 -15 3 257.67 11.8
 -1 -15 3 267.17 10.1
 0 15 -3 292.67 9.8
 0 -15 3 295.27 12
 0 -15 3 306.17 12.8
 -1 15 -3 348.57 11.1
 1 -15 3 353.56 13.8
 1 -15 3 353.06 13.1
 -2 15 -3 278.37 9.8
 2 -15 3 279.37 11.8
 2 -15 3 265.87 12.4
 -3 15 -3 91.79 6.7
 -3 15 -3 92.09 6.2
 3 -15 3 103.19 9.2
 3 -15 3 100.59 9.4
 -4 15 -3 -0.5 3
 -4 15 -3 -1.8 2.9
 4 -15 3 -0.1 4.8
 4 -15 3 2.7 5
 -5 15 -3 10.1 3.6
 -5 15 -3 5 3.3
 5 -15 3 13.9 5.2
 5 -15 3 11.6 5.4
 -6 15 -3 194.28 8.7
 -6 15 -3 194.38 9.6
 6 -15 3 189.98 12
 -7 15 -3 246.58 10.1
 -7 15 -3 240.58 10.9
 7 -15 3 259.47 13.5
 -8 15 -3 186.78 10.2
 -8 15 -3 182.18 9.4
 8 -15 3 217.38 13
 -9 15 -3 131.99 8.8
 -9 15 -3 116.29 9.5
 9 -15 3 138.29 12.1
 -10 15 -3 106.89 8.8
 -10 15 -3 100.39 9.9
 10 -15 3 107.89 12.8
 12 14 -3 -4.3 5.1
 11 14 -3 16 5.1
 -11 -14 3 9.6 7.3
 -11 -14 3 15.5 7.4
 10 14 -3 9.4 4.8
 -10 -14 3 7.7 6.9
 -10 -14 3 1 6.6
 9 14 -3 37.8 5.3
 -9 -14 3 27.9 5.7
 -9 -14 3 33.9 6.7
 -9 -14 3 42.8 7.2
 8 14 -3 251.37 11.1
 -8 -14 3 242.48 11.8
 -8 -14 3 251.57 12.2
 -8 -14 3 249.08 13
 7 14 -3 351.86 12.2
 -7 -14 3 346.57 13.1
 -7 -14 3 361.56 13.9
 -7 -14 3 354.66 14.5
 6 14 -3 308.17 10.7
 -6 -14 3 298.77 13
 -6 -14 3 297.87 11.5
 -6 -14 3 297.37 12.3
 5 14 -3 87.49 6.3
 -5 -14 3 91.19 8.4
 -5 -14 3 97.29 9.1
 -5 -14 3 94.19 7.6
 4 14 -3 3.7 2.8
 -4 -14 3 7.6 4.3
 -4 -14 3 10.6 4.8
 -4 -14 3 11.9 4.5
 3 14 -3 -1.4 2.5
 -3 -14 3 3.3 4.3
 -3 -14 3 3.1 4.2
 -3 -14 3 3.2 3.9
 2 14 -3 92.39 5.8
 -2 -14 3 88.59 6.6
 -2 -14 3 89.89 8
 -2 -14 3 102.49 8.1
 -1 -14 3 92.39 8.1
 -1 -14 3 88.69 7.9
 0 14 -3 322.77 10.1
 0 -14 3 340.57 12.6
 0 -14 3 305.57 10.4
 0 -14 3 320.87 11.9
 -1 14 -3 280.97 9.4
 1 -14 3 284.67 11.2
 1 -14 3 291.47 11.9
 -2 14 -3 527.25 14.7
 2 -14 3 545.75 16.2
 2 -14 3 515.55 16.8
 -3 14 -3 168.28 7.8
 -3 14 -3 177.78 7.4
 3 -14 3 174.68 10.2
 3 -14 3 181.88 9.5
 -4 14 -3 141.69 7.6
 -4 14 -3 142.99 6.9
 4 -14 3 162.78 9.4
 4 -14 3 148.09 9.9
 -5 14 -3 15.6 3.4
 -5 14 -3 12.4 3.5
 5 -14 3 13 4.6
 5 -14 3 11 5
 -6 14 -3 49.6 6.8
 -6 14 -3 46.2 5.9
 6 -14 3 48.6 9
 -7 14 -3 101.49 8.2
 -7 14 -3 117.19 7.4
 7 -14 3 110.59 10.3
 -8 14 -3 233.78 10
 -8 14 -3 240.28 10.9
 8 -14 3 258.87 13.6
 -9 14 -3 88.79 8.7
 -9 14 -3 86.29 7.8
 9 -14 3 90.19 11.5
 -10 14 -3 168.88 9.5
 -10 14 -3 164.88 10.7
 10 -14 3 162.18 12.7
 -11 14 -3 187.88 11.6
 -11 14 -3 197.68 10.4
 11 -14 3 206.38 14.2
 12 13 -3 45.1 6.1
 -12 -13 3 52.09 8.5
 -12 -13 3 42.6 8.3
 11 13 -3 8.5 4.6
 -11 -13 3 7 6.8
 -11 -13 3 17.1 7.1
 10 13 -3 13.3 4.3
 -10 -13 3 6.7 6.4
 -10 -13 3 4.8 6.1
 9 13 -3 99.09 8.4
 -9 -13 3 111.19 10.8
 -9 -13 3 100.39 9
 -9 -13 3 101.29 9.4
 8 13 -3 160.88 9.1
 -8 -13 3 165.68 10.2
 -8 -13 3 166.88 11.1
 -8 -13 3 157.58 10
 7 13 -3 272.17 10.6
 -7 -13 3 276.67 12.4
 -7 -13 3 275.17 11.8
 -7 -13 3 261.27 11.1
 6 13 -3 292.87 10.4
 -6 -13 3 280.07 10.8
 -6 -13 3 298.67 11.7
 -6 -13 3 294.97 12.3
 5 13 -3 210.98 8.3
 -5 -13 3 220.48 10.2
 -5 -13 3 206.08 10.4
 -5 -13 3 199.78 9.1
 4 13 -3 57.29 5.1
 -4 -13 3 52.19 6.2
 -4 -13 3 63.99 7.4
 -4 -13 3 57.79 7.6
 3 13 -3 12.2 2.7
 -3 -13 3 21.8 4
 -3 -13 3 18.8 4.2
 -3 -13 3 14.7 4.3
 2 13 -3 65.19 5.1
 -2 -13 3 65.69 7
 -2 -13 3 86.99 7.5
 -2 -13 3 70.29 6
 0 13 -3 259.17 8.6
 0 -13 3 256.17 8.8
 0 -13 3 255.77 10.3
 0 -13 3 272.47 10.7
 -1 13 -3 95.79 5.6
 1 -13 3 107.99 7.5
 1 -13 3 103.99 8.1
 -2 13 -3 615.14 16.5
 2 -13 3 630.84 18.5
 2 -13 3 636.64 17.8
 -3 13 -3 370.96 11.5
 3 -13 3 386.46 13.6
 3 -13 3 387.06 12.7
 -4 13 -3 157.58 6.7
 -4 13 -3 133.99 7.2
 4 -13 3 155.18 8.5
 4 -13 3 152.28 9.3
 -5 13 -3 76.19 6.6
 -5 13 -3 80.49 5.8
 5 -13 3 93.39 7.4
 5 -13 3 90.69 8.5
 -6 13 -3 -0.4 2.9
 -6 13 -3 -1.4 3.1
 6 -13 3 1.7 4.5
 -7 13 -3 6.2 3.4
 -7 13 -3 12.1 3.7
 7 -13 3 16.4 5.2
 -8 13 -3 284.27 11.4
 -8 13 -3 274.87 10.4
 8 -13 3 293.27 13.3
 -9 13 -3 155.98 8.6
 -9 13 -3 147.89 9.5
 9 -13 3 168.38 11.7
 -10 13 -3 358.06 14
 -10 13 -3 355.46 12.8
 10 -13 3 384.86 15.7
 -11 13 -3 225.08 12.1
 -11 13 -3 239.68 10.9
 11 -13 3 259.27 14.3
 -12 13 -3 129.79 9.5
 -12 13 -3 144.59 11.1
 12 -13 3 131.29 12.4
 13 12 -3 3.7 5.1
 -13 -12 3 1.7 7.3
 -13 -12 3 9.7 7.4
 12 12 -3 85.39 9.4
 -12 -12 3 66.69 11.7
 -12 -12 3 85.49 10.8
 11 12 -3 48.6 8.2
 -11 -12 3 46.1 7.6
 -11 -12 3 55.29 9.5
 10 12 -3 17.2 4.2
 -10 -12 3 14.6 6.1
 -10 -12 3 9.2 6
 9 12 -3 2.2 3.6
 -9 -12 3 6 4.2
 -9 -12 3 0.8 5.4
 -9 -12 3 0.3 5.4
 8 12 -3 100.29 7.4
 -8 -12 3 97.59 9.5
 -8 -12 3 111.09 8.2
 -8 -12 3 86.99 8.2
 7 12 -3 316.37 10.9
 -7 -12 3 289.77 11.3
 -7 -12 3 309.17 12.5
 -7 -12 3 314.27 11.8
 6 12 -3 268.57 9.9
 -6 -12 3 269.87 10.8
 -6 -12 3 259.27 11.3
 -6 -12 3 264.57 10.3
 5 12 -3 289.27 9.7
 -5 -12 3 276.47 11.2
 -5 -12 3 276.77 9.9
 -5 -12 3 297.37 11
 4 12 -3 251.37 8.5
 -4 -12 3 251.87 10.3
 -4 -12 3 253.97 10.2
 -4 -12 3 243.98 9.1
 3 12 -3 4.7 2.3
 -3 -12 3 1.4 3.3
 -3 -12 3 4.7 3.8
 -3 -12 3 4.8 3.3
 2 12 -3 174.58 6.8
 -2 -12 3 180.88 8.4
 -2 -12 3 176.78 8.4
 -2 -12 3 178.48 7.2
 1 12 -3 11 2.4
 -1 -12 3 9.5 3.7
 -1 -12 3 9.9 3.2
 -1 -12 3 12.5 3.6
 0 12 -3 50.09 4.5
 0 -12 3 48.7 6.1
 0 -12 3 46 4.7
 0 -12 3 50.49 6.4
 -1 12 -3 290.97 9
 1 -12 3 277.87 10.2
 1 -12 3 297.17 10.9
 -2 12 -3 177.08 6.9
 2 -12 3 172.98 8.8
 2 -12 3 169.18 8.1
 -3 12 -3 232.48 8.3
 3 -12 3 231.18 9.3
 3 -12 3 241.88 10.2
 -4 12 -3 456.25 13.1
 -4 12 -3 452.45 12.6
 4 -12 3 469.65 14
 4 -12 3 439.96 14.6
 -5 12 -3 153.48 7.4
 -5 12 -3 151.18 6.7
 5 -12 3 156.38 8
 5 -12 3 146.69 9
 -6 12 -3 109.79 6.2
 -6 12 -3 99.79 7
 6 -12 3 112.39 8.7
 -7 12 -3 -0.1 3.3
 -7 12 -3 5.4 3.1
 7 -12 3 5.8 4.6
 -8 12 -3 21.8 4.1
 -8 12 -3 19 3.7
 8 -12 3 15.5 5.2
 -9 12 -3 82.39 6.9
 -9 12 -3 67.09 7.8
 9 -12 3 83.99 9.3
 -10 12 -3 191.98 9.3
 -10 12 -3 181.08 10.3
 10 -12 3 198.28 11.8
 -11 12 -3 188.88 9.4
 -11 12 -3 183.38 11
 11 -12 3 180.48 12.4
 -12 12 -3 269.97 11.4
 -12 12 -3 240.48 12.6
 12 -12 3 256.57 13.8
 -13 12 -3 55.59 8.5
 -13 12 -3 47.1 6.5
 13 -12 3 44.9 7.3
 14 11 -3 40.5 6.1
 -14 -11 3 46.1 8.5
 -14 -11 3 49.1 8.5
 13 11 -3 150.78 10.5
 -13 -11 3 141.59 12.7
 -13 -11 3 147.09 11.9
 12 11 -3 56.69 8.6
 -12 -11 3 54.29 7.7
 -12 -11 3 64.69 10.8
 11 11 -3 172.98 9.5
 -11 -11 3 169.18 10.7
 -11 -11 3 145.69 11.6
 10 11 -3 81.19 7.5
 -10 -11 3 71.79 9.8
 -10 -11 3 74.59 8.7
 9 11 -3 2.3 3.4
 -9 -11 3 -7.3 4.9
 -9 -11 3 -1.6 5
 8 11 -3 13.1 3.4
 -8 -11 3 8.6 4.8
 -8 -11 3 16 4.1
 -8 -11 3 14.8 5
 7 11 -3 82.69 6.3
 -7 -11 3 76.59 8.1
 -7 -11 3 85.59 7.2
 -7 -11 3 80.39 6.9
 6 11 -3 195.28 8
 -6 -11 3 200.38 9.6
 -6 -11 3 204.98 8.8
 -6 -11 3 202.48 9
 5 11 -3 399.86 12
 -5 -11 3 403.06 13.3
 -5 -11 3 411.76 12.3
 -5 -11 3 405.86 12.9
 4 11 -3 245.18 8.4
 -4 -11 3 243.48 9.3
 -4 -11 3 248.28 9.5
 -4 -11 3 238.78 8.6
 3 11 -3 121.59 5.6
 -3 -11 3 115.69 6
 -3 -11 3 123.39 6.9
 -3 -11 3 114.89 7.1
 2 11 -3 193.08 7.1
 -2 -11 3 221.28 8.7
 -2 -11 3 218.58 7.5
 -2 -11 3 215.08 8.7
 1 11 -3 16.6 2.4
 -1 -11 3 14.5 3
 -1 -11 3 21.9 3.6
 -1 -11 3 16.3 3.5
 0 11 -3 1.1 2
 0 -11 3 2.9 2.5
 0 -11 3 2.5 2.1
 0 -11 3 4.6 3.1
 0 -11 3 2.4 3.1
 -1 11 -3 201.68 7
 1 -11 3 201.38 6.6
 1 -11 3 200.68 8.6
 1 -11 3 190.88 6.8
 1 -11 3 196.08 8.1
 -2 11 -3 1179.88 27.8
 2 -11 3 1216.68 29.4
 2 -11 3 1141.19 28.5
 2 -11 3 1155.48 27.4
 -3 11 -3 177.68 6.9
 3 -11 3 182.08 8.6
 3 -11 3 176.18 8
 3 -11 3 174.58 6.7
 -4 11 -3 213.38 7.4
 -4 11 -3 213.68 7.9
 4 -11 3 206.88 8.5
 4 -11 3 204.48 9.4
 4 -11 3 213.38 7.6
 -5 11 -3 247.08 8.3
 -5 11 -3 255.57 9.1
 5 -11 3 256.17 8.8
 5 -11 3 260.07 10.5
 5 -11 3 271.67 9.7
 -6 11 -3 11 3.1
 -6 11 -3 13.9 2.9
 6 -11 3 8 4.1
 6 -11 3 10 3
 -7 11 -3 5.7 2.9
 -7 11 -3 2.5 3.1
 7 -11 3 8.2 4.2
 7 -11 3 4.5 3.1
 -8 11 -3 39 6.6
 -8 11 -3 38.3 5.6
 8 -11 3 32.6 5.2
 8 -11 3 39.9 6.1
 -9 11 -3 22.8 3.8
 -9 11 -3 16.2 4.1
 9 -11 3 18.2 3.9
 9 -11 3 14.5 5
 -10 11 -3 89.39 8.4
 -10 11 -3 99.79 7.4
 10 -11 3 99.49 8.1
 10 -11 3 102.99 9.5
 -11 11 -3 278.67 10.9
 -11 11 -3 261.17 12.1
 11 -11 3 274.97 13.1
 11 -11 3 272.47 11.7
 -12 11 -3 207.18 10
 -12 11 -3 186.68 11.3
 12 -11 3 180.68 12.1
 -13 11 -3 69.79 9.8
 -13 11 -3 90.89 8.7
 13 -11 3 87.59 10.8
 -14 11 -3 43 6.7
 -14 11 -3 42.9 5.8
 14 -11 3 59.99 11.2
 14 10 -3 12.7 5.3
 -14 -10 3 17.3 7.6
 -14 -10 3 19.5 7.2
 13 10 -3 79.89 9.1
 -13 -10 3 82.39 11.4
 -13 -10 3 66.29 10.7
 12 10 -3 14.4 4.5
 -12 -10 3 16.1 6.5
 -12 -10 3 15.2 6.3
 11 10 -3 415.56 13.7
 -11 -10 3 412.26 15.8
 -11 -10 3 409.66 14.8
 10 10 -3 68.19 7
 -10 -10 3 58.19 8.3
 -10 -10 3 60.79 9.1
 9 10 -3 381.46 12
 -9 -10 3 376.26 13
 -9 -10 3 366.56 13.9
 8 10 -3 48.2 5.7
 -8 -10 3 38.4 7.5
 -8 -10 3 50.59 6.3
 -8 -10 3 34.7 5
 7 10 -3 43.1 5.3
 -7 -10 3 45.9 6
 -7 -10 3 38.2 6
 -7 -10 3 55.69 7.1
 6 10 -3 208.48 7.8
 -6 -10 3 210.28 8.6
 -6 -10 3 206.48 9.3
 -6 -10 3 211.58 8.4
 5 10 -3 730.43 18.6
 -5 -10 3 740.23 19.3
 -5 -10 3 725.63 19.6
 -5 -10 3 727.73 18.6
 4 10 -3 91.69 5.4
 -4 -10 3 84.49 5.6
 -4 -10 3 89.09 6.6
 -4 -10 3 97.79 5.9
 -4 -10 3 87.49 5
 3 10 -3 315.47 9.4
 -3 -10 3 327.87 10.3
 -3 -10 3 310.97 8.7
 -3 -10 3 316.57 9.5
 -3 -10 3 320.27 10.6
 2 10 -3 73.29 4.5
 -2 -10 3 92.19 5.7
 -2 -10 3 82.19 5.7
 -2 -10 3 80.99 4.1
 -2 -10 3 83.79 4.9
 1 10 -3 567.84 14.7
 1 10 -3 593.34 15.5
 -1 -10 3 570.94 14.7
 -1 -10 3 598.34 14.3
 -1 -10 3 590.54 15.9
 -1 -10 3 581.84 15.7
 0 10 -3 0.2 2.1
 0 10 -3 0.1 1.8
 0 -10 3 0.4 2.6
 0 -10 3 0.7 2.3
 0 -10 3 -0.6 2.6
 0 -10 3 -0.9 1.7
 -1 10 -3 -0.2 1.7
 -1 10 -3 -0.8 2
 1 -10 3 2.7 2.7
 1 -10 3 -2.1 2.3
 1 -10 3 2.8 1.9
 1 -10 3 -1 2.7
 1 -10 3 1.9 2.2
 -2 10 -3 182.28 6.6
 -2 10 -3 176.88 6.4
 2 -10 3 168.88 7.2
 2 -10 3 172.48 6.1
 2 -10 3 167.58 7.6
 -3 10 -3 553.74 14.6
 -3 10 -3 550.44 14.3
 3 -10 3 530.25 14.8
 3 -10 3 543.55 14
 3 -10 3 555.74 15.7
 -4 10 -3 164.88 6.7
 -4 10 -3 173.48 6.9
 4 -10 3 170.68 7.4
 4 -10 3 171.88 6.6
 4 -10 3 164.98 8
 -5 10 -3 170.88 7.2
 -5 10 -3 161.88 6.4
 -5 10 -3 178.38 7.2
 5 -10 3 176.88 7
 5 -10 3 170.98 7.2
 5 -10 3 158.58 8.3
 -6 10 -3 225.88 8.7
 -6 10 -3 221.68 7.7
 -6 10 -3 210.98 8.4
 6 -10 3 211.18 8.1
 6 -10 3 203.78 9.5
 -7 10 -3 365.56 11.9
 -7 10 -3 396.76 14.2
 -7 10 -3 366.86 11.1
 7 -10 3 376.76 11.5
 7 -10 3 368.86 13
 -8 10 -3 36 6.3
 -8 10 -3 34.1 5.4
 8 -10 3 45.2 6.1
 8 -10 3 47.8 7.3
 -9 10 -3 29.3 3.9
 -9 10 -3 23.4 4.2
 9 -10 3 25.7 4
 9 -10 3 25.6 4.9
 -10 10 -3 2.6 3.5
 -10 10 -3 5.2 3.8
 10 -10 3 6.8 3.8
 10 -10 3 10.4 4.8
 -11 10 -3 310.17 11.3
 -11 10 -3 303.07 12.5
 11 -10 3 321.67 12
 11 -10 3 307.17 13.5
 -12 10 -3 190.58 11.1
 -12 10 -3 205.48 9.8
 12 -10 3 214.18 11.9
 12 -10 3 216.98 10.7
 -13 10 -3 132.19 9.2
 -13 10 -3 134.79 10.4
 13 -10 3 129.59 11.3
 13 -10 3 144.29 10.1
 -14 10 -3 76.79 8.7
 -14 10 -3 83.79 10.5
 14 -10 3 71.19 9.9
 14 -10 3 67.89 10.8
 15 9 -3 3.2 5.4
 -15 -9 3 -1.3 7.2
 -15 -9 3 3.9 7.6
 14 9 -3 38.8 6
 -14 -9 3 62.09 11.9
 -14 -9 3 56.39 8.4
 -14 -9 3 52.39 8.1
 13 9 -3 15.9 4.8
 -13 -9 3 18.3 6.7
 -13 -9 3 15.7 4.5
 -13 -9 3 2.4 6.2
 12 9 -3 161.98 9.5
 -12 -9 3 155.98 10.7
 -12 -9 3 181.28 11.7
 11 9 -3 269.37 10.7
 -11 -9 3 245.18 11.6
 -11 -9 3 256.97 12.5
 10 9 -3 311.67 11
 -10 -9 3 290.97 12.7
 -10 -9 3 330.47 12.1
 9 9 -3 46.7 6
 -9 -9 3 48 7.7
 -9 -9 3 50.39 7
 8 9 -3 9.4 2.9
 -8 -9 3 10.9 4.2
 -8 -9 3 6.9 3.2
 -8 -9 3 6 4.2
 7 9 -3 134.19 6.5
 -7 -9 3 145.99 10
 -7 -9 3 135.79 8.2
 -7 -9 3 142.59 7.1
 -7 -9 3 138.29 7.6
 6 9 -3 43.8 4.6
 -6 -9 3 43.1 5.1
 -6 -9 3 38.8 4.5
 -6 -9 3 45.8 5.5
 -6 -9 3 41.6 6
 5 9 -3 38.6 4.2
 -5 -9 3 40.7 5
 -5 -9 3 37.9 5.7
 -5 -9 3 32 4.7
 -5 -9 3 32.9 4
 4 9 -3 566.74 14.9
 4 9 -3 540.75 14.3
 -4 -9 3 563.74 14.9
 -4 -9 3 531.35 13.7
 -4 -9 3 547.95 15.2
 -4 -9 3 550.34 14.4
 3 9 -3 491.45 12.9
 3 9 -3 482.25 13.3
 -3 -9 3 490.95 12.8
 -3 -9 3 484.25 12.3
 -3 -9 3 491.25 13.4
 -3 -9 3 496.05 13.8
 2 9 -3 508.75 13.6
 2 9 -3 496.55 13.2
 -2 -9 3 522.05 12.9
 -2 -9 3 533.05 14.2
 -2 -9 3 543.15 14.2
 -2 -9 3 520.25 13.2
 1 9 -3 651.63 16.6
 1 9 -3 636.74 16.3
 -1 -9 3 671.13 17
 -1 -9 3 682.63 15.9
 -1 -9 3 674.23 16.2
 -1 -9 3 673.33 17.2
 0 9 -3 46.7 3.7
 0 9 -3 41.9 3.5
 0 -9 3 43.8 4.5
 0 -9 3 43.3 3.3
 0 -9 3 45 3.6
 0 -9 3 44 4.7
 -1 9 -3 5.5 1.8
 -1 9 -3 6 2
 1 -9 3 5.6 2
 1 -9 3 3.9 1.7
 1 -9 3 4.6 2.5
 1 -9 3 7.2 2.3
 1 -9 3 4.7 2.6
 -2 9 -3 20.6 3.4
 -2 9 -3 19.5 3.4
 2 -9 3 19.7 2.9
 2 -9 3 24.2 3.4
 2 -9 3 17.6 3.3
 2 -9 3 20.2 3.1
 -3 9 -3 166.28 6.3
 -3 9 -3 165.88 6.2
 3 -9 3 169.28 7.2
 3 -9 3 162.78 6.6
 3 -9 3 165.28 6
 -4 9 -3 214.78 7.4
 -4 9 -3 214.08 7.5
 4 -9 3 220.78 7.3
 4 -9 3 217.68 8.4
 4 -9 3 223.38 7.9
 -5 9 -3 82.89 5.3
 -5 9 -3 82.99 5.3
 -5 9 -3 86.79 4.7
 5 -9 3 82.39 5.3
 5 -9 3 83.19 6.4
 5 -9 3 85.69 5.4
 -6 9 -3 509.25 14.4
 -6 9 -3 523.15 14.7
 -6 9 -3 509.15 13.6
 6 -9 3 524.25 15.4
 6 -9 3 537.15 14.2
 -7 9 -3 386.66 12.1
 -7 9 -3 373.26 11.6
 -7 9 -3 347.17 10.7
 7 -9 3 376.46 11.4
 7 -9 3 364.26 12.5
 -8 9 -3 672.73 17.7
 -8 9 -3 696.23 18.6
 8 -9 3 668.23 17.6
 8 -9 3 704.53 18.3
 8 -9 3 691.33 19.5
 -9 9 -3 0.2 3
 -9 9 -3 4.8 3.5
 9 -9 3 1.3 3
 9 -9 3 2.6 3.2
 9 -9 3 1.5 4
 -10 9 -3 41.7 6.9
 -10 9 -3 34.8 4.2
 10 -9 3 32.7 5.4
 10 -9 3 40.6 6.6
 -11 9 -3 16.7 3.9
 -11 9 -3 19.3 4.4
 11 -9 3 18.9 4.2
 11 -9 3 16.3 5.2
 -12 9 -3 163.38 10.1
 -12 9 -3 165.88 8.6
 12 -9 3 172.48 9.8
 12 -9 3 164.38 11.1
 -13 9 -3 215.88 10.1
 -13 9 -3 212.98 11.6
 13 -9 3 184.58 11.9
 13 -9 3 194.88 10.9
 -14 9 -3 113.09 9.1
 -14 9 -3 132.19 11.1
 14 -9 3 125.29 11.5
 14 -9 3 121.29 10.3
 -15 9 -3 165.08 10.3
 -15 9 -3 167.18 12.7
 15 -9 3 164.68 11.7
 15 -9 3 173.28 12.3
 15 8 -3 9.2 5.5
 -15 -8 3 10.8 4.9
 -15 -8 3 22.5 7.7
 -15 -8 3 3.6 6.8
 14 8 -3 0.9 4.9
 -14 -8 3 3.8 4.4
 -14 -8 3 3.4 6.5
 -14 -8 3 12.5 6.7
 13 8 -3 5.4 4.4
 -13 -8 3 6.9 4.1
 -13 -8 3 2.7 5.8
 -13 -8 3 6.5 6.2
 12 8 -3 341.17 12.4
 -12 -8 3 341.47 13.4
 -12 -8 3 326.57 14
 -12 -8 3 339.47 11.7
 11 8 -3 228.48 9.9
 -11 -8 3 231.88 10.8
 -11 -8 3 222.68 11.5
 -11 -8 3 239.08 9.3
 10 8 -3 455.45 13.9
 -10 -8 3 463.65 15.5
 -10 -8 3 457.45 13.3
 -10 -8 3 481.05 14.7
 9 8 -3 66.89 6.1
 -9 -8 3 85.29 8
 -9 -8 3 79.39 5.9
 -9 -8 3 75.39 7.2
 -9 -8 3 80.69 7
 8 8 -3 329.77 10.6
 -8 -8 3 345.37 10.7
 -8 -8 3 360.56 11.5
 -8 -8 3 352.96 12.2
 7 8 -3 32.3 4.5
 -7 -8 3 32.9 4.6
 -7 -8 3 24.5 4.1
 -7 -8 3 26 4
 -7 -8 3 29.6 4.7
 6 8 -3 6.4 2.3
 -6 -8 3 8.7 3.4
 -6 -8 3 5.3 2.6
 -6 -8 3 3.8 3.2
 -6 -8 3 4.7 2.4
 5 8 -3 419.86 11.3
 -5 -8 3 403.26 11.3
 -5 -8 3 414.96 12.3
 -5 -8 3 421.06 11.7
 -5 -8 3 426.56 11.8
 4 8 -3 154.58 5.7
 -4 -8 3 153.48 5.6
 -4 -8 3 158.88 6.9
 -4 -8 3 157.68 6.1
 -4 -8 3 157.58 6.3
 3 8 -3 65.99 4.4
 3 8 -3 56.99 4.1
 -3 -8 3 54.69 4.1
 -3 -8 3 54.89 4.6
 -3 -8 3 58.89 4.2
 -3 -8 3 50.79 3.4
 2 8 -3 242.68 7.6
 2 8 -3 228.38 7.2
 -2 -8 3 240.88 7.8
 -2 -8 3 251.67 7.2
 -2 -8 3 238.08 6.9
 -2 -8 3 235.38 8
 1 8 -3 865.21 21.7
 1 8 -3 913.81 22.1
 -1 -8 3 929.51 21.4
 -1 -8 3 942.21 22.4
 -1 -8 3 936.91 21.6
 -1 -8 3 943.91 22.5
 0 8 -3 487.35 12.6
 0 8 -3 515.45 12.9
 0 -8 3 504.25 13.1
 0 -8 3 490.35 13.3
 0 -8 3 495.05 12.3
 0 -8 3 501.95 12.4
 -1 8 -3 960 22.3
 -1 8 -3 922.81 22
 1 -8 3 922.71 21.7
 1 -8 3 962.3 22.7
 1 -8 3 918.81 22.4
 1 -8 3 902.11 21.6
 1 -8 3 935.21 22.9
 -2 8 -3 121.49 4.9
 -2 8 -3 131.89 5.1
 2 -8 3 128.29 6
 2 -8 3 129.39 4.9
 2 -8 3 119.89 5.3
 2 -8 3 116.09 4.9
 -3 8 -3 536.85 13.8
 -3 8 -3 522.75 13.6
 3 -8 3 530.45 13.4
 3 -8 3 537.55 14.5
 3 -8 3 527.95 13.8
 -4 8 -3 46.4 4
 -4 8 -3 45.9 3.9
 4 -8 3 42.6 4
 4 -8 3 45.5 5
 4 -8 3 42.4 4.3
 -5 8 -3 939.11 22.3
 -5 8 -3 919.71 22.8
 -5 8 -3 947.01 23.1
 5 -8 3 953.4 22.7
 5 -8 3 942.91 22.8
 5 -8 3 935.01 23.7
 -6 8 -3 223.48 8.2
 -6 8 -3 215.48 7.2
 -6 8 -3 227.88 8
 6 -8 3 234.28 7.9
 6 -8 3 221.08 8.9
 6 -8 3 228.18 7.5
 -7 8 -3 569.04 14.9
 -7 8 -3 565.14 15.6
 -7 8 -3 585.04 16.1
 7 -8 3 582.34 15.4
 7 -8 3 592.34 16.6
 7 -8 3 560.64 14.8
 -8 8 -3 162.48 6.9
 -8 8 -3 167.28 7.8
 8 -8 3 175.68 7.6
 8 -8 3 162.68 6.5
 -9 8 -3 270.37 9.4
 -9 8 -3 279.67 10.4
 9 -8 3 277.27 8.9
 9 -8 3 289.57 10.1
 -10 8 -3 16.7 3.4
 -10 8 -3 14.2 3.8
 10 -8 3 9.7 3.6
 -11 8 -3 2.9 3.8
 -11 8 -3 3.1 3.4
 11 -8 3 5.8 3.9
 -12 8 -3 44.8 7.9
 -12 8 -3 44.3 6.8
 12 -8 3 44.2 7.6
 -13 8 -3 197.38 9.5
 -13 8 -3 185.58 11.1
 13 -8 3 210.98 10.6
 -14 8 -3 170.78 9.6
 -14 8 -3 175.68 11.5
 14 -8 3 162.68 10.9
 -15 8 -3 72.49 10.8
 -15 8 -3 75.99 8.9
 15 -8 3 81.89 10.3
 15 7 -3 13.9 5.6
 -15 -7 3 27.4 7.1
 -15 -7 3 31.1 5.1
 -15 -7 3 19.8 7.3
 14 7 -3 13.7 5.1
 -14 -7 3 19.2 6.4
 -14 -7 3 21.4 6.8
 -14 -7 3 15.9 4.4
 13 7 -3 -7.6 4
 -13 -7 3 1.5 3.7
 -13 -7 3 2.4 5.4
 12 7 -3 104.49 8.2
 -12 -7 3 92.59 9.9
 -12 -7 3 110.69 7
 11 7 -3 374.66 12.5
 -11 -7 3 380.56 11.5
 -11 -7 3 375.16 14.2
 10 7 -3 275.67 9.8
 -10 -7 3 259.27 9
 -10 -7 3 267.37 11.2
 -10 -7 3 258.27 9.7
 9 7 -3 293.87 10
 -9 -7 3 308.77 9.9
 -9 -7 3 303.37 11.4
 -9 -7 3 308.47 9.5
 8 7 -3 231.58 8.2
 -8 -7 3 239.98 9.7
 -8 -7 3 238.88 8.2
 -8 -7 3 233.88 7.9
 -8 -7 3 227.38 8.9
 7 7 -3 287.47 8.9
 -7 -7 3 283.27 9.4
 -7 -7 3 285.27 8.7
 -7 -7 3 289.67 8.9
 -7 -7 3 278.87 9
 -7 -7 3 290.47 10.3
 6 7 -3 327.77 9.4
 -6 -7 3 331.67 10.7
 -6 -7 3 318.07 9.7
 -6 -7 3 334.27 9.6
 -6 -7 3 321.87 9.9
 5 7 -3 26.9 3.4
 -5 -7 3 25.7 3.9
 -5 -7 3 25.6 3.7
 -5 -7 3 33.6 4.5
 -5 -7 3 28.8 4.1
 4 7 -3 269.57 7.8
 -4 -7 3 263.57 8.7
 -4 -7 3 267.57 7.9
 -4 -7 3 276.27 8.2
 -4 -7 3 272.57 8.1
 3 7 -3 163.88 5.6
 3 7 -3 166.48 6
 -3 -7 3 164.38 5.6
 -3 -7 3 150.68 5.4
 -3 -7 3 157.58 6.4
 -3 -7 3 162.28 5.8
 2 7 -3 1421.66 32.4
 2 7 -3 1364.76 32
 -2 -7 3 1387.86 31.7
 -2 -7 3 1368.46 32.3
 -2 -7 3 1390.86 31.7
 -2 -7 3 1402.06 32.2
 1 7 -3 164.28 5.8
 1 7 -3 145.79 5.4
 -1 -7 3 172.58 5.3
 -1 -7 3 187.98 6.1
 -1 -7 3 168.88 5.2
 -1 -7 3 165.38 6
 0 7 -3 1445.36 33.7
 0 7 -3 1490.35 34
 0 -7 3 1442.86 33.4
 0 -7 3 1499.65 33.3
 0 -7 3 1468.15 34
 0 -7 3 1510.35 34.3
 -1 7 -3 300.87 8.2
 -1 7 -3 305.17 8.4
 1 -7 3 294.67 7.9
 1 -7 3 289.87 7.7
 1 -7 3 294.57 8.8
 1 -7 3 293.17 8.5
 1 -7 3 302.97 8.7
 -2 7 -3 946.71 22.2
 -2 7 -3 923.11 21.9
 2 -7 3 914.81 22.1
 2 -7 3 937.11 22.7
 2 -7 3 943.11 23
 2 -7 3 938.11 21.8
 -3 7 -3 204.38 6.5
 -3 7 -3 208.08 6.7
 3 -7 3 204.48 6.4
 3 -7 3 207.28 7.4
 3 -7 3 202.28 6.6
 -4 7 -3 3.7 1.8
 -4 7 -3 4.5 2
 4 -7 3 1.6 2
 4 -7 3 4.4 1.9
 4 -7 3 5.6 2.4
 -5 7 -3 536.45 13.9
 -5 7 -3 523.25 14
 -5 7 -3 525.35 13.3
 5 -7 3 540.45 13.7
 5 -7 3 520.55 14.6
 -6 7 -3 196.48 7.1
 6 -7 3 181.48 6.9
 6 -7 3 169.98 6.1
 -7 7 -3 621.84 16.7
 -7 7 -3 611.04 16.3
 -7 7 -3 600.04 15.5
 7 -7 3 627.64 15.4
 7 -7 3 608.54 16
 -8 7 -3 1151.08 27.9
 -8 7 -3 1183.68 28.8
 8 -7 3 1168.18 27.6
 8 -7 3 1198.48 28.5
 -9 7 -3 199.18 7.6
 -9 7 -3 200.78 8.6
 9 -7 3 198.18 7.1
 9 -7 3 213.58 8.4
 -10 7 -3 8.8 3.5
 -10 7 -3 3.8 2.9
 10 -7 3 2.7 3.3
 -11 7 -3 4.8 3.1
 -11 7 -3 1.6 3.6
 11 -7 3 -0.1 3.6
 -12 7 -3 18.5 3.9
 -12 7 -3 7 4.2
 12 -7 3 15.7 4.3
 -13 7 -3 30 4.5
 -13 7 -3 26 5
 13 -7 3 19.2 4.7
 -14 7 -3 125.89 8.8
 -14 7 -3 140.99 10.7
 14 -7 3 124.79 10.1
 -15 7 -3 171.28 12.4
 -15 7 -3 175.98 10.1
 15 -7 3 187.98 11.8
 -16 7 -3 77.39 9.1
 -16 7 -3 82.09 11.5
 16 -7 3 94.69 10.8
 16 -7 3 66.59 11.1
 16 6 -3 71.59 10.6
 -16 -6 3 63.59 12.1
 -16 -6 3 70.19 8.7
 15 6 -3 139.59 10.9
 -15 -6 3 150.38 9.2
 -15 -6 3 140.69 12.6
 14 6 -3 47.5 8.7
 -14 -6 3 30.8 6.6
 -14 -6 3 26.6 4.5
 13 6 -3 3.4 4.1
 -13 -6 3 7.9 5.5
 -13 -6 3 1.4 3.6
 12 6 -3 2.9 3.7
 -12 -6 3 -4.7 4.8
 -12 -6 3 3.2 3.3
 -12 -6 3 2.7 3.7
 11 6 -3 42.9 6.4
 -11 -6 3 40.5 7.7
 -11 -6 3 27.8 4
 -11 -6 3 38.8 5.3
 10 6 -3 689.43 18.5
 -10 -6 3 697.93 19.8
 -10 -6 3 701.33 17.7
 -10 -6 3 703.93 18.5
 9 6 -3 490.85 13.6
 -9 -6 3 486.25 13.6
 -9 -6 3 473.55 14.8
 -9 -6 3 483.05 12.9
 8 6 -3 579.14 15.4
 -8 -6 3 576.24 14.8
 -8 -6 3 591.04 16.6
 -8 -6 3 606.14 15.4
 7 6 -3 290.27 8.9
 -7 -6 3 295.37 8.6
 -7 -6 3 294.97 8.9
 -7 -6 3 299.67 10.1
 6 6 -3 65.99 4.2
 -6 -6 3 70.99 4
 -6 -6 3 64.29 4.2
 -6 -6 3 64.19 4.2
 -6 -6 3 74.69 5.5
 5 6 -3 322.37 9.1
 -5 -6 3 339.47 9.3
 -5 -6 3 334.67 10.1
 -5 -6 3 332.37 9.4
 -5 -6 3 344.27 9.5
 4 6 -3 228.38 6.8
 -4 -6 3 245.38 7.2
 -4 -6 3 224.38 7.8
 -4 -6 3 241.18 7.2
 -4 -6 3 231.48 7.1
 3 6 -3 62.69 3.4
 -3 -6 3 55.59 4.3
 -3 -6 3 52.89 3.5
 -3 -6 3 58.99 3.6
 -3 -6 3 58.59 3.4
 2 6 -3 933.11 22.5
 2 6 -3 1011.1 23
 -2 -6 3 951.1 22.8
 -2 -6 3 976.9 22.2
 -2 -6 3 905.51 22.1
 -2 -6 3 982.5 22.6
 1 6 -3 358.46 9.8
 1 6 -3 366.36 10.1
 -1 -6 3 381.46 9.6
 -1 -6 3 394.66 10.1
 -1 -6 3 396.26 9.5
 -1 -6 3 397.56 10.2
 0 6 -3 1967.6 44.6
 0 6 -3 1917.41 44.3
 0 -6 3 1925.91 44.1
 0 -6 3 2013.3 44.9
 0 -6 3 2032.4 44
 0 -6 3 1964.8 44.6
 0 -6 3 1984.8 44.8
 -1 6 -3 2485.15 54.19
 -1 6 -3 2407.36 53.89
 1 -6 3 2358.26 53.99
 1 -6 3 2413.96 53.49
 1 -6 3 2393.46 54.39
 1 -6 3 2366.76 53.69
 1 -6 3 2444.16 54.29
 -2 6 -3 334.67 9
 -2 6 -3 346.67 9.2
 2 -6 3 340.47 8.8
 2 -6 3 330.07 9
 2 -6 3 346.37 9.7
 -3 6 -3 154.88 5.5
 -3 6 -3 149.09 5.3
 3 -6 3 155.58 5.3
 3 -6 3 167.88 5.4
 3 -6 3 161.78 6.1
 -4 6 -3 81.59 4.2
 -4 6 -3 82.39 4.3
 4 -6 3 85.39 4.2
 4 -6 3 82.09 3.9
 -5 6 -3 540.85 14
 -5 6 -3 530.75 13.8
 -5 6 -3 518.75 13.2
 5 -6 3 550.14 13.7
 5 -6 3 529.55 13.2
 -6 6 -3 363.26 10.6
 -6 6 -3 360.66 9.8
 -6 6 -3 351.26 9.6
 -6 6 -3 351.26 10.3
 6 -6 3 350.66 9.5
 6 -6 3 354.86 10.2
 -7 6 -3 450.05 12.7
 -7 6 -3 472.45 13.1
 -7 6 -3 449.86 12.5
 -7 6 -3 448.06 11.9
 7 -6 3 439.06 11.6
 7 -6 3 450.15 12.5
 7 -6 3 457.85 11.9
 -8 6 -3 583.64 15.3
 -8 6 -3 600.54 16.2
 8 -6 3 591.74 14.9
 8 -6 3 608.64 15.4
 8 -6 3 600.04 15.8
 -9 6 -3 261.77 8.6
 -9 6 -3 263.67 9.7
 9 -6 3 275.67 9.5
 9 -6 3 256.57 8.1
 -10 6 -3 339.67 11.7
 -10 6 -3 327.27 10.5
 10 -6 3 351.86 9.9
 10 -6 3 337.27 11.4
 -11 6 -3 20.4 4.2
 -11 6 -3 19.6 3.5
 11 -6 3 20 4.2
 -12 6 -3 31.8 4.8
 -12 6 -3 39.4 6.1
 12 -6 3 28.4 4.5
 -13 6 -3 14.2 4
 -13 6 -3 19 4.8
 13 -6 3 18.8 4.5
 -14 6 -3 86.19 9.5
 -14 6 -3 97.19 7.9
 14 -6 3 92.79 9.4
 -15 6 -3 76.39 8.3
 -15 6 -3 77.59 10.4
 15 -6 3 70.09 10
 -16 6 -3 67.09 11.1
 -16 6 -3 79.29 8.7
 16 -6 3 59.29 10.7
 16 -6 3 66.79 10.6
 16 5 -3 173.88 11.9
 -16 -5 3 170.18 10
 -16 -5 3 164.58 13.3
 15 5 -3 112.79 10.2
 -15 -5 3 100.09 11.3
 -15 -5 3 116.69 8.5
 14 5 -3 159.88 10.3
 -14 -5 3 155.08 11.6
 -14 -5 3 148.49 8.4
 13 5 -3 52.29 8
 -13 -5 3 53.49 8
 -13 -5 3 64.59 9.1
 -13 -5 3 74.49 6.6
 12 5 -3 7.9 3.8
 -12 -5 3 10.6 3.8
 -12 -5 3 6.2 4.8
 -12 -5 3 14.5 3.4
 11 5 -3 1.2 3.2
 -11 -5 3 3.8 2.9
 -11 -5 3 3.3 4.2
 -11 -5 3 5.7 3.3
 10 5 -3 327.97 10.8
 -10 -5 3 318.47 11.9
 -10 -5 3 338.17 9.9
 -10 -5 3 320.27 10.6
 9 5 -3 749.73 19
 -9 -5 3 745.63 18.2
 -9 -5 3 714.13 19.9
 -9 -5 3 751.72 18.9
 8 5 -3 740.93 18.5
 -8 -5 3 748.53 18.4
 -8 -5 3 716.33 19.4
 -8 -5 3 721.53 17.8
 7 5 -3 451.65 12.1
 -7 -5 3 455.15 11.6
 -7 -5 3 446.76 13.1
 -7 -5 3 448.66 12.1
 6 5 -3 773.32 18.6
 -6 -5 3 770.12 18.2
 -6 -5 3 759.22 19.4
 -6 -5 3 769.72 18.5
 -6 -5 3 759.62 18.6
 5 5 -3 599.34 14.9
 -5 -5 3 609.94 14.9
 -5 -5 3 621.04 14.7
 -5 -5 3 588.54 15.7
 -5 -5 3 612.34 14.9
 4 5 -3 25.9 2.7
 -4 -5 3 24.4 2.9
 -4 -5 3 25.3 2.7
 -4 -5 3 17.2 2.6
 3 5 -3 21.3 2.5
 -3 -5 3 13.1 2.3
 -3 -5 3 23 2.9
 -3 -5 3 16.1 2.1
 -3 -5 3 26.3 2.6
 2 5 -3 125.89 4.6
 2 5 -3 113.79 4.2
 -2 -5 3 118.59 4.1
 -2 -5 3 99.69 4.1
 -2 -5 3 124.09 4.3
 -2 -5 3 121.29 4.7
 1 5 -3 1505.85 34.7
 1 5 -3 1455.55 34.4
 -1 -5 3 1550.14 34
 -1 -5 3 1499.25 34.2
 -1 -5 3 1519.55 34.6
 -1 -5 3 1572.54 34.5
 0 5 -3 501.45 12.7
 0 5 -3 523.15 13
 0 -5 3 538.05 12.3
 0 -5 3 530.75 13.1
 0 -5 3 535.25 13.3
 0 -5 3 519.85 12.9
 0 -5 3 525.95 12.6
 -1 5 -3 2475.45 54.79
 -1 5 -3 2531.95 54.99
 1 -5 3 2350.56 54.59
 1 -5 3 2436.06 55.19
 1 -5 3 2458.15 54.29
 1 -5 3 2415.46 54.79
 1 -5 3 2515.15 55.19
 -2 5 -3 1141.89 26.6
 -2 5 -3 1186.98 26.8
 2 -5 3 1150.48 27.1
 2 -5 3 1147.19 26.4
 2 -5 3 1165.28 26.6
 -3 5 -3 409.46 10.6
 -3 5 -3 420.16 10.9
 3 -5 3 424.76 10.5
 3 -5 3 415.76 10.6
 -4 5 -3 21.7 3
 -4 5 -3 20.2 3
 -4 5 -3 22.4 2.6
 4 -5 3 21.7 2.5
 4 -5 3 22.5 3.1
 4 -5 3 20.8 2.4
 -5 5 -3 647.54 15.4
 -5 5 -3 603.54 15.2
 -5 5 -3 636.34 16
 -5 5 -3 627.74 15.8
 5 -5 3 628.84 15.6
 5 -5 3 647.04 15.1
 -6 5 -3 622.64 15.3
 -6 5 -3 616.24 16.1
 -6 5 -3 617.24 15.8
 -6 5 -3 591.94 15.1
 6 -5 3 632.04 15.2
 6 -5 3 635.44 15.7
 6 -5 3 628.44 14.9
 -7 5 -3 593.04 16
 -7 5 -3 604.44 15.3
 -7 5 -3 600.14 15
 -7 5 -3 603.94 15.8
 7 -5 3 595.14 14.7
 7 -5 3 618.44 15.6
 7 -5 3 613.94 15.1
 -8 5 -3 1160.08 27.3
 -8 5 -3 1133.59 27.8
[truncated: 3,704,017 more chars]
